# Supplementary material for: A multi-tissue atlas of allelic-specific expression reveals the characteristics, mechanisms, and relationship with dominant effects in cattle
Source: Research Square preprint supplement (doi:10.21203/rs.3.rs-5530951/v1), 2025-01-09
Supplement: Supplementary file 1 [file 09522747f0cac7653138d391.docx]

**A multi-tissue atlas of allelic-specific expression reveals the characteristics, mechanisms, and relationship with dominant effects in cattle**

**Supplementary Materials and Methods. Multiplex PCR, library construct, sequencing and variant detection**

Multiplex PCR process involved two rounds of PCR amplification followed by two rounds of purification at Adsen Biotechnology Co., Ltd. (Urumchi, China).

The reaction system for the first PCR was as follows: 1 µL DNA (50–200 ng), 1 µL Primer mix F, 1 µL Primer mix R, 10 µL 2× Hieff® PCR Master Mix, and 7 µL ddH₂O. The amplification program consisted of an initial denaturation at 98°C for 3 minutes (1 cycle), followed by denaturation at 98°C for 10 seconds (18 cycles), annealing at 53°C for 30 seconds, extension at 72°C for 15 seconds, and a final extension at 72°C for 5 minutes. After the first PCR, 16 µL of DNA Clean Beads were equilibrated to room temperature for approximately 30 minutes and thoroughly mixed by vortexing before being added to the PCR reaction. The mixture was vortexed again to ensure complete mixing, briefly spun down, and left to sit at room temperature for 5 minutes. The tube was then placed on a magnetic rack for 5 minutes until the solution cleared, and the supernatant was carefully removed. The beads were washed twice with 180 µL of fresh 80% ethanol and allowed to air-dry at room temperature until all ethanol had evaporated (approximately 5 minutes). A total of 14 µL ddH₂O was added, and the mixture was briefly vortexed and spun down. After sitting at room temperature for 5 minutes, the tube was placed on the magnetic rack again for 5 minutes until the solution cleared, and 12.5 µL of the supernatant was carefully collected for further use.

The second PCR reaction used 12.5 µL of the purified product from the first PCR, 2.5 µL of MGI dual-end index mix, and 10 µL of 2× Hieff® PCR Master Mix. The amplification program differed in cycling, with denaturation at 98°C for 10 seconds (10 cycles), annealing at 60°C for 20 seconds, and extension at 72°C for 15 seconds, followed by a final extension at 72°C for 5 minutes. Following the second PCR, DNA Clean Beads were again prepared by equilibrating to room temperature for 30 minutes and vortexing. The magnetic bead purification steps were performed similarly, with the addition of 20 µL of beads and two washes with 180 µL of fresh 80% ethanol, followed by air-drying. In this step, 32 µL of ddH₂O was added for elution, and after clearing on the magnetic rack, 30 µL of the supernatant was collected, yielding the final library.

Sequencing and variant detection were performed by Adsen Biotechnology Co., Ltd. (Urumchi, China). Based on the multiplex PCR library, high-throughput sequencing was conducted on the Illumina NovaSeq 6000 platform (Illumina Inc., USA) to generate raw reads. These raw reads were then filtered using fastp (version 0.23.4) with the following parameters: adapter sequences were removed, reads with an N content exceeding 10% were filtered out, and reads in which more than 50% of bases had a quality score below 10 were discarded.

Short reads were aligned to the reference genome using Burrows-Wheeler Aligner (BWA) software. Subsequently, Samtools (version 1.9) was applied to filter out redundant reads based on their mapped positions in the reference genome, enhancing the accuracy of downstream variant calling. SNP detection was performed with the HaplotypeCaller algorithm in GATK4, generating a gVCF file for each individual. Joint genotyping was then conducted across the population, followed by additional filtering to obtain the final set of variant sites and genotype information.

**
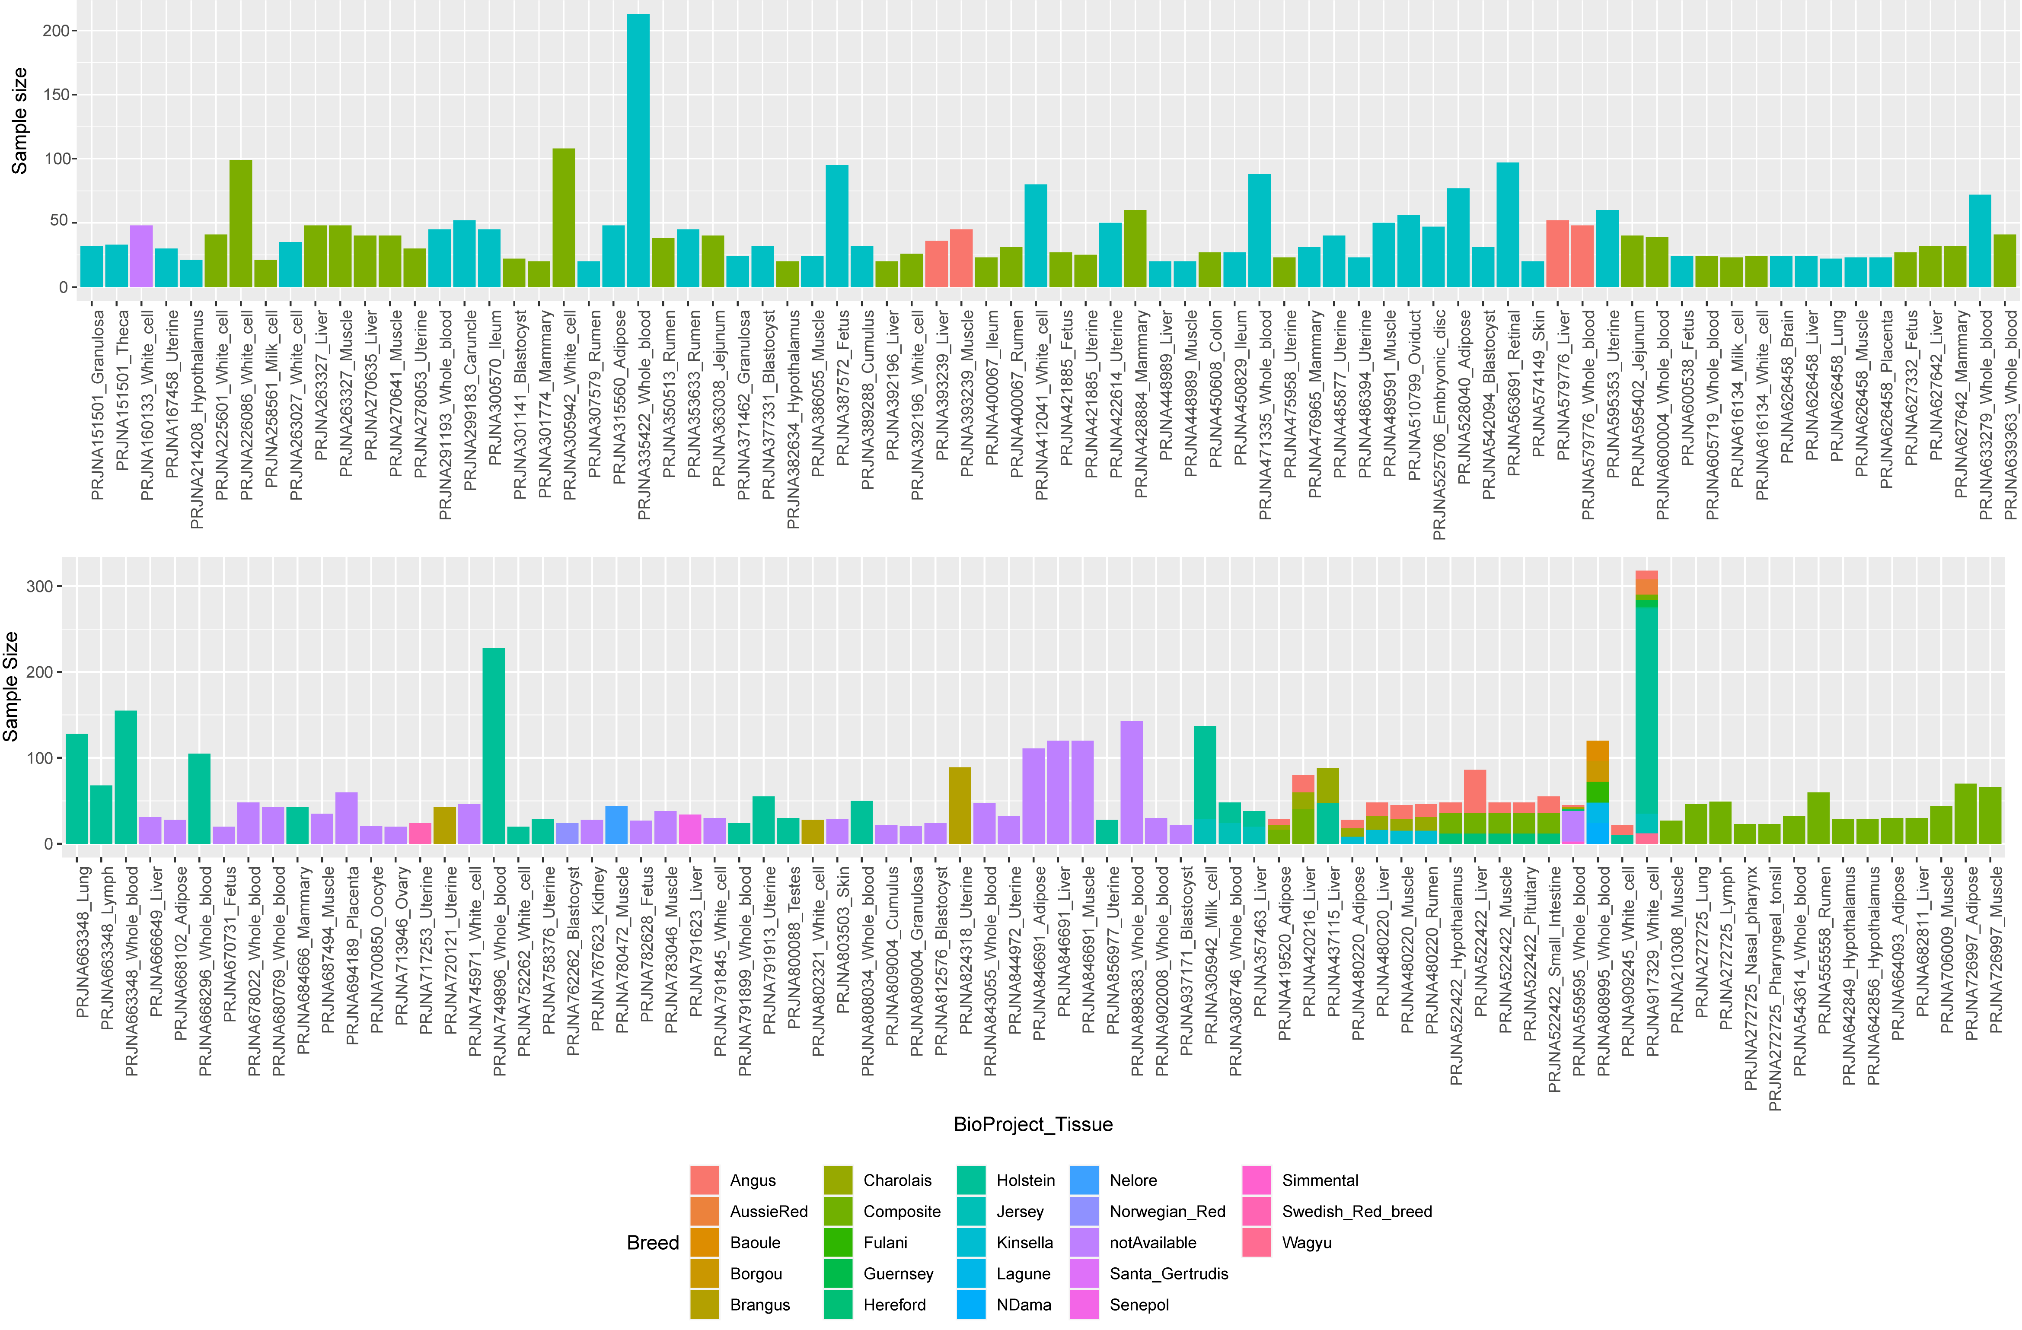
**

**Fig. S1 Stacked bar illustrating the sample size and breed composition for 157 subsets.**


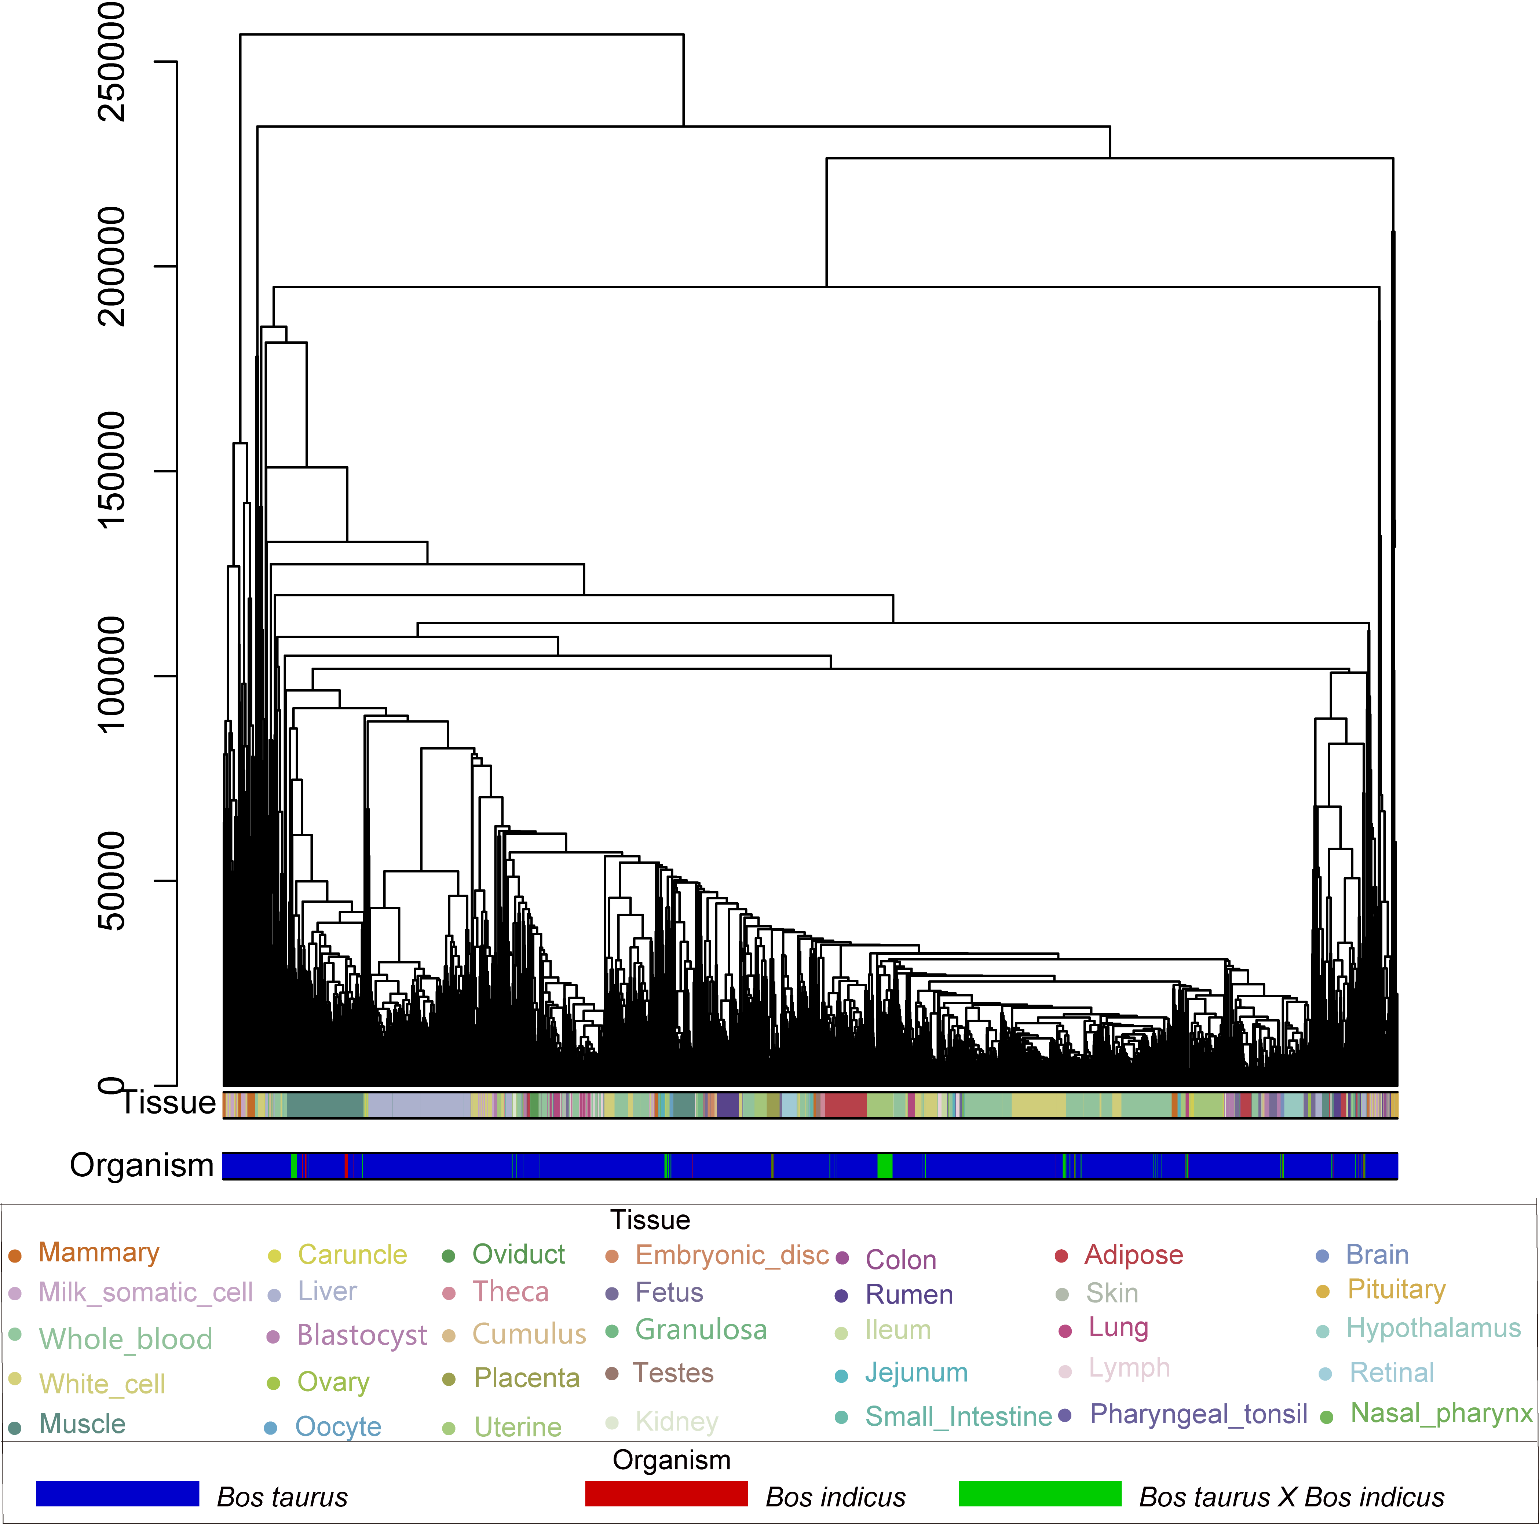


**Fig. S2 Hierarchical clustering of samples (n = 7,532) based on the TPM values of 25,365 expressed genes (mean TPM > 0.1).**


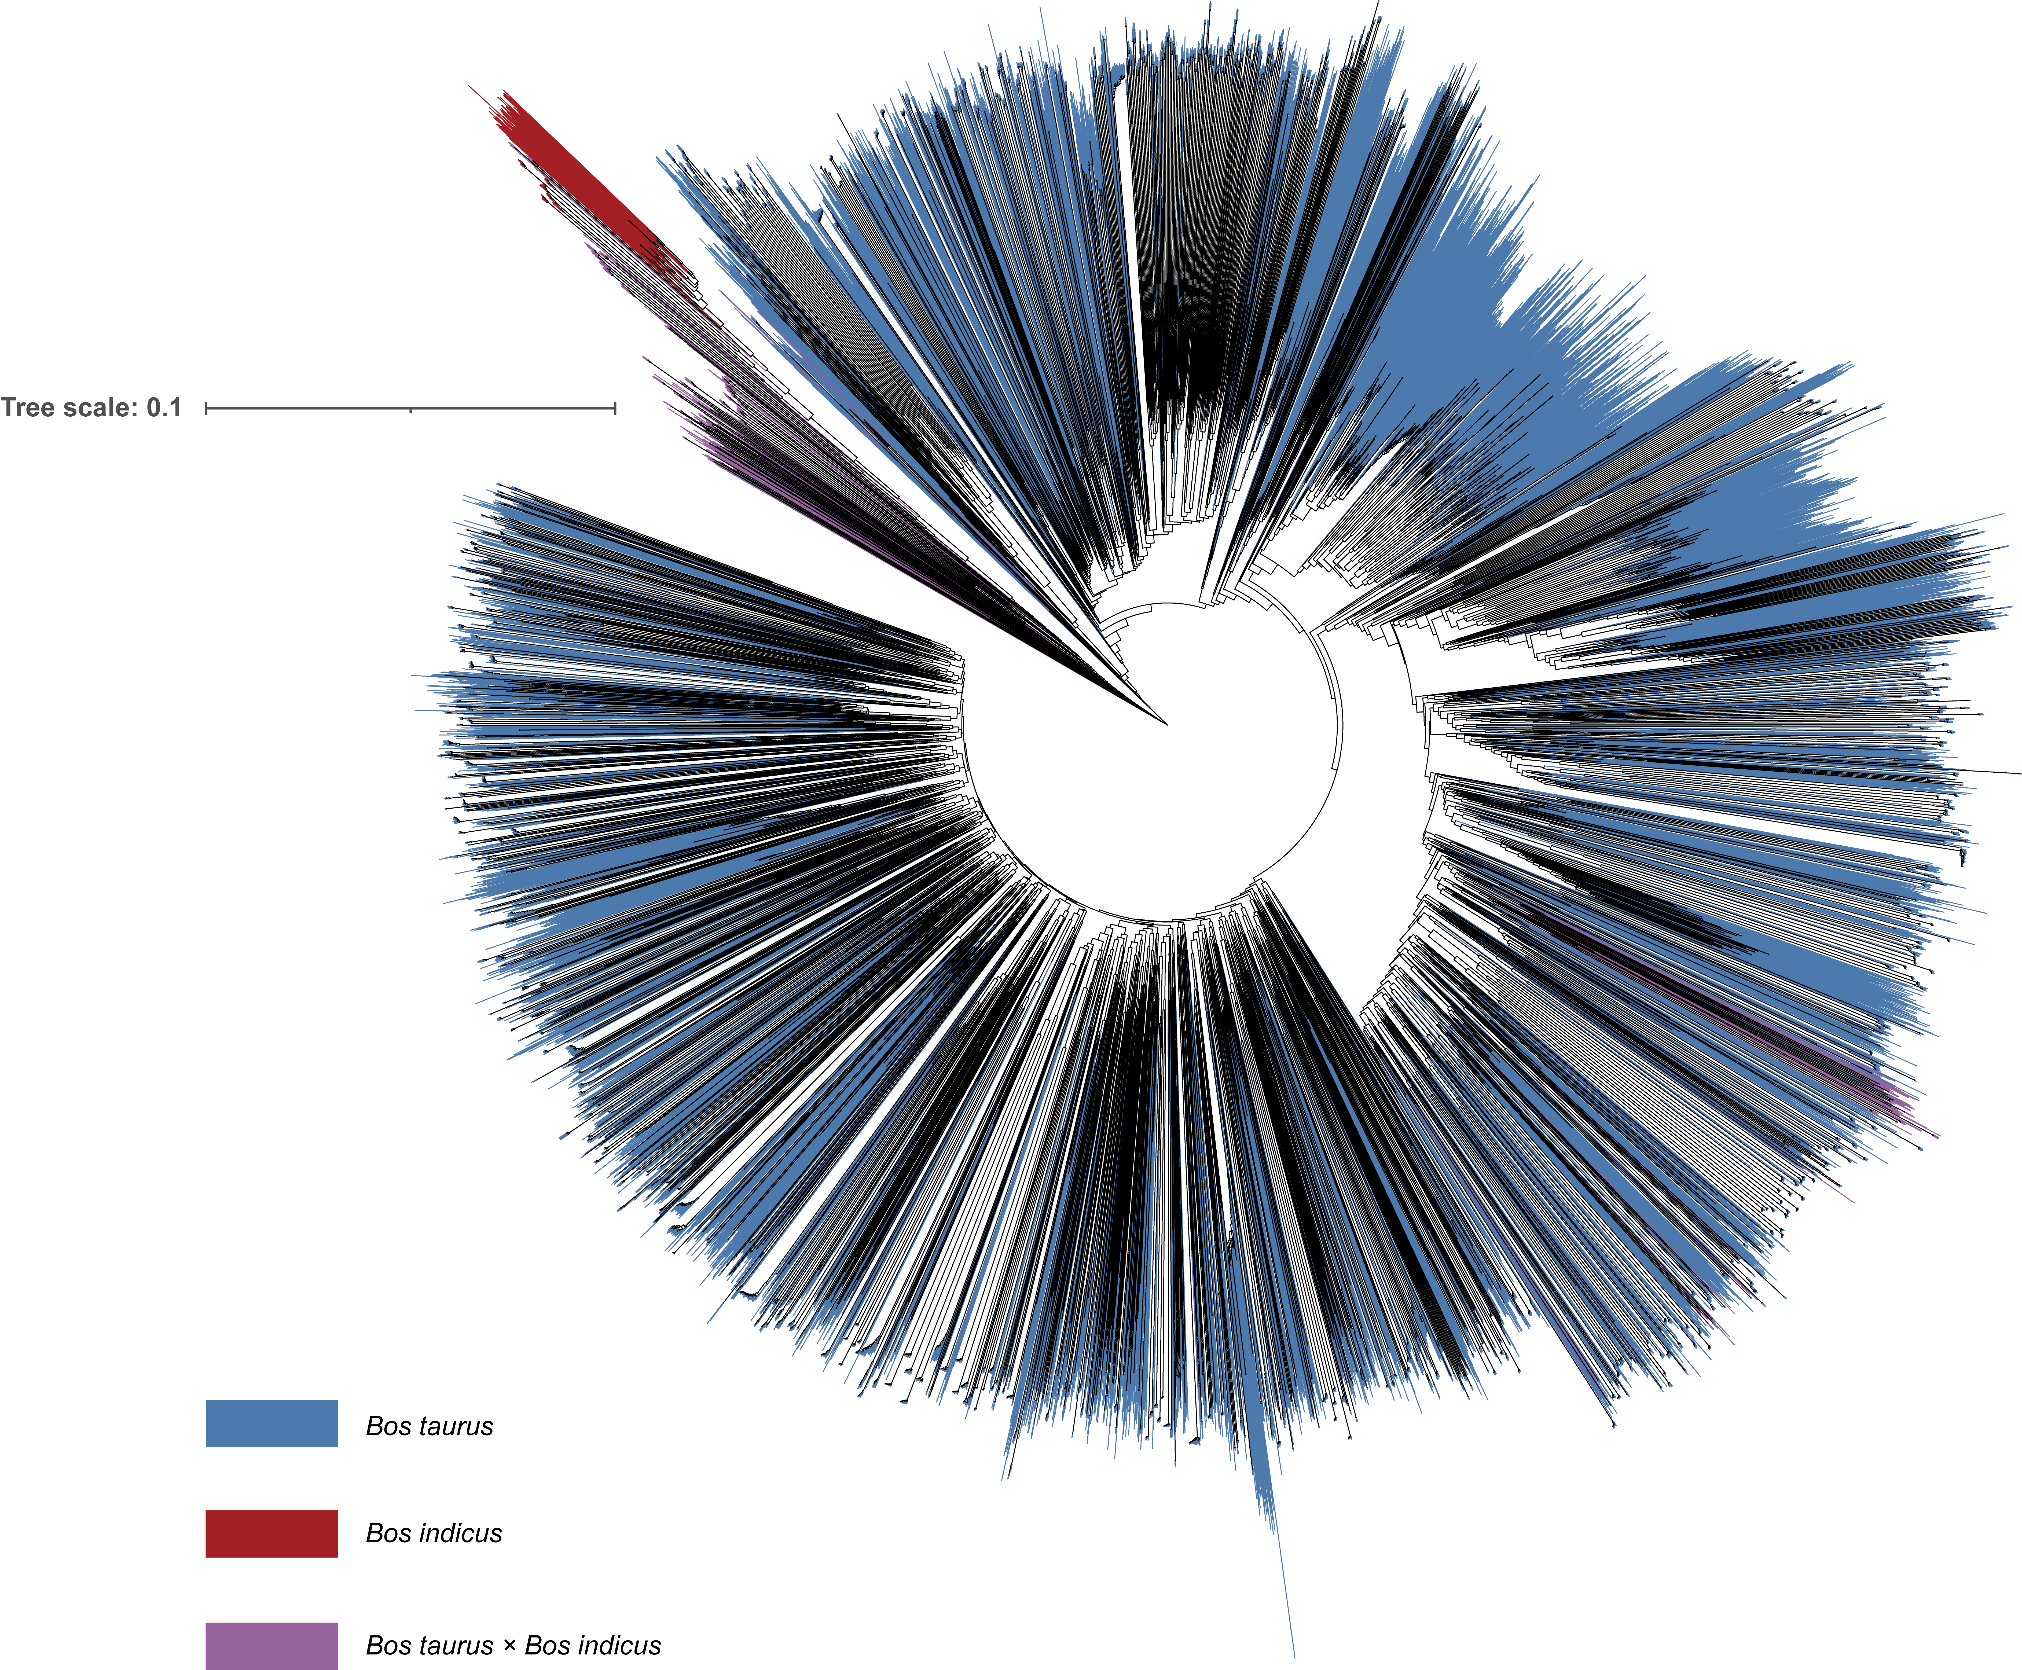


**Fig. S3 Neighbor-joining (NJ) tree of samples (n = 7,532) based on imputed genotypes.**


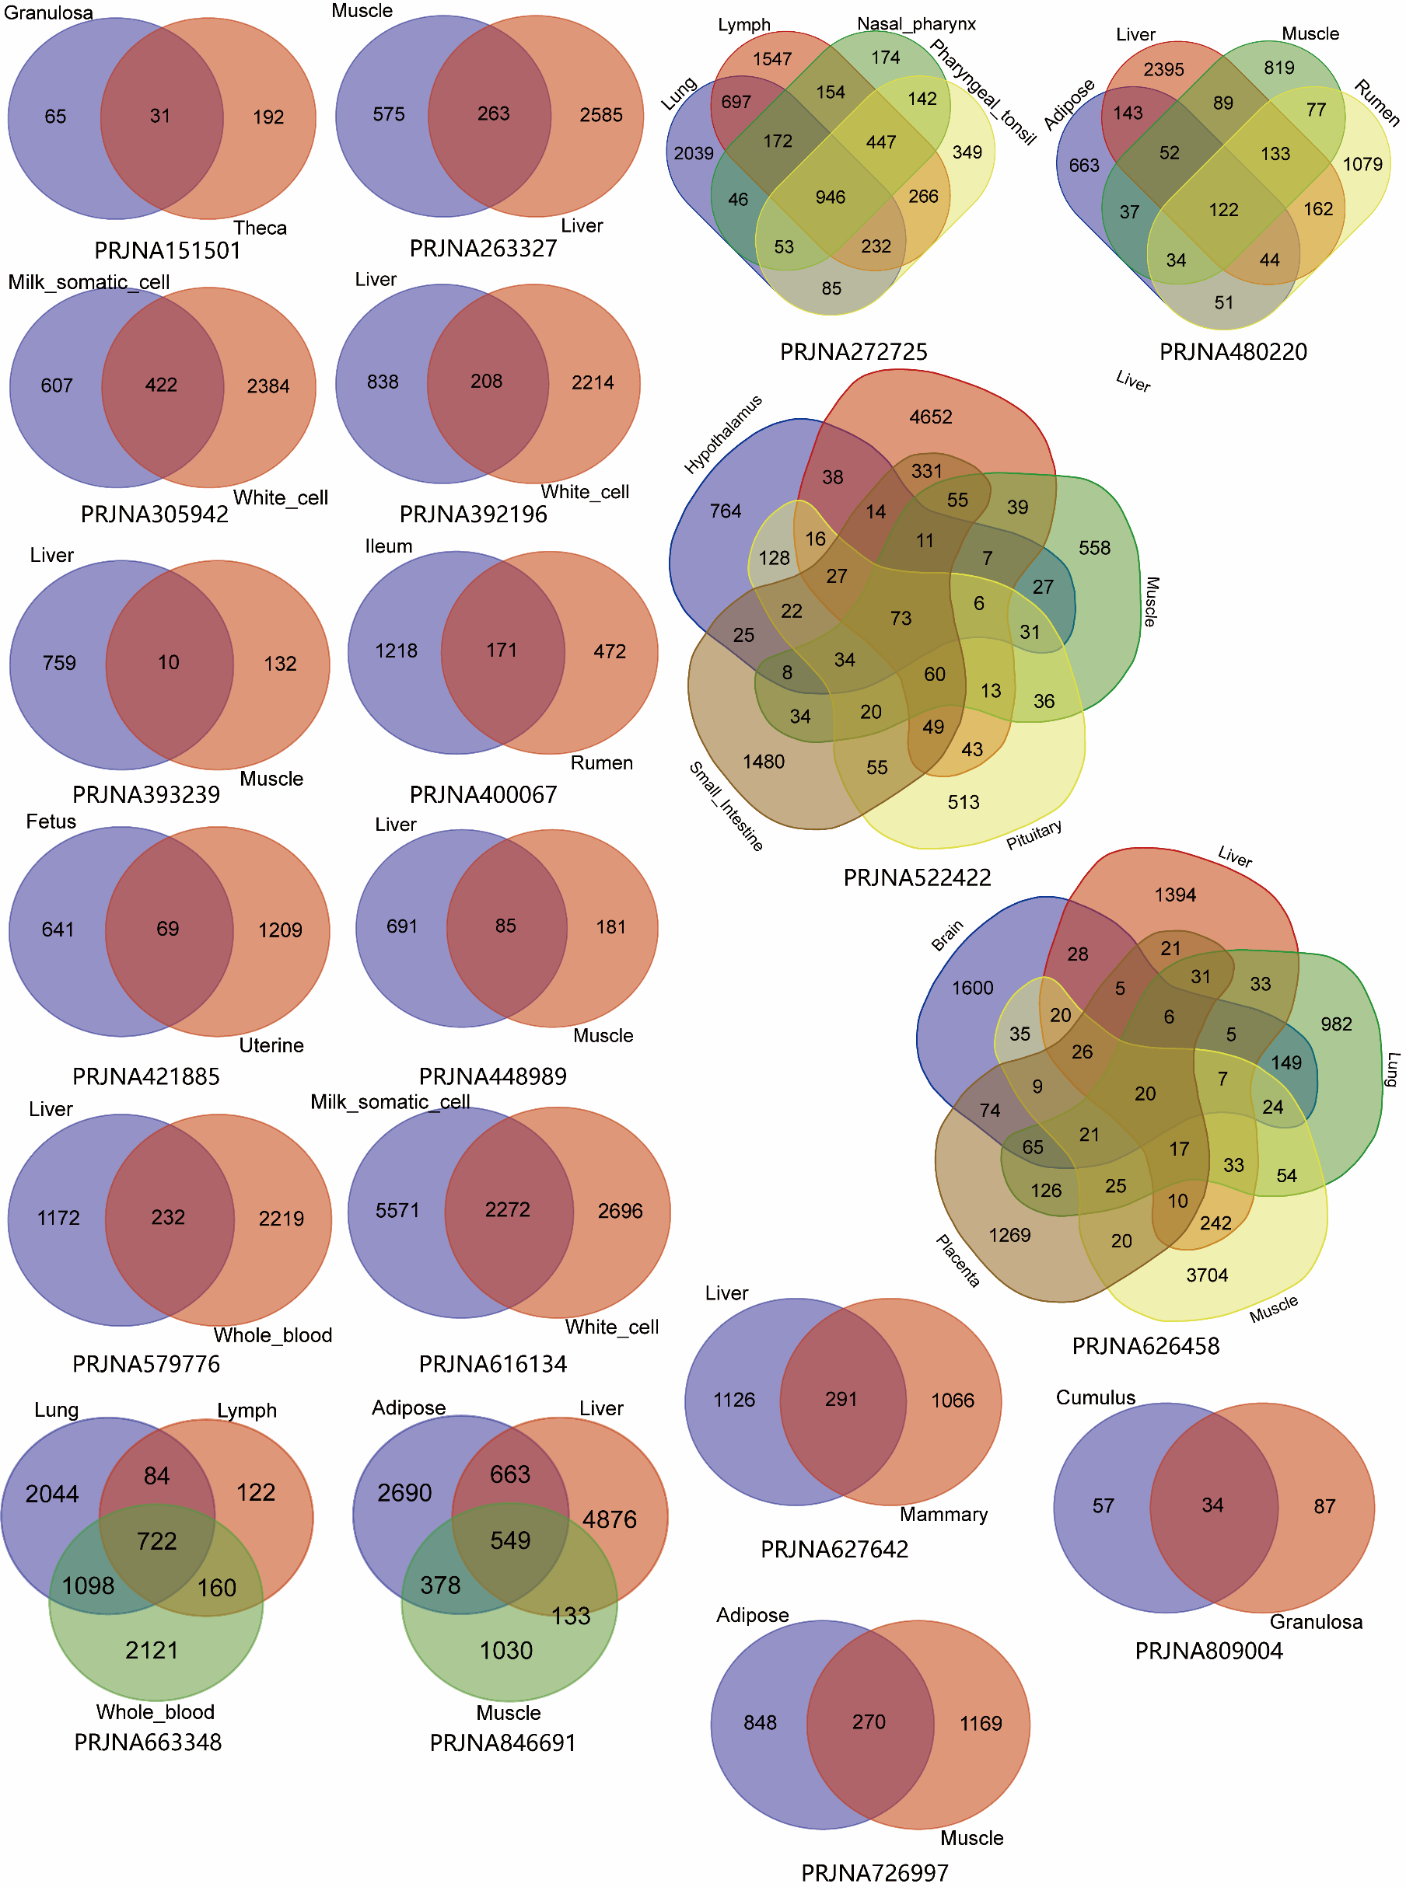


**Fig. S4 Venn diagrams illustrating the overlap of ASE variants across tissues within each BioProject.**

**
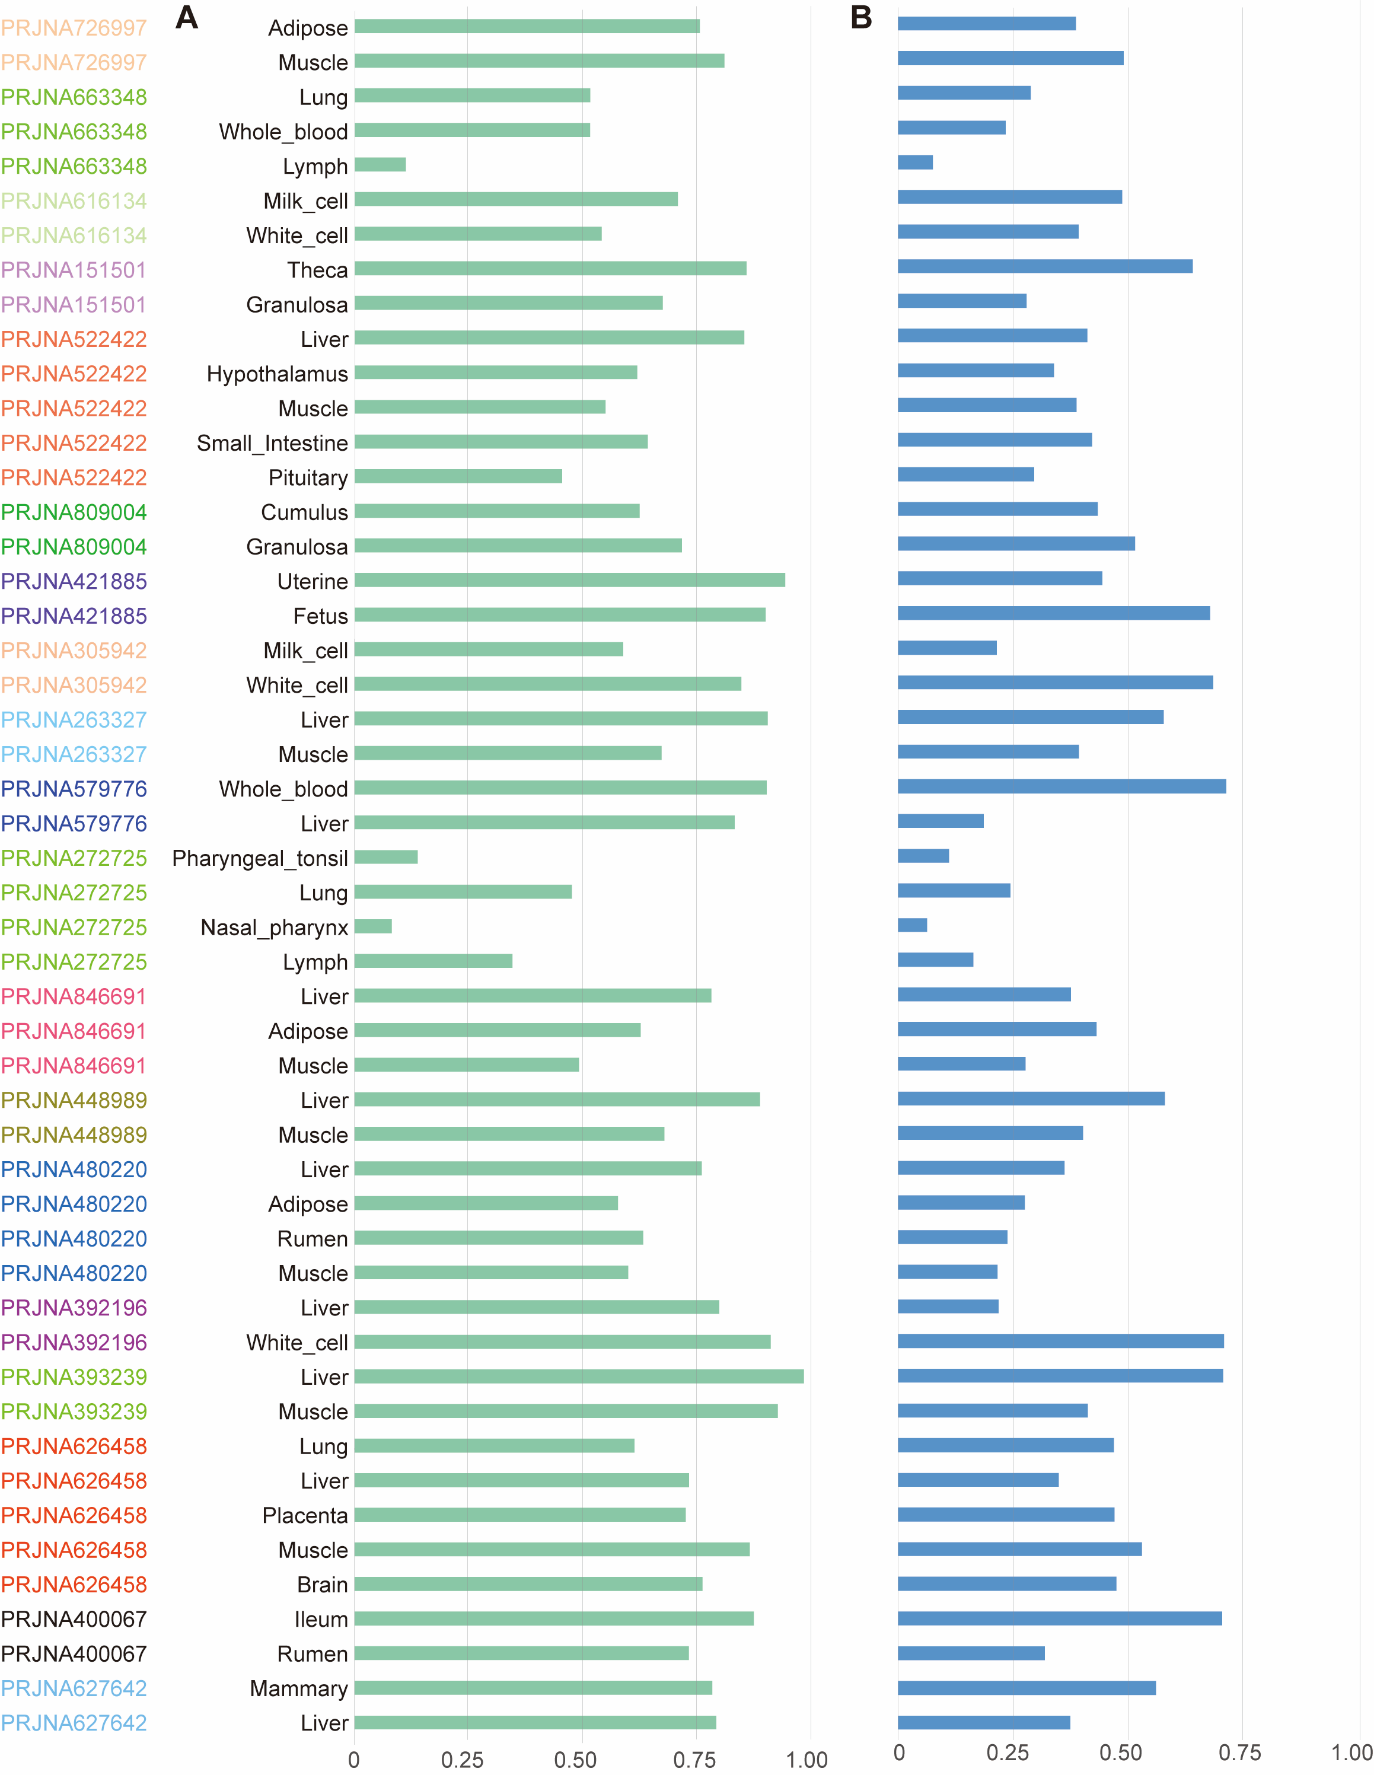
**

**Fig. S5 Bar plots showing the proportions of ASE variants unique to one tissue within each BioProject for all SNPs (A) and shared heterozygous SNPs (B) across different tissues.**


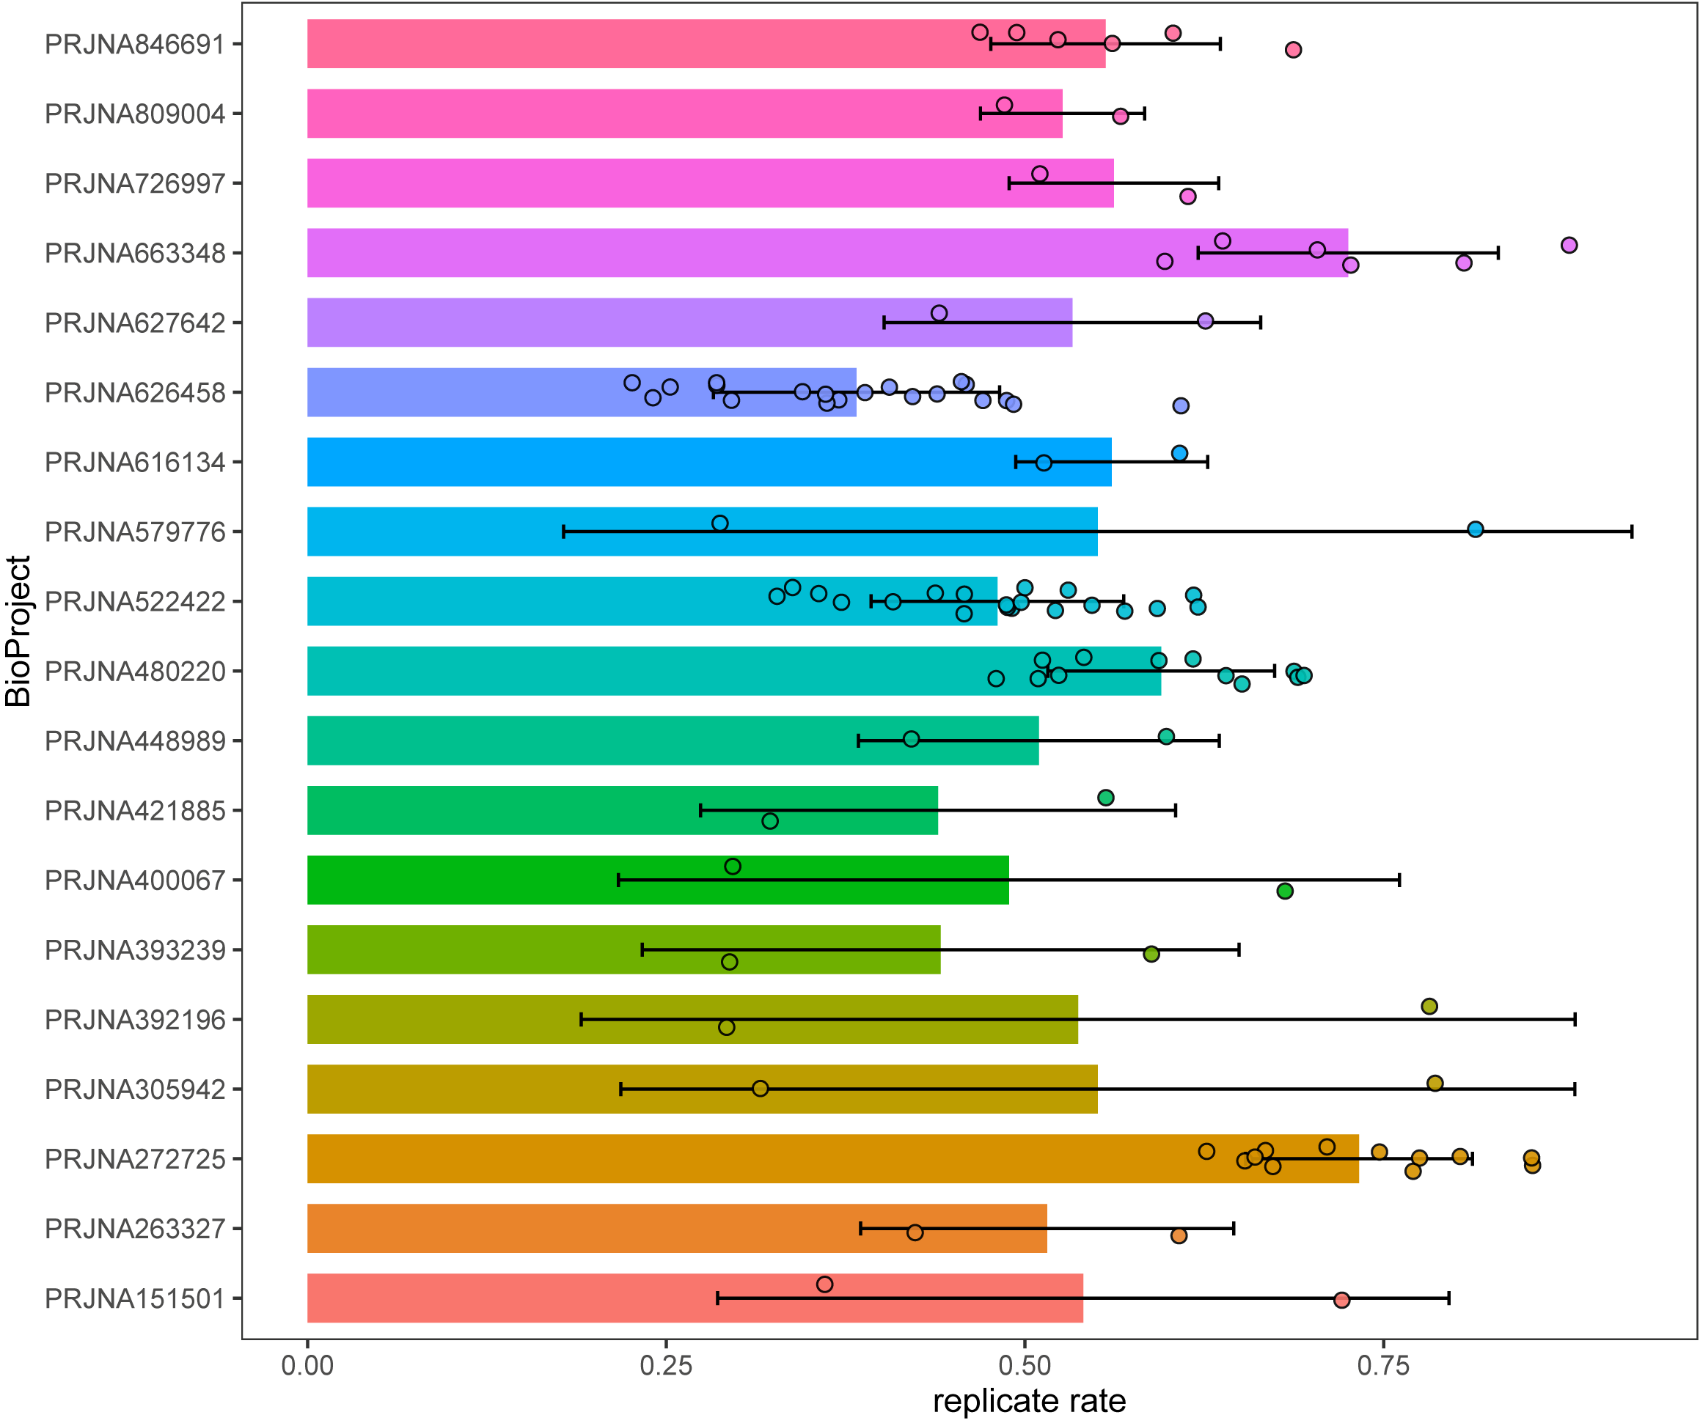


**Fig. S6 Replicate rate of ASE variants across different tissues within the same BioProject.**

**
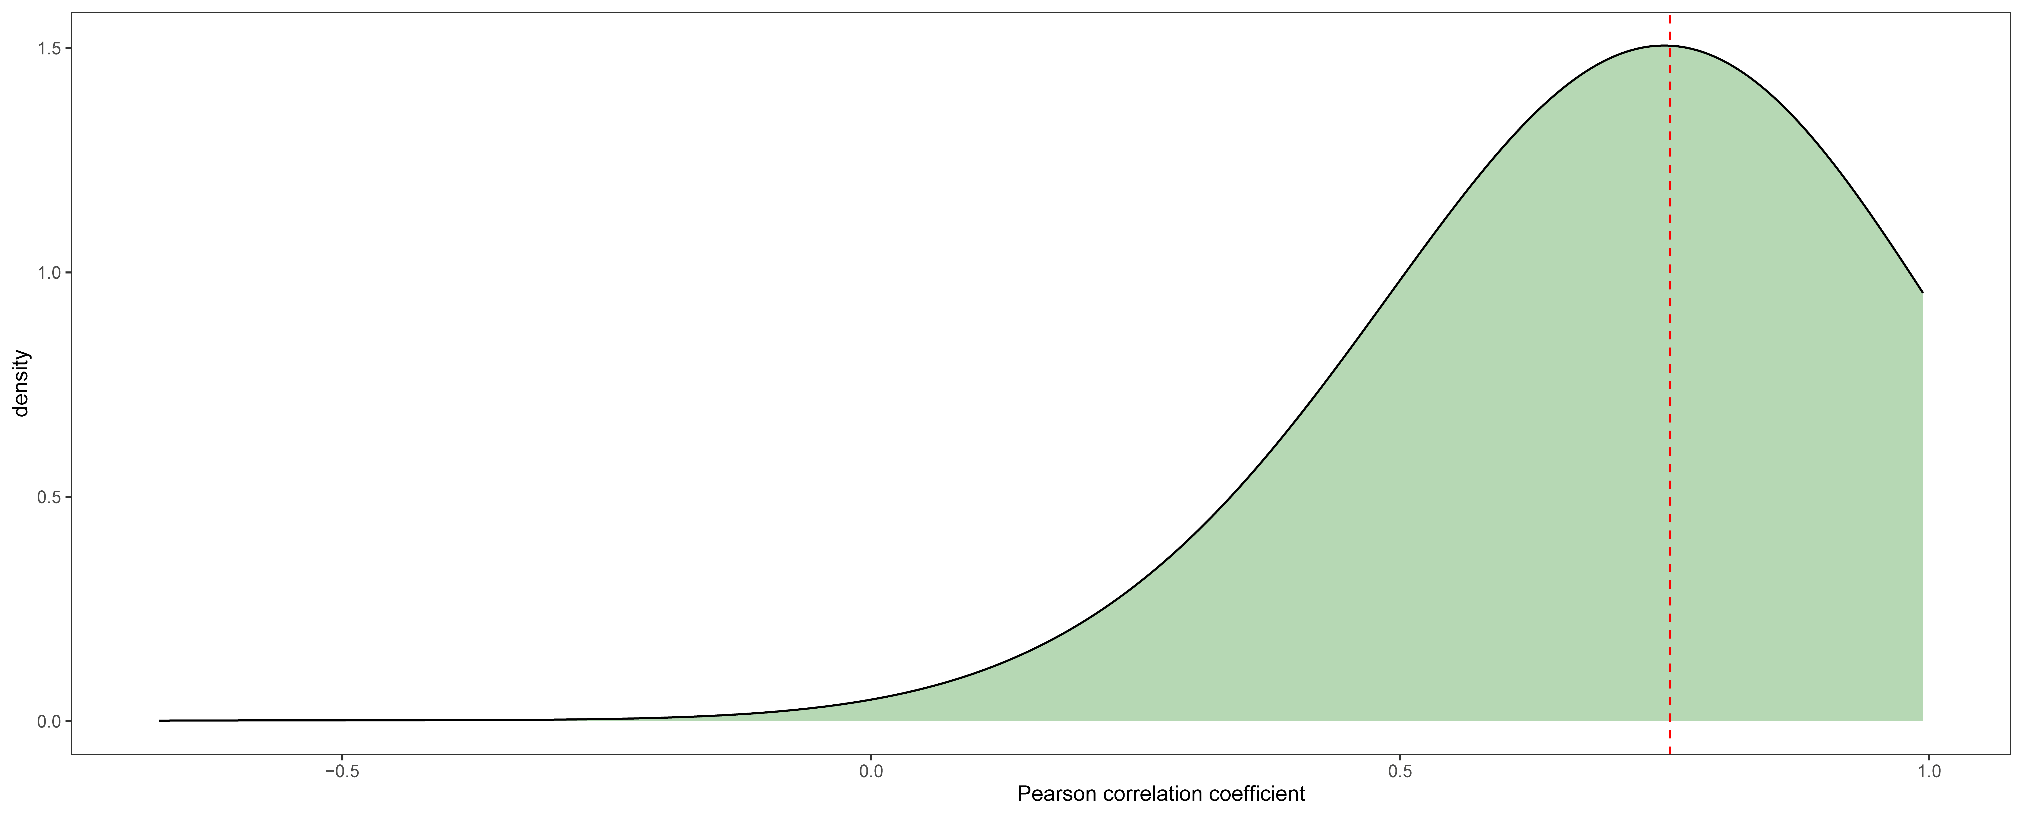
**

**Fig. S7 Density plot depicting the distribution of Pearson correlation coefficients for effect sizes of shared ASE variants across different tissues.** Non-significant correlations (757 out of 7,585 pairwise comparisons) were excluded.


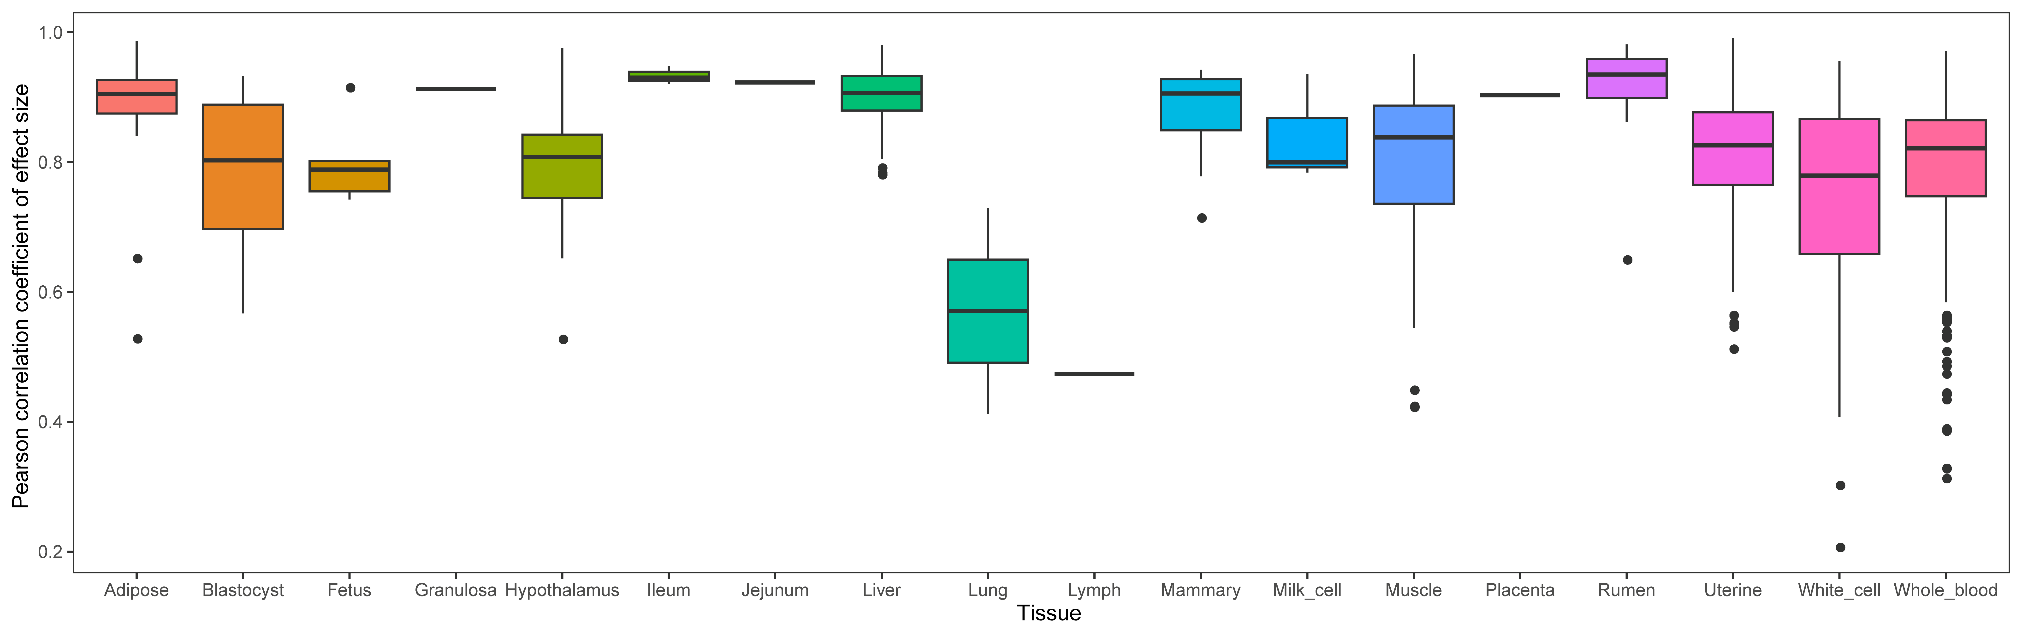


**Fig. S8 Boxplots showing Pearson correlation coefficients for the effect sizes of ASE variants shared within the same tissue across different BioProjects.** Only comparisons with 12 or more overlapping ASE variants were included, and only variants with the same ASE direction in each subset were considered. Non-significant correlations (33 out of 740 pairwise comparisons) were excluded.


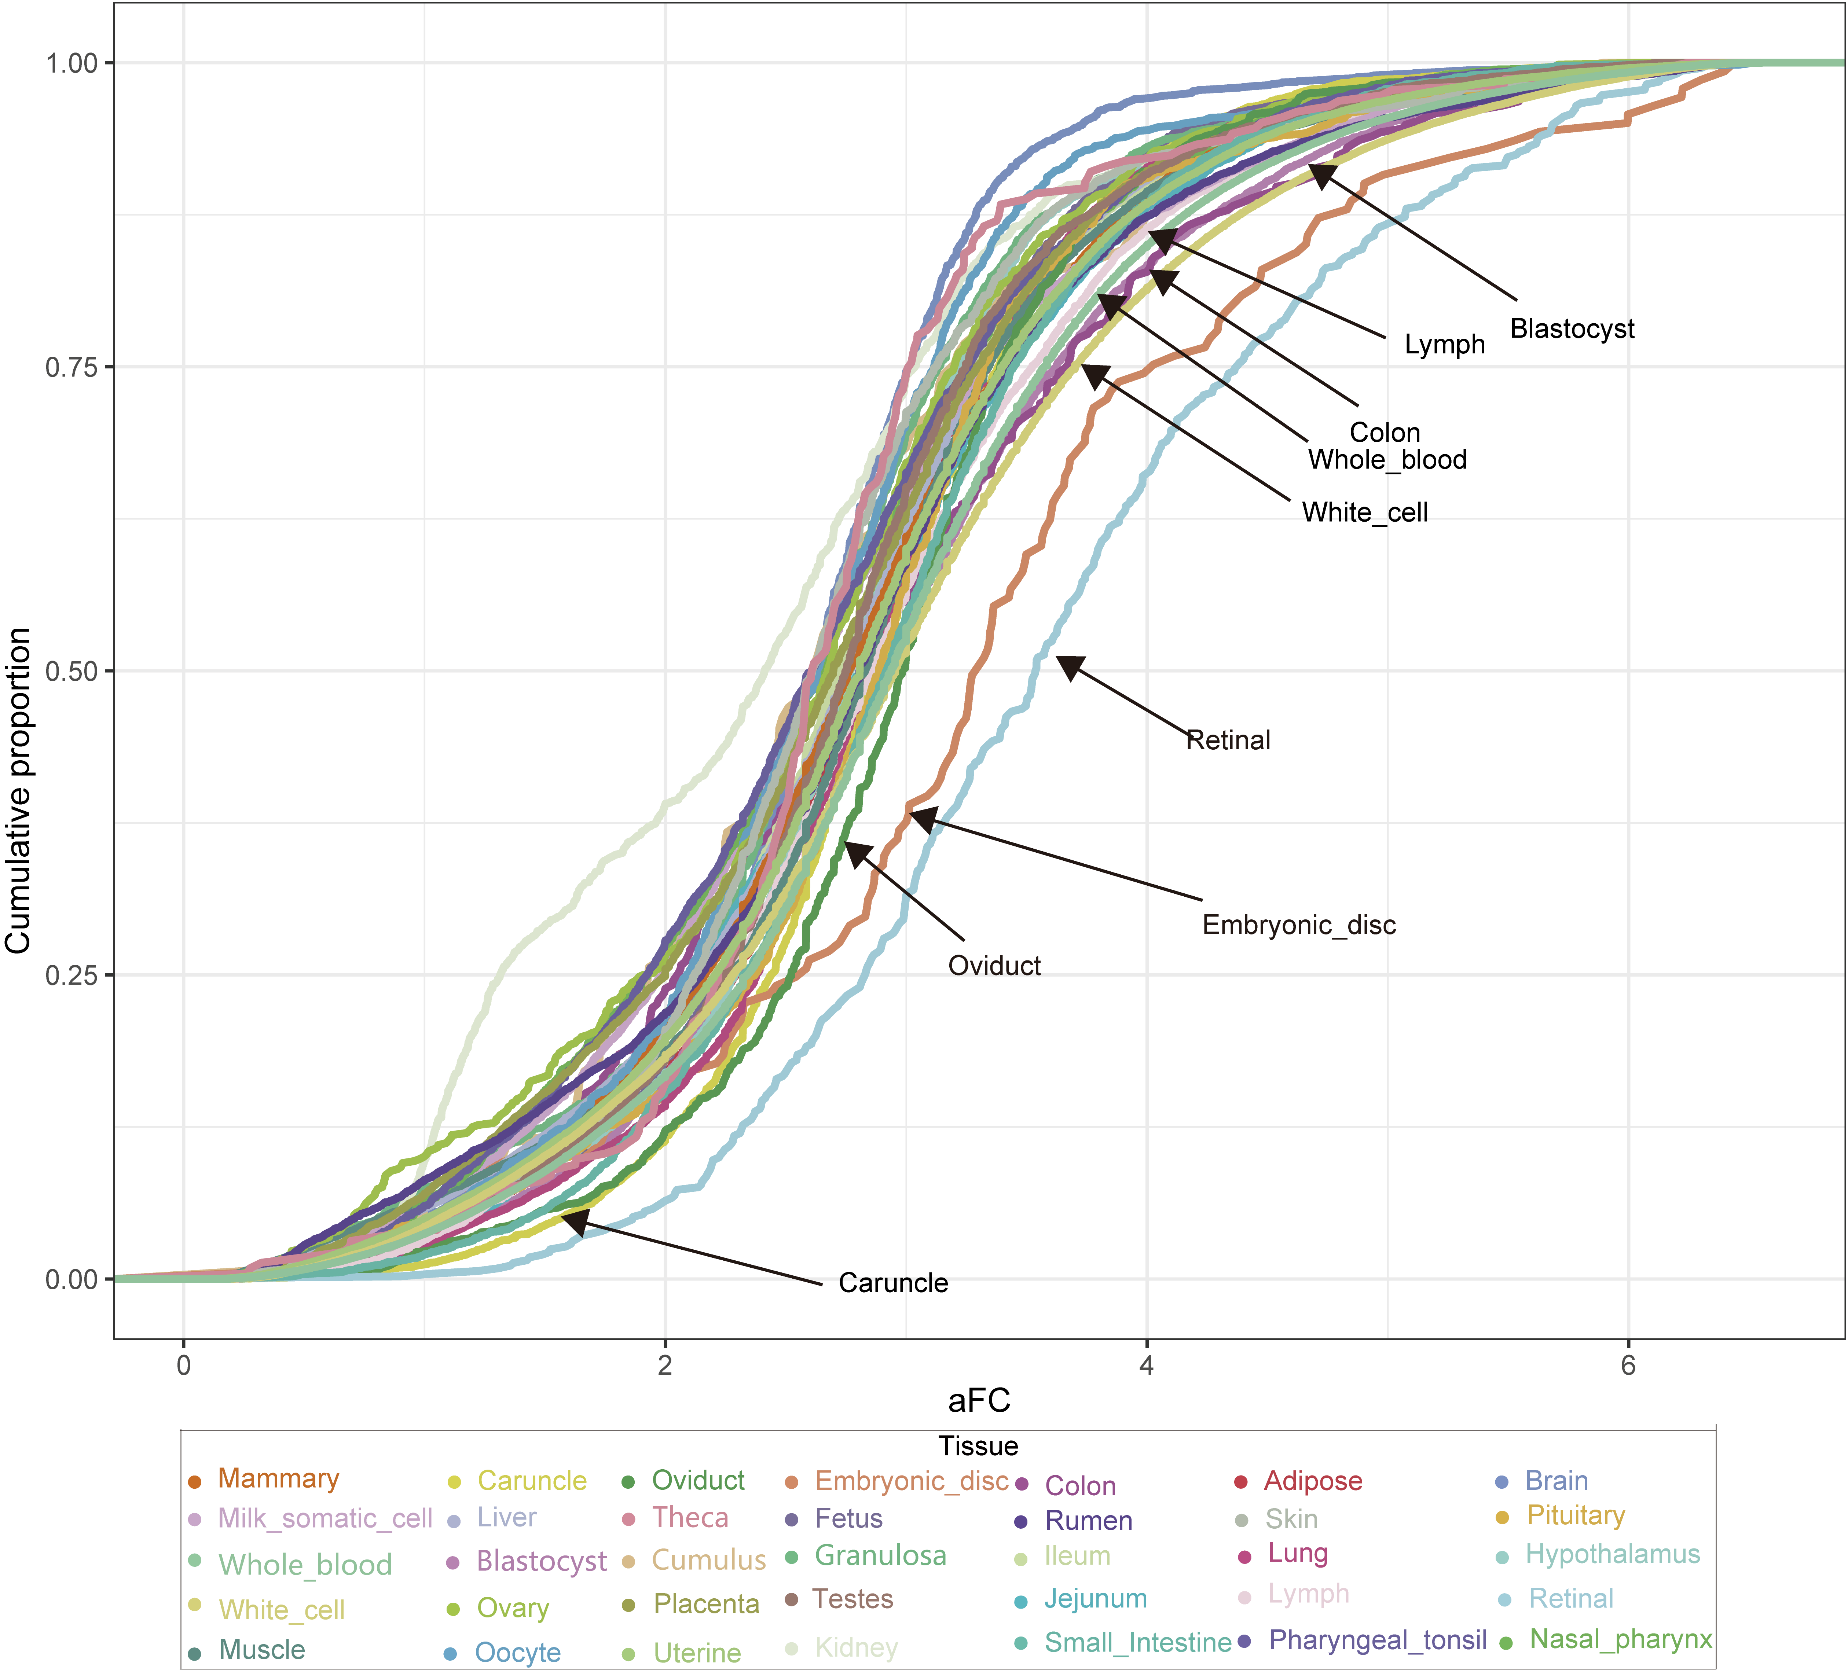


**Fig. S9 Cumulative proportion plot of the |log 2 (aFC)| distribution of ASE variants across the 35 tissues analyzed in our study.**


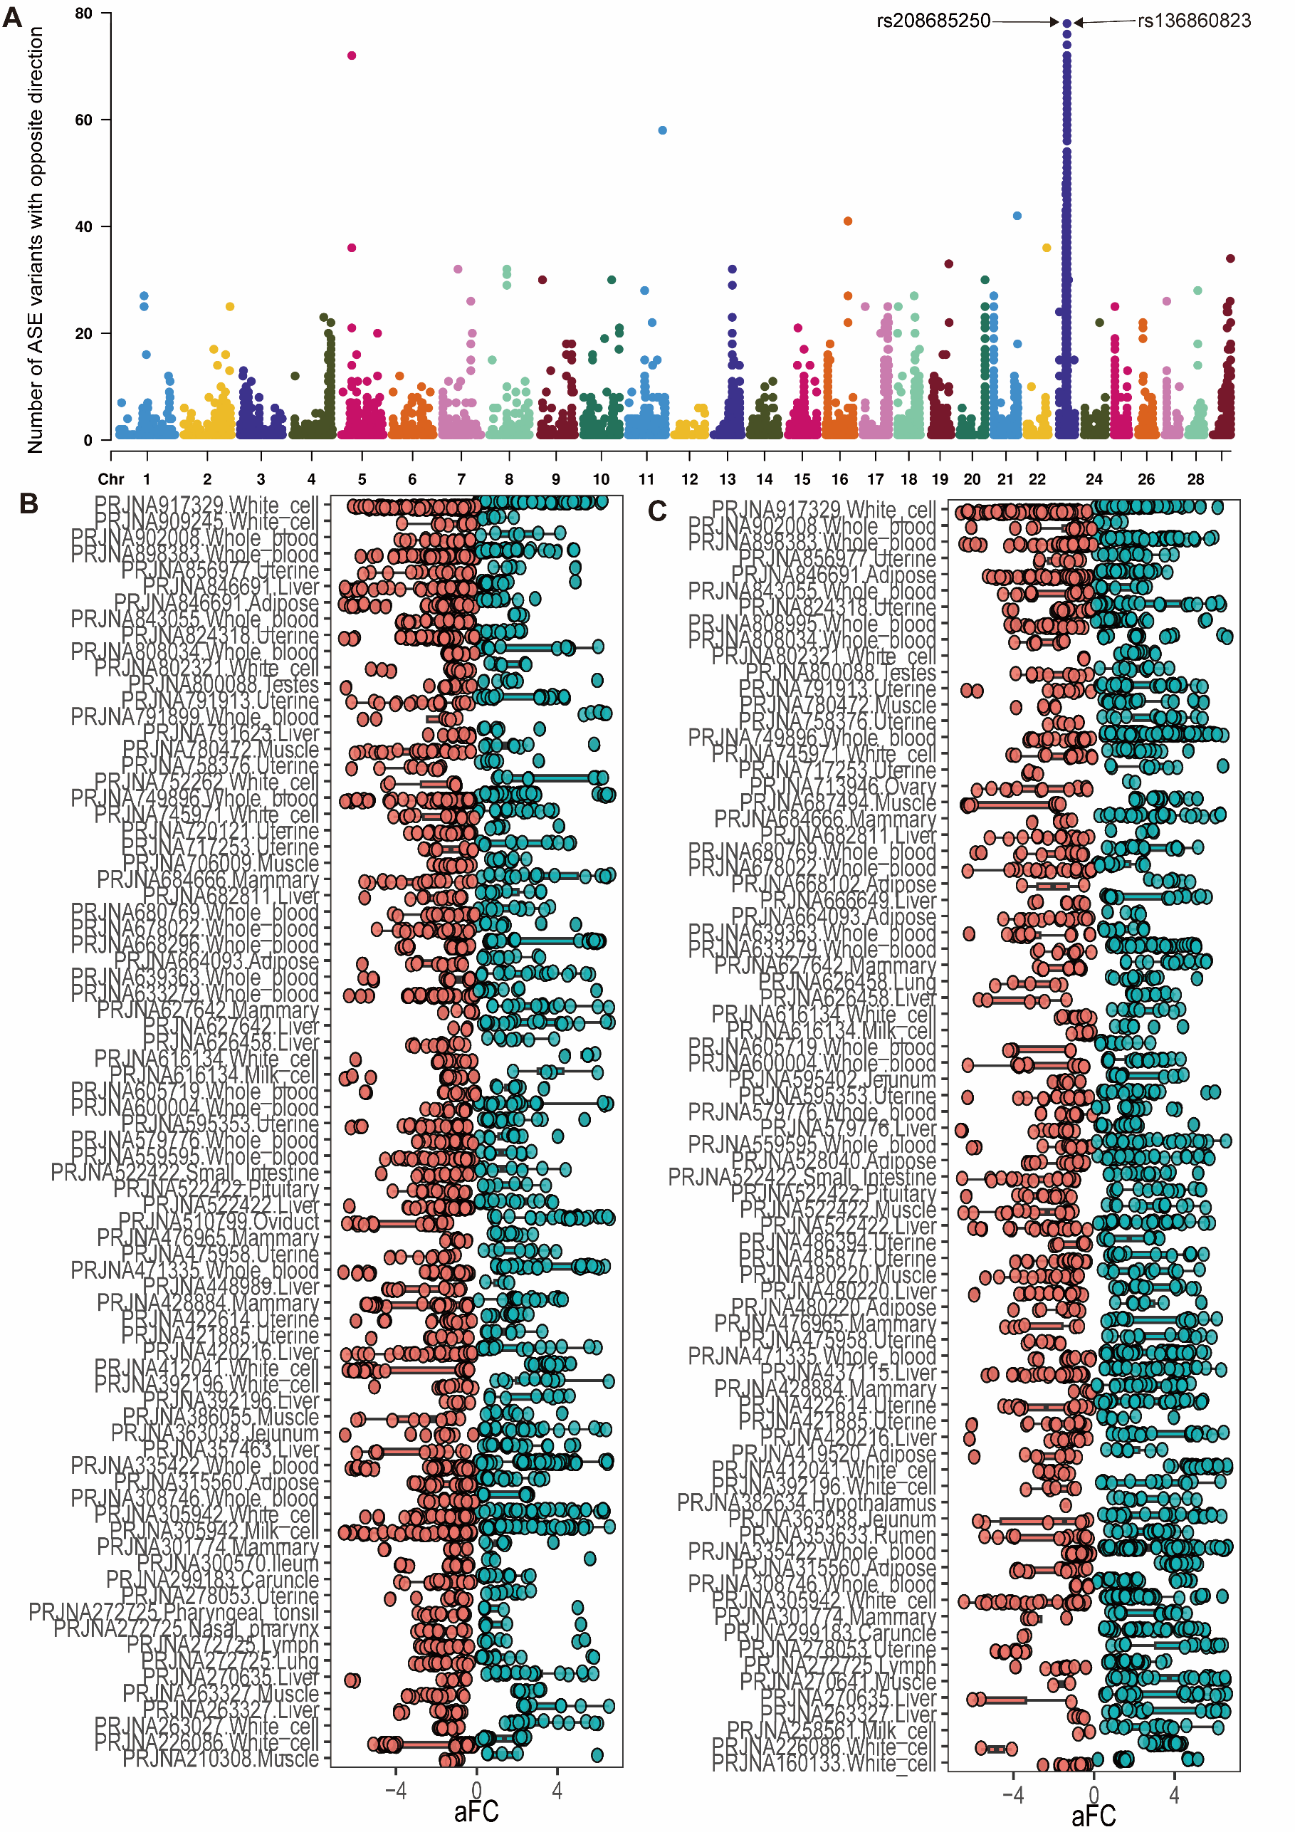


**Fig. S10 ASE variants with opposite effects.** **A.** Manhattan plot showing the distribution of the number of subsets for each variant with opposite ASE directionality. **B.** Effect sizes of the ASE variant rs136860823 in individual samples. **C.** Effect sizes of the ASE variant rs208685250 in individual samples.


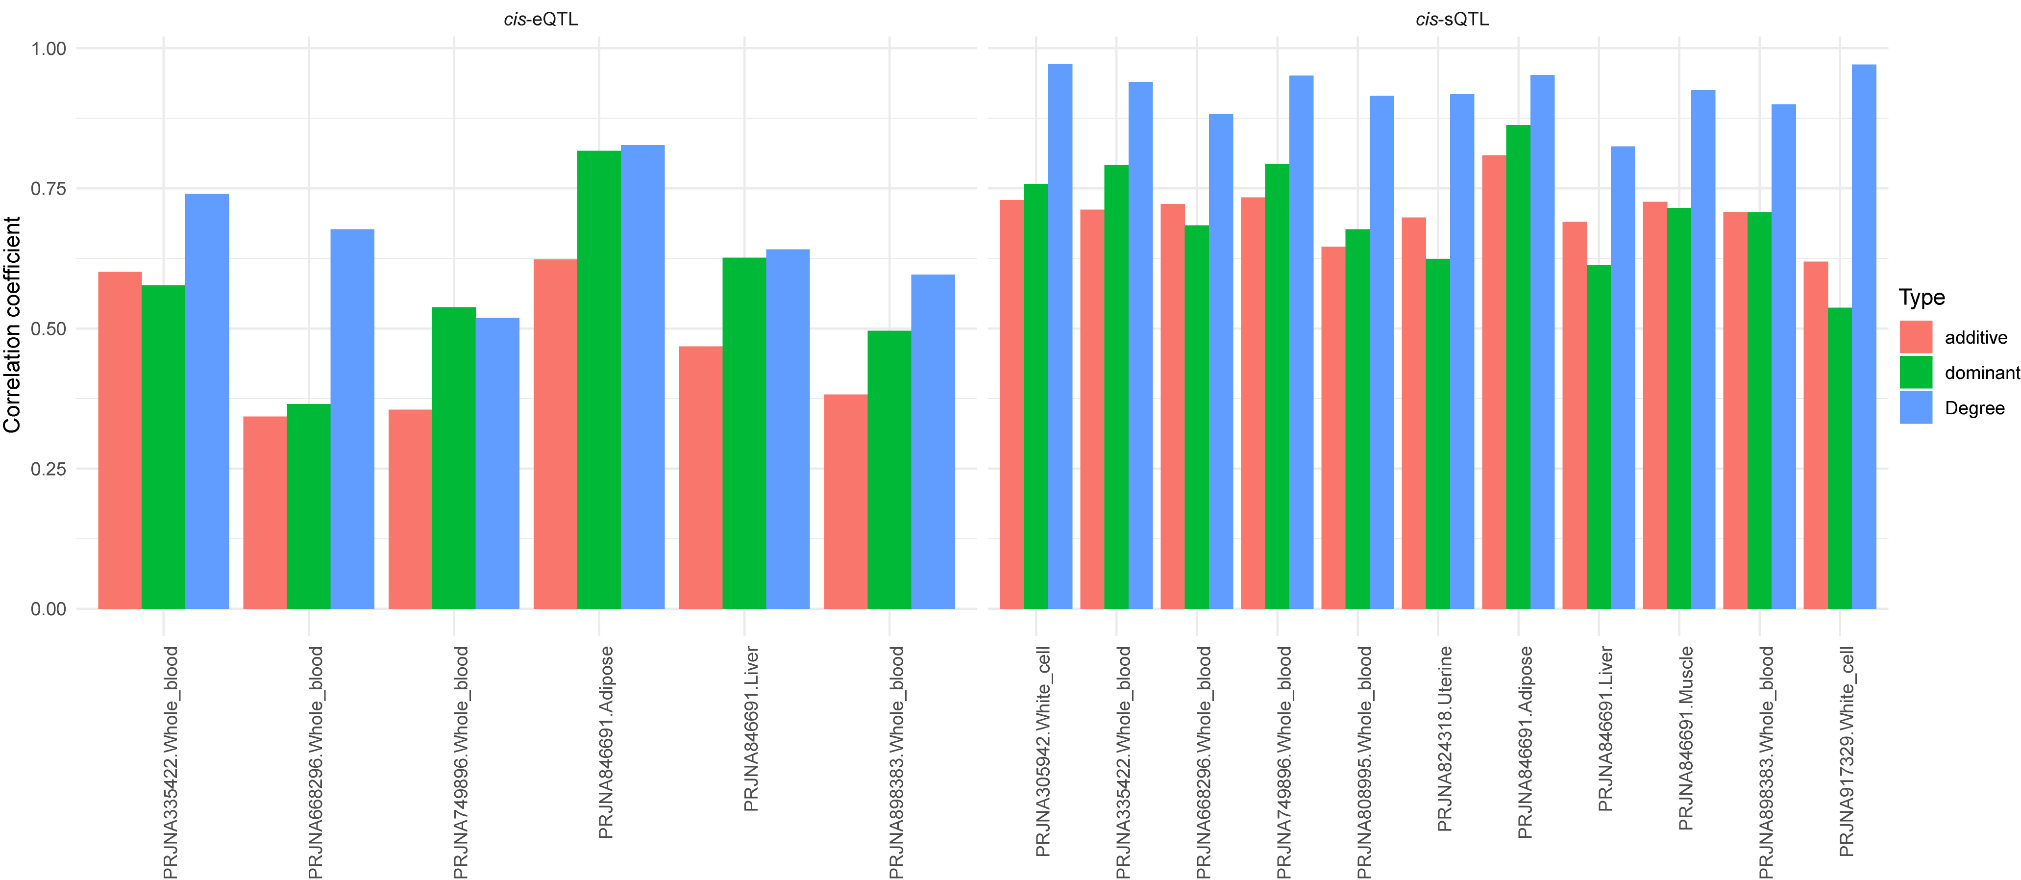


**Fig. S11 Bar plots showing the Pearson correlation coefficient between the effect size of ASE variants and the additive effect, dominant effect, and degree of dominance in *cis*-eQTL variants (left) and *cis*-sQTL variants (right)**. Only comparisons involving 12 or more ASE variants shared with *cis*-eQTL/*cis*-sQTL variants are included. Correlations are shown only when the relationships between ASE variants and the additive effect, dominant effect, and are simultaneously significant (*P* < 0.001).


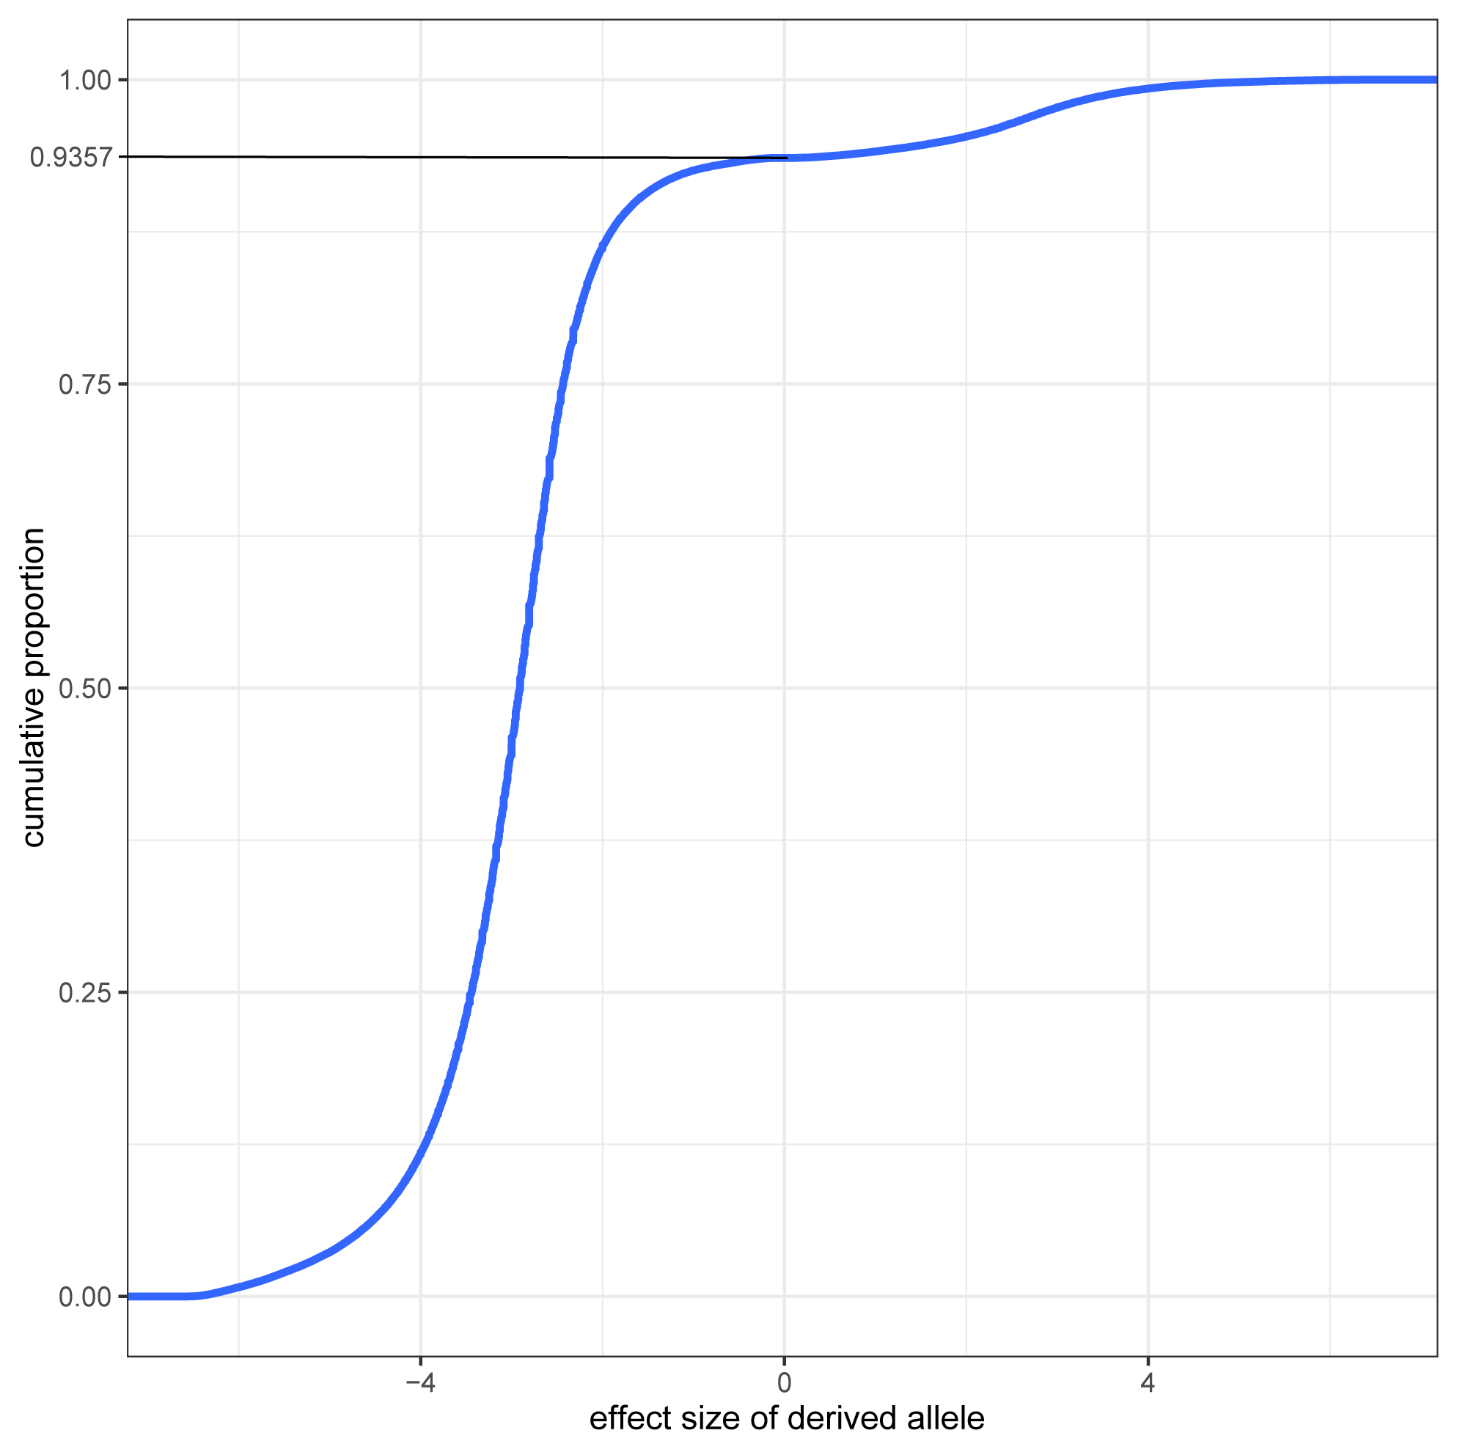


**Fig. S12 Cumulative proportion plot of the effect size (|log2(aFC)|) of derived alleles in ASE variants.**

**Table S1 Summary of RNA-seq data** (see Excel for detailed data).

**Table S2 Gene Ontology (GO) analysis of genes lacking ASE variants (FDR<0.001).**

| Category | Term | Count | PValue | FDR |
| --- | --- | --- | --- | --- |
| GOTERM_MF_DIRECT | GO:0000981~RNA polymerase II transcription factor activity, sequence-specific DNA binding | 374 | 4.65E-32 | 7.85E-29 |
| GOTERM_MF_DIRECT | GO:0000978~RNA polymerase II core promoter proximal region sequence-specific DNA binding | 361 | 2.00E-23 | 1.69E-20 |
| GOTERM_CC_DIRECT | GO:0045095~keratin filament | 74 | 1.34E-22 | 1.12E-19 |
| GOTERM_CC_DIRECT | GO:0005576~extracellular region | 345 | 3.77E-21 | 1.57E-18 |
| GOTERM_MF_DIRECT | GO:0005125~cytokine activity | 100 | 7.83E-19 | 4.41E-16 |
| GOTERM_CC_DIRECT | GO:0005615~extracellular space | 435 | 2.03E-18 | 5.66E-16 |
| GOTERM_MF_DIRECT | GO:0005132~type I interferon receptor binding | 46 | 4.18E-18 | 1.77E-15 |
| GOTERM_BP_DIRECT | GO:0033141~positive regulation of peptidyl-serine phosphorylation of STAT protein | 48 | 1.42E-17 | 7.07E-14 |
| GOTERM_BP_DIRECT | GO:0002323~natural killer cell activation involved in immune response | 46 | 1.54E-16 | 3.83E-13 |
| GOTERM_BP_DIRECT | GO:0006952~defense response | 54 | 7.71E-16 | 1.28E-12 |
| GOTERM_BP_DIRECT | GO:0006357~regulation of transcription from RNA polymerase II promoter | 408 | 1.46E-15 | 1.81E-12 |
| GOTERM_BP_DIRECT | GO:0007601~visual perception | 62 | 1.83E-15 | 1.82E-12 |
| GOTERM_BP_DIRECT | GO:0002286~T cell activation involved in immune response | 46 | 2.46E-15 | 2.04E-12 |
| GOTERM_BP_DIRECT | GO:0043330~response to exogenous dsRNA | 48 | 6.40E-15 | 4.55E-12 |
| GOTERM_CC_DIRECT | GO:0001669~acrosomal vesicle | 42 | 1.44E-13 | 3.01E-11 |
| GOTERM_BP_DIRECT | GO:0006959~humoral immune response | 50 | 5.42E-14 | 3.37E-11 |
| GOTERM_MF_DIRECT | GO:0001594~trace-amine receptor activity | 21 | 1.80E-13 | 6.10E-11 |
| GOTERM_BP_DIRECT | GO:0042100~B cell proliferation | 48 | 8.08E-13 | 4.47E-10 |
| GOTERM_BP_DIRECT | GO:0007218~neuropeptide signaling pathway | 46 | 3.27E-12 | 1.63E-09 |
| GOTERM_MF_DIRECT | GO:0000977~RNA polymerase II regulatory region sequence-specific DNA binding | 87 | 9.49E-12 | 2.67E-09 |
| GOTERM_BP_DIRECT | GO:0030183~B cell differentiation | 54 | 6.54E-12 | 2.71E-09 |
| GOTERM_BP_DIRECT | GO:0009891~positive regulation of biosynthetic process | 54 | 6.54E-12 | 2.71E-09 |
| GOTERM_MF_DIRECT | GO:0005126~cytokine receptor binding | 31 | 1.48E-11 | 3.57E-09 |
| GOTERM_BP_DIRECT | GO:0050909~sensory perception of taste | 28 | 9.59E-12 | 3.67E-09 |
| GOTERM_BP_DIRECT | GO:0031424~keratinization | 34 | 1.46E-11 | 5.19E-09 |
| GOTERM_MF_DIRECT | GO:0004252~serine-type endopeptidase activity | 80 | 4.08E-10 | 7.93E-08 |
| GOTERM_MF_DIRECT | GO:0005515~protein binding | 574 | 4.23E-10 | 7.93E-08 |
| GOTERM_CC_DIRECT | GO:0043005~neuron projection | 94 | 5.17E-10 | 8.63E-08 |
| GOTERM_MF_DIRECT | GO:0030280~structural constituent of epidermis | 26 | 1.15E-09 | 1.94E-07 |
| GOTERM_BP_DIRECT | GO:0045109~intermediate filament organization | 42 | 8.70E-10 | 2.89E-07 |
| GOTERM_BP_DIRECT | GO:0001580~detection of chemical stimulus involved in sensory perception of bitter taste | 26 | 2.10E-09 | 6.51E-07 |
| GOTERM_BP_DIRECT | GO:0030317~flagellated sperm motility | 37 | 2.22E-09 | 6.51E-07 |
| GOTERM_CC_DIRECT | GO:0036126~sperm flagellum | 30 | 5.94E-09 | 8.26E-07 |
| GOTERM_MF_DIRECT | GO:0033038~bitter taste receptor activity | 16 | 5.64E-08 | 8.66E-06 |
| GOTERM_MF_DIRECT | GO:0001228~transcriptional activator activity, RNA polymerase II transcription regulatory region sequence-specific binding | 119 | 1.05E-07 | 1.48E-05 |
| GOTERM_MF_DIRECT | GO:0008083~growth factor activity | 55 | 1.39E-07 | 1.81E-05 |
| GOTERM_CC_DIRECT | GO:0031514~motile cilium | 36 | 3.17E-07 | 3.79E-05 |
| GOTERM_MF_DIRECT | GO:0042923~neuropeptide binding | 17 | 3.81E-07 | 4.60E-05 |
| GOTERM_CC_DIRECT | GO:0045202~synapse | 103 | 4.57E-07 | 4.77E-05 |
| GOTERM_BP_DIRECT | GO:0006508~proteolysis | 170 | 1.91E-07 | 5.27E-05 |
| GOTERM_BP_DIRECT | GO:0007200~phospholipase C-activating G-protein coupled receptor signaling pathway | 35 | 4.32E-07 | 1.13E-04 |
| GOTERM_MF_DIRECT | GO:0001227~transcriptional repressor activity, RNA polymerase II transcription regulatory region sequence-specific binding | 97 | 1.35E-06 | 1.53E-04 |
| GOTERM_BP_DIRECT | GO:0007189~adenylate cyclase-activating G-protein coupled receptor signaling pathway | 51 | 1.41E-06 | 3.51E-04 |
| GOTERM_CC_DIRECT | GO:0045211~postsynaptic membrane | 51 | 4.12E-06 | 3.82E-04 |
| GOTERM_MF_DIRECT | GO:0005509~calcium ion binding | 179 | 8.78E-06 | 9.28E-04 |

**Table S3 Functional classification of detected ASE variants.**

| Functional classification | Fold enrichment | backgroundTotal | backgroundRegion | ASETotal | ASEregion |
| --- | --- | --- | --- | --- | --- |
| intronic | 0.417592 | 2134383 | 1256380 | 161059 | 39590 |
| ncRNA_intronic | 0.557535 | 2134383 | 309 | 161059 | 13 |
| intergenic | 1.286865 | 2134383 | 281157 | 161059 | 27302 |
| upstream | 1.129539 | 2134383 | 14818 | 161059 | 1263 |
| upstream;downstream | 1.444823 | 2134383 | 1385 | 161059 | 151 |
| downstream | 1.544612 | 2134383 | 43104 | 161059 | 5024 |
| UTR5 | 1.542336 | 2134383 | 43391 | 161059 | 5050 |
| splicing | 2.103925 | 2134383 | 3647 | 161059 | 579 |
| ncRNA_exonic | 2.981286 | 2134383 | 729 | 161059 | 164 |
| UTR3 | 1.951129 | 2134383 | 244453 | 161059 | 35991 |
| exonic | 2.482634 | 2134383 | 244665 | 161059 | 45835 |
| UTR5;UTR3 | 2.7537 | 2134383 | 231 | 161059 | 48 |
| exonic;splicing | 5.903244 | 2134383 | 110 | 161059 | 49 |
| nonsynonymous SNV | 10.94408 | 2134383 | 109676 | 161059 | 90574 |
| synonymous SNV | 6.395756 | 2134383 | 128820 | 161059 | 62171 |
| stopgain | 11.66847 | 2134383 | 1456 | 161059 | 1282 |
| stoploss | 6.19323 | 2134383 | 199 | 161059 | 93 |

**Table S4 Gene Ontology (GO) analysis of genes with ASE variants exhibiting opposite directionality (FDR < 0.001).**

| Category | Term | Count | PValue | FDR |
| --- | --- | --- | --- | --- |
| GOTERM_CC_DIRECT | GO:0005829~cytosol | 716 | 1.46E-35 | 1.42E-32 |
| GOTERM_CC_DIRECT | GO:0005737~cytoplasm | 959 | 1.04E-22 | 5.08E-20 |
| GOTERM_CC_DIRECT | GO:0005615~extracellular space | 410 | 3.61E-20 | 1.17E-17 |
| GOTERM_MF_DIRECT | GO:0042802~identical protein binding | 219 | 4.05E-16 | 8.76E-13 |
| GOTERM_CC_DIRECT | GO:0005576~extracellular region | 281 | 2.40E-14 | 5.85E-12 |
| GOTERM_CC_DIRECT | GO:0005783~endoplasmic reticulum | 197 | 2.13E-12 | 4.15E-10 |
| GOTERM_CC_DIRECT | GO:0042470~melanosome | 40 | 3.06E-12 | 4.96E-10 |
| GOTERM_BP_DIRECT | GO:0045087~innate immune response | 117 | 9.65E-14 | 5.39E-10 |
| GOTERM_MF_DIRECT | GO:0004867~serine-type endopeptidase inhibitor activity | 62 | 2.41E-12 | 1.86E-09 |
| GOTERM_MF_DIRECT | GO:0051015~actin filament binding | 81 | 2.58E-12 | 1.86E-09 |
| GOTERM_BP_DIRECT | GO:0006956~complement activation | 21 | 7.11E-13 | 1.99E-09 |
| GOTERM_BP_DIRECT | GO:0010951~negative regulation of endopeptidase activity | 35 | 1.74E-11 | 3.24E-08 |
| GOTERM_MF_DIRECT | GO:0005524~ATP binding | 340 | 5.75E-10 | 3.11E-07 |
| GOTERM_BP_DIRECT | GO:0006958~complement activation, classical pathway | 25 | 4.78E-10 | 6.67E-07 |
| GOTERM_BP_DIRECT | GO:0006955~immune response | 108 | 1.15E-09 | 1.28E-06 |
| GOTERM_CC_DIRECT | GO:0070062~extracellular exosome | 48 | 1.40E-08 | 1.87E-06 |
| GOTERM_CC_DIRECT | GO:0005739~mitochondrion | 241 | 1.54E-08 | 1.87E-06 |
| GOTERM_MF_DIRECT | GO:0005178~integrin binding | 46 | 7.08E-09 | 3.06E-06 |
| GOTERM_CC_DIRECT | GO:0009897~external side of plasma membrane | 119 | 4.08E-08 | 4.41E-06 |
| GOTERM_CC_DIRECT | GO:0031902~late endosome membrane | 45 | 6.63E-08 | 6.33E-06 |
| GOTERM_CC_DIRECT | GO:0005654~nucleoplasm | 362 | 7.16E-08 | 6.33E-06 |
| GOTERM_BP_DIRECT | GO:0045214~sarcomere organization | 21 | 8.00E-09 | 6.52E-06 |
| GOTERM_BP_DIRECT | GO:0006953~acute-phase response | 16 | 8.17E-09 | 6.52E-06 |
| GOTERM_CC_DIRECT | GO:0030027~lamellipodium | 48 | 8.21E-08 | 6.66E-06 |
| GOTERM_MF_DIRECT | GO:0042803~protein homodimerization activity | 126 | 3.29E-08 | 1.19E-05 |
| GOTERM_CC_DIRECT | GO:0030018~Z disc | 38 | 2.12E-07 | 1.59E-05 |
| GOTERM_BP_DIRECT | GO:0032760~positive regulation of tumor necrosis factor production | 29 | 2.64E-08 | 1.84E-05 |
| GOTERM_BP_DIRECT | GO:0002381~immunoglobulin production involved in immunoglobulin-mediated immune response | 18 | 3.37E-08 | 2.09E-05 |
| GOTERM_BP_DIRECT | GO:0050729~positive regulation of inflammatory response | 29 | 4.32E-08 | 2.41E-05 |
| GOTERM_MF_DIRECT | GO:0003779~actin binding | 62 | 9.07E-08 | 2.50E-05 |
| GOTERM_MF_DIRECT | GO:0002020~protease binding | 29 | 9.29E-08 | 2.50E-05 |
| GOTERM_MF_DIRECT | GO:0005200~structural constituent of cytoskeleton | 28 | 1.04E-07 | 2.50E-05 |
| GOTERM_BP_DIRECT | GO:0050870~positive regulation of T cell activation | 24 | 5.15E-08 | 2.61E-05 |
| GOTERM_CC_DIRECT | GO:0034364~high-density lipoprotein particle | 14 | 4.78E-07 | 3.32E-05 |
| GOTERM_MF_DIRECT | GO:0005525~GTP binding | 110 | 1.67E-07 | 3.60E-05 |
| GOTERM_MF_DIRECT | GO:0005509~calcium ion binding | 164 | 2.42E-07 | 4.76E-05 |
| GOTERM_CC_DIRECT | GO:0045121~membrane raft | 42 | 9.55E-07 | 5.96E-05 |
| GOTERM_CC_DIRECT | GO:0009986~cell surface | 98 | 9.80E-07 | 5.96E-05 |
| GOTERM_MF_DIRECT | GO:0023026~MHC class II protein complex binding | 19 | 4.02E-07 | 7.25E-05 |
| GOTERM_BP_DIRECT | GO:0098609~cell-cell adhesion | 55 | 1.93E-07 | 9.00E-05 |
| GOTERM_CC_DIRECT | GO:0015629~actin cytoskeleton | 53 | 1.65E-06 | 9.12E-05 |
| GOTERM_CC_DIRECT | GO:0005765~lysosomal membrane | 71 | 1.69E-06 | 9.12E-05 |
| GOTERM_BP_DIRECT | GO:0007565~female pregnancy | 19 | 2.28E-07 | 9.79E-05 |
| GOTERM_CC_DIRECT | GO:0005789~endoplasmic reticulum membrane | 168 | 4.60E-06 | 2.36E-04 |
| GOTERM_BP_DIRECT | GO:0007596~blood coagulation | 26 | 6.07E-07 | 2.42E-04 |
| GOTERM_BP_DIRECT | GO:0030036~actin cytoskeleton organization | 49 | 7.68E-07 | 2.86E-04 |
| GOTERM_BP_DIRECT | GO:0019886~antigen processing and presentation of exogenous peptide antigen via MHC class II | 20 | 9.02E-07 | 3.15E-04 |
| GOTERM_CC_DIRECT | GO:0016607~nuclear speck | 81 | 6.65E-06 | 3.23E-04 |
| GOTERM_BP_DIRECT | GO:0002503~peptide antigen assembly with MHC class II protein complex | 18 | 1.53E-06 | 4.79E-04 |
| GOTERM_BP_DIRECT | GO:0050766~positive regulation of phagocytosis | 21 | 1.54E-06 | 4.79E-04 |
| GOTERM_BP_DIRECT | GO:0030593~neutrophil chemotaxis | 29 | 1.91E-06 | 5.60E-04 |
| GOTERM_BP_DIRECT | GO:0007160~cell-matrix adhesion | 29 | 2.73E-06 | 7.63E-04 |

**Table S5 Summary statistics of ASE variants overlapping with eQTL and sQTL variants.**

| Subset | ASE number | SNP number | Additive eQTL number | ASE number overlapped in Additive eQTL | Dominant eQTL number | ASE number overlapped in Dominant eQTL | Additive sQTL number | ASE number overlapped in Additive sQTL | Dominant sQTL number | ASE number overlapped in Dominant sQTL | Additive eQTL fold enrichment | Dominant eQTL fold eneichment | Additive sQTL fold enrichment | Dominant sQTL fold eneichment |
| --- | --- | --- | --- | --- | --- | --- | --- | --- | --- | --- | --- | --- | --- | --- |
| PRJNA226086.White_cell | 2405 | 404329 | 4092 | 16 | 3086 | 18 | 2054 | 5 | 3151 | 10 | 0.6574 | 0.9806 | 0.4093 | 0.5335 |
| PRJNA3059.42.Milk_cell | 1029 | 206690 | 6593 | 16 | 1607 | 5 | 11671 | 22 | 6185 | 10 | 0.4875 | 0.6250 | 0.3786 | 0.3248 |
| PRJNA305942.White_cell | 2806 | 393268 | 55244 | 227 | 15050 | 90 | 72242 | 309 | 28466 | 182 | 0.5759 | 0.8381 | 0.5995 | 0.8961 |
| PRJNA335422.Whole_blood | 18045 | 903022 | 186426 | 797 | 116913 | 540 | 238359 | 1100 | 36897 | 354 | 0.2139 | 0.2311 | 0.2309 | 0.4801 |
| PRJNA387572.Fetus | 690 | 121479 | 417 | 0 | 347 | 0 | 1529 | 0 | 1129 | 0 | 0.0000 | 0.0000 | 0.0000 | 0.0000 |
| PRJNA437115.Liver | 1170 | 299886 | 19123 | 77 | 2519 | 28 | 14849 | 74 | 4616 | 30 | 1.0321 | 2.8491 | 1.2773 | 1.6658 |
| PRJNA471335.Whole_blood | 5731 | 774501 | 31684 | 213 | 14513 | 82 | 65049 | 610 | 40748 | 498 | 0.9085 | 0.7636 | 1.2673 | 1.6516 |
| PRJNA563691.Retinal | 450 | 152931 | 164 | 0 | 342 | 0 | 1057 | 0 | 1339 | 2 | 0.0000 | 0.0000 | 0.0000 | 0.5076 |
| PRJNA663348.Lung | 3948 | 136005 | 5522 | 25 | 1172 | 5 | 974 | 4 | 378 | 5 | 0.1560 | 0.1470 | 0.1415 | 0.4557 |
| PRJNA663348.Whole_blood | 4101 | 136626 | 8734 | 20 | 1681 | 6 | 1315 | 8 | 735 | 2 | 0.0763 | 0.1189 | 0.2027 | 0.0907 |
| PRJNA668296.Whole_blood | 13312 | 955490 | 118177 | 659 | 51560 | 460 | 176962 | 947 | 92777 | 764 | 0.4003 | 0.6404 | 0.3841 | 0.5911 |
| PRJNA749896.Whole_blood | 5357 | 657692 | 315589 | 622 | 110276 | 436 | 291606 | 678 | 128111 | 532 | 0.2420 | 0.4854 | 0.2855 | 0.5098 |
| PRJNA808995.Whole_blood | 9733 | 1528302 | 151779 | 310 | 76399 | 147 | 84361 | 432 | 57483 | 302 | 0.3207 | 0.3021 | 0.8041 | 0.8250 |
| PRJNA824318.Uterine | 6038 | 3397930 | 110997 | 145 | 36297 | 46 | 375496 | 371 | 220710 | 263 | 0.7352 | 0.7132 | 0.5560 | 0.6706 |
| PRJNA846691.Adipose | 4280 | 829900 | 40637 | 153 | 10609 | 55 | 96727 | 215 | 42029 | 89 | 0.7300 | 1.0052 | 0.4310 | 0.4106 |
| PRJNA846691.Liver | 6221 | 625005 | 73105 | 361 | 18311 | 135 | 113895 | 540 | 48970 | 322 | 0.4961 | 0.7407 | 0.4763 | 0.6606 |
| PRJNA846691.Muscle | 2090 | 543403 | 59013 | 52 | 20102 | 30 | 95116 | 106 | 41123 | 53 | 0.2291 | 0.3880 | 0.2898 | 0.3351 |
| PRJNA898383.Whole_blood | 12496 | 959229 | 157296 | 888 | 40382 | 423 | 278919 | 1386 | 104900 | 978 | 0.4334 | 0.8041 | 0.3814 | 0.7157 |
| PRJNA917329.White_cell | 23148 | 831146 | 171890 | 788 | 48040 | 466 | 218853 | 989 | 93958 | 640 | 0.1646 | 0.3483 | 0.1623 | 0.2446 |

**Table S6** Summary of ATAC-seq data for peak calling (see Excel for detailed data).

**Table S7** Summary of ChIP-seq data for peak calling (see Excel for detailed data).

**Table S8** Descriptive summary of SNP associations with milk-related traits using a mixed linear model.

| Chr | Position | ID | BioProject.tissue | ASE aFC | Gene.refGene | Trait | Additive Beta | Additive Se | Additive P | Dominant Beta | Dominant Se | Dominant P |
| --- | --- | --- | --- | --- | --- | --- | --- | --- | --- | --- | --- | --- |
| 3 | 14164001 | rs379828158 | PRJNA767623.Kidney | 1.031909248 | NES | proteinYield | 248.0948 | 5.68E+01 | 1.27E-05 | 226.344 | 4.23E+01 | 8.90E-08 |
| 3 | 14164001 | rs379828158 | PRJNA767623.Kidney | 1.031909248 | NES | totalSolids | 56.00771 | 1.35E+01 | 3.16E-05 | 50.256 | 1.00E+01 | 5.33E-07 |
| 3 | 19502467 | rs110687635 | PRJNA909245.White_cell | 5.327926836 | PI4KB | lactosePercentage | -4.09E-02 | 8.24E-03 | 7.15E-07 | 4.18E-02 | 8.76E-03 | 1.86E-06 |
| 3 | 54109833 | rs109733519 | PRJNA745971.White_cell | 1.800230488 | GBP5 | Yield | 8.99E-01 | 1.32E-01 | 8.83E-12 | -4.93E-01 | 1.76E-01 | 5.07E-03 |
| 5 | 30565090 | 5:30565090 | PRJNA371462.Granulosa | -2.74723393 | TUBA1C | Yield | 7.84E-01 | 1.28E-01 | 1.08E-09 | -9.45E-01 | 1.76E-01 | 8.22E-08 |
| 5 | 30565090 | 5:30565090 | PRJNA670731.Fetus | -3.308752706 | TUBA1C | Yield | 7.84E-01 | 1.28E-01 | 1.08E-09 | -9.45E-01 | 1.76E-01 | 8.22E-08 |
| 5 | 30565090 | 5:30565090 | PRJNA758376.Uterine | -2.321928095 | TUBA1C | Yield | 7.84E-01 | 1.28E-01 | 1.08E-09 | -9.45E-01 | 1.76E-01 | 8.22E-08 |
| 5 | 30565090 | 5:30565090 | PRJNA791913.Uterine | -1.769880217 | TUBA1C | Yield | 7.84E-01 | 1.28E-01 | 1.08E-09 | -9.45E-01 | 1.76E-01 | 8.22E-08 |
| 5 | 30565090 | 5:30565090 | PRJNA803503.Skin | -2.807354922 | TUBA1C | Yield | 7.84E-01 | 1.28E-01 | 1.08E-09 | -9.45E-01 | 1.76E-01 | 8.22E-08 |
| 5 | 33999477 | rs110768052 | PRJNA767623.Kidney | -1.244887059 | SLC38A1 | totalSolids | 8.44E-02 | 1.63E-02 | 2.23E-07 | -0.04101445 | 0.02259909 | 0.06957966 |
| 5 | 75357461 | rs207628090 | PRJNA301774.Mammary | 0.491340867 | CSF2RB | fatYield | -3.04E-01 | 5.82E-02 | 1.72E-07 | 2.49E-02 | 7.81E-02 | 7.50E-01 |
| 5 | 75357461 | rs207628090 | PRJNA301774.Mammary | 0.491340867 | CSF2RB | totalSolids | -9.51E-02 | 1.70E-02 | 2.44E-08 | -0.01228296 | 0.02285171 | 0.59093165 |
| 5 | 75357461 | rs207628090 | PRJNA616134.Milk_cell | -4.255257055 | CSF2RB | fatYield | -3.04E-01 | 5.82E-02 | 1.72E-07 | 2.49E-02 | 7.81E-02 | 7.50E-01 |
| 5 | 75357461 | rs207628090 | PRJNA616134.Milk_cell | -4.255257055 | CSF2RB | totalSolids | -9.51E-02 | 1.70E-02 | 2.44E-08 | -0.01228296 | 0.02285171 | 0.59093165 |
| 5 | 75358547 | rs211512253 | PRJNA616134.Milk_cell | -4.19480659 | CSF2RB | fatPercentage | -6.18E-02 | 1.23E-02 | 5.80E-07 | 1.42E-02 | 1.63E-02 | 3.84E-01 |
| 5 | 75358547 | rs211512253 | PRJNA616134.Milk_cell | -4.19480659 | CSF2RB | fatYield | -3.15E-01 | 5.93E-02 | 1.08E-07 | 8.74E-02 | 7.85E-02 | 2.65E-01 |
| 5 | 75358547 | rs211512253 | PRJNA616134.Milk_cell | -4.19480659 | CSF2RB | totalSolids | -1.02E-01 | 1.74E-02 | 5.07E-09 | 7.66E-03 | 2.30E-02 | 7.39E-01 |
| 5 | 75371136 | rs109759917 | PRJNA301774.Mammary | 0.810707689 | CSF2RB | fatPercentage | -6.56E-02 | 1.23E-02 | 1.01E-07 | 2.48E-02 | 1.64E-02 | 1.31E-01 |
| 5 | 75371136 | rs109759917 | PRJNA301774.Mammary | 0.810707689 | CSF2RB | fatYield | -3.31E-01 | 5.92E-02 | 2.35E-08 | 1.32E-01 | 7.87E-02 | 9.35E-02 |
| 5 | 75371136 | rs109759917 | PRJNA301774.Mammary | 0.810707689 | CSF2RB | totalSolids | -1.06E-01 | 1.73E-02 | 8.44E-10 | 1.89E-02 | 2.30E-02 | 4.13E-01 |
| 5 | 75371136 | rs109759917 | PRJNA305942.Milk_cell | -2.092902581 | CSF2RB | fatPercentage | -6.56E-02 | 1.23E-02 | 1.01E-07 | 2.48E-02 | 1.64E-02 | 1.31E-01 |
| 5 | 75371136 | rs109759917 | PRJNA305942.Milk_cell | -2.092902581 | CSF2RB | fatYield | -3.31E-01 | 5.92E-02 | 2.35E-08 | 1.32E-01 | 7.87E-02 | 9.35E-02 |
| 5 | 75371136 | rs109759917 | PRJNA305942.Milk_cell | -2.092902581 | CSF2RB | totalSolids | -1.06E-01 | 1.73E-02 | 8.44E-10 | 1.89E-02 | 2.30E-02 | 4.13E-01 |
| 5 | 75371136 | rs109759917 | PRJNA308746.Whole_blood | 0.661313387 | CSF2RB | fatPercentage | -6.56E-02 | 1.23E-02 | 1.01E-07 | 2.48E-02 | 1.64E-02 | 1.31E-01 |
| 5 | 75371136 | rs109759917 | PRJNA308746.Whole_blood | 0.661313387 | CSF2RB | fatYield | -3.31E-01 | 5.92E-02 | 2.35E-08 | 1.32E-01 | 7.87E-02 | 9.35E-02 |
| 5 | 75371136 | rs109759917 | PRJNA308746.Whole_blood | 0.661313387 | CSF2RB | totalSolids | -1.06E-01 | 1.73E-02 | 8.44E-10 | 1.89E-02 | 2.30E-02 | 4.13E-01 |
| 5 | 75371136 | rs109759917 | PRJNA559595.Whole_blood | 0.704224193 | CSF2RB | fatPercentage | -6.56E-02 | 1.23E-02 | 1.01E-07 | 2.48E-02 | 1.64E-02 | 1.31E-01 |
| 5 | 75371136 | rs109759917 | PRJNA559595.Whole_blood | 0.704224193 | CSF2RB | fatYield | -3.31E-01 | 5.92E-02 | 2.35E-08 | 1.32E-01 | 7.87E-02 | 9.35E-02 |
| 5 | 75371136 | rs109759917 | PRJNA559595.Whole_blood | 0.704224193 | CSF2RB | totalSolids | -1.06E-01 | 1.73E-02 | 8.44E-10 | 1.89E-02 | 2.30E-02 | 4.13E-01 |
| 5 | 75371136 | rs109759917 | PRJNA605719.Whole_blood | 0.750021747 | CSF2RB | fatPercentage | -6.56E-02 | 1.23E-02 | 1.01E-07 | 2.48E-02 | 1.64E-02 | 1.31E-01 |
| 5 | 75371136 | rs109759917 | PRJNA605719.Whole_blood | 0.750021747 | CSF2RB | fatYield | -3.31E-01 | 5.92E-02 | 2.35E-08 | 1.32E-01 | 7.87E-02 | 9.35E-02 |
| 5 | 75371136 | rs109759917 | PRJNA605719.Whole_blood | 0.750021747 | CSF2RB | totalSolids | -1.06E-01 | 1.73E-02 | 8.44E-10 | 1.89E-02 | 2.30E-02 | 4.13E-01 |
| 5 | 75371136 | rs109759917 | PRJNA616134.Milk_cell | -3.302638924 | CSF2RB | fatPercentage | -6.56E-02 | 1.23E-02 | 1.01E-07 | 2.48E-02 | 1.64E-02 | 1.31E-01 |
| 5 | 75371136 | rs109759917 | PRJNA616134.Milk_cell | -3.302638924 | CSF2RB | fatYield | -3.31E-01 | 5.92E-02 | 2.35E-08 | 1.32E-01 | 7.87E-02 | 9.35E-02 |
| 5 | 75371136 | rs109759917 | PRJNA616134.Milk_cell | -3.302638924 | CSF2RB | totalSolids | -1.06E-01 | 1.73E-02 | 8.44E-10 | 1.89E-02 | 2.30E-02 | 4.13E-01 |
| 5 | 75371136 | rs109759917 | PRJNA616134.White_cell | -3.700439718 | CSF2RB | fatPercentage | -6.56E-02 | 1.23E-02 | 1.01E-07 | 2.48E-02 | 1.64E-02 | 1.31E-01 |
| 5 | 75371136 | rs109759917 | PRJNA616134.White_cell | -3.700439718 | CSF2RB | fatYield | -3.31E-01 | 5.92E-02 | 2.35E-08 | 1.32E-01 | 7.87E-02 | 9.35E-02 |
| 5 | 75371136 | rs109759917 | PRJNA616134.White_cell | -3.700439718 | CSF2RB | totalSolids | -1.06E-01 | 1.73E-02 | 8.44E-10 | 1.89E-02 | 2.30E-02 | 4.13E-01 |
| 5 | 75798567 | rs208514810 | PRJNA626458.Brain | -1.667424661 | ELFN2 | Yield | 1.299698 | 1.71E-01 | 3.04E-14 | -1.310168 | 2.00E-01 | 6.15E-11 |
| 5 | 95028489 | rs41256890 | PRJNA486394.Uterine | -0.732304217 | MGP | fatPercentage | 8.20E-02 | 1.19E-02 | 7.16E-12 | -0.0256238 | 0.01609351 | 0.11138167 |
| 5 | 95028489 | rs41256890 | PRJNA486394.Uterine | -0.732304217 | MGP | fatYield | 3.30E-01 | 5.74E-02 | 9.28E-09 | -0.11901662 | 0.07735018 | 0.12392225 |
| 5 | 95028489 | rs41256890 | PRJNA486394.Uterine | -0.732304217 | MGP | totalSolids | 1.05E-01 | 1.68E-02 | 3.64E-10 | -0.0531352 | 0.02264156 | 0.0189588 |
| 5 | 95028489 | rs41256890 | PRJNA717253.Uterine | -0.938984225 | MGP | fatPercentage | 8.20E-02 | 1.19E-02 | 7.16E-12 | -0.0256238 | 0.01609351 | 0.11138167 |
| 5 | 95028489 | rs41256890 | PRJNA717253.Uterine | -0.938984225 | MGP | fatYield | 3.30E-01 | 5.74E-02 | 9.28E-09 | -0.11901662 | 0.07735018 | 0.12392225 |
| 5 | 95028489 | rs41256890 | PRJNA717253.Uterine | -0.938984225 | MGP | totalSolids | 1.05E-01 | 1.68E-02 | 3.64E-10 | -0.0531352 | 0.02264156 | 0.0189588 |
| 5 | 95028489 | rs41256890 | PRJNA844972.Uterine | -0.282826242 | MGP | fatPercentage | 8.20E-02 | 1.19E-02 | 7.16E-12 | -0.0256238 | 0.01609351 | 0.11138167 |
| 5 | 95028489 | rs41256890 | PRJNA844972.Uterine | -0.282826242 | MGP | fatYield | 3.30E-01 | 5.74E-02 | 9.28E-09 | -0.11901662 | 0.07735018 | 0.12392225 |
| 5 | 95028489 | rs41256890 | PRJNA844972.Uterine | -0.282826242 | MGP | totalSolids | 1.05E-01 | 1.68E-02 | 3.64E-10 | -0.0531352 | 0.02264156 | 0.0189588 |
| 5 | 110951329 | rs210149671 | PRJNA791913.Uterine | -1.464403577 | RPS19BP1 | fatPercentage | -1.95479 | 2.44E-01 | 1.44E-15 | -0.2754367 | 0.1904907 | 0.148234 |
| 5 | 110951329 | rs210149671 | PRJNA791913.Uterine | -1.464403577 | RPS19BP1 | fatYield | -16.43833 | 2.26E+00 | 3.94E-13 | -1.4792541 | 1.7614042 | 0.4010361 |
| 5 | 112345380 | rs382454350 | PRJNA600538.Fetus | -1.538419915 | EP300 | Yield | 0.4582245 | 0.8866664 | 0.6053133 | 1.080535 | 1.84E-01 | 4.73E-09 |
| 5 | 117102808 | rs209807729 | PRJNA917329.White_cell | -2.285402219 | TBC1D22A | totalSolids | 7.785766 | 1.20E+00 | 1.05E-10 | 7.575716 | 1.19E+00 | 2.10E-10 |
| 6 | 85451298 | rs43703011 | PRJNA258561.Milk_cell | -0.152431334 | CSN2 | proteinYield | -3.99E+02 | 7.23E+01 | 3.47E-08 | -3.89E+02 | 7.22E+01 | 7.08E-08 |
| 6 | 85451298 | rs43703011 | PRJNA258561.Milk_cell | -0.152431334 | CSN2 | totalSolids | -1.30E+02 | 1.71E+01 | 4.10E-14 | -1.27E+02 | 1.71E+01 | 8.94E-14 |
| 6 | 85451298 | rs43703011 | PRJNA301774.Mammary | -0.092879365 | CSN2 | proteinYield | -3.99E+02 | 7.23E+01 | 3.47E-08 | -3.89E+02 | 7.22E+01 | 7.08E-08 |
| 6 | 85451298 | rs43703011 | PRJNA301774.Mammary | -0.092879365 | CSN2 | totalSolids | -1.30E+02 | 1.71E+01 | 4.10E-14 | -1.27E+02 | 1.71E+01 | 8.94E-14 |
| 6 | 85451298 | rs43703011 | PRJNA305942.Milk_cell | -0.461580085 | CSN2 | proteinYield | -3.99E+02 | 7.23E+01 | 3.47E-08 | -3.89E+02 | 7.22E+01 | 7.08E-08 |
| 6 | 85451298 | rs43703011 | PRJNA305942.Milk_cell | -0.461580085 | CSN2 | totalSolids | -1.30E+02 | 1.71E+01 | 4.10E-14 | -1.27E+02 | 1.71E+01 | 8.94E-14 |
| 6 | 85451298 | rs43703011 | PRJNA392196.White_cell | 1.128075334 | CSN2 | proteinYield | -3.99E+02 | 7.23E+01 | 3.47E-08 | -3.89E+02 | 7.22E+01 | 7.08E-08 |
| 6 | 85451298 | rs43703011 | PRJNA392196.White_cell | 1.128075334 | CSN2 | totalSolids | -1.30E+02 | 1.71E+01 | 4.10E-14 | -1.27E+02 | 1.71E+01 | 8.94E-14 |
| 6 | 85451298 | rs43703011 | PRJNA616134.Milk_cell | -1.64485987 | CSN2 | proteinYield | -3.99E+02 | 7.23E+01 | 3.47E-08 | -3.89E+02 | 7.22E+01 | 7.08E-08 |
| 6 | 85451298 | rs43703011 | PRJNA616134.Milk_cell | -1.64485987 | CSN2 | totalSolids | -1.30E+02 | 1.71E+01 | 4.10E-14 | -1.27E+02 | 1.71E+01 | 8.94E-14 |
| 6 | 85451298 | rs43703011 | PRJNA616134.White_cell | 0.972519264 | CSN2 | proteinYield | -3.99E+02 | 7.23E+01 | 3.47E-08 | -3.89E+02 | 7.22E+01 | 7.08E-08 |
| 6 | 85451298 | rs43703011 | PRJNA616134.White_cell | 0.972519264 | CSN2 | totalSolids | -1.30E+02 | 1.71E+01 | 4.10E-14 | -1.27E+02 | 1.71E+01 | 8.94E-14 |
| 6 | 85451298 | rs43703011 | PRJNA684666.Mammary | -0.366481399 | CSN2 | proteinYield | -3.99E+02 | 7.23E+01 | 3.47E-08 | -3.89E+02 | 7.22E+01 | 7.08E-08 |
| 6 | 85451298 | rs43703011 | PRJNA684666.Mammary | -0.366481399 | CSN2 | totalSolids | -1.30E+02 | 1.71E+01 | 4.10E-14 | -1.27E+02 | 1.71E+01 | 8.94E-14 |
| 6 | 85451298 | rs43703011 | PRJNA917329.White_cell | -0.899606196 | CSN2 | proteinYield | -3.99E+02 | 7.23E+01 | 3.47E-08 | -3.89E+02 | 7.22E+01 | 7.08E-08 |
| 6 | 85451298 | rs43703011 | PRJNA917329.White_cell | -0.899606196 | CSN2 | totalSolids | -1.30E+02 | 1.71E+01 | 4.10E-14 | -1.27E+02 | 1.71E+01 | 8.94E-14 |
| 6 | 85658795 | rs135796226 | PRJNA258561.Milk_cell | -0.783130344 | CSN3 | fatPercentage | -3.17E-02 | 6.39E-03 | 6.97E-07 | 2.47E-02 | 8.38E-03 | 3.17E-03 |
| 6 | 85658795 | rs135796226 | PRJNA301774.Mammary | -0.810967187 | CSN3 | fatPercentage | -3.17E-02 | 6.39E-03 | 6.97E-07 | 2.47E-02 | 8.38E-03 | 3.17E-03 |
| 6 | 85658795 | rs135796226 | PRJNA305942.Milk_cell | -3.216922481 | CSN3 | fatPercentage | -3.17E-02 | 6.39E-03 | 6.97E-07 | 2.47E-02 | 8.38E-03 | 3.17E-03 |
| 6 | 85658795 | rs135796226 | PRJNA392196.White_cell | 0.963566371 | CSN3 | fatPercentage | -3.17E-02 | 6.39E-03 | 6.97E-07 | 2.47E-02 | 8.38E-03 | 3.17E-03 |
| 6 | 85658795 | rs135796226 | PRJNA616134.Milk_cell | -1.950611973 | CSN3 | fatPercentage | -3.17E-02 | 6.39E-03 | 6.97E-07 | 2.47E-02 | 8.38E-03 | 3.17E-03 |
| 6 | 85658795 | rs135796226 | PRJNA627642.Mammary | -0.838486746 | CSN3 | fatPercentage | -3.17E-02 | 6.39E-03 | 6.97E-07 | 2.47E-02 | 8.38E-03 | 3.17E-03 |
| 6 | 85658795 | rs135796226 | PRJNA684666.Mammary | -0.727097608 | CSN3 | fatPercentage | -3.17E-02 | 6.39E-03 | 6.97E-07 | 2.47E-02 | 8.38E-03 | 3.17E-03 |
| 6 | 85658795 | rs135796226 | PRJNA917329.White_cell | -2.346413904 | CSN3 | fatPercentage | -3.17E-02 | 6.39E-03 | 6.97E-07 | 2.47E-02 | 8.38E-03 | 3.17E-03 |
| 6 | 85658825 | rs134221650 | PRJNA301774.Mammary | -0.794761605 | CSN3 | fatPercentage | -3.06E-02 | 6.00E-03 | 3.50E-07 | -1.37E-03 | 8.34E-03 | 8.70E-01 |
| 6 | 85658825 | rs134221650 | PRJNA616134.Milk_cell | -1.218756668 | CSN3 | fatPercentage | -3.06E-02 | 6.00E-03 | 3.50E-07 | -1.37E-03 | 8.34E-03 | 8.70E-01 |
| 6 | 85658825 | rs134221650 | PRJNA627642.Mammary | -0.846682378 | CSN3 | fatPercentage | -3.06E-02 | 6.00E-03 | 3.50E-07 | -1.37E-03 | 8.34E-03 | 8.70E-01 |
| 6 | 85658825 | rs134221650 | PRJNA684666.Mammary | -0.75021806 | CSN3 | fatPercentage | -3.06E-02 | 6.00E-03 | 3.50E-07 | -1.37E-03 | 8.34E-03 | 8.70E-01 |
| 6 | 85658825 | rs134221650 | PRJNA917329.White_cell | -1.159860758 | CSN3 | fatPercentage | -3.06E-02 | 6.00E-03 | 3.50E-07 | -1.37E-03 | 8.34E-03 | 8.70E-01 |
| 8 | 37653863 | rs110061816 | PRJNA700850.Oocyte | -1.881737118 | DMAC1 | fatPercentage | 0.05197335 | 6.46E-03 | 1.01E-15 | -0.04039255 | 8.38E-03 | 1.47E-06 |
| 8 | 37653863 | rs110061816 | PRJNA700850.Oocyte | -1.881737118 | DMAC1 | fatYield | 0.4442215 | 5.98E-02 | 1.18E-13 | -0.4486156 | 7.74E-02 | 7.19E-09 |
| 8 | 37653863 | rs110061816 | PRJNA700850.Oocyte | -1.881737118 | DMAC1 | totalSolids | 0.1286812 | 1.75E-02 | 2.13E-13 | -0.132714 | 2.27E-02 | 5.00E-09 |
| 11 | 103257950 | rs110066229 | PRJNA258561.Milk_cell | -1.957376506 | PAEP | Yield | -8.664887 | 1.58E+00 | 4.39E-08 | -8.401944 | 1.58E+00 | 1.01E-07 |
| 11 | 103257950 | rs110066229 | PRJNA301774.Mammary | -0.613437063 | PAEP | Yield | -8.664887 | 1.58E+00 | 4.39E-08 | -8.401944 | 1.58E+00 | 1.01E-07 |
| 11 | 103257950 | rs110066229 | PRJNA305942.Milk_cell | -0.723804217 | PAEP | Yield | -8.664887 | 1.58E+00 | 4.39E-08 | -8.401944 | 1.58E+00 | 1.01E-07 |
| 11 | 103257950 | rs110066229 | PRJNA428884.Mammary | -1.325622578 | PAEP | Yield | -8.664887 | 1.58E+00 | 4.39E-08 | -8.401944 | 1.58E+00 | 1.01E-07 |
| 11 | 103257950 | rs110066229 | PRJNA616134.Milk_cell | -2.559818282 | PAEP | Yield | -8.664887 | 1.58E+00 | 4.39E-08 | -8.401944 | 1.58E+00 | 1.01E-07 |
| 11 | 103257950 | rs110066229 | PRJNA627642.Mammary | 0.180226379 | PAEP | Yield | -8.664887 | 1.58E+00 | 4.39E-08 | -8.401944 | 1.58E+00 | 1.01E-07 |
| 11 | 103257950 | rs110066229 | PRJNA684666.Mammary | -2.051131658 | PAEP | Yield | -8.664887 | 1.58E+00 | 4.39E-08 | -8.401944 | 1.58E+00 | 1.01E-07 |
| 11 | 103257950 | rs110066229 | PRJNA917329.White_cell | -1.722006262 | PAEP | Yield | -8.664887 | 1.58E+00 | 4.39E-08 | -8.401944 | 1.58E+00 | 1.01E-07 |
| 14 | 553130 | rs210909150 | PRJNA909245.White_cell | -2.266786541 | CPSF1 | fatPercentage | 0.06706125 | 7.53E-03 | 6.27E-19 | -0.06271415 | 9.05E-03 | 4.45E-12 |
| 14 | 553130 | rs210909150 | PRJNA909245.White_cell | -2.266786541 | CPSF1 | fatYield | 1.098621 | 6.89E-02 | 1.91E-56 | -1.106606 | 8.30E-02 | 3.78E-40 |
| 14 | 553130 | rs210909150 | PRJNA909245.White_cell | -2.266786541 | CPSF1 | totalSolids | 0.5078895 | 7.44E-02 | 9.56E-12 | -0.4521765 | 8.94E-02 | 4.34E-07 |
| 14 | 553130 | rs210909150 | PRJNA909245.White_cell | -2.266786541 | CPSF1 | Yield | -1.603748 | 1.58E-01 | 4.22E-24 | 1.437098 | 1.90E-01 | 4.26E-14 |
| 14 | 753895 | rs132650058 | PRJNA522422.Muscle | 2.378511623 | GPAA1 | fatPercentage | 0.1056335 | 1.25E-02 | 3.02E-17 | -0.05576577 | 1.61E-02 | 5.25E-04 |
| 14 | 753895 | rs132650058 | PRJNA522422.Muscle | 2.378511623 | GPAA1 | fatYield | 0.4241439 | 6.01E-02 | 1.77E-12 | -0.1757812 | 7.73E-02 | 2.30E-02 |
| 14 | 753895 | rs132650058 | PRJNA522422.Muscle | 2.378511623 | GPAA1 | totalSolids | 0.1285841 | 1.76E-02 | 2.83E-13 | -0.04774925 | 2.26E-02 | 3.49E-02 |
| 14 | 753895 | rs132650058 | PRJNA522422.Muscle | 2.378511623 | GPAA1 | Yield | -0.6861791 | 1.37E-01 | 5.26E-07 | 0.138505 | 0.1756887 | 0.4305117 |
| 14 | 753895 | rs132650058 | PRJNA633279.Whole_blood | 2.321928095 | GPAA1 | fatPercentage | 0.1056335 | 1.25E-02 | 3.02E-17 | -0.05576577 | 1.61E-02 | 5.25E-04 |
| 14 | 753895 | rs132650058 | PRJNA633279.Whole_blood | 2.321928095 | GPAA1 | fatYield | 0.4241439 | 6.01E-02 | 1.77E-12 | -0.1757812 | 7.73E-02 | 2.30E-02 |
| 14 | 753895 | rs132650058 | PRJNA633279.Whole_blood | 2.321928095 | GPAA1 | totalSolids | 0.1285841 | 1.76E-02 | 2.83E-13 | -0.04774925 | 2.26E-02 | 3.49E-02 |
| 14 | 753895 | rs132650058 | PRJNA633279.Whole_blood | 2.321928095 | GPAA1 | Yield | -0.6861791 | 1.37E-01 | 5.26E-07 | 0.138505 | 0.1756887 | 0.4305117 |
| 14 | 881667 | rs207865638 | PRJNA909245.White_cell | -2.144389909 | PLEC | fatPercentage | 0.04097271 | 6.93E-03 | 3.45E-09 | -0.04186139 | 8.55E-03 | 1.01E-06 |
| 14 | 881667 | rs207865638 | PRJNA909245.White_cell | -2.144389909 | PLEC | fatYield | 0.6941074 | 6.37E-02 | 1.90E-27 | -0.6697054 | 7.88E-02 | 2.35E-17 |
| 14 | 881667 | rs207865638 | PRJNA909245.White_cell | -2.144389909 | PLEC | totalSolids | 0.4272804 | 6.83E-02 | 4.27E-10 | -0.3174244 | 8.45E-02 | 1.72E-04 |
| 14 | 881667 | rs207865638 | PRJNA909245.White_cell | -2.144389909 | PLEC | Yield | -0.9929178 | 1.45E-01 | 9.21E-12 | 0.9237981 | 1.80E-01 | 2.78E-07 |
| 14 | 891052 | rs110948156 | PRJNA909245.White_cell | -1.35614381 | PLEC | fatPercentage | 0.040204 | 6.93E-03 | 6.76E-09 | -0.04053245 | 8.54E-03 | 2.10E-06 |
| 14 | 891052 | rs110948156 | PRJNA909245.White_cell | -1.35614381 | PLEC | fatYield | 0.6802401 | 6.37E-02 | 2.04E-26 | -0.646056 | 7.87E-02 | 2.62E-16 |
| 14 | 891052 | rs110948156 | PRJNA909245.White_cell | -1.35614381 | PLEC | totalSolids | 0.4215285 | 6.84E-02 | 7.31E-10 | -0.3074369 | 8.43E-02 | 2.68E-04 |
| 14 | 891052 | rs110948156 | PRJNA909245.White_cell | -1.35614381 | PLEC | Yield | -0.964444 | 1.45E-01 | 3.55E-11 | 0.8770117 | 1.79E-01 | 1.03E-06 |
| 14 | 895292 | rs209888314 | PRJNA626458.Placenta | -0.839145989 | PLEC | fatPercentage | 0.04066357 | 6.93E-03 | 4.57E-09 | -0.04131599 | 8.55E-03 | 1.37E-06 |
| 14 | 895292 | rs209888314 | PRJNA626458.Placenta | -0.839145989 | PLEC | fatYield | 0.6908293 | 6.37E-02 | 3.45E-27 | -0.663484 | 7.88E-02 | 4.45E-17 |
| 14 | 895292 | rs209888314 | PRJNA626458.Placenta | -0.839145989 | PLEC | totalSolids | 0.4252867 | 6.84E-02 | 5.20E-10 | -0.3137255 | 8.44E-02 | 2.04E-04 |
| 14 | 895292 | rs209888314 | PRJNA626458.Placenta | -0.839145989 | PLEC | Yield | -0.9848259 | 1.45E-01 | 1.37E-11 | 0.9097666 | 1.80E-01 | 4.15E-07 |
| 14 | 895915 | rs208183570 | PRJNA694189.Placenta | -0.393663848 | PLEC | fatPercentage | 0.04089535 | 6.93E-03 | 3.70E-09 | -0.04164736 | 8.54E-03 | 1.11E-06 |
| 14 | 895915 | rs208183570 | PRJNA694189.Placenta | -0.393663848 | PLEC | fatYield | 0.6903134 | 6.37E-02 | 3.64E-27 | -0.6624005 | 7.88E-02 | 4.77E-17 |
| 14 | 895915 | rs208183570 | PRJNA694189.Placenta | -0.393663848 | PLEC | totalSolids | 0.4299023 | 6.83E-02 | 3.33E-10 | -0.3206821 | 8.44E-02 | 1.45E-04 |
| 14 | 895915 | rs208183570 | PRJNA694189.Placenta | -0.393663848 | PLEC | Yield | -0.9755296 | 1.45E-01 | 2.10E-11 | 0.8952778 | 1.79E-01 | 6.21E-07 |
| 14 | 1030164 | rs385729725 | PRJNA791623.Liver | 1.299560282 | FAM83H | fatPercentage | -0.08394502 | 1.89E-02 | 9.36E-06 | 0.1047641 | 2.14E-02 | 9.85E-07 |
| 14 | 1035806 | rs209959640 | PRJNA767623.Kidney | 1.201633861 | FAM83H | fatPercentage | -0.0998737 | 1.24E-02 | 1.00E-15 | 0.04364014 | 1.64E-02 | 7.63E-03 |
| 14 | 1035806 | rs209959640 | PRJNA767623.Kidney | 1.201633861 | FAM83H | fatYield | -0.412565 | 5.97E-02 | 5.39E-12 | 0.14781106 | 0.07861072 | 0.06010331 |
| 14 | 1035806 | rs209959640 | PRJNA767623.Kidney | 1.201633861 | FAM83H | totalSolids | -0.1244633 | 1.75E-02 | 1.20E-12 | 0.06099579 | 2.30E-02 | 8.04E-03 |
| 14 | 1671580 | rs108952604 | PRJNA668102.Adipose | -1.961525852 | LYNX1 | fatPercentage | -0.1131297 | 1.18E-02 | 1.60E-21 | 0.04899933 | 1.62E-02 | 2.53E-03 |
| 14 | 1671580 | rs108952604 | PRJNA668102.Adipose | -1.961525852 | LYNX1 | fatYield | -0.4755903 | 5.70E-02 | 8.18E-17 | 0.19019972 | 0.07798051 | 0.01474599 |
| 14 | 1671580 | rs108952604 | PRJNA668102.Adipose | -1.961525852 | LYNX1 | totalSolids | -0.1528831 | 1.67E-02 | 5.76E-20 | 0.07548582 | 2.28E-02 | 9.46E-04 |
| 15 | 35157201 | rs207689152 | PRJNA335422.Whole_blood | -3.807354922 | NUCB2 | fatPercentage | 0.09416067 | 1.61E-02 | 5.39E-09 | -0.1208555 | 1.86E-02 | 8.08E-11 |
| 15 | 35157201 | rs207689152 | PRJNA335422.Whole_blood | -3.807354922 | NUCB2 | fatYield | 0.4227226 | 7.75E-02 | 5.06E-08 | -0.557772 | 8.93E-02 | 4.37E-10 |
| 15 | 35157201 | rs207689152 | PRJNA335422.Whole_blood | -3.807354922 | NUCB2 | totalSolids | 0.1485094 | 2.27E-02 | 6.09E-11 | -0.1842301 | 2.61E-02 | 1.89E-12 |
| 15 | 35157201 | rs207689152 | PRJNA422614.Uterine | -3.832890014 | NUCB2 | fatPercentage | 0.09416067 | 1.61E-02 | 5.39E-09 | -0.1208555 | 1.86E-02 | 8.08E-11 |
| 15 | 35157201 | rs207689152 | PRJNA422614.Uterine | -3.832890014 | NUCB2 | fatYield | 0.4227226 | 7.75E-02 | 5.06E-08 | -0.557772 | 8.93E-02 | 4.37E-10 |
| 15 | 35157201 | rs207689152 | PRJNA422614.Uterine | -3.832890014 | NUCB2 | totalSolids | 0.1485094 | 2.27E-02 | 6.09E-11 | -0.1842301 | 2.61E-02 | 1.89E-12 |
| 16 | 66279849 | rs207846761 | PRJNA489591.Muscle | -0.628905848 | IVNS1ABP | Yield | 0.9509814 | 1.35E-01 | 1.78E-12 | -0.3043431 | 1.77E-01 | 8.50E-02 |
| 20 | 31154055 | rs136432969 | PRJNA791623.Liver | -0.535493824 | NNT | fatPercentage | 9.00E-02 | 1.45E-02 | 6.25E-10 | -8.44E-02 | 1.69E-02 | 6.38E-07 |
| 20 | 31154055 | rs136432969 | PRJNA791623.Liver | -0.535493824 | NNT | fatYield | 3.76E-01 | 6.99E-02 | 7.40E-08 | -2.85E-01 | 8.15E-02 | 4.63E-04 |
| 20 | 31154055 | rs136432969 | PRJNA791623.Liver | -0.535493824 | NNT | totalSolids | 1.21E-01 | 2.05E-02 | 3.16E-09 | -9.70E-02 | 2.39E-02 | 4.83E-05 |
| 20 | 32031218 | rs132658574 | PRJNA791623.Liver | -4.419538892 | GHR | fatPercentage | -0.0725475 | 1.27E-02 | 1.30E-08 | 0.1180563 | 1.62E-02 | 3.70E-13 |
| 20 | 32031218 | rs132658574 | PRJNA791623.Liver | -4.419538892 | GHR | fatYield | -0.3570126 | 6.13E-02 | 5.83E-09 | 0.5227239 | 7.80E-02 | 2.20E-11 |
| 20 | 32031218 | rs132658574 | PRJNA791623.Liver | -4.419538892 | GHR | totalSolids | -0.09607678 | 1.79E-02 | 8.78E-08 | 0.1357667 | 2.29E-02 | 2.94E-09 |
| 20 | 33370159 | rs379806042 | PRJNA791623.Liver | 0.271710237 | C6 | fatPercentage | -0.4974075 | 7.92E-02 | 3.47E-10 | -0.4166669 | 7.81E-02 | 9.76E-08 |
| 20 | 33370159 | rs379806042 | PRJNA791623.Liver | 0.271710237 | C6 | fatYield | -3.97655 | 7.32E-01 | 5.69E-08 | -3.161556 | 7.22E-01 | 1.22E-05 |
| 21 | 7582228 | rs41641678 | PRJNA780472.Muscle | -5.803054785 | SYNM | fatPercentage | 8.46E-02 | 1.62E-02 | 1.90E-07 | -7.94E-02 | 1.81E-02 | 1.20E-05 |
| 21 | 7582228 | rs41641678 | PRJNA780472.Muscle | -5.803054785 | SYNM | totalSolids | 1.29E-01 | 2.28E-02 | 1.80E-08 | -1.23E-01 | 2.55E-02 | 1.45E-06 |
| 22 | 54326366 | rs208189354 | PRJNA600538.Fetus | 3.256339753 | SEC13 | fatPercentage | -7.79E-02 | 1.33E-02 | 4.74E-09 | 3.59E-02 | 1.62E-02 | 2.65E-02 |
| 22 | 54326366 | rs208189354 | PRJNA600538.Fetus | 3.256339753 | SEC13 | fatYield | -3.55E-01 | 6.39E-02 | 2.94E-08 | 2.09E-01 | 7.78E-02 | 7.08E-03 |
| 22 | 54326366 | rs208189354 | PRJNA600538.Fetus | 3.256339753 | SEC13 | totalSolids | -1.22E-01 | 1.87E-02 | 6.39E-11 | 7.18E-02 | 2.28E-02 | 1.62E-03 |
| 22 | 54326366 | rs208189354 | PRJNA616134.Milk_cell | -4.238404739 | SEC13 | fatPercentage | -7.79E-02 | 1.33E-02 | 4.74E-09 | 3.59E-02 | 1.62E-02 | 2.65E-02 |
| 22 | 54326366 | rs208189354 | PRJNA616134.Milk_cell | -4.238404739 | SEC13 | fatYield | -3.55E-01 | 6.39E-02 | 2.94E-08 | 2.09E-01 | 7.78E-02 | 7.08E-03 |
| 22 | 54326366 | rs208189354 | PRJNA616134.Milk_cell | -4.238404739 | SEC13 | totalSolids | -1.22E-01 | 1.87E-02 | 6.39E-11 | 7.18E-02 | 2.28E-02 | 1.62E-03 |
| 28 | 35638723 | rs109492835 | PRJNA682811.Liver | -0.619024337 | MBL1 | Yield | 7.11E-01 | 1.36E-01 | 1.89E-07 | -4.60E-01 | 1.76E-01 | 9.14E-03 |
| 28 | 35667623 | rs211145790 | PRJNA666649.Liver | -0.57924885 | MAT1A | Yield | 0.6976187 | 1.32E-01 | 1.27E-07 | -0.4544698 | 1.79E-01 | 1.10E-02 |
| 29 | 41786851 | rs134520577 | PRJNA315560.Adipose | -2.818161677 | LGALS12 | fatPercentage | 4.39E-02 | 8.24E-03 | 1.02E-07 | -3.09E-02 | 9.11E-03 | 7.03E-04 |
| 29 | 41786851 | rs134520577 | PRJNA315560.Adipose | -2.818161677 | LGALS12 | Yield | -9.06E-01 | 1.73E-01 | 1.69E-07 | 9.40E-01 | 1.91E-01 | 8.99E-07 |
| 29 | 41792511 | rs109528415 | PRJNA315560.Adipose | 2.058893689 | LGALS12 | fatPercentage | 4.98E-02 | 8.27E-03 | 1.70E-09 | -3.82E-02 | 9.13E-03 | 2.88E-05 |
| 29 | 41792511 | rs109528415 | PRJNA315560.Adipose | 2.058893689 | LGALS12 | fatYield | 3.98E-01 | 7.65E-02 | 1.97E-07 | -3.89E-01 | 8.43E-02 | 3.94E-06 |
| 29 | 41792511 | rs109528415 | PRJNA315560.Adipose | 2.058893689 | LGALS12 | totalSolids | 1.16E-01 | 2.24E-02 | 2.42E-07 | -1.05E-01 | 2.47E-02 | 2.01E-05 |
| 29 | 41792511 | rs109528415 | PRJNA315560.Adipose | 2.058893689 | LGALS12 | Yield | -1.10E+00 | 1.74E-01 | 2.85E-10 | 1.16E+00 | 1.91E-01 | 1.56E-09 |

**Table S9 Summary of whole genome sequencing data used to infer ancestral alleles (see Excel file for detailed data).**

**Table S10 Descriptive statistics of test-day traits.**

| Trait | Number |
| --- | --- |
| Yield | 8839 |
| Fat Percentage | 8839 |
| Fat Yield | 8839 |
| Protein Percentage | 8839 |
| Protein Yield | 8839 |
| Total Solids | 8628 |
| Lactose Percentage | 8839 |
| total Solids | 8622 |
| Urea Nitrogen | 8785 |

**Table S11 Descriptive statistics of fixed and random effects.**

| Effect | Categories | Number |
| --- | --- | --- |
| Parity | 1 | 2478 |
| 2 | 3539 |
| 3 | 1776 |
| 4 | 665 |
| 5 | 185 |
| >6 | 196 |
| Test Day | 1 | 232 |
| 2 | 471 |
| 3 | 504 |
| 4 | 460 |
| 5 | 465 |
| 6 | 461 |
| 7 | 399 |
| 8 | 356 |
| 9 | 306 |
| 10 | 273 |
| 11 | 630 |
| 12 | 562 |
| 13 | 463 |
| 14 | 428 |
| 15 | 398 |
| 16 | 409 |
| 17 | 217 |
| 18 | 340 |
| 19 | 208 |
| 20 | 250 |
| 21 | 234 |
| 22 | 219 |
| 23 | 186 |
| 24 | 174 |
| 25 | 194 |
| Milk Months | 0 | 484 |
| 1 | 715 |
| 10 | 614 |
| 11 | 476 |
| 2 | 764 |
| 3 | 745 |
| 4 | 787 |
| 5 | 816 |
| 6 | 848 |
| 7 | 869 |
| 8 | 869 |
| 9 | 852 |
| Herd | 5 | 1397 |
| 6 | 3469 |
| 7 | 3973 |
