# Supplementary material for: A multi-tissue atlas of allelic-specific expression reveals the characteristics, mechanisms, and relationship with dominant effects in cattle
Source: Research Square preprint supplement (doi:10.21203/rs.3.rs-5530951/v1), 2025-01-09
Supplement: Supplementary file 2 [file 3deac9dd7ebe8d2203981e18.xlsx]

## Sheet: Table S1
Run	BioSample	Organism	BioProject	orginalTissue	renameTissue	Breed	Sex	Age	totalReads	mappedReads	mappedRatio	totalBases	mappedBases
SRR500673,SRR500674	SAMN00998371	Bos_taurus	PRJNA167458	Cervix	Uterine	NA	NA	NA	18237579	17700974	0.970577	765578012	743116098
SRR500675,SRR500676	SAMN00998372	Bos_taurus	PRJNA167458	Cervix	Uterine	NA	NA	NA	16355471	15317921	0.936563	686365105	642833905
SRR500677,SRR500678,SRR500679	SAMN00998373	Bos_taurus	PRJNA167458	Cervix	Uterine	NA	NA	NA	19772302	18793497	0.950496	830371435	789279193
SRR500680,SRR500681	SAMN00998374	Bos_taurus	PRJNA167458	Cervix	Uterine	NA	NA	NA	19492483	18567262	0.952534	818279986	779472950
SRR500682,SRR500683,SRR500684	SAMN00998375	Bos_taurus	PRJNA167458	Cervix	Uterine	NA	NA	NA	36016743	34560745	0.959574	1512601252	1451462029
SRR500685,SRR500686	SAMN00998376	Bos_taurus	PRJNA167458	Cervix	Uterine	NA	NA	NA	17114967	16678448	0.974495	703599111	685580719
SRR500694,SRR500695	SAMN00998384	Bos_taurus	PRJNA167458	Cervix	Uterine	NA	NA	NA	20146885	19534267	0.969592	846071446	820348447
SRR500696,SRR500697	SAMN00998385	Bos_taurus	PRJNA167458	Cervix	Uterine	NA	NA	NA	29519212	28464831	0.964282	1239758496	1195476184
SRR1554858,SRR1554859,SRR1554860,SRR1554861,SRR1554862,SRR1554863,SRR1554864,SRR1554865	SAMN02999932	Bos_taurus	PRJNA258561	Milk_somatic_cell	Milk_cell	Holstein	NA	NA	49741773	49197809	0.989064	4662759171	4615277583
SRR1554866,SRR1554867,SRR1554868,SRR1554869,SRR1554870,SRR1554871	SAMN02999933	Bos_taurus	PRJNA258561	Milk_somatic_cell	Milk_cell	Holstein	NA	NA	32480309	32282947	0.993924	3125692840	3108414128
SRR1554872,SRR1554873,SRR1554874,SRR1554875,SRR1554876,SRR1554877	SAMN02999934	Bos_taurus	PRJNA258561	Milk_somatic_cell	Milk_cell	Holstein	NA	NA	35437503	35085061	0.990055	3405291716	3373908718
SRR1554879,SRR1554880,SRR1554881,SRR1554882,SRR1554883	SAMN02999936	Bos_taurus	PRJNA258561	Milk_somatic_cell	Milk_cell	Holstein	NA	NA	33290188	33000790	0.991307	3193097100	3168151910
SRR1554884,SRR1554885,SRR1554886,SRR1554887,SRR1554888,SRR1554889	SAMN02999937	Bos_taurus	PRJNA258561	Milk_somatic_cell	Milk_cell	Holstein	NA	NA	33322409	33072579	0.992503	3179930844	3158142884
SRR1554890,SRR1554891,SRR1554892,SRR1554893,SRR1554894,SRR1554895,SRR1554896,SRR1554897	SAMN02999938	Bos_taurus	PRJNA258561	Milk_somatic_cell	Milk_cell	Holstein	NA	NA	53222682	52775074	0.99159	5081668728	5043334965
SRR1554898,SRR1554899,SRR1554900,SRR1554901	SAMN02999939	Bos_taurus	PRJNA258561	Milk_somatic_cell	Milk_cell	Holstein	NA	NA	25489965	25309939	0.992937	2465645292	2449488308
SRR1554902,SRR1554903,SRR1554904,SRR1554905,SRR1554906	SAMN02999940	Bos_taurus	PRJNA258561	Milk_somatic_cell	Milk_cell	Holstein	NA	NA	32244548	32007956	0.992663	3086762334	3066957819
SRR1554907,SRR1554908,SRR1554909,SRR1554910,SRR1554911,SRR1554912	SAMN02999941	Bos_taurus	PRJNA258561	Milk_somatic_cell	Milk_cell	Holstein	NA	NA	40181446	39822560	0.991068	3817695892	3787369991
SRR1554913,SRR1554914,SRR1554915,SRR1554916	SAMN02999942	Bos_taurus	PRJNA258561	Milk_somatic_cell	Milk_cell	Holstein	NA	NA	24933847	24732171	0.991912	2360242948	2343473630
SRR1554917,SRR1554918,SRR1554919,SRR1554920	SAMN02999943	Bos_taurus	PRJNA258561	Milk_somatic_cell	Milk_cell	Holstein	NA	NA	25565045	25332049	0.990886	2433772949	2414117958
SRR1554921,SRR1554922,SRR1554923,SRR1554924,SRR1554925,SRR1554926,SRR1554927,SRR1554928,SRR1554929,SRR1554930	SAMN02999944	Bos_taurus	PRJNA258561	Milk_somatic_cell	Milk_cell	Holstein	NA	NA	59201870	58909152	0.995056	5699430183	5673912284
SRR1554931,SRR1554932,SRR1554933,SRR1554934,SRR1554935,SRR1554936,SRR1554937,SRR1554938,SRR1554939,SRR1554940	SAMN02999945	Bos_taurus	PRJNA258561	Milk_somatic_cell	Milk_cell	Holstein	NA	NA	63143315	62641063	0.992046	6051153589	6008499253
SRR1554942,SRR1554943,SRR1554944,SRR1554945	SAMN02999947	Bos_taurus	PRJNA258561	Milk_somatic_cell	Milk_cell	Holstein	NA	NA	26188622	26022724	0.993665	2537725150	2522907597
SRR1554946,SRR1554947,SRR1554948,SRR1554949	SAMN02999948	Bos_taurus	PRJNA258561	Milk_somatic_cell	Milk_cell	Holstein	NA	NA	27686853	27485439	0.992725	2641715643	2625010950
SRR1554951,SRR1554952,SRR1554953,SRR1554954,SRR1554955,SRR1554956	SAMN02999950	Bos_taurus	PRJNA258561	Milk_somatic_cell	Milk_cell	Holstein	NA	NA	33102017	32859575	0.992676	3176753224	3155557760
SRR2432423,SRR2432424,SRR2432425,SRR2432426,SRR2432427,SRR2432428,SRR2432429	SAMN04091477	Bos_taurus	PRJNA272725	Lung	Lung	Angus-Hereford	NA	not_collected	74564474	73765500	0.989285	3658059534	3619202090
SRR2432458,SRR2432459,SRR2432460,SRR2432461,SRR2432462,SRR2432463,SRR2432464	SAMN04091478	Bos_taurus	PRJNA272725	Lung	Lung	Angus-Hereford	NA	not_collected	78892990	78054520	0.989372	3868343608	3827602690
SRR2432493,SRR2432494,SRR2432495,SRR2432496,SRR2432497,SRR2432498,SRR2432499	SAMN04091479	Bos_taurus	PRJNA272725	Lung	Lung	Angus-Hereford	NA	not_collected	87794546	86863258	0.989392	4296293533	4251161088
SRR2432529,SRR2432530,SRR2432531,SRR2432532,SRR2432533,SRR2432534,SRR2432535	SAMN04091480	Bos_taurus	PRJNA272725	Lung	Lung	Angus-Hereford	NA	not_collected	75852440	75026226	0.989108	3703022523	3663124123
SRR2432564,SRR2432565,SRR2432566,SRR2432567,SRR2432568,SRR2432569,SRR2432570,SRR2432571	SAMN04091481	Bos_taurus	PRJNA272725	Lung	Lung	Angus-Hereford	NA	not_collected	125336372	124003014	0.989362	6228081517	6162549695
SRR2432601,SRR2432602,SRR2432603,SRR2432604,SRR2432605,SRR2432606,SRR2432607	SAMN04091482	Bos_taurus	PRJNA272725	Lung	Lung	Angus-Hereford	NA	not_collected	79317368	78231296	0.986307	3869863025	3817335842
SRR2432636,SRR2432637,SRR2432638,SRR2432639,SRR2432640,SRR2432641,SRR2432642	SAMN04091483	Bos_taurus	PRJNA272725	Lung	Lung	Angus-Hereford	NA	not_collected	73373416	72510198	0.988235	3586488728	3544721502
SRR2432671,SRR2432672,SRR2432673,SRR2432674,SRR2432675,SRR2432676,SRR2432677	SAMN04091484	Bos_taurus	PRJNA272725	Lung	Lung	Angus-Hereford	NA	not_collected	79672592	78787480	0.988891	3900984239	3858070087
SRR2432706,SRR2432707,SRR2432708,SRR2432709,SRR2432710,SRR2432711,SRR2432712	SAMN04091485	Bos_taurus	PRJNA272725	Lung	Lung	Angus-Hereford	NA	not_collected	61901206	61174140	0.988254	3026715730	2991549681
SRR2432741,SRR2432742,SRR2432743,SRR2432744,SRR2432745,SRR2432746,SRR2432747	SAMN04091486	Bos_taurus	PRJNA272725	Lung	Lung	Angus-Hereford	NA	not_collected	68816076	67969584	0.987699	3359953775	3319042248
SRR2432776,SRR2432777,SRR2432778,SRR2432779,SRR2432780,SRR2432781,SRR2432782	SAMN04091487	Bos_taurus	PRJNA272725	Lung	Lung	Angus-Hereford	NA	not_collected	103080534	101711580	0.98672	5038984327	4972649422
SRR2432811,SRR2432812,SRR2432813,SRR2432814,SRR2432815,SRR2432816,SRR2432817	SAMN04091488	Bos_taurus	PRJNA272725	Lung	Lung	Angus-Hereford	NA	not_collected	68376380	67541160	0.987785	3334333638	3294002962
SRR2432846,SRR2432847,SRR2432848,SRR2432849,SRR2432850,SRR2432851,SRR2432852	SAMN04091489	Bos_taurus	PRJNA272725	Lung	Lung	Angus-Hereford	NA	not_collected	62423414	61745120	0.989134	3048945747	3016177929
SRR2432881,SRR2432882,SRR2432883,SRR2432884,SRR2432885,SRR2432886,SRR2432887	SAMN04091490	Bos_taurus	PRJNA272725	Lung	Lung	Angus-Hereford	NA	not_collected	88141376	87146144	0.988709	4309280624	4261141598
SRR2432917,SRR2432918,SRR2432919,SRR2432920,SRR2432921,SRR2432922,SRR2432923	SAMN04091491	Bos_taurus	PRJNA272725	Lung	Lung	Angus-Hereford	NA	not_collected	107366900	106102396	0.988223	5246540053	5185333982
SRR2432953,SRR2432954,SRR2432955,SRR2432956,SRR2432957,SRR2432958,SRR2432959	SAMN04091492	Bos_taurus	PRJNA272725	Lung	Lung	Angus-Hereford	NA	not_collected	69388408	68413274	0.985947	3380963823	3333882652
SRR2432985,SRR2432986,SRR2432987,SRR2432988,SRR2432989,SRR2432990,SRR2432991	SAMN04091493	Bos_taurus	PRJNA272725	Lung	Lung	Angus-Hereford	NA	not_collected	105228204	104031438	0.988627	5143376067	5085449638
SRR2433021,SRR2433022,SRR2433023,SRR2433024,SRR2433025,SRR2433026,SRR2433027,SRR2433028	SAMN04091494	Bos_taurus	PRJNA272725	Lung	Lung	Angus-Hereford	NA	not_collected	90391496	89265606	0.987544	4468147286	4412970797
SRR2433058,SRR2433059,SRR2433060,SRR2433061,SRR2433062,SRR2433063,SRR2433064	SAMN04091495	Bos_taurus	PRJNA272725	Lung	Lung	Angus-Hereford	NA	not_collected	78455796	77443432	0.987096	3829985986	3781033815
SRR2433094,SRR2433095,SRR2433096,SRR2433097,SRR2433098,SRR2433099,SRR2433100	SAMN04091496	Bos_taurus	PRJNA272725	Lung	Lung	Angus-Hereford	NA	not_collected	71060344	70091058	0.98636	3466856097	3420005987
SRR2433129,SRR2433130,SRR2433131,SRR2433132,SRR2433133,SRR2433134,SRR2433135	SAMN04091497	Bos_taurus	PRJNA272725	Lung	Lung	Angus-Hereford	NA	not_collected	74411984	73489268	0.9876	3629123071	3584542693
SRR2433164,SRR2433165,SRR2433166,SRR2433167,SRR2433168,SRR2433169,SRR2433170	SAMN04091498	Bos_taurus	PRJNA272725	Lung	Lung	Angus-Hereford	NA	not_collected	78382240	77170566	0.984541	3829237095	3770453133
SRR2433199,SRR2433200,SRR2433201,SRR2433202,SRR2433203,SRR2433204,SRR2433205	SAMN04091499	Bos_taurus	PRJNA272725	Lung	Lung	Angus-Hereford	NA	not_collected	66617160	65637590	0.985296	3256257191	3208754390
SRR2432430,SRR2432431,SRR2432432,SRR2432433,SRR2432434,SRR2432435,SRR2432436	SAMN04091500	Bos_taurus	PRJNA272725	Lung_Lession	Lung	Angus-Hereford	NA	not_collected	79087194	78254624	0.989473	3864070071	3823858239
SRR2432465,SRR2432466,SRR2432467,SRR2432468,SRR2432469,SRR2432470,SRR2432471	SAMN04091501	Bos_taurus	PRJNA272725	Lung_Lession	Lung	Angus-Hereford	NA	not_collected	80512504	79549474	0.988039	3933031110	3886458775
SRR2432500,SRR2432501,SRR2432502,SRR2432503,SRR2432504,SRR2432505,SRR2432506	SAMN04091502	Bos_taurus	PRJNA272725	Lung_Lession	Lung	Angus-Hereford	NA	not_collected	69996464	69120236	0.987482	3416614342	3374293161
SRR2432536,SRR2432537,SRR2432538,SRR2432539,SRR2432540,SRR2432541,SRR2432542	SAMN04091503	Bos_taurus	PRJNA272725	Lung_Lession	Lung	Angus-Hereford	NA	not_collected	74704726	73810350	0.988028	3645354496	3602189921
SRR2432572,SRR2432573,SRR2432574,SRR2432575,SRR2432576,SRR2432577,SRR2432578	SAMN04091504	Bos_taurus	PRJNA272725	Lung_Lession	Lung	Angus-Hereford	NA	not_collected	63612852	62118078	0.976502	3104905883	3032346789
SRR2432608,SRR2432609,SRR2432610,SRR2432611,SRR2432612,SRR2432613,SRR2432614	SAMN04091505	Bos_taurus	PRJNA272725	Lung_Lession	Lung	Angus-Hereford	NA	not_collected	74160804	72704924	0.980369	3621547409	3550866240
SRR2432643,SRR2432644,SRR2432645,SRR2432646,SRR2432647,SRR2432648,SRR2432649	SAMN04091506	Bos_taurus	PRJNA272725	Lung_Lession	Lung	Angus-Hereford	NA	not_collected	86940168	85837492	0.987317	4243131886	4189890635
SRR2432678,SRR2432679,SRR2432680,SRR2432681,SRR2432682,SRR2432683,SRR2432684	SAMN04091507	Bos_taurus	PRJNA272725	Lung_Lession	Lung	Angus-Hereford	NA	not_collected	74811544	73232582	0.978894	3652575003	3575946162
SRR2432713,SRR2432714,SRR2432715,SRR2432716,SRR2432717,SRR2432718,SRR2432719	SAMN04091508	Bos_taurus	PRJNA272725	Lung_Lession	Lung	Angus-Hereford	NA	not_collected	67683610	66850472	0.987691	3306542472	3266301869
SRR2432748,SRR2432749,SRR2432750,SRR2432751,SRR2432752,SRR2432753,SRR2432754	SAMN04091509	Bos_taurus	PRJNA272725	Lung_Lession	Lung	Angus-Hereford	NA	not_collected	58784934	57885146	0.984694	2872496577	2828914452
SRR2432783,SRR2432784,SRR2432785,SRR2432786,SRR2432787,SRR2432788,SRR2432789	SAMN04091510	Bos_taurus	PRJNA272725	Lung_Lession	Lung	Angus-Hereford	NA	not_collected	86116144	84601290	0.982409	4203265209	4129860994
SRR2432818,SRR2432819,SRR2432820,SRR2432821,SRR2432822,SRR2432823,SRR2432824	SAMN04091511	Bos_taurus	PRJNA272725	Lung_Lession	Lung	Angus-Hereford	NA	not_collected	70986416	70061340	0.986968	3465776463	3421055920
SRR2432853,SRR2432854,SRR2432855,SRR2432856,SRR2432857,SRR2432858,SRR2432859	SAMN04091512	Bos_taurus	PRJNA272725	Lung_Lession	Lung	Angus-Hereford	NA	not_collected	104324034	102188736	0.979532	5102263192	4998515116
SRR2432888,SRR2432889,SRR2432890,SRR2432891,SRR2432892,SRR2432893,SRR2432894	SAMN04091513	Bos_taurus	PRJNA272725	Lung_Lession	Lung	Angus-Hereford	NA	not_collected	68269380	67490340	0.988589	3331441432	3293842114
SRR2432924,SRR2432925,SRR2432926,SRR2432927,SRR2432928,SRR2432929,SRR2432930	SAMN04091514	Bos_taurus	PRJNA272725	Lung_Lession	Lung	Angus-Hereford	NA	not_collected	73525872	72684806	0.988561	3587201673	3546619569
SRR2432960,SRR2432961,SRR2432962	SAMN04091515	Bos_taurus	PRJNA272725	Lung_Lession	Lung	Angus-Hereford	NA	not_collected	63322178	61993862	0.979023	3126431125	3061025623
SRR2432992,SRR2432993,SRR2432994,SRR2432995,SRR2432996,SRR2432997,SRR2432998	SAMN04091516	Bos_taurus	PRJNA272725	Lung_Lession	Lung	Angus-Hereford	NA	not_collected	65438888	64727624	0.989131	3192227020	3157927006
SRR2433029,SRR2433030,SRR2433031,SRR2433032,SRR2433033,SRR2433034,SRR2433035	SAMN04091517	Bos_taurus	PRJNA272725	Lung_Lession	Lung	Angus-Hereford	NA	not_collected	65813204	64982806	0.987383	3209028483	3168911405
SRR2433065,SRR2433066,SRR2433067,SRR2433068,SRR2433069,SRR2433070,SRR2433071	SAMN04091518	Bos_taurus	PRJNA272725	Lung_Lession	Lung	Angus-Hereford	NA	not_collected	76301114	75265056	0.986421	3724698483	3674555163
SRR2433101,SRR2433102,SRR2433103,SRR2433104,SRR2433105,SRR2433106,SRR2433107	SAMN04091519	Bos_taurus	PRJNA272725	Lung_Lession	Lung	Angus-Hereford	NA	not_collected	79854780	78781928	0.986565	3897406329	3845532397
SRR2433136,SRR2433137,SRR2433138,SRR2433139,SRR2433140,SRR2433141,SRR2433142	SAMN04091520	Bos_taurus	PRJNA272725	Lung_Lession	Lung	Angus-Hereford	NA	not_collected	72796738	71888982	0.98753	3551606351	3507765784
SRR2433171,SRR2433172,SRR2433173,SRR2433174,SRR2433175,SRR2433176,SRR2433177	SAMN04091521	Bos_taurus	PRJNA272725	Lung_Lession	Lung	Angus-Hereford	NA	not_collected	85576202	84598450	0.988574	4178622112	4131361030
SRR2433206,SRR2433207,SRR2433208,SRR2433209,SRR2433210,SRR2433211,SRR2433212	SAMN04091522	Bos_taurus	PRJNA272725	Lung_Lession	Lung	Angus-Hereford	NA	not_collected	92858408	91066330	0.980701	4518574750	4431972529
SRR2432444,SRR2432445,SRR2432446,SRR2432447,SRR2432448,SRR2432449,SRR2432450	SAMN04091523	Bos_taurus	PRJNA272725	Nasal_pharynx	Nasal_pharynx	Angus-Hereford	NA	not_collected	76877562	75283950	0.979271	3753315142	3676196607
SRR2432479,SRR2432480,SRR2432481,SRR2432482,SRR2432483,SRR2432484,SRR2432485	SAMN04091524	Bos_taurus	PRJNA272725	Nasal_pharynx	Nasal_pharynx	Angus-Hereford	NA	not_collected	76032664	73577844	0.967714	3709194414	3590056384
SRR2432514,SRR2432515,SRR2432516,SRR2432517,SRR2432518,SRR2432519,SRR2432520	SAMN04091525	Bos_taurus	PRJNA272725	Nasal_pharynx	Nasal_pharynx	Angus-Hereford	NA	not_collected	67715470	66378274	0.980253	3304668470	3240021364
SRR2432550,SRR2432551,SRR2432552,SRR2432553,SRR2432554,SRR2432555,SRR2432556	SAMN04091526	Bos_taurus	PRJNA272725	Nasal_pharynx	Nasal_pharynx	Angus-Hereford	NA	not_collected	67223062	65739212	0.977926	3279998766	3208192057
SRR2432586,SRR2432587,SRR2432588,SRR2432589,SRR2432590,SRR2432591,SRR2432592	SAMN04091527	Bos_taurus	PRJNA272725	Nasal_pharynx	Nasal_pharynx	Angus-Hereford	NA	not_collected	58633886	57286362	0.977018	2861907709	2796689158
SRR2432622,SRR2432623,SRR2432624,SRR2432625,SRR2432626,SRR2432627,SRR2432628	SAMN04091528	Bos_taurus	PRJNA272725	Nasal_pharynx	Nasal_pharynx	Angus-Hereford	NA	not_collected	59503536	58121758	0.976778	2906142436	2839235665
SRR2432657,SRR2432658,SRR2432659,SRR2432660,SRR2432661,SRR2432662,SRR2432663	SAMN04091529	Bos_taurus	PRJNA272725	Nasal_pharynx	Nasal_pharynx	Angus-Hereford	NA	not_collected	90392074	88207846	0.975836	4414515513	4308659980
SRR2432692,SRR2432693,SRR2432694,SRR2432695,SRR2432696,SRR2432697,SRR2432698	SAMN04091530	Bos_taurus	PRJNA272725	Nasal_pharynx	Nasal_pharynx	Angus-Hereford	NA	not_collected	81029682	79158100	0.976903	3951907675	3861417031
SRR2432727,SRR2432728,SRR2432729,SRR2432730,SRR2432731,SRR2432732,SRR2432733	SAMN04091531	Bos_taurus	PRJNA272725	Nasal_pharynx	Nasal_pharynx	Angus-Hereford	NA	not_collected	64355794	61627232	0.957602	3141855509	3009275779
SRR2432762,SRR2432763,SRR2432764,SRR2432765,SRR2432766,SRR2432767,SRR2432768	SAMN04091532	Bos_taurus	PRJNA272725	Nasal_pharynx	Nasal_pharynx	Angus-Hereford	NA	not_collected	58909562	56764462	0.963587	2878042826	2773735463
SRR2432797,SRR2432798,SRR2432799,SRR2432800,SRR2432801,SRR2432802,SRR2432803	SAMN04091533	Bos_taurus	PRJNA272725	Nasal_pharynx	Nasal_pharynx	Angus-Hereford	NA	not_collected	72354792	69582478	0.961684	3535309645	3400463891
SRR2432832,SRR2432833,SRR2432834,SRR2432835,SRR2432836,SRR2432837,SRR2432838	SAMN04091534	Bos_taurus	PRJNA272725	Nasal_pharynx	Nasal_pharynx	Angus-Hereford	NA	not_collected	64183746	61944336	0.965109	3132448478	3023753644
SRR2432867,SRR2432868,SRR2432869,SRR2432870,SRR2432871,SRR2432872,SRR2432873	SAMN04091535	Bos_taurus	PRJNA272725	Nasal_pharynx	Nasal_pharynx	Angus-Hereford	NA	not_collected	60778812	58764668	0.966861	2967566180	2869738888
SRR2432902,SRR2432903,SRR2432904,SRR2432905,SRR2432906,SRR2432907,SRR2432908	SAMN04091536	Bos_taurus	PRJNA272725	Nasal_pharynx	Nasal_pharynx	Angus-Hereford	NA	not_collected	67622944	66665608	0.985843	3310937098	3264573472
SRR2432938,SRR2432939,SRR2432940,SRR2432941,SRR2432942,SRR2432943,SRR2432944	SAMN04091537	Bos_taurus	PRJNA272725	Nasal_pharynx	Nasal_pharynx	Angus-Hereford	NA	not_collected	74586194	73012056	0.978895	3643745914	3567492206
SRR2432970,SRR2432971,SRR2432972,SRR2432973,SRR2432974,SRR2432975,SRR2432976	SAMN04091538	Bos_taurus	PRJNA272725	Nasal_pharynx	Nasal_pharynx	Angus-Hereford	NA	not_collected	73270378	70932630	0.968094	3576463496	3463027930
SRR2433006,SRR2433007,SRR2433008,SRR2433009,SRR2433010,SRR2433011,SRR2433012	SAMN04091539	Bos_taurus	PRJNA272725	Nasal_pharynx	Nasal_pharynx	Angus-Hereford	NA	not_collected	69016600	67483110	0.977781	3370113494	3295828976
SRR2433043,SRR2433044,SRR2433045,SRR2433046,SRR2433047,SRR2433048,SRR2433049	SAMN04091540	Bos_taurus	PRJNA272725	Nasal_pharynx	Nasal_pharynx	Angus-Hereford	NA	not_collected	77759980	75887440	0.975919	3797109862	3706272093
SRR2433079,SRR2433080,SRR2433081,SRR2433082,SRR2433083,SRR2433084,SRR2433085	SAMN04091541	Bos_taurus	PRJNA272725	Nasal_pharynx	Nasal_pharynx	Angus-Hereford	NA	not_collected	70950114	68912406	0.97128	3466809367	3367839832
SRR2433115,SRR2433116,SRR2433117,SRR2433118,SRR2433119,SRR2433120,SRR2433121	SAMN04091542	Bos_taurus	PRJNA272725	Nasal_pharynx	Nasal_pharynx	Angus-Hereford	NA	not_collected	94672872	91953458	0.971276	4636027281	4503588148
SRR2433150,SRR2433151,SRR2433152,SRR2433153,SRR2433154,SRR2433155,SRR2433156	SAMN04091543	Bos_taurus	PRJNA272725	Nasal_pharynx	Nasal_pharynx	Angus-Hereford	NA	not_collected	87275630	85091114	0.97497	4274944431	4168581494
SRR2433185,SRR2433186,SRR2433187,SRR2433188,SRR2433189,SRR2433190,SRR2433191	SAMN04091544	Bos_taurus	PRJNA272725	Nasal_pharynx	Nasal_pharynx	Angus-Hereford	NA	not_collected	120124242	117578136	0.978804	5881406065	5757480743
SRR2433220,SRR2433221,SRR2433222,SRR2433223,SRR2433224,SRR2433225,SRR2433226	SAMN04091545	Bos_taurus	PRJNA272725	Nasal_pharynx	Nasal_pharynx	Angus-Hereford	NA	not_collected	102606930	99936246	0.973972	5020672230	4890696435
SRR2432451,SRR2432452,SRR2432453,SRR2432454,SRR2432455,SRR2432456,SRR2432457	SAMN04091546	Bos_taurus	PRJNA272725	Pharyngeal_tonsil	Pharyngeal_tonsil	Angus-Hereford	NA	not_collected	84191598	82908696	0.984762	4119198580	4056797241
SRR2432486,SRR2432487,SRR2432488,SRR2432489,SRR2432490,SRR2432491,SRR2432492	SAMN04091547	Bos_taurus	PRJNA272725	Pharyngeal_tonsil	Pharyngeal_tonsil	Angus-Hereford	NA	not_collected	80708040	79620420	0.986524	3958931086	3905883236
SRR2432521,SRR2432522,SRR2432523,SRR2432524,SRR2432525,SRR2432526,SRR2432527,SRR2432528	SAMN04091548	Bos_taurus	PRJNA272725	Pharyngeal_tonsil	Pharyngeal_tonsil	Angus-Hereford	NA	not_collected	88950478	88011966	0.989449	4402373624	4356348021
SRR2432557,SRR2432558,SRR2432559,SRR2432560,SRR2432561,SRR2432562,SRR2432563	SAMN04091549	Bos_taurus	PRJNA272725	Pharyngeal_tonsil	Pharyngeal_tonsil	Angus-Hereford	NA	not_collected	62006838	61067852	0.984857	3027007686	2981456209
SRR2432593,SRR2432594,SRR2432595,SRR2432596,SRR2432597,SRR2432598,SRR2432599,SRR2432600	SAMN04091550	Bos_taurus	PRJNA272725	Pharyngeal_tonsil	Pharyngeal_tonsil	Angus-Hereford	NA	not_collected	75731490	74244360	0.980363	3741878560	3668812152
SRR2432629,SRR2432630,SRR2432631,SRR2432632,SRR2432633,SRR2432634,SRR2432635	SAMN04091551	Bos_taurus	PRJNA272725	Pharyngeal_tonsil	Pharyngeal_tonsil	Angus-Hereford	NA	not_collected	65901886	64763016	0.982719	3227406487	3171940162
SRR2432664,SRR2432665,SRR2432666,SRR2432667,SRR2432668,SRR2432669,SRR2432670	SAMN04091552	Bos_taurus	PRJNA272725	Pharyngeal_tonsil	Pharyngeal_tonsil	Angus-Hereford	NA	not_collected	140346282	137368568	0.978783	6880993725	6735608641
SRR2432699,SRR2432700,SRR2432701,SRR2432702,SRR2432703,SRR2432704,SRR2432705	SAMN04091553	Bos_taurus	PRJNA272725	Pharyngeal_tonsil	Pharyngeal_tonsil	Angus-Hereford	NA	not_collected	81865586	80570188	0.984177	4018259431	3955031300
SRR2432734,SRR2432735,SRR2432736,SRR2432737,SRR2432738,SRR2432739,SRR2432740	SAMN04091554	Bos_taurus	PRJNA272725	Pharyngeal_tonsil	Pharyngeal_tonsil	Angus-Hereford	NA	not_collected	94201118	92519128	0.982145	4618955631	4536892499
SRR2432769,SRR2432770,SRR2432771,SRR2432772,SRR2432773,SRR2432774,SRR2432775	SAMN04091555	Bos_taurus	PRJNA272725	Pharyngeal_tonsil	Pharyngeal_tonsil	Angus-Hereford	NA	not_collected	113167080	110485024	0.9763	5552881248	5421742743
SRR2432804,SRR2432805,SRR2432806,SRR2432807,SRR2432808,SRR2432809,SRR2432810	SAMN04091556	Bos_taurus	PRJNA272725	Pharyngeal_tonsil	Pharyngeal_tonsil	Angus-Hereford	NA	not_collected	84511328	82899788	0.980931	4138810651	4060313546
SRR2432839,SRR2432840,SRR2432841,SRR2432842,SRR2432843,SRR2432844,SRR2432845	SAMN04091557	Bos_taurus	PRJNA272725	Pharyngeal_tonsil	Pharyngeal_tonsil	Angus-Hereford	NA	not_collected	107659460	105650816	0.981343	5278785206	5180745535
SRR2432874,SRR2432875,SRR2432876,SRR2432877,SRR2432878,SRR2432879,SRR2432880	SAMN04091558	Bos_taurus	PRJNA272725	Pharyngeal_tonsil	Pharyngeal_tonsil	Angus-Hereford	NA	not_collected	73178692	71963194	0.98339	3578131525	3519013605
SRR2432909,SRR2432910,SRR2432911,SRR2432912,SRR2432913,SRR2432914,SRR2432915,SRR2432916	SAMN04091559	Bos_taurus	PRJNA272725	Pharyngeal_tonsil	Pharyngeal_tonsil	Angus-Hereford	NA	not_collected	65830202	64696944	0.982785	3216860873	3161851278
SRR2432945,SRR2432946,SRR2432947,SRR2432948,SRR2432949,SRR2432950,SRR2432951,SRR2432952	SAMN04091560	Bos_taurus	PRJNA272725	Pharyngeal_tonsil	Pharyngeal_tonsil	Angus-Hereford	NA	not_collected	140119656	137255822	0.979562	6971323184	6829596163
SRR2432977,SRR2432978,SRR2432979,SRR2432980,SRR2432981,SRR2432982,SRR2432983,SRR2432984	SAMN04091561	Bos_taurus	PRJNA272725	Pharyngeal_tonsil	Pharyngeal_tonsil	Angus-Hereford	NA	not_collected	83212100	81511364	0.979561	4117311657	4033601725
SRR2433013,SRR2433014,SRR2433015,SRR2433016,SRR2433017,SRR2433018,SRR2433019,SRR2433020	SAMN04091562	Bos_taurus	PRJNA272725	Pharyngeal_tonsil	Pharyngeal_tonsil	Angus-Hereford	NA	not_collected	63648928	62488670	0.981771	3136106132	3079306778
SRR2433050,SRR2433051,SRR2433052,SRR2433053,SRR2433054,SRR2433055,SRR2433056,SRR2433057	SAMN04091563	Bos_taurus	PRJNA272725	Pharyngeal_tonsil	Pharyngeal_tonsil	Angus-Hereford	NA	not_collected	72954762	71747758	0.983455	3602260346	3543039812
SRR2433086,SRR2433087,SRR2433088,SRR2433089,SRR2433090,SRR2433091,SRR2433092,SRR2433093	SAMN04091564	Bos_taurus	PRJNA272725	Pharyngeal_tonsil	Pharyngeal_tonsil	Angus-Hereford	NA	not_collected	89839636	88253104	0.98234	4421477514	4343906595
SRR2433122,SRR2433123,SRR2433124,SRR2433125,SRR2433126,SRR2433127,SRR2433128	SAMN04091565	Bos_taurus	PRJNA272725	Pharyngeal_tonsil	Pharyngeal_tonsil	Angus-Hereford	NA	not_collected	75534514	73853574	0.977746	3683709830	3602092735
SRR2433157,SRR2433158,SRR2433159,SRR2433160,SRR2433161,SRR2433162,SRR2433163	SAMN04091566	Bos_taurus	PRJNA272725	Pharyngeal_tonsil	Pharyngeal_tonsil	Angus-Hereford	NA	not_collected	61797660	60446686	0.978139	3011022088	2945509465
SRR2433192,SRR2433193,SRR2433194,SRR2433195,SRR2433196,SRR2433197,SRR2433198	SAMN04091567	Bos_taurus	PRJNA272725	Pharyngeal_tonsil	Pharyngeal_tonsil	Angus-Hereford	NA	not_collected	103554448	101787044	0.982933	5065744296	4979712678
SRR2433227,SRR2433228,SRR2433229,SRR2433230,SRR2433231,SRR2433232,SRR2433233	SAMN04091568	Bos_taurus	PRJNA272725	Pharyngeal_tonsil	Pharyngeal_tonsil	Angus-Hereford	NA	not_collected	148158284	145548622	0.982386	7267406740	7139966550
SRR2432437,SRR2432438,SRR2432439,SRR2432440,SRR2432441,SRR2432442,SRR2432443	SAMN04091569	Bos_taurus	PRJNA272725	Retropharyngeal_nodes	Lymph	Angus-Hereford	NA	not_collected	79529626	78108806	0.982135	3883020118	3814096477
SRR2432472,SRR2432473,SRR2432474,SRR2432475,SRR2432476,SRR2432477,SRR2432478	SAMN04091570	Bos_taurus	PRJNA272725	Retropharyngeal_nodes	Lymph	Angus-Hereford	NA	not_collected	76033946	74669526	0.982055	3713409537	3647202546
SRR2432507,SRR2432508,SRR2432509,SRR2432510,SRR2432511,SRR2432512,SRR2432513	SAMN04091571	Bos_taurus	PRJNA272725	Retropharyngeal_nodes	Lymph	Angus-Hereford	NA	not_collected	92593652	90417254	0.976495	4517449036	4411770209
SRR2432543,SRR2432544,SRR2432545,SRR2432546,SRR2432547,SRR2432548,SRR2432549	SAMN04091572	Bos_taurus	PRJNA272725	Retropharyngeal_nodes	Lymph	Angus-Hereford	NA	not_collected	62626106	61187752	0.977033	3055369951	2985563310
SRR2432579,SRR2432580,SRR2432581,SRR2432582,SRR2432583,SRR2432584,SRR2432585	SAMN04091573	Bos_taurus	PRJNA272725	Retropharyngeal_nodes	Lymph	Angus-Hereford	NA	not_collected	63164438	61768594	0.977901	3083011383	3015292116
SRR2432615,SRR2432616,SRR2432617,SRR2432618,SRR2432619,SRR2432620,SRR2432621	SAMN04091574	Bos_taurus	PRJNA272725	Retropharyngeal_nodes	Lymph	Angus-Hereford	NA	not_collected	71049914	69689742	0.980856	3468313621	3402383455
SRR2432650,SRR2432651,SRR2432652,SRR2432653,SRR2432654,SRR2432655,SRR2432656	SAMN04091575	Bos_taurus	PRJNA272725	Retropharyngeal_nodes	Lymph	Angus-Hereford	NA	not_collected	61573310	60468484	0.982057	3006025604	2952473228
SRR2432685,SRR2432686,SRR2432687,SRR2432688,SRR2432689,SRR2432690,SRR2432691	SAMN04091576	Bos_taurus	PRJNA272725	Retropharyngeal_nodes	Lymph	Angus-Hereford	NA	not_collected	71533302	70162970	0.980843	3491141377	3424712504
SRR2432720,SRR2432721,SRR2432722,SRR2432723,SRR2432724,SRR2432725,SRR2432726	SAMN04091577	Bos_taurus	PRJNA272725	Retropharyngeal_nodes	Lymph	Angus-Hereford	NA	not_collected	69695328	65660754	0.942111	3400422887	3204112764
SRR2432755,SRR2432756,SRR2432757,SRR2432758,SRR2432759,SRR2432760,SRR2432761	SAMN04091578	Bos_taurus	PRJNA272725	Retropharyngeal_nodes	Lymph	Angus-Hereford	NA	not_collected	70595906	68580738	0.971455	3446001712	3348071544
SRR2432790,SRR2432791,SRR2432792,SRR2432793,SRR2432794,SRR2432795,SRR2432796	SAMN04091579	Bos_taurus	PRJNA272725	Retropharyngeal_nodes	Lymph	Angus-Hereford	NA	not_collected	87180574	85134256	0.976528	4255596958	4156222023
SRR2432825,SRR2432826,SRR2432827,SRR2432828,SRR2432829,SRR2432830,SRR2432831	SAMN04091580	Bos_taurus	PRJNA272725	Retropharyngeal_nodes	Lymph	Angus-Hereford	NA	not_collected	80987046	77877488	0.961604	3952341599	3801114453
SRR2432860,SRR2432861,SRR2432862,SRR2432863,SRR2432864,SRR2432865,SRR2432866	SAMN04091581	Bos_taurus	PRJNA272725	Retropharyngeal_nodes	Lymph	Angus-Hereford	NA	not_collected	60389898	58569402	0.969854	2947342389	2858832083
SRR2432895,SRR2432896,SRR2432897,SRR2432898,SRR2432899,SRR2432900,SRR2432901	SAMN04091582	Bos_taurus	PRJNA272725	Retropharyngeal_nodes	Lymph	Angus-Hereford	NA	not_collected	79908084	78702940	0.984918	3905004468	3846554984
SRR2432931,SRR2432932,SRR2432933,SRR2432934,SRR2432935,SRR2432936,SRR2432937	SAMN04091583	Bos_taurus	PRJNA272725	Retropharyngeal_nodes	Lymph	Angus-Hereford	NA	not_collected	73507516	72243790	0.982808	3589347975	3528065046
SRR2432963,SRR2432964,SRR2432965,SRR2432966,SRR2432967,SRR2432968,SRR2432969	SAMN04091584	Bos_taurus	PRJNA272725	Retropharyngeal_nodes	Lymph	Angus-Hereford	NA	not_collected	80603896	78972168	0.979756	3937734081	3858473260
SRR2432999,SRR2433000,SRR2433001,SRR2433002,SRR2433003,SRR2433004,SRR2433005	SAMN04091585	Bos_taurus	PRJNA272725	Retropharyngeal_nodes	Lymph	Angus-Hereford	NA	not_collected	60846390	58856122	0.96729	2971837178	2874953573
SRR2433036,SRR2433037,SRR2433038,SRR2433039,SRR2433040,SRR2433041,SRR2433042	SAMN04091586	Bos_taurus	PRJNA272725	Retropharyngeal_nodes	Lymph	Angus-Hereford	NA	not_collected	78886992	77590492	0.983565	3850817297	3787991750
SRR2433072,SRR2433073,SRR2433074,SRR2433075,SRR2433076,SRR2433077,SRR2433078	SAMN04091587	Bos_taurus	PRJNA272725	Retropharyngeal_nodes	Lymph	Angus-Hereford	NA	not_collected	72223230	70283832	0.973147	3528278798	3433941672
SRR2433108,SRR2433109,SRR2433110,SRR2433111,SRR2433112,SRR2433113,SRR2433114	SAMN04091588	Bos_taurus	PRJNA272725	Retropharyngeal_nodes	Lymph	Angus-Hereford	NA	not_collected	75273406	73366094	0.974662	3675966712	3583253649
SRR2433143,SRR2433144,SRR2433145,SRR2433146,SRR2433147,SRR2433148,SRR2433149	SAMN04091589	Bos_taurus	PRJNA272725	Retropharyngeal_nodes	Lymph	Angus-Hereford	NA	not_collected	71713160	70118814	0.977768	3501058276	3423639471
SRR2433178,SRR2433179,SRR2433180,SRR2433181,SRR2433182,SRR2433183,SRR2433184	SAMN04091590	Bos_taurus	PRJNA272725	Retropharyngeal_nodes	Lymph	Angus-Hereford	NA	not_collected	86911482	85501230	0.983774	4241192116	4172865521
SRR2433213,SRR2433214,SRR2433215,SRR2433216,SRR2433217,SRR2433218,SRR2433219	SAMN04091591	Bos_taurus	PRJNA272725	Retropharyngeal_nodes	Lymph	Angus-Hereford	NA	not_collected	106178594	104210642	0.981466	5183010844	5087572049
SRR6365438,SRR6365439,SRR6365440,SRR6365441	SAMN08159668	Bos_taurus	PRJNA421885	Endometrium	Uterine	Holstein	NA	NA	39583808	39194182	0.990157	2963894390	2937397013
SRR6365434,SRR6365435,SRR6365436,SRR6365437	SAMN08159669	Bos_taurus	PRJNA421885	Endometrium	Uterine	Holstein	NA	NA	39047676	38655716	0.989962	2922463411	2895962724
SRR6365430,SRR6365431,SRR6365432,SRR6365433	SAMN08159670	Bos_taurus	PRJNA421885	Endometrium	Uterine	Holstein	NA	NA	45131754	44727994	0.991054	3377562371	3350301319
SRR6365426,SRR6365427,SRR6365428,SRR6365429	SAMN08159671	Bos_taurus	PRJNA421885	Endometrium	Uterine	Holstein	NA	NA	35919278	35630426	0.991958	2685061836	2665200645
SRR6365422,SRR6365423,SRR6365424,SRR6365425	SAMN08159672	Bos_taurus	PRJNA421885	Endometrium	Uterine	Holstein	NA	NA	39253871	38810395	0.988702	2939812739	2909100933
SRR6365418,SRR6365419,SRR6365420,SRR6365421	SAMN08159673	Bos_taurus	PRJNA421885	Endometrium	Uterine	Holstein	NA	NA	45989666	45574182	0.990966	3443348776	3414637939
SRR6365414,SRR6365415,SRR6365416,SRR6365417	SAMN08159674	Bos_taurus	PRJNA421885	Endometrium	Uterine	Holstein	NA	NA	39897520	39557500	0.991478	2987868530	2964256760
SRR6365410,SRR6365411,SRR6365412,SRR6365413	SAMN08159675	Bos_taurus	PRJNA421885	Endometrium	Uterine	Holstein	NA	NA	34677715	34410933	0.992307	2596333075	2578087530
SRR6365406,SRR6365407,SRR6365408,SRR6365409	SAMN08159676	Bos_taurus	PRJNA421885	Endometrium	Uterine	Holstein	NA	NA	30150014	29851966	0.990114	2259520116	2238708057
SRR6365402,SRR6365403,SRR6365404,SRR6365405	SAMN08159677	Bos_taurus	PRJNA421885	Endometrium	Uterine	Holstein	NA	NA	41092628	40701240	0.990475	3076623925	3049726533
SRR6365398,SRR6365399,SRR6365400,SRR6365401	SAMN08159678	Bos_taurus	PRJNA421885	Endometrium	Uterine	Holstein	NA	NA	31468207	31193885	0.991283	2356469779	2337629839
SRR6365394,SRR6365395,SRR6365396,SRR6365397	SAMN08159679	Bos_taurus	PRJNA421885	Endometrium	Uterine	Holstein	NA	NA	35796821	35401631	0.98896	2680952503	2653680254
SRR6365390,SRR6365391,SRR6365392,SRR6365393	SAMN08159680	Bos_taurus	PRJNA421885	Endometrium	Uterine	Holstein	NA	NA	40820452	40473952	0.991512	3058947291	3034982797
SRR6365386,SRR6365387,SRR6365388,SRR6365389	SAMN08159681	Bos_taurus	PRJNA421885	Endometrium	Uterine	Holstein	NA	NA	35673101	35335681	0.990541	2672442258	2649351451
SRR6365382,SRR6365383,SRR6365384,SRR6365385	SAMN08159682	Bos_taurus	PRJNA421885	Endometrium	Uterine	Holstein	NA	NA	37859298	37419252	0.988377	2835105294	2804362213
SRR6365378,SRR6365379,SRR6365380,SRR6365381	SAMN08159683	Bos_taurus	PRJNA421885	Endometrium	Uterine	Holstein	NA	NA	37201856	36902064	0.991941	2786975948	2766490677
SRR6365374,SRR6365375,SRR6365376,SRR6365377	SAMN08159684	Bos_taurus	PRJNA421885	Endometrium	Uterine	Holstein	NA	NA	38306906	37994022	0.991832	2870292701	2848973612
SRR6365370,SRR6365371,SRR6365372,SRR6365373	SAMN08159685	Bos_taurus	PRJNA421885	Endometrium	Uterine	Holstein	NA	NA	40121325	39674435	0.988862	3003743590	2973577038
SRR6365366,SRR6365367,SRR6365368,SRR6365369	SAMN08159686	Bos_taurus	PRJNA421885	Endometrium	Uterine	Holstein	NA	NA	40467195	40068673	0.990152	3032513589	3005118390
SRR6365362,SRR6365363,SRR6365364,SRR6365365	SAMN08159687	Bos_taurus	PRJNA421885	Conceptus	Fetus	Holstein	NA	NA	46398254	45342492	0.977246	3466361165	3390205997
SRR6365358,SRR6365359,SRR6365360,SRR6365361	SAMN08159688	Bos_taurus	PRJNA421885	Conceptus	Fetus	Holstein	NA	NA	53847101	47286097	0.878155	4008280971	3532165796
SRR6365330,SRR6365331,SRR6365332,SRR6365333	SAMN08159689	Bos_taurus	PRJNA421885	Conceptus	Fetus	Holstein	NA	NA	32587268	31124854	0.955123	2422929191	2325580453
SRR6365306,SRR6365307,SRR6365308,SRR6365309	SAMN08159690	Bos_taurus	PRJNA421885	Conceptus	Fetus	Holstein	NA	NA	59251285	57682213	0.973518	4411972019	4299361489
SRR6365302,SRR6365303,SRR6365304,SRR6365305	SAMN08159691	Bos_taurus	PRJNA421885	Conceptus	Fetus	Holstein	NA	NA	71166646	69190368	0.97223	5321815463	5178322929
SRR6365298,SRR6365299,SRR6365300,SRR6365301	SAMN08159692	Bos_taurus	PRJNA421885	Conceptus	Fetus	Holstein	NA	NA	56040802	54653908	0.975252	4170173969	4070811886
SRR6365326,SRR6365327,SRR6365328,SRR6365329	SAMN08159693	Bos_taurus	PRJNA421885	Conceptus	Fetus	Holstein	NA	NA	65265689	63862311	0.978497	4877616363	4777071625
SRR6365322,SRR6365323,SRR6365324,SRR6365325	SAMN08159694	Bos_taurus	PRJNA421885	Conceptus	Fetus	Holstein	NA	NA	58766950	57423592	0.977141	4386019961	4289798460
SRR6365318,SRR6365319,SRR6365320,SRR6365321	SAMN08159695	Bos_taurus	PRJNA421885	Conceptus	Fetus	Holstein	NA	NA	34444882	32783760	0.951774	2558115366	2448446401
SRR6365314,SRR6365315,SRR6365316,SRR6365317	SAMN08159696	Bos_taurus	PRJNA421885	Conceptus	Fetus	Holstein	NA	NA	59019230	57861368	0.980382	4401575509	4319100699
SRR6365310,SRR6365311,SRR6365312,SRR6365313	SAMN08159697	Bos_taurus	PRJNA421885	Conceptus	Fetus	Holstein	NA	NA	59474063	58017785	0.975514	4437118388	4332184419
SRR6365294,SRR6365295,SRR6365296,SRR6365297	SAMN08159698	Bos_taurus	PRJNA421885	Conceptus	Fetus	Holstein	NA	NA	51502908	50393334	0.978456	3837055363	3757773602
SRR6365290,SRR6365291,SRR6365292,SRR6365293	SAMN08159699	Bos_taurus	PRJNA421885	Conceptus	Fetus	Holstein	NA	NA	63257847	61522819	0.972572	4711185106	4586652209
SRR6365286,SRR6365287,SRR6365288,SRR6365289	SAMN08159700	Bos_taurus	PRJNA421885	Conceptus	Fetus	Holstein	NA	NA	49160425	47161145	0.959332	3617907870	3474017309
SRR6365282,SRR6365283,SRR6365284,SRR6365285	SAMN08159701	Bos_taurus	PRJNA421885	Conceptus	Fetus	Holstein	NA	NA	83513563	81807563	0.979572	6235644517	6114090213
SRR6365278,SRR6365279,SRR6365280,SRR6365281	SAMN08159702	Bos_taurus	PRJNA421885	Conceptus	Fetus	Holstein	NA	NA	73572284	71599894	0.973191	5498549067	5356432355
SRR6365270,SRR6365271,SRR6365272,SRR6365273	SAMN08159703	Bos_taurus	PRJNA421885	Conceptus	Fetus	Holstein	NA	NA	65402014	63965808	0.97804	4871371141	4768397447
SRR6365266,SRR6365267,SRR6365268,SRR6365269	SAMN08159704	Bos_taurus	PRJNA421885	Conceptus	Fetus	Holstein	NA	NA	61244656	60022892	0.980051	4567020882	4480357052
SRR6365274,SRR6365275,SRR6365276,SRR6365277	SAMN08159705	Bos_taurus	PRJNA421885	Conceptus	Fetus	Holstein	NA	NA	54532469	53174617	0.9751	4060210051	3963396433
SRR6365258,SRR6365259,SRR6365260,SRR6365261	SAMN08159706	Bos_taurus	PRJNA421885	Conceptus	Fetus	Holstein	NA	NA	73518809	71475045	0.972201	5495703097	5348327690
SRR6365262,SRR6365263,SRR6365264,SRR6365265	SAMN08159707	Bos_taurus	PRJNA421885	Conceptus	Fetus	Holstein	NA	NA	63630252	62216930	0.977789	4733084297	4631841375
SRR6365334,SRR6365335,SRR6365336,SRR6365337	SAMN08159708	Bos_taurus	PRJNA421885	Conceptus	Fetus	Holstein	NA	NA	48211318	45022076	0.933849	3585385972	3358617032
SRR6365338,SRR6365339,SRR6365340,SRR6365341	SAMN08159709	Bos_taurus	PRJNA421885	Conceptus	Fetus	Holstein	NA	NA	41576939	40505551	0.974231	3107832923	3030629976
SRR6365346,SRR6365347,SRR6365348,SRR6365349	SAMN08159710	Bos_taurus	PRJNA421885	Conceptus	Fetus	Holstein	NA	NA	61979444	60663138	0.978762	4638629827	4544217396
SRR6365342,SRR6365343,SRR6365344,SRR6365345	SAMN08159711	Bos_taurus	PRJNA421885	Conceptus	Fetus	Holstein	NA	NA	45684056	44281354	0.969296	3403270751	3305720829
SRR6365350,SRR6365351,SRR6365352,SRR6365353	SAMN08159712	Bos_taurus	PRJNA421885	Conceptus	Fetus	Holstein	NA	NA	57180669	55854853	0.976814	4252115663	4157089859
SRR6365354,SRR6365355,SRR6365356,SRR6365357	SAMN08159713	Bos_taurus	PRJNA421885	Conceptus	Fetus	Holstein	NA	NA	52708179	51607161	0.979111	3926138459	3847123800
SRR6365462,SRR6365463,SRR6365464,SRR6365465	SAMN08159714	Bos_taurus	PRJNA421885	Endometrium	Uterine	Holstein	NA	NA	40073206	39785620	0.992823	3002411517	2982828496
SRR6365458,SRR6365459,SRR6365460,SRR6365461	SAMN08159715	Bos_taurus	PRJNA421885	Endometrium	Uterine	Holstein	NA	NA	46660645	46211899	0.990383	3488239929	3457800985
SRR6365454,SRR6365455,SRR6365456,SRR6365457	SAMN08159716	Bos_taurus	PRJNA421885	Endometrium	Uterine	Holstein	NA	NA	38175403	37851351	0.991511	2857073122	2835093779
SRR6365450,SRR6365451,SRR6365452,SRR6365453	SAMN08159717	Bos_taurus	PRJNA421885	Endometrium	Uterine	Holstein	NA	NA	35634150	35257526	0.989431	2667112152	2642196485
SRR6365446,SRR6365447,SRR6365448,SRR6365449	SAMN08159718	Bos_taurus	PRJNA421885	Endometrium	Uterine	Holstein	NA	NA	41869462	41473212	0.990536	3132654072	3105773717
SRR6365442,SRR6365443,SRR6365444,SRR6365445	SAMN08159719	Bos_taurus	PRJNA421885	Endometrium	Uterine	Holstein	NA	NA	46080204	45660932	0.990901	3443606457	3415292689
SRR6381385,SRR6381389,SRR6381386,SRR6381387,SRR6381388,SRR6381390	SAMN08183013	Bos_taurus	PRJNA422614	Endometrium	Uterine	NA	NA	NA	53909745	53745402	0.996952	4064754256	4053364205
SRR6381379,SRR6381380,SRR6381381,SRR6381382,SRR6381384,SRR6381383	SAMN08183014	Bos_taurus	PRJNA422614	Endometrium	Uterine	NA	NA	NA	53071265	52899835	0.99677	4001588256	3989667182
SRR6381375,SRR6381376,SRR6381377,SRR6381378,SRR6381373,SRR6381374	SAMN08183015	Bos_taurus	PRJNA422614	Endometrium	Uterine	NA	NA	NA	58852583	58610882	0.995893	4438408301	4421335813
SRR6381368,SRR6381370,SRR6381372,SRR6381367,SRR6381369,SRR6381371	SAMN08183016	Bos_taurus	PRJNA422614	Endometrium	Uterine	NA	NA	NA	55447058	55287887	0.997129	4180438656	4169442926
SRR6381362,SRR6381364,SRR6381366,SRR6381361,SRR6381363,SRR6381365	SAMN08183017	Bos_taurus	PRJNA422614	Endometrium	Uterine	NA	NA	NA	50264427	50091340	0.996556	3789220002	3777236971
SRR6381355,SRR6381357,SRR6381360,SRR6381356,SRR6381358,SRR6381359	SAMN08183018	Bos_taurus	PRJNA422614	Endometrium	Uterine	NA	NA	NA	59554073	59359044	0.996725	4491238443	4477641231
SRR6381350,SRR6381351,SRR6381352,SRR6381354,SRR6381349,SRR6381353	SAMN08183019	Bos_taurus	PRJNA422614	Endometrium	Uterine	NA	NA	NA	51264644	51076055	0.996321	3865997118	3852862218
SRR6381344,SRR6381347,SRR6381348,SRR6381343,SRR6381345,SRR6381346	SAMN08183020	Bos_taurus	PRJNA422614	Endometrium	Uterine	NA	NA	NA	49626246	49427099	0.995987	3742691992	3728683321
SRR6381337,SRR6381338,SRR6381339,SRR6381341,SRR6381342,SRR6381340	SAMN08183021	Bos_taurus	PRJNA422614	Endometrium	Uterine	NA	NA	NA	49843344	49316663	0.989433	3759935621	3721099990
SRR6381332,SRR6381334,SRR6381335,SRR6381336,SRR6381331,SRR6381333	SAMN08183022	Bos_taurus	PRJNA422614	Endometrium	Uterine	NA	NA	NA	51096451	50932610	0.996793	3853870426	3842441091
SRR6381325,SRR6381328,SRR6381330,SRR6381326,SRR6381327,SRR6381329	SAMN08183023	Bos_taurus	PRJNA422614	Endometrium	Uterine	NA	NA	NA	48139963	47751986	0.991941	3631252350	3602856709
SRR6381321,SRR6381323,SRR6381319,SRR6381320,SRR6381322,SRR6381324	SAMN08183024	Bos_taurus	PRJNA422614	Endometrium	Uterine	NA	NA	NA	44653625	44528698	0.997202	3367973242	3359328533
SRR6381313,SRR6381315,SRR6381318,SRR6381314,SRR6381316,SRR6381317	SAMN08183025	Bos_taurus	PRJNA422614	Endometrium	Uterine	NA	NA	NA	48063632	47167285	0.981351	3624810734	3558111059
SRR6381307,SRR6381309,SRR6381310,SRR6381311,SRR6381308,SRR6381312	SAMN08183026	Bos_taurus	PRJNA422614	Endometrium	Uterine	NA	NA	NA	58772659	58448152	0.994479	4433951757	4410462000
SRR6381302,SRR6381304,SRR6381305,SRR6381301,SRR6381303,SRR6381306	SAMN08183027	Bos_taurus	PRJNA422614	Endometrium	Uterine	NA	NA	NA	50622248	50448434	0.996566	3817895786	3805797963
SRR6381295,SRR6381297,SRR6381298,SRR6381300,SRR6381296,SRR6381299	SAMN08183028	Bos_taurus	PRJNA422614	Endometrium	Uterine	NA	NA	NA	54511502	54348301	0.997006	4112075711	4100708560
SRR6381289,SRR6381290,SRR6381291,SRR6381293,SRR6381292,SRR6381294	SAMN08183029	Bos_taurus	PRJNA422614	Endometrium	Uterine	NA	NA	NA	47846024	47701821	0.996986	3608325785	3598403532
SRR6381283,SRR6381284,SRR6381285,SRR6381287,SRR6381286,SRR6381288	SAMN08183030	Bos_taurus	PRJNA422614	Endometrium	Uterine	NA	NA	NA	54278752	54096205	0.996637	4093566281	4080877169
SRR6381277,SRR6381280,SRR6381281,SRR6381278,SRR6381279,SRR6381282	SAMN08183031	Bos_taurus	PRJNA422614	Endometrium	Uterine	NA	NA	NA	50818808	50394071	0.991642	3833115097	3802088436
SRR6381272,SRR6381274,SRR6381271,SRR6381273,SRR6381275,SRR6381276	SAMN08183032	Bos_taurus	PRJNA422614	Endometrium	Uterine	NA	NA	NA	52841079	52512517	0.993782	3984302539	3960602602
SRR6381265,SRR6381267,SRR6381268,SRR6381270,SRR6381266,SRR6381269	SAMN08183033	Bos_taurus	PRJNA422614	Endometrium	Uterine	NA	NA	NA	44293934	44153596	0.996832	3339300092	3329679214
SRR6381260,SRR6381259,SRR6381261,SRR6381262,SRR6381263,SRR6381264	SAMN08183034	Bos_taurus	PRJNA422614	Endometrium	Uterine	NA	NA	NA	56754733	56583640	0.996985	4281324850	4269475144
SRR6381256,SRR6381257,SRR6381258,SRR6381253,SRR6381254,SRR6381255	SAMN08183035	Bos_taurus	PRJNA422614	Endometrium	Uterine	NA	NA	NA	48255298	48092452	0.996625	3639452039	3628200435
SRR6381249,SRR6381251,SRR6381247,SRR6381248,SRR6381250,SRR6381252	SAMN08183036	Bos_taurus	PRJNA422614	Endometrium	Uterine	NA	NA	NA	49507706	49306793	0.995942	3734246598	3720122042
SRR6381242,SRR6381244,SRR6381246,SRR6381241,SRR6381243,SRR6381245	SAMN08183037	Bos_taurus	PRJNA422614	Endometrium	Uterine	NA	NA	NA	53950319	53724001	0.995805	4067264902	4051231220
SRR6381237,SRR6381239,SRR6381240,SRR6381235,SRR6381236,SRR6381238	SAMN08183038	Bos_taurus	PRJNA422614	Endometrium	Uterine	NA	NA	NA	57931714	57745409	0.996784	4367466619	4354496190
SRR6381230,SRR6381231,SRR6381234,SRR6381229,SRR6381232,SRR6381233	SAMN08183039	Bos_taurus	PRJNA422614	Endometrium	Uterine	NA	NA	NA	57224158	56318439	0.984172	4314742974	4247580198
SRR6381224,SRR6381227,SRR6381228,SRR6381223,SRR6381225,SRR6381226	SAMN08183040	Bos_taurus	PRJNA422614	Endometrium	Uterine	NA	NA	NA	50406136	50223115	0.996369	3800033352	3787230278
SRR6381217,SRR6381218,SRR6381220,SRR6381221,SRR6381219,SRR6381222	SAMN08183041	Bos_taurus	PRJNA422614	Endometrium	Uterine	NA	NA	NA	51230600	50961093	0.994739	3861895505	3842641749
SRR6381211,SRR6381213,SRR6381214,SRR6381212,SRR6381215,SRR6381216	SAMN08183042	Bos_taurus	PRJNA422614	Endometrium	Uterine	NA	NA	NA	55207308	54896202	0.994365	4163266001	4140855256
SRR6381205,SRR6381207,SRR6381208,SRR6381210,SRR6381206,SRR6381209	SAMN08183043	Bos_taurus	PRJNA422614	Endometrium	Uterine	NA	NA	NA	45906410	45444112	0.98993	3461249047	3427239493
SRR6381200,SRR6381201,SRR6381202,SRR6381199,SRR6381203,SRR6381204	SAMN08183044	Bos_taurus	PRJNA422614	Endometrium	Uterine	NA	NA	NA	57040121	56863172	0.996898	4301052701	4288811951
SRR6381196,SRR6381197,SRR6381198,SRR6381193,SRR6381194,SRR6381195	SAMN08183045	Bos_taurus	PRJNA422614	Endometrium	Uterine	NA	NA	NA	48786111	48649760	0.997205	3679646423	3670204168
SRR6381188,SRR6381190,SRR6381191,SRR6381192,SRR6381187,SRR6381189	SAMN08183046	Bos_taurus	PRJNA422614	Endometrium	Uterine	NA	NA	NA	51997921	51823165	0.996639	3920489439	3908245067
SRR6381183,SRR6381185,SRR6381181,SRR6381182,SRR6381184,SRR6381186	SAMN08183047	Bos_taurus	PRJNA422614	Endometrium	Uterine	NA	NA	NA	54422957	54247025	0.996767	4104164742	4091886555
SRR6381175,SRR6381176,SRR6381177,SRR6381180,SRR6381178,SRR6381179	SAMN08183048	Bos_taurus	PRJNA422614	Endometrium	Uterine	NA	NA	NA	51087902	50862080	0.99558	3852329984	3836248572
SRR6381169,SRR6381171,SRR6381172,SRR6381170,SRR6381173,SRR6381174	SAMN08183049	Bos_taurus	PRJNA422614	Endometrium	Uterine	NA	NA	NA	46550426	46398792	0.996743	3508959487	3498499844
SRR6381164,SRR6381163,SRR6381165,SRR6381166,SRR6381167,SRR6381168	SAMN08183050	Bos_taurus	PRJNA422614	Endometrium	Uterine	NA	NA	NA	53801341	53534971	0.995049	4057520616	4038417743
SRR6381158,SRR6381160,SRR6381162,SRR6381157,SRR6381159,SRR6381161	SAMN08183051	Bos_taurus	PRJNA422614	Endometrium	Uterine	NA	NA	NA	50063628	49901173	0.996755	3775224255	3763951472
SRR6381151,SRR6381153,SRR6381155,SRR6381152,SRR6381154,SRR6381156	SAMN08183052	Bos_taurus	PRJNA422614	Endometrium	Uterine	NA	NA	NA	52384270	52213159	0.996734	3950699224	3938830459
SRR6381146,SRR6381149,SRR6381145,SRR6381147,SRR6381148,SRR6381150	SAMN08183053	Bos_taurus	PRJNA422614	Endometrium	Uterine	NA	NA	NA	44289672	44049313	0.994573	3337953655	3320718026
SRR6381141,SRR6381144,SRR6381139,SRR6381140,SRR6381142,SRR6381143	SAMN08183054	Bos_taurus	PRJNA422614	Endometrium	Uterine	NA	NA	NA	56344354	56085335	0.995403	4247047504	4228587935
SRR6381135,SRR6381137,SRR6381133,SRR6381134,SRR6381136,SRR6381138	SAMN08183055	Bos_taurus	PRJNA422614	Endometrium	Uterine	NA	NA	NA	47303573	47136806	0.996475	3567508572	3555803200
SRR6381127,SRR6381130,SRR6381132,SRR6381128,SRR6381129,SRR6381131	SAMN08183056	Bos_taurus	PRJNA422614	Endometrium	Uterine	NA	NA	NA	47754897	47604497	0.996851	3599794619	3589404631
SRR6381122,SRR6381124,SRR6381125,SRR6381121,SRR6381123,SRR6381126	SAMN08183057	Bos_taurus	PRJNA422614	Endometrium	Uterine	NA	NA	NA	58889700	58692204	0.996646	4439646871	4425871376
SRR6381115,SRR6381116,SRR6381118,SRR6381119,SRR6381120,SRR6381117	SAMN08183058	Bos_taurus	PRJNA422614	Endometrium	Uterine	NA	NA	NA	53191520	52905702	0.994627	4011526247	3990918101
SRR6381111,SRR6381114,SRR6381109,SRR6381110,SRR6381112,SRR6381113	SAMN08183059	Bos_taurus	PRJNA422614	Endometrium	Uterine	NA	NA	NA	51624012	51460278	0.996828	3892188658	3880903581
SRR6381104,SRR6381106,SRR6381107,SRR6381103,SRR6381105,SRR6381108	SAMN08183060	Bos_taurus	PRJNA422614	Endometrium	Uterine	NA	NA	NA	47278506	47136484	0.996996	3564363073	3554564027
SRR6381097,SRR6381101,SRR6381102,SRR6381098,SRR6381099,SRR6381100	SAMN08183061	Bos_taurus	PRJNA422614	Endometrium	Uterine	NA	NA	NA	41599414	41469764	0.996883	3136729109	3127786597
SRR6381093,SRR6381096,SRR6381091,SRR6381092,SRR6381094,SRR6381095	SAMN08183062	Bos_taurus	PRJNA422614	Endometrium	Uterine	NA	NA	NA	42426283	42301861	0.997067	3199675443	3191058970
SRR7792058,SRR7792059,SRR7792060,SRR7792061,SRR7792062	SAMN09982958	Bos_taurus	PRJNA489591	Longissimus_dorsi	Muscle	NA	NA	NA	46147644	41034308	0.889196	5649633231	5020360826
SRR7792053,SRR7792054,SRR7792055,SRR7792056,SRR7792057	SAMN09982959	Bos_taurus	PRJNA489591	Longissimus_dorsi	Muscle	NA	NA	NA	41827923	35302291	0.843989	5018526867	4331597130
SRR7792048,SRR7792049,SRR7792050,SRR7792051,SRR7792052	SAMN09982960	Bos_taurus	PRJNA489591	Longissimus_dorsi	Muscle	NA	NA	NA	51874022	49698614	0.958064	6227184373	5964877803
SRR7792030,SRR7792031,SRR7792032,SRR7792033	SAMN09982964	Bos_taurus	PRJNA489591	Longissimus_dorsi	Muscle	NA	NA	NA	26527043	26026287	0.981123	3255301649	3195098854
SRR7792024,SRR7792025,SRR7792026,SRR7792027,SRR7792028,SRR7792029	SAMN09982965	Bos_taurus	PRJNA489591	Longissimus_dorsi	Muscle	NA	NA	NA	53673252	51198316	0.953889	6585516350	6283358709
SRR7792020,SRR7792021,SRR7792022,SRR7792023	SAMN09982966	Bos_taurus	PRJNA489591	Longissimus_dorsi	Muscle	NA	NA	NA	25129940	24687010	0.982374	3087310214	3034958525
SRR7792006,SRR7792007,SRR7792008,SRR7792009,SRR7792010,SRR7792011	SAMN09982975	Bos_taurus	PRJNA489591	Longissimus_dorsi	Muscle	NA	NA	NA	67180086	65715370	0.978197	8125695748	7950449512
SRR7792000,SRR7792001,SRR7792002,SRR7792003,SRR7792004,SRR7792005	SAMN09982976	Bos_taurus	PRJNA489591	Longissimus_dorsi	Muscle	NA	NA	NA	71483744	70029586	0.979658	8659737615	8486655029
SRR7791995,SRR7791996,SRR7791997,SRR7791998,SRR7791999	SAMN09982977	Bos_taurus	PRJNA489591	Longissimus_dorsi	Muscle	NA	NA	NA	52635323	51883551	0.985717	6365345909	6278031304
SRR7791989,SRR7791990,SRR7791991,SRR7791992,SRR7791993,SRR7791994	SAMN09982978	Bos_taurus	PRJNA489591	Longissimus_dorsi	Muscle	NA	NA	NA	68382528	64415776	0.941992	8175287802	7699210980
SRR7791982,SRR7791983,SRR7791984,SRR7791985,SRR7791986,SRR7791987,SRR7791988	SAMN09982979	Bos_taurus	PRJNA489591	Longissimus_dorsi	Muscle	NA	NA	NA	72282258	71366550	0.987331	8780573962	8675376120
SRR7791977,SRR7791978,SRR7791979,SRR7791980,SRR7791981	SAMN09982980	Bos_taurus	PRJNA489591	Longissimus_dorsi	Muscle	NA	NA	NA	55631706	53975880	0.970236	6613604238	6421986860
SRR7791971,SRR7791972,SRR7791973,SRR7791974,SRR7791975,SRR7791976	SAMN09982981	Bos_taurus	PRJNA489591	Longissimus_dorsi	Muscle	NA	NA	NA	90308902	86905128	0.96231	11100746293	10685869003
SRR7791969,SRR7791970	SAMN09982982	Bos_taurus	PRJNA489591	Longissimus_dorsi	Muscle	NA	NA	NA	38660638	37749648	0.976436	4725630685	4616294798
SRR7791963,SRR7791964,SRR7791965,SRR7791966,SRR7791967,SRR7791968	SAMN09982983	Bos_taurus	PRJNA489591	Longissimus_dorsi	Muscle	NA	NA	NA	84971313	82482535	0.97071	10439020832	10138924848
SRR7791959,SRR7791960,SRR7791961,SRR7791962	SAMN09982984	Bos_taurus	PRJNA489591	Longissimus_dorsi	Muscle	NA	NA	NA	33796556	32976070	0.975723	4124064164	4026725119
SRR7791955,SRR7791956,SRR7791957,SRR7791958	SAMN09982985	Bos_taurus	PRJNA489591	Longissimus_dorsi	Muscle	NA	NA	NA	44685310	43364312	0.970438	5445545192	5288864154
SRR7791950,SRR7791951,SRR7791952,SRR7791953,SRR7791954	SAMN09982986	Bos_taurus	PRJNA489591	Longissimus_dorsi	Muscle	NA	NA	NA	48559574	45753784	0.94222	5956773594	5612037683
SRR7791944,SRR7791945,SRR7791946,SRR7791947,SRR7791948,SRR7791949	SAMN09982987	Bos_taurus	PRJNA489591	Longissimus_dorsi	Muscle	NA	NA	NA	54707714	52249370	0.955064	6731168570	6429376298
SRR7791939,SRR7791940,SRR7791941,SRR7791942,SRR7791943	SAMN09982988	Bos_taurus	PRJNA489591	Longissimus_dorsi	Muscle	NA	NA	NA	48336792	46755448	0.967285	5935987810	5744340389
SRR7791910,SRR7791911,SRR7791912,SRR7791913,SRR7791914,SRR7791915,SRR7791916,SRR7791917,SRR7791918,SRR7791919,SRR7791920,SRR7791921,SRR7791922,SRR7791923,SRR7791924,SRR7791925,SRR7791926,SRR7791927,SRR7791928,SRR7791929,SRR7791930,SRR7791931,SRR7791932,SRR7791933,SRR7791934,SRR7791935,SRR7791936,SRR7791937,SRR7791938	SAMN09982989	Bos_taurus	PRJNA489591	Longissimus_dorsi	Muscle	NA	NA	NA	417226576	394618998	0.945815	51255809558	48493117606
SRR7792133,SRR7792134,SRR7792135,SRR7792136,SRR7792137,SRR7792138,SRR7792139	SAMN09982990	Bos_taurus	PRJNA489591	Longissimus_dorsi	Muscle	NA	NA	NA	73039616	71171506	0.974423	8873778780	8654343858
SRR7792128,SRR7792129,SRR7792130,SRR7792131,SRR7792132	SAMN09982991	Bos_taurus	PRJNA489591	Longissimus_dorsi	Muscle	NA	NA	NA	60348246	59066692	0.978764	7301412822	7150007916
SRR7792123,SRR7792124,SRR7792125,SRR7792126,SRR7792127	SAMN09982992	Bos_taurus	PRJNA489591	Longissimus_dorsi	Muscle	NA	NA	NA	57424168	55133054	0.960102	6942855846	6677704883
SRR7792116,SRR7792117,SRR7792118,SRR7792119,SRR7792120,SRR7792121,SRR7792122	SAMN09982993	Bos_taurus	PRJNA489591	Longissimus_dorsi	Muscle	NA	NA	NA	75309862	73500676	0.975977	9168800668	8953647594
SRR7792111,SRR7792112,SRR7792113,SRR7792114,SRR7792115	SAMN09982994	Bos_taurus	PRJNA489591	Longissimus_dorsi	Muscle	NA	NA	NA	56980552	55993148	0.982671	6905480644	6790352663
SRR7792103,SRR7792104,SRR7792105,SRR7792106,SRR7792107,SRR7792108,SRR7792109,SRR7792110	SAMN09982995	Bos_taurus	PRJNA489591	Longissimus_dorsi	Muscle	NA	NA	NA	88440382	87173940	0.98568	10778012158	10626301210
SRR7792098,SRR7792099,SRR7792100,SRR7792101,SRR7792102	SAMN09982996	Bos_taurus	PRJNA489591	Longissimus_dorsi	Muscle	NA	NA	NA	48656912	47631418	0.978924	5937526832	5814777558
SRR7792092,SRR7792093,SRR7792094,SRR7792095,SRR7792096,SRR7792097	SAMN09982997	Bos_taurus	PRJNA489591	Longissimus_dorsi	Muscle	NA	NA	NA	73313260	70654918	0.96374	8933944720	8623344339
SRR7792088,SRR7792089,SRR7792090,SRR7792091	SAMN09982998	Bos_taurus	PRJNA489591	Longissimus_dorsi	Muscle	NA	NA	NA	33558350	32840668	0.978614	4091218838	4008556690
SRR7792080,SRR7792081,SRR7792082,SRR7792083,SRR7792084	SAMN09983002	Bos_taurus	PRJNA489591	Longissimus_dorsi	Muscle	NA	NA	NA	39922149	38266897	0.958538	4907332819	4704474189
SRR7792075,SRR7792076,SRR7792077,SRR7792078,SRR7792079	SAMN09983003	Bos_taurus	PRJNA489591	Longissimus_dorsi	Muscle	NA	NA	NA	50210576	47661090	0.949224	6165726988	5860363211
SRR7792070,SRR7792071,SRR7792072,SRR7792073,SRR7792074	SAMN09983004	Bos_taurus	PRJNA489591	Longissimus_dorsi	Muscle	NA	NA	NA	55581678	53648102	0.965212	6827277646	6592005507
SRR7792043,SRR7792044,SRR7792045,SRR7792046	SAMN09983010	Bos_taurus	PRJNA489591	Longissimus_dorsi	Muscle	NA	NA	NA	42464446	41675038	0.98141	5177908816	5083782333
SRR7792036,SRR7792037,SRR7792038,SRR7792039,SRR7792040,SRR7792041,SRR7792042	SAMN09983011	Bos_taurus	PRJNA489591	Longissimus_dorsi	Muscle	NA	NA	NA	79454404	76579280	0.963814	9707525012	9360548969
SRR8614348,SRR8614392	SAMN10940128	Bos_taurus	PRJNA522422	Liver	Liver	Angus	male	MISSING	62518333	62212030	0.995101	5628481765	5603587400
SRR8614772,SRR8614780	SAMN10940129	Bos_taurus	PRJNA522422	Small_Intestine	Small_Intestine	Angus	male	MISSING	10300195	10112865	0.981813	801754263	787334522
SRR8614237,SRR8614238,SRR8614239	SAMN10940131	Bos_taurus	PRJNA522422	Liver	Liver	Angus	male	MISSING	75693712	75304128	0.994853	6843315955	6811152469
SRR8614233,SRR8614232	SAMN10940136	Bos_taurus	PRJNA522422	Liver	Liver	Angus	male	MISSING	93913922	93469993	0.995273	8551323994	8515079092
SRR8614440,SRR8614441,SRR8614442	SAMN10940138	Bos_taurus	PRJNA522422	Liver	Liver	Angus	male	MISSING	73414972	72987671	0.99418	6680242062	6644852335
SRR8614436,SRR8614437	SAMN10940141	Bos_taurus	PRJNA522422	Liver	Liver	Angus	male	MISSING	71318214	70766219	0.99226	6524219703	6480075057
SRR8614796,SRR8614801	SAMN10940161	Bos_taurus	PRJNA522422	Liver	Liver	Angus	male	MISSING	73584289	73238813	0.995305	6629549489	6601613408
SRR8614307,SRR8614310	SAMN10940168	Bos_taurus	PRJNA522422	Liver	Liver	Angus	male	MISSING	79438483	79096951	0.995701	7181603990	7153829791
SRR8614208,SRR8614213,SRR8614207	SAMN10940174	Bos_taurus	PRJNA522422	Liver	Liver	Angus	male	MISSING	84013462	83672999	0.995948	7434129779	7406357976
SRR8614359,SRR8614360	SAMN10940182	Bos_taurus	PRJNA522422	Shoulder_Muscle_(Neck_muscle)	Muscle	Angus	male	MISSING	82659064	81996740	0.991987	4081835974	4049478319
SRR8614281,SRR8614362	SAMN10940183	Bos_taurus	PRJNA522422	Liver	Liver	Angus	male	MISSING	67662236	66705628	0.985862	3342874965	3295948385
SRR8614363,SRR8614364	SAMN10940184	Bos_taurus	PRJNA522422	Antirior_Pituitary	Pituitary	Angus	male	MISSING	69676038	68864664	0.988355	3438356100	3398732644
SRR8614355,SRR8614526,SRR8614557	SAMN10940185	Bos_taurus	PRJNA522422	Median_Emminence_Hypothalamus	Hypothalamus	Angus	male	MISSING	59260645	58630821	0.989372	3285451029	3252388837
SRR8614559,SRR8614246,SRR8614560	SAMN10940186	Bos_taurus	PRJNA522422	Small_Intestine	Small_Intestine	Angus	male	MISSING	46574435	45397221	0.974724	2583025347	2520510019
SRR8614561,SRR8614564	SAMN10940187	Bos_taurus	PRJNA522422	Shoulder_Muscle_(Neck_muscle)	Muscle	Angus	male	MISSING	85353956	84680290	0.992107	4214326923	4181419062
SRR8614563,SRR8614566	SAMN10940188	Bos_taurus	PRJNA522422	Liver	Liver	Angus	male	MISSING	75988392	75031676	0.98741	3754033690	3707154386
SRR8614567,SRR8614692,SRR8614599	SAMN10940189	Bos_taurus	PRJNA522422	Small_Intestine	Small_Intestine	Angus	male	MISSING	66458539	65609465	0.987224	3676109956	3631605472
SRR8614690,SRR8614488	SAMN10940190	Bos_taurus	PRJNA522422	Antirior_Pituitary	Pituitary	Angus	male	MISSING	73552422	72468106	0.985258	3629552592	3576544147
SRR8614688,SRR8614695,SRR8614689	SAMN10940191	Bos_taurus	PRJNA522422	Median_Emminence_Hypothalamus	Hypothalamus	Angus	male	MISSING	62163177	61495821	0.989264	3456748011	3421798061
SRR8614687,SRR8614745	SAMN10940192	Bos_taurus	PRJNA522422	Shoulder_Muscle_(Neck_muscle)	Muscle	Angus	male	MISSING	83563202	82576496	0.988192	4126294652	4077991696
SRR8614694,SRR8614693	SAMN10940193	Bos_taurus	PRJNA522422	Liver	Liver	Angus	male	MISSING	81660500	80581168	0.986783	4034619185	3981603112
SRR8614475,SRR8614472,SRR8614481	SAMN10940194	Bos_taurus	PRJNA522422	Small_Intestine	Small_Intestine	Angus	male	MISSING	66291239	64926199	0.979408	3671181134	3598742242
SRR8614470,SRR8614473	SAMN10940195	Bos_taurus	PRJNA522422	Antirior_Pituitary	Pituitary	Angus	male	MISSING	83104376	82040630	0.9872	4100171393	4048243933
SRR8614467,SRR8614469,SRR8614471	SAMN10940196	Bos_taurus	PRJNA522422	Median_Emminence_Hypothalamus	Hypothalamus	Angus	male	MISSING	55007531	54358699	0.988205	3013294488	2979620811
SRR8614474,SRR8614476	SAMN10940197	Bos_taurus	PRJNA522422	Shoulder_Muscle_(Neck_muscle)	Muscle	Angus	male	MISSING	82591530	81955268	0.992296	4078909088	4047796548
SRR8614339,SRR8614340	SAMN10940198	Bos_taurus	PRJNA522422	Liver	Liver	Angus	male	MISSING	85761680	84863360	0.989525	4237694729	4193619615
SRR8614342,SRR8614341	SAMN10940199	Bos_taurus	PRJNA522422	Antirior_Pituitary	Pituitary	Angus	male	MISSING	65752316	64931592	0.987518	3244398643	3204349988
SRR8614336,SRR8614335,SRR8614338	SAMN10940200	Bos_taurus	PRJNA522422	Median_Emminence_Hypothalamus	Hypothalamus	Angus	male	MISSING	61005191	60441487	0.99076	3390627635	3361093488
SRR8614337,SRR8614343,SRR8614344	SAMN10940201	Bos_taurus	PRJNA522422	Small_Intestine	Small_Intestine	Angus	male	MISSING	61408602	60029588	0.977544	3392878376	3319613526
SRR8614752,SRR8614753	SAMN10940202	Bos_taurus	PRJNA522422	Shoulder_Muscle_(Neck_muscle)	Muscle	Angus	male	MISSING	93303276	92616186	0.992636	4608001788	4574434174
SRR8614755,SRR8614754	SAMN10940203	Bos_taurus	PRJNA522422	Liver	Liver	Angus	male	MISSING	65695180	65011164	0.989588	3246114737	3212611780
SRR8614749,SRR8614748,SRR8614750	SAMN10940204	Bos_taurus	PRJNA522422	Small_Intestine	Small_Intestine	Angus	male	MISSING	51549737	50492171	0.979485	2821999693	2766310115
SRR8614743,SRR8614751	SAMN10940205	Bos_taurus	PRJNA522422	Antirior_Pituitary	Pituitary	Angus	male	MISSING	70027196	69154902	0.987543	3455387953	3412904449
SRR8614622,SRR8614625,SRR8614747	SAMN10940206	Bos_taurus	PRJNA522422	Median_Emminence_Hypothalamus	Hypothalamus	Angus	male	MISSING	63568201	62997817	0.991027	3548583183	3518678797
SRR8614621,SRR8614620	SAMN10940207	Bos_taurus	PRJNA522422	Shoulder_Muscle_(Neck_muscle)	Muscle	Angus	male	MISSING	89071714	88306564	0.99141	4398339393	4360931132
SRR8614624,SRR8614626,SRR8614627	SAMN10940208	Bos_taurus	PRJNA522422	Small_Intestine	Small_Intestine	Angus	male	MISSING	60079903	59449069	0.9895	3320500611	3287449708
SRR8614619,SRR8614623	SAMN10940209	Bos_taurus	PRJNA522422	Antirior_Pituitary	Pituitary	Angus	male	MISSING	87510252	86230314	0.985374	4319164415	4256746745
SRR8614248,SRR8614250,SRR8614618	SAMN10940210	Bos_taurus	PRJNA522422	Median_Emminence_Hypothalamus	Hypothalamus	Angus	male	MISSING	62285630	61707490	0.990718	3458462606	3428306253
SRR8614245,SRR8614247	SAMN10940211	Bos_taurus	PRJNA522422	Liver	Liver	Angus	male	MISSING	78752198	77366590	0.982405	3891115007	3822983135
SRR8614253,SRR8614252	SAMN10940212	Bos_taurus	PRJNA522422	Shoulder_Muscle_(Neck_muscle)	Muscle	Angus	male	MISSING	81263050	80491662	0.990508	4012234058	3974570277
SRR8614251,SRR8614249	SAMN10940213	Bos_taurus	PRJNA522422	Liver	Liver	Angus	male	MISSING	65504060	64741658	0.988361	3235959388	3198648725
SRR8614241,SRR8614242,SRR8614659	SAMN10940214	Bos_taurus	PRJNA522422	Small_Intestine	Small_Intestine	Angus	male	MISSING	55911432	54835180	0.980751	3096128385	3039269547
SRR8614655,SRR8614728	SAMN10940215	Bos_taurus	PRJNA522422	Antirior_Pituitary	Pituitary	Angus	male	MISSING	78765396	77706094	0.986551	3887116457	3835402597
SRR8614665,SRR8614729,SRR8614730	SAMN10940216	Bos_taurus	PRJNA522422	Median_Emminence_Hypothalamus	Hypothalamus	Angus	male	MISSING	59890365	59326517	0.990585	3310969661	3281617823
SRR8614367,SRR8614368	SAMN10940217	Bos_taurus	PRJNA522422	Shoulder_Muscle_(Neck_muscle)	Muscle	Angus	male	MISSING	84061238	83401320	0.99215	4150499929	4118278959
SRR8614529,SRR8614721,SRR8614722	SAMN10940218	Bos_taurus	PRJNA522422	Small_Intestine	Small_Intestine	Angus	male	MISSING	52914565	51305011	0.969582	2939168574	2852802386
SRR8614528,SRR8614531	SAMN10940219	Bos_taurus	PRJNA522422	Antirior_Pituitary	Pituitary	Angus	male	MISSING	71099100	70250578	0.988066	3508037451	3466622835
SRR8614532,SRR8614533,SRR8614534	SAMN10940220	Bos_taurus	PRJNA522422	Median_Emminence_Hypothalamus	Hypothalamus	Angus	male	MISSING	57127943	56503701	0.989073	3136630311	3104157287
SRR8614537,SRR8614536	SAMN10940221	Bos_taurus	PRJNA522422	Liver	Liver	Angus	male	MISSING	65339920	64243748	0.983224	3227889827	3174055401
SRR8614535,SRR8614538	SAMN10940222	Bos_taurus	PRJNA522422	Shoulder_Muscle_(Neck_muscle)	Muscle	Angus	male	MISSING	81609334	80971034	0.992179	4029453338	3998227511
SRR8614401,SRR8614403	SAMN10940223	Bos_taurus	PRJNA522422	Liver	Liver	Angus	male	MISSING	65260374	64283776	0.985035	3224062310	3176174794
SRR8614402,SRR8614399,SRR8614400	SAMN10940224	Bos_taurus	PRJNA522422	Small_Intestine	Small_Intestine	Angus	male	MISSING	59280303	57889203	0.976534	3288471375	3214434414
SRR8614398,SRR8614397	SAMN10940225	Bos_taurus	PRJNA522422	Antirior_Pituitary	Pituitary	Angus	male	MISSING	91909674	90796700	0.987891	4536333941	4481894540
SRR8614395,SRR8614396,SRR8614394	SAMN10940226	Bos_taurus	PRJNA522422	Median_Emminence_Hypothalamus	Hypothalamus	Angus	male	MISSING	70367825	69664497	0.990005	3892280001	3855525933
SRR8614322,SRR8614321	SAMN10940227	Bos_taurus	PRJNA522422	Shoulder_Muscle_(Neck_muscle)	Muscle	Angus	male	MISSING	77084148	76436560	0.991599	3806519225	3774897465
SRR8614319,SRR8614320	SAMN10940228	Bos_taurus	PRJNA522422	Liver	Liver	Angus	male	MISSING	66185696	65400160	0.988131	3270168430	3231663562
SRR8614315,SRR8614317,SRR8614318	SAMN10940229	Bos_taurus	PRJNA522422	Small_Intestine	Small_Intestine	Angus	male	MISSING	52489031	51622719	0.983495	2899939054	2854294804
SRR8614316,SRR8614313	SAMN10940230	Bos_taurus	PRJNA522422	Antirior_Pituitary	Pituitary	Angus	male	MISSING	63512904	62709058	0.987344	3133796199	3094633322
SRR8614314,SRR8614513,SRR8614512	SAMN10940231	Bos_taurus	PRJNA522422	Median_Emminence_Hypothalamus	Hypothalamus	Angus	male	MISSING	69897906	69223514	0.990352	3910877774	3875578720
SRR8614514,SRR8614515	SAMN10940232	Bos_taurus	PRJNA522422	Shoulder_Muscle_(Neck_muscle)	Muscle	Angus	male	MISSING	89370406	88647072	0.991906	4412702176	4377392203
SRR8614814,SRR8614812	SAMN10940233	Bos_taurus	PRJNA522422	Liver	Liver	Angus	male	MISSING	76562764	75375512	0.984493	3782383609	3724179220
SRR8614815,SRR8614666	SAMN10940234	Bos_taurus	PRJNA522422	Antirior_Pituitary	Pituitary	Angus	male	MISSING	71420810	70519160	0.987376	3524686274	3480716515
SRR8614506,SRR8614809,SRR8614813	SAMN10940235	Bos_taurus	PRJNA522422	Median_Emminence_Hypothalamus	Hypothalamus	Angus	male	MISSING	59979808	59352246	0.989537	3325992549	3293224742
SRR8614505,SRR8614508,SRR8614507	SAMN10940236	Bos_taurus	PRJNA522422	Small_Intestine	Small_Intestine	Angus	male	MISSING	59107598	57832088	0.978421	3275150393	3207515939
SRR8614500,SRR8614501	SAMN10940237	Bos_taurus	PRJNA522422	Shoulder_Muscle_(Neck_muscle)	Muscle	Angus	male	MISSING	81774076	81110234	0.991882	4037436660	4004943357
SRR8614502,SRR8614504	SAMN10940238	Bos_taurus	PRJNA522422	Liver	Liver	Angus	male	MISSING	103997028	102671430	0.987254	5138605326	5073405854
SRR8614650,SRR8614495,SRR8614497	SAMN10940239	Bos_taurus	PRJNA522422	Small_Intestine	Small_Intestine	Angus	male	MISSING	55754384	54878390	0.984288	3090074539	3043964268
SRR8614649,SRR8614651	SAMN10940240	Bos_taurus	PRJNA522422	Antirior_Pituitary	Pituitary	Angus	male	MISSING	72184838	71223908	0.986688	3562365777	3515484224
SRR8614647,SRR8614657,SRR8614648	SAMN10940241	Bos_taurus	PRJNA522422	Median_Emminence_Hypothalamus	Hypothalamus	Angus	male	MISSING	63184137	62457883	0.988506	3511203537	3473020796
SRR8614767,SRR8614352	SAMN10940313	Bos_taurus	PRJNA522422	Shoulder_Muscle_(Neck_muscle)	Muscle	Mixed/crossbred_NA	male	MISSING	69982566	69291332	0.990123	3455324174	3421679246
SRR8614459,SRR8614769	SAMN10940314	Bos_taurus	PRJNA522422	Liver	Liver	Mixed/crossbred_NA	male	MISSING	68141726	67256194	0.987005	3366954118	3323484078
SRR8614642,SRR8614458,SRR8614641	SAMN10940315	Bos_taurus	PRJNA522422	Small_Intestine	Small_Intestine	Mixed/crossbred_NA	male	MISSING	50818612	50176332	0.987361	2785817312	2752156533
SRR8614640,SRR8614639	SAMN10940316	Bos_taurus	PRJNA522422	Antirior_Pituitary	Pituitary	Mixed/crossbred_NA	male	MISSING	84423554	83514272	0.98923	4166108483	4121645044
SRR8614468,SRR8614637,SRR8614638	SAMN10940317	Bos_taurus	PRJNA522422	Median_Emminence_Hypothalamus	Hypothalamus	Mixed/crossbred_NA	male	MISSING	63753791	63154051	0.990593	3557324154	3525700877
SRR8614466,SRR8614493	SAMN10940318	Bos_taurus	PRJNA522422	Shoulder_Muscle_(Neck_muscle)	Muscle	Mixed/crossbred_NA	male	MISSING	76353068	75419362	0.987771	3770358799	3724681818
SRR8614494,SRR8614492,SRR8614496	SAMN10940319	Bos_taurus	PRJNA522422	Small_Intestine	Small_Intestine	Mixed/crossbred_NA	male	MISSING	56262374	54442948	0.967662	3171384323	3073251638
SRR8614498,SRR8614499	SAMN10940320	Bos_taurus	PRJNA522422	Antirior_Pituitary	Pituitary	Mixed/crossbred_NA	male	MISSING	66397300	65562540	0.987428	3276191468	3235548543
SRR8614600,SRR8614587,SRR8614591	SAMN10940321	Bos_taurus	PRJNA522422	Median_Emminence_Hypothalamus	Hypothalamus	Mixed/crossbred_NA	male	MISSING	100515856	98868158	0.983608	5517709499	5430523366
SRR8614817,SRR8614603	SAMN10940322	Bos_taurus	PRJNA522422	Liver	Liver	Mixed/crossbred_NA	male	MISSING	73335510	72466944	0.988156	3623847306	3581226676
SRR8614816,SRR8614819	SAMN10940323	Bos_taurus	PRJNA522422	Shoulder_Muscle_(Neck_muscle)	Muscle	Mixed/crossbred_NA	female	MISSING	74757528	74117314	0.991436	3691193110	3659989970
SRR8614818,SRR8614820,SRR8614822	SAMN10940324	Bos_taurus	PRJNA522422	Small_Intestine	Small_Intestine	Mixed/crossbred_NA	female	MISSING	51590668	50634300	0.981462	2865930785	2814969327
SRR8614821,SRR8614668	SAMN10940325	Bos_taurus	PRJNA522422	Antirior_Pituitary	Pituitary	Mixed/crossbred_NA	female	MISSING	75251790	74430878	0.989091	3714318662	3674282462
SRR8614667,SRR8614259,SRR8614672	SAMN10940326	Bos_taurus	PRJNA522422	Median_Emminence_Hypothalamus	Hypothalamus	Mixed/crossbred_NA	female	MISSING	121466003	120074049	0.98854	6465259983	6392717819
SRR8614262,SRR8614260	SAMN10940327	Bos_taurus	PRJNA522422	Liver	Liver	Mixed/crossbred_NA	female	MISSING	70566156	69531152	0.985333	3485502998	3434944652
SRR8614256,SRR8614264	SAMN10940328	Bos_taurus	PRJNA522422	Shoulder_Muscle_(Neck_muscle)	Muscle	Mixed/crossbred_NA	female	MISSING	68428920	67277952	0.98318	3378674020	3322387611
SRR8614261,SRR8614258	SAMN10940329	Bos_taurus	PRJNA522422	Liver	Liver	Mixed/crossbred_NA	female	MISSING	61257766	60174086	0.98231	3025919966	2972732049
SRR8614254,SRR8614257,SRR8614255	SAMN10940330	Bos_taurus	PRJNA522422	Small_Intestine	Small_Intestine	Mixed/crossbred_NA	female	MISSING	49241405	48141389	0.977661	2707201190	2648861196
SRR8614736,SRR8614737	SAMN10940331	Bos_taurus	PRJNA522422	Antirior_Pituitary	Pituitary	Mixed/crossbred_NA	female	MISSING	68754304	67914606	0.987787	3392530212	3351614859
SRR8614744,SRR8614735,SRR8614740	SAMN10940332	Bos_taurus	PRJNA522422	Median_Emminence_Hypothalamus	Hypothalamus	Mixed/crossbred_NA	female	MISSING	88699898	87667108	0.988356	4947123171	4892454456
SRR8614738,SRR8614739	SAMN10940333	Bos_taurus	PRJNA522422	Shoulder_Muscle_(Neck_muscle)	Muscle	Mixed/crossbred_NA	male	MISSING	77650632	76917790	0.990562	3833181420	3797404009
SRR8614733,SRR8614746	SAMN10940334	Bos_taurus	PRJNA522422	Liver	Liver	Mixed/crossbred_NA	male	MISSING	65545616	64482932	0.983787	3238098204	3185941250
SRR8614726,SRR8614734,SRR8614356	SAMN10940335	Bos_taurus	PRJNA522422	Small_Intestine	Small_Intestine	Mixed/crossbred_NA	male	MISSING	57590152	55203550	0.958559	3264147206	3132385238
SRR8614724,SRR8614725	SAMN10940336	Bos_taurus	PRJNA522422	Antirior_Pituitary	Pituitary	Mixed/crossbred_NA	male	MISSING	71288170	70488886	0.988788	3518412303	3479415030
SRR8614366,SRR8614731,SRR8614732	SAMN10940337	Bos_taurus	PRJNA522422	Median_Emminence_Hypothalamus	Hypothalamus	Mixed/crossbred_NA	male	MISSING	60496036	59806728	0.988606	3341385874	3305078475
SRR8614723,SRR8614361	SAMN10940338	Bos_taurus	PRJNA522422	Shoulder_Muscle_(Neck_muscle)	Muscle	Mixed/crossbred_NA	male	MISSING	84284410	83351594	0.988933	4160434224	4114943544
SRR8614230,SRR8614727	SAMN10940339	Bos_taurus	PRJNA522422	Liver	Liver	Mixed/crossbred_NA	male	MISSING	59147210	57789952	0.977053	2921650093	2855101835
SRR8614562,SRR8614231	SAMN10940340	Bos_taurus	PRJNA522422	Antirior_Pituitary	Pituitary	Mixed/crossbred_NA	male	MISSING	70529326	69668288	0.987792	3481025416	3439081908
SRR8614227,SRR8614226,SRR8614568	SAMN10940341	Bos_taurus	PRJNA522422	Median_Emminence_Hypothalamus	Hypothalamus	Mixed/crossbred_NA	male	MISSING	61548264	60951734	0.990308	3399374887	3368270753
SRR8614228,SRR8614229,SRR8614243	SAMN10940342	Bos_taurus	PRJNA522422	Small_Intestine	Small_Intestine	Mixed/crossbred_NA	male	MISSING	52633004	51452008	0.977562	2918510220	2855845665
SRR8614244,SRR8614452	SAMN10940343	Bos_taurus	PRJNA522422	Shoulder_Muscle_(Neck_muscle)	Muscle	Mixed/crossbred_NA	female	MISSING	93451276	92746400	0.992457	4614483142	4580024664
SRR8614456,SRR8614453	SAMN10940344	Bos_taurus	PRJNA522422	Liver	Liver	Mixed/crossbred_NA	female	MISSING	76319000	75158010	0.984788	3770576249	3713535623
SRR8614449,SRR8614454	SAMN10940345	Bos_taurus	PRJNA522422	Antirior_Pituitary	Pituitary	Mixed/crossbred_NA	female	MISSING	65612118	64777908	0.987286	3238014867	3197323501
SRR8614450,SRR8614451,SRR8614448	SAMN10940346	Bos_taurus	PRJNA522422	Median_Emminence_Hypothalamus	Hypothalamus	Mixed/crossbred_NA	female	MISSING	65422047	64788949	0.990323	3637200515	3603970488
SRR8614455,SRR8614457,SRR8614612	SAMN10940347	Bos_taurus	PRJNA522422	Small_Intestine	Small_Intestine	Mixed/crossbred_NA	female	MISSING	55969689	54609819	0.975703	3101889971	3029558735
SRR8614609,SRR8614616	SAMN10940348	Bos_taurus	PRJNA522422	Shoulder_Muscle_(Neck_muscle)	Muscle	Mixed/crossbred_NA	male	MISSING	77215540	76574866	0.991703	3812880237	3781603298
SRR8614606,SRR8614610	SAMN10940349	Bos_taurus	PRJNA522422	Liver	Liver	Mixed/crossbred_NA	male	MISSING	65280902	64006678	0.980481	3224955554	3162319884
SRR8614608,SRR8614605,SRR8614607	SAMN10940350	Bos_taurus	PRJNA522422	Small_Intestine	Small_Intestine	Mixed/crossbred_NA	male	MISSING	57792556	57097038	0.987965	3197795054	3161456186
SRR8614613,SRR8614611	SAMN10940351	Bos_taurus	PRJNA522422	Antirior_Pituitary	Pituitary	Mixed/crossbred_NA	male	MISSING	72615992	71748858	0.988059	3583921913	3541613591
SRR8614405,SRR8614789,SRR8614803	SAMN10940352	Bos_taurus	PRJNA522422	Median_Emminence_Hypothalamus	Hypothalamus	Mixed/crossbred_NA	male	MISSING	59951534	59300238	0.989136	3329168918	3294876686
SRR8614391,SRR8614773	SAMN10940353	Bos_taurus	PRJNA522422	Shoulder_Muscle_(Neck_muscle)	Muscle	Mixed/crossbred_NA	female	MISSING	85214880	84494660	0.991548	4207427565	4172245999
SRR8614379,SRR8614766	SAMN10940354	Bos_taurus	PRJNA522422	Liver	Liver	Mixed/crossbred_NA	female	MISSING	65659290	64877966	0.9881	3243555159	3205223345
SRR8614768,SRR8614810,SRR8614811	SAMN10940355	Bos_taurus	PRJNA522422	Small_Intestine	Small_Intestine	Mixed/crossbred_NA	female	MISSING	61992715	61086355	0.98538	3431285940	3383675601
SRR8614324,SRR8614323	SAMN10940356	Bos_taurus	PRJNA522422	Antirior_Pituitary	Pituitary	Mixed/crossbred_NA	female	MISSING	99720134	98474904	0.987513	4921564292	4860734899
SRR8614325,SRR8614327,SRR8614326	SAMN10940357	Bos_taurus	PRJNA522422	Median_Emminence_Hypothalamus	Hypothalamus	Mixed/crossbred_NA	female	MISSING	69368159	68732913	0.990842	3852422414	3819166866
SRR8614328,SRR8614329	SAMN10940358	Bos_taurus	PRJNA522422	Shoulder_Muscle_(Neck_muscle)	Muscle	Mixed/crossbred_NA	male	MISSING	98072400	97395544	0.993098	4842705594	4809613519
SRR8614331,SRR8614332	SAMN10940359	Bos_taurus	PRJNA522422	Liver	Liver	Mixed/crossbred_NA	male	MISSING	68517404	67732564	0.988545	3385083881	3346586389
SRR8614333,SRR8614220	SAMN10940360	Bos_taurus	PRJNA522422	Antirior_Pituitary	Pituitary	Mixed/crossbred_NA	male	MISSING	74243668	72749150	0.97987	3665156094	3591784303
SRR8614217,SRR8614218,SRR8614221	SAMN10940361	Bos_taurus	PRJNA522422	Median_Emminence_Hypothalamus	Hypothalamus	Mixed/crossbred_NA	male	MISSING	107750585	106817403	0.991339	5862585309	5813362718
SRR8614222,SRR8614225,SRR8614223	SAMN10940362	Bos_taurus	PRJNA522422	Small_Intestine	Small_Intestine	Mixed/crossbred_NA	male	MISSING	52711950	51563374	0.97821	2921950846	2860659238
SRR8614216,SRR8614224	SAMN10940363	Bos_taurus	PRJNA522422	Liver	Liver	Mixed/crossbred_NA	female	MISSING	64958234	63327468	0.974895	3209268218	3129047370
SRR8614374,SRR8614215,SRR8614373	SAMN10940364	Bos_taurus	PRJNA522422	Small_Intestine	Small_Intestine	Mixed/crossbred_NA	female	MISSING	49691721	48780781	0.981668	2753471467	2705189379
SRR8614371,SRR8614372	SAMN10940365	Bos_taurus	PRJNA522422	Antirior_Pituitary	Pituitary	Mixed/crossbred_NA	female	MISSING	76326678	75536892	0.989653	3768507827	3729821615
SRR8614377,SRR8614378	SAMN10940366	Bos_taurus	PRJNA522422	Median_Emminence_Hypothalamus	Hypothalamus	Mixed/crossbred_NA	female	MISSING	20515900	20326098	0.990749	1509711995	1497540946
SRR8614376,SRR8614375	SAMN10940367	Bos_taurus	PRJNA522422	Shoulder_Muscle_(Neck_muscle)	Muscle	Mixed/crossbred_NA	female	MISSING	90495118	89684194	0.991039	4467641378	4428215105
SRR8614369,SRR8614370	SAMN10940368	Bos_taurus	PRJNA522422	Shoulder_Muscle_(Neck_muscle)	Muscle	Mixed/crossbred_NA	female	MISSING	78973952	78334680	0.991905	3899583493	3868365545
SRR8614572,SRR8614590	SAMN10940369	Bos_taurus	PRJNA522422	Liver	Liver	Mixed/crossbred_NA	female	MISSING	69332606	68139514	0.982792	3424938178	3366289486
SRR8614570,SRR8614571,SRR8614577	SAMN10940370	Bos_taurus	PRJNA522422	Small_Intestine	Small_Intestine	Mixed/crossbred_NA	female	MISSING	54523108	53828650	0.987263	3019129773	2982723627
SRR8614574,SRR8614575	SAMN10940371	Bos_taurus	PRJNA522422	Antirior_Pituitary	Pituitary	Mixed/crossbred_NA	female	MISSING	73908032	72607380	0.982402	3646489897	3582793130
SRR8614576,SRR8614219,SRR8614573	SAMN10940372	Bos_taurus	PRJNA522422	Median_Emminence_Hypothalamus	Hypothalamus	Mixed/crossbred_NA	female	MISSING	87012645	86027485	0.988678	4822569997	4770597176
SRR8614702,SRR8614704	SAMN10940373	Bos_taurus	PRJNA522422	Shoulder_Muscle_(Neck_muscle)	Muscle	Hereford	male	MISSING	82516456	81878120	0.992264	4074545238	4043376883
SRR8614706,SRR8614705	SAMN10940374	Bos_taurus	PRJNA522422	Liver	Liver	Hereford	male	MISSING	76159650	75367942	0.989605	3763016653	3724200757
SRR8614700,SRR8614699,SRR8614701	SAMN10940375	Bos_taurus	PRJNA522422	Small_Intestine	Small_Intestine	Hereford	male	MISSING	64357425	63504589	0.986748	3554300288	3509649895
SRR8614703,SRR8614707	SAMN10940376	Bos_taurus	PRJNA522422	Antirior_Pituitary	Pituitary	Hereford	male	MISSING	63263144	62526922	0.988363	3122636521	3086618203
SRR8614629,SRR8614630,SRR8614712	SAMN10940377	Bos_taurus	PRJNA522422	Median_Emminence_Hypothalamus	Hypothalamus	Hereford	male	MISSING	70405982	69804864	0.991462	3928478299	3896942828
SRR8614628,SRR8614631	SAMN10940378	Bos_taurus	PRJNA522422	Shoulder_Muscle_(Neck_muscle)	Muscle	Hereford	male	MISSING	85120220	84549942	0.9933	4203118822	4175285637
SRR8614634,SRR8614633	SAMN10940379	Bos_taurus	PRJNA522422	Liver	Liver	Hereford	male	MISSING	88386442	87596196	0.991059	4366701588	4328029967
SRR8614632,SRR8614635,SRR8614636	SAMN10940380	Bos_taurus	PRJNA522422	Small_Intestine	Small_Intestine	Hereford	male	MISSING	55008736	53886850	0.979605	3051179792	2991520151
SRR8614503,SRR8614478	SAMN10940381	Bos_taurus	PRJNA522422	Antirior_Pituitary	Pituitary	Hereford	male	MISSING	110161214	108822372	0.987847	5438200794	5372544683
SRR8614477,SRR8614480,SRR8614479	SAMN10940382	Bos_taurus	PRJNA522422	Median_Emminence_Hypothalamus	Hypothalamus	Hereford	male	MISSING	76867433	76161643	0.990818	4269334062	4232516840
SRR8614482,SRR8614483	SAMN10940383	Bos_taurus	PRJNA522422	Shoulder_Muscle_(Neck_muscle)	Muscle	Hereford	male	MISSING	82967412	82391680	0.993061	4097007543	4068893240
SRR8614484,SRR8614485	SAMN10940384	Bos_taurus	PRJNA522422	Liver	Liver	Hereford	male	MISSING	77313232	76596974	0.990736	3819627807	3784597769
SRR8614487,SRR8614741,SRR8614486	SAMN10940385	Bos_taurus	PRJNA522422	Small_Intestine	Small_Intestine	Hereford	male	MISSING	58279085	57444145	0.985673	3225533209	3181577352
SRR8614275,SRR8614742	SAMN10940386	Bos_taurus	PRJNA522422	Antirior_Pituitary	Pituitary	Hereford	male	MISSING	92527702	91601268	0.989987	4567682396	4522309091
SRR8614276,SRR8614278,SRR8614277	SAMN10940387	Bos_taurus	PRJNA522422	Median_Emminence_Hypothalamus	Hypothalamus	Hereford	male	MISSING	79927619	79203409	0.990939	4444330672	4406394205
SRR8614279,SRR8614284	SAMN10940388	Bos_taurus	PRJNA522422	Shoulder_Muscle_(Neck_muscle)	Muscle	Hereford	male	MISSING	110874502	110104492	0.993055	5475148068	5437488928
SRR8614720,SRR8614719	SAMN10940389	Bos_taurus	PRJNA522422	Liver	Liver	Hereford	male	MISSING	88163578	87246498	0.989598	4355966783	4311094558
SRR8614761,SRR8614762,SRR8614764	SAMN10940390	Bos_taurus	PRJNA522422	Small_Intestine	Small_Intestine	Hereford	male	MISSING	53181417	52245125	0.982394	2941200505	2891654604
SRR8614760,SRR8614759	SAMN10940391	Bos_taurus	PRJNA522422	Antirior_Pituitary	Pituitary	Hereford	male	MISSING	72939376	72201940	0.98989	3600696488	3564600856
SRR8614756,SRR8614758,SRR8614757	SAMN10940392	Bos_taurus	PRJNA522422	Median_Emminence_Hypothalamus	Hypothalamus	Hereford	male	MISSING	73929943	73273225	0.991117	4096028494	4061593496
SRR8614763,SRR8614765	SAMN10940393	Bos_taurus	PRJNA522422	Shoulder_Muscle_(Neck_muscle)	Muscle	Hereford	male	MISSING	75110972	74412684	0.990703	3708610734	3674550179
SRR8614200,SRR8614204	SAMN10940394	Bos_taurus	PRJNA522422	Liver	Liver	Hereford	male	MISSING	77367322	76501658	0.988811	3822711721	3780391704
SRR8614554,SRR8614565,SRR8614550	SAMN10940395	Bos_taurus	PRJNA522422	Small_Intestine	Small_Intestine	Hereford	male	MISSING	62769291	61685897	0.98274	3471385928	3414280344
SRR8614549,SRR8614552	SAMN10940396	Bos_taurus	PRJNA522422	Antirior_Pituitary	Pituitary	Hereford	male	MISSING	95946522	94993644	0.990069	4736188352	4689510893
SRR8614490,SRR8614491,SRR8614595	SAMN10940397	Bos_taurus	PRJNA522422	Median_Emminence_Hypothalamus	Hypothalamus	Hereford	male	MISSING	82093671	81424341	0.991847	4537709755	4502881602
SRR8614422,SRR8614419	SAMN10940398	Bos_taurus	PRJNA522422	Shoulder_Muscle_(Neck_muscle)	Muscle	Hereford	male	MISSING	82304378	81680802	0.992424	4063946464	4033479966
SRR8614421,SRR8614423	SAMN10940399	Bos_taurus	PRJNA522422	Liver	Liver	Hereford	male	MISSING	77690506	76895434	0.989766	3838426386	3799485648
SRR8614416,SRR8614420,SRR8614614	SAMN10940400	Bos_taurus	PRJNA522422	Small_Intestine	Small_Intestine	Hereford	male	MISSING	56766588	55806792	0.983092	3136893871	3086275458
SRR8614393,SRR8614424	SAMN10940401	Bos_taurus	PRJNA522422	Antirior_Pituitary	Pituitary	Hereford	male	MISSING	81193034	80396550	0.99019	4008248398	3969255101
SRR8614197,SRR8614615	SAMN10940402	Bos_taurus	PRJNA522422	Median_Emminence_Hypothalamus	Hypothalamus	Hereford	male	MISSING	96204930	95037604	0.987866	5202765896	5141746908
SRR8614201,SRR8614196	SAMN10940409	Bos_taurus	PRJNA522422	Shoulder_Muscle_(Neck_muscle)	Muscle	Hereford	male	MISSING	132932598	131228522	0.987181	6560399860	6476465614
SRR8614202,SRR8614679	SAMN10940410	Bos_taurus	PRJNA522422	Liver	Liver	Hereford	male	MISSING	148427302	147613206	0.994515	7325976406	7285961801
SRR8614678,SRR8614677	SAMN10940411	Bos_taurus	PRJNA522422	Small_Intestine	Small_Intestine	Hereford	male	MISSING	115085492	113402856	0.985379	5677341148	5594486110
SRR8614683,SRR8614676	SAMN10940412	Bos_taurus	PRJNA522422	Antirior_Pituitary	Pituitary	Hereford	male	MISSING	123522302	122272832	0.989885	6095251323	6033765547
SRR8614682,SRR8614681	SAMN10940413	Bos_taurus	PRJNA522422	Median_Emminence_Hypothalamus	Hypothalamus	Hereford	male	MISSING	138678998	137013132	0.987988	6843351317	6761357066
SRR8614680,SRR8614685	SAMN10940414	Bos_taurus	PRJNA522422	Shoulder_Muscle_(Neck_muscle)	Muscle	Hereford	male	MISSING	113901676	112694514	0.989402	5620066888	5560661468
SRR8614684,SRR8614686	SAMN10940415	Bos_taurus	PRJNA522422	Liver	Liver	Hereford	male	MISSING	133797736	132878754	0.993132	6603845152	6558660025
SRR8614569,SRR8614691	SAMN10940416	Bos_taurus	PRJNA522422	Small_Intestine	Small_Intestine	Hereford	male	MISSING	154222430	151287686	0.980971	7609908907	7465307321
SRR8614697,SRR8614792	SAMN10940417	Bos_taurus	PRJNA522422	Antirior_Pituitary	Pituitary	Hereford	male	MISSING	127047818	126207740	0.993388	6268960740	6227679204
SRR8614795,SRR8614799	SAMN10940418	Bos_taurus	PRJNA522422	Median_Emminence_Hypothalamus	Hypothalamus	Hereford	male	MISSING	138451888	137691256	0.994506	6830041714	6792713671
SRR8614797,SRR8614354	SAMN10940419	Bos_taurus	PRJNA522422	Shoulder_Muscle_(Neck_muscle)	Muscle	Hereford	male	MISSING	115646218	114697620	0.991797	5707274564	5660610613
SRR8614527,SRR8614658	SAMN10940420	Bos_taurus	PRJNA522422	Liver	Liver	Hereford	male	MISSING	138183452	136871940	0.990509	6820939984	6756387602
SRR8614660,SRR8614656	SAMN10940421	Bos_taurus	PRJNA522422	Small_Intestine	Small_Intestine	Hereford	male	MISSING	105932050	104341552	0.984986	5225402015	5147098195
SRR8614489,SRR8614662	SAMN10940422	Bos_taurus	PRJNA522422	Antirior_Pituitary	Pituitary	Hereford	male	MISSING	130534476	129477694	0.991904	6441129230	6389152080
SRR8614661,SRR8614664	SAMN10940423	Bos_taurus	PRJNA522422	Median_Emminence_Hypothalamus	Hypothalamus	Hereford	male	MISSING	137995162	136244814	0.987316	6809788546	6723619697
SRR8614663,SRR8614653	SAMN10940424	Bos_taurus	PRJNA522422	Shoulder_Muscle_(Neck_muscle)	Muscle	Hereford	male	MISSING	133279536	132014056	0.990505	6577899976	6515642119
SRR8614652,SRR8614461	SAMN10940425	Bos_taurus	PRJNA522422	Liver	Liver	Hereford	male	MISSING	135154424	133752462	0.989627	6670899071	6601896022
SRR8614460,SRR8614463	SAMN10940426	Bos_taurus	PRJNA522422	Small_Intestine	Small_Intestine	Hereford	male	MISSING	139554764	138161190	0.990014	6886981954	6818379138
SRR8614462,SRR8614465	SAMN10940427	Bos_taurus	PRJNA522422	Antirior_Pituitary	Pituitary	Hereford	male	MISSING	165130790	164163206	0.99414	8148362371	8100824354
SRR8614464,SRR8614539	SAMN10940428	Bos_taurus	PRJNA522422	Median_Emminence_Hypothalamus	Hypothalamus	Hereford	male	MISSING	144277434	143299536	0.993222	7119792903	7071740679
SRR8614447,SRR8614530	SAMN10940429	Bos_taurus	PRJNA522422	Shoulder_Muscle_(Neck_muscle)	Muscle	Hereford	male	MISSING	135375754	134191552	0.991252	6681023745	6622739657
SRR8614446,SRR8614347	SAMN10940430	Bos_taurus	PRJNA522422	Liver	Liver	Hereford	male	MISSING	122662360	121479602	0.990358	6054241508	5996048949
SRR8614654,SRR8614604	SAMN10940431	Bos_taurus	PRJNA522422	Small_Intestine	Small_Intestine	Hereford	male	MISSING	180789054	177805550	0.983497	8922689127	8775669834
SRR8614406,SRR8614365	SAMN10940432	Bos_taurus	PRJNA522422	Antirior_Pituitary	Pituitary	Hereford	male	MISSING	127667864	126389052	0.989983	6299771182	6236846461
SRR8614390,SRR8614407	SAMN10940433	Bos_taurus	PRJNA522422	Median_Emminence_Hypothalamus	Hypothalamus	Hereford	male	MISSING	131268010	129490698	0.98646	6477695778	6390196245
SRR8614404,SRR8614770	SAMN10940434	Bos_taurus	PRJNA522422	Shoulder_Muscle_(Neck_muscle)	Muscle	Hereford	male	MISSING	121293686	120056412	0.989799	5986117851	5925211165
SRR8614558,SRR8614771	SAMN10940435	Bos_taurus	PRJNA522422	Liver	Liver	Hereford	male	MISSING	124504556	123368388	0.990874	6145695248	6089792704
SRR8614556,SRR8614553	SAMN10940436	Bos_taurus	PRJNA522422	Small_Intestine	Small_Intestine	Hereford	male	MISSING	124688178	122622328	0.983432	6153098466	6051345851
SRR8614617,SRR8614266	SAMN10940437	Bos_taurus	PRJNA522422	Antirior_Pituitary	Pituitary	Hereford	male	MISSING	127916574	126607064	0.989763	6312221734	6247792866
SRR8614425,SRR8614541	SAMN10940438	Bos_taurus	PRJNA522422	Median_Emminence_Hypothalamus	Hypothalamus	Hereford	male	MISSING	145119040	144083168	0.992862	7161441530	7110511666
SRR8753302,SRR8753307	SAMN11168492	Bos_taurus	PRJNA528040	Mesenteric_fat	Adipose	NA	male	NA	108348716	106615272	0.984001	8111850063	7993164277
SRR11569385,SRR11569386,SRR11569387,SRR11569388	SAMN14641589	Bos_taurus_x_Bos_indicus	PRJNA626458	Brain	Brain	NA	female	fetus	61654001	60668941	0.984023	4606731608	4537558659
SRR11569381,SRR11569382,SRR11569383,SRR11569384	SAMN14641590	Bos_taurus	PRJNA626458	Brain	Brain	NA	male	fetus	51711466	51101066	0.988196	3866108195	3823639164
SRR11569373,SRR11569374,SRR11569375,SRR11569376,SRR11569377,SRR11569378,SRR11569379,SRR11569380	SAMN14641591	Bos_taurus_x_Bos_indicus	PRJNA626458	Brain	Brain	NA	female	fetus	78538561	77572237	0.987696	5880909612	5813634059
SRR11569365,SRR11569366,SRR11569367,SRR11569368,SRR11569369,SRR11569370,SRR11569371,SRR11569372	SAMN14641592	Bos_indicus	PRJNA626458	Brain	Brain	NA	female	fetus	276002808	267299282	0.968466	20626376184	20019535969
SRR11569361,SRR11569362,SRR11569363,SRR11569364	SAMN14641593	Bos_taurus_x_Bos_indicus	PRJNA626458	Brain	Brain	NA	male	fetus	120633184	119059126	0.986952	9029323930	8918559618
SRR11569357,SRR11569358,SRR11569359,SRR11569360	SAMN14641594	Bos_taurus	PRJNA626458	Brain	Brain	NA	female	fetus	96402492	94606988	0.981375	7209211942	7083349629
SRR11569353,SRR11569354,SRR11569355,SRR11569356	SAMN14641595	Bos_indicus	PRJNA626458	Brain	Brain	NA	male	fetus	101973878	100450130	0.985057	7634164741	7526320104
SRR11569349,SRR11569350,SRR11569351,SRR11569352	SAMN14641596	Bos_taurus	PRJNA626458	Brain	Brain	NA	female	fetus	74709930	73938832	0.989679	5594190058	5540627453
SRR11569345,SRR11569346,SRR11569347,SRR11569348	SAMN14641597	Bos_indicus	PRJNA626458	Brain	Brain	NA	female	fetus	102999000	101230622	0.982831	7708270876	7585632352
SRR11569341,SRR11569342,SRR11569343,SRR11569344	SAMN14641598	Bos_taurus_x_Bos_indicus	PRJNA626458	Brain	Brain	NA	female	fetus	73075438	71329378	0.976106	5460158821	5339505846
SRR11569334,SRR11569335,SRR11569336,SRR11569337,SRR11569338,SRR11569339,SRR11569340	SAMN14641599	Bos_taurus_x_Bos_indicus	PRJNA626458	Brain	Brain	NA	female	fetus	58880361	58060001	0.986067	4408054577	4350658809
SRR11569537,SRR11569538,SRR11569539,SRR11569540,SRR11569541	SAMN14641600	Bos_indicus	PRJNA626458	Liver	Liver	NA	male	fetus	97753898	89905170	0.919709	9633934869	8862268338
SRR11569532,SRR11569533,SRR11569534,SRR11569535,SRR11569536	SAMN14641601	Bos_taurus	PRJNA626458	Liver	Liver	NA	female	fetus	99210141	91943749	0.926758	9759733558	9056469130
SRR11569527,SRR11569528,SRR11569529,SRR11569530,SRR11569531	SAMN14641602	Bos_indicus	PRJNA626458	Liver	Liver	NA	female	fetus	104261083	95566559	0.916608	10259430116	9412936574
SRR11569522,SRR11569523,SRR11569524,SRR11569525,SRR11569526	SAMN14641603	Bos_taurus_x_Bos_indicus	PRJNA626458	Liver	Liver	NA	female	fetus	92239070	85736210	0.9295	9078701193	8446937584
SRR11569517,SRR11569518,SRR11569519,SRR11569520,SRR11569521	SAMN14641604	Bos_taurus_x_Bos_indicus	PRJNA626458	Liver	Liver	NA	female	fetus	92055362	84360902	0.916415	9063214755	8310498603
SRR11569505,SRR11569506,SRR11569507,SRR11569508,SRR11569509,SRR11569510,SRR11569511,SRR11569512,SRR11569513,SRR11569514,SRR11569515,SRR11569516	SAMN14641605	Bos_taurus_x_Bos_indicus	PRJNA626458	Brain	Brain	NA	female	fetus	67812805	65273777	0.962558	5074150359	4890654254
SRR11569547,SRR11569548,SRR11569549,SRR11569550,SRR11569551	SAMN14641606	Bos_taurus_x_Bos_indicus	PRJNA626458	Liver	Liver	NA	male	fetus	101325020	94268282	0.930355	9991918748	9295873420
SRR11569493,SRR11569494,SRR11569495,SRR11569496,SRR11569497,SRR11569498,SRR11569499,SRR11569500,SRR11569501,SRR11569502,SRR11569503,SRR11569504	SAMN14641607	Bos_taurus_x_Bos_indicus	PRJNA626458	Brain	Brain	NA	male	fetus	82878955	81063351	0.978093	6205774090	6074998838
SRR11569796,SRR11569797,SRR11569798,SRR11569799,SRR11569800,SRR11569801,SRR11569802,SRR11569803	SAMN14641608	Bos_taurus_x_Bos_indicus	PRJNA626458	Lung	Lung	NA	male	fetus	54738256	54402019	0.993857	4094355897	4072810569
SRR11569788,SRR11569789,SRR11569790,SRR11569791,SRR11569792,SRR11569793,SRR11569794,SRR11569795	SAMN14641609	Bos_taurus_x_Bos_indicus	PRJNA626458	Lung	Lung	NA	male	fetus	61936709	61521163	0.993291	4632845258	4606487895
SRR11569780,SRR11569781,SRR11569782,SRR11569783,SRR11569784,SRR11569785,SRR11569786,SRR11569787	SAMN14641610	Bos_indicus	PRJNA626458	Lung	Lung	NA	male	fetus	60606565	59878994	0.987995	4501027736	4457366649
SRR11569772,SRR11569773,SRR11569774,SRR11569775,SRR11569776,SRR11569777,SRR11569778,SRR11569779	SAMN14641611	Bos_taurus_x_Bos_indicus	PRJNA626458	Lung	Lung	NA	male	fetus	53807809	53502113	0.994319	4024412180	4004743815
SRR11569764,SRR11569765,SRR11569766,SRR11569767,SRR11569768,SRR11569769,SRR11569770,SRR11569771	SAMN14641612	Bos_taurus_x_Bos_indicus	PRJNA626458	Lung	Lung	NA	male	fetus	66217442	65810149	0.993849	4953100718	4927289041
SRR11569756,SRR11569757,SRR11569758,SRR11569759,SRR11569760,SRR11569761,SRR11569762,SRR11569763	SAMN14641613	Bos_indicus	PRJNA626458	Lung	Lung	NA	female	fetus	66431820	65935481	0.992529	4966748964	4935114312
SRR11569748,SRR11569749,SRR11569750,SRR11569751,SRR11569752,SRR11569753,SRR11569754,SRR11569755	SAMN14641614	Bos_taurus_x_Bos_indicus	PRJNA626458	Lung	Lung	NA	female	fetus	66822205	66390899	0.993545	4995382392	4968250051
SRR11569740,SRR11569741,SRR11569742,SRR11569743,SRR11569744,SRR11569745,SRR11569746,SRR11569747	SAMN14641615	Bos_taurus	PRJNA626458	Lung	Lung	NA	male	fetus	63881224	63525947	0.994438	4776437284	4754088422
SRR11569732,SRR11569733,SRR11569734,SRR11569735,SRR11569736,SRR11569737,SRR11569738,SRR11569739	SAMN14641616	Bos_taurus	PRJNA626458	Lung	Lung	NA	female	fetus	60938030	60490374	0.992654	4546443868	4519208608
SRR11569481,SRR11569482,SRR11569483,SRR11569484,SRR11569485,SRR11569486,SRR11569487,SRR11569488,SRR11569489,SRR11569490,SRR11569491,SRR11569492	SAMN14641617	Bos_taurus_x_Bos_indicus	PRJNA626458	Brain	Brain	NA	male	fetus	58211838	57226010	0.983065	4359051329	4288983409
SRR11569469,SRR11569470,SRR11569471,SRR11569472,SRR11569473,SRR11569474,SRR11569475,SRR11569476,SRR11569477,SRR11569478,SRR11569479,SRR11569480	SAMN14641618	Bos_taurus_x_Bos_indicus	PRJNA626458	Brain	Brain	NA	male	fetus	99687241	97565531	0.978716	7460417987	7310455588
SRR11569461,SRR11569462,SRR11569463,SRR11569464,SRR11569465,SRR11569466,SRR11569467,SRR11569468	SAMN14641619	Bos_indicus	PRJNA626458	Brain	Brain	NA	male	fetus	91218022	89225374	0.978155	6829945611	6688787329
SRR11569449,SRR11569450,SRR11569451,SRR11569452,SRR11569453,SRR11569454,SRR11569455,SRR11569456,SRR11569457,SRR11569458,SRR11569459,SRR11569460	SAMN14641620	Bos_taurus_x_Bos_indicus	PRJNA626458	Brain	Brain	NA	male	fetus	43402185	40085041	0.923572	3214301866	2992390960
SRR11569441,SRR11569442,SRR11569443,SRR11569444,SRR11569445,SRR11569446,SRR11569447,SRR11569448	SAMN14641621	Bos_taurus_x_Bos_indicus	PRJNA626458	Brain	Brain	NA	male	fetus	88390135	86619089	0.979963	6616769359	6491378958
SRR11569433,SRR11569434,SRR11569435,SRR11569436,SRR11569437,SRR11569438,SRR11569439,SRR11569440	SAMN14641622	Bos_indicus	PRJNA626458	Brain	Brain	NA	female	fetus	92151915	90354619	0.980496	6898432548	6772356333
SRR11569425,SRR11569426,SRR11569427,SRR11569428,SRR11569429,SRR11569430,SRR11569431,SRR11569432	SAMN14641623	Bos_taurus_x_Bos_indicus	PRJNA626458	Brain	Brain	NA	female	fetus	91192017	89697075	0.983607	6821289548	6716650732
SRR11569417,SRR11569418,SRR11569419,SRR11569420,SRR11569421,SRR11569422,SRR11569423,SRR11569424	SAMN14641624	Bos_taurus	PRJNA626458	Brain	Brain	NA	male	fetus	63067676	62225142	0.986641	4722000584	4662622775
SRR11569405,SRR11569406,SRR11569407,SRR11569408,SRR11569409,SRR11569410,SRR11569411,SRR11569412,SRR11569413,SRR11569414,SRR11569415,SRR11569416	SAMN14641625	Bos_indicus	PRJNA626458	Brain	Brain	NA	male	fetus	52019592	50447332	0.969776	3892446236	3780024003
SRR11569397,SRR11569398,SRR11569399,SRR11569400,SRR11569401,SRR11569402,SRR11569403,SRR11569404	SAMN14641626	Bos_taurus	PRJNA626458	Brain	Brain	NA	female	fetus	65037940	63925506	0.982896	4868651297	4789623414
SRR11569389,SRR11569390,SRR11569391,SRR11569392,SRR11569393,SRR11569394,SRR11569395,SRR11569396	SAMN14641627	Bos_taurus	PRJNA626458	Brain	Brain	NA	male	fetus	117693181	115963819	0.985306	8794825120	8678206491
SRR11569832,SRR11569833	SAMN14641629	Bos_taurus_x_Bos_indicus	PRJNA626458	Muscle	Muscle	NA	male	fetus	113275042	102595380	0.905719	10887278034	9898362925
SRR11569827,SRR11569828	SAMN14641633	Bos_taurus	PRJNA626458	Muscle	Muscle	NA	male	fetus	132618779	124389977	0.937951	12802776549	12029040394
SRR11569824,SRR11569825	SAMN14641635	Bos_taurus	PRJNA626458	Muscle	Muscle	NA	male	fetus	95280385	88348963	0.927252	9165663222	8523574836
SRR11569814,SRR11569815	SAMN14641644	Bos_indicus	PRJNA626458	Muscle	Muscle	NA	female	fetus	106465972	95482776	0.896838	10256145746	9232510466
SRR11569804,SRR11569805,SRR11569806,SRR11569807,SRR11569808,SRR11569809,SRR11569810,SRR11569811	SAMN14641647	Bos_taurus_x_Bos_indicus	PRJNA626458	Lung	Lung	NA	female	fetus	60391595	60022733	0.993892	4518060436	4494605467
SRR11569985,SRR11569986,SRR11569987,SRR11569988,SRR11569989,SRR11569990,SRR11569991,SRR11569992	SAMN14641648	Bos_indicus	PRJNA626458	Placenta	Placenta	NA	female	fetus	77217462	75165618	0.973428	5773089542	5631918941
SRR11569977,SRR11569978,SRR11569979,SRR11569980,SRR11569981,SRR11569982,SRR11569983,SRR11569984	SAMN14641649	Bos_taurus_x_Bos_indicus	PRJNA626458	Placenta	Placenta	NA	female	fetus	75072095	74623112	0.994019	5610538830	5582287074
SRR11569969,SRR11569970,SRR11569971,SRR11569972,SRR11569973,SRR11569974,SRR11569975,SRR11569976	SAMN14641650	Bos_taurus	PRJNA626458	Placenta	Placenta	NA	male	fetus	76094030	74388416	0.977585	5697361360	5576488138
SRR11569961,SRR11569962,SRR11569963,SRR11569964,SRR11569965,SRR11569966,SRR11569967,SRR11569968	SAMN14641651	Bos_indicus	PRJNA626458	Placenta	Placenta	NA	male	fetus	64685175	64276659	0.993685	4836033505	4810334264
SRR11569949,SRR11569950,SRR11569951,SRR11569952,SRR11569953,SRR11569954,SRR11569955,SRR11569956,SRR11569957,SRR11569958,SRR11569959,SRR11569960	SAMN14641652	Bos_taurus	PRJNA626458	Placenta	Placenta	NA	female	fetus	71487961	69743707	0.975601	5342253141	5225766514
SRR11569941,SRR11569942,SRR11569943,SRR11569944,SRR11569945,SRR11569946,SRR11569947,SRR11569948	SAMN14641653	Bos_taurus	PRJNA626458	Placenta	Placenta	NA	male	fetus	60667375	59113911	0.974394	4530708264	4427120930
SRR11569933,SRR11569934,SRR11569935,SRR11569936,SRR11569937,SRR11569938,SRR11569939,SRR11569940	SAMN14641654	Bos_taurus_x_Bos_indicus	PRJNA626458	Placenta	Placenta	NA	female	fetus	55235230	53643008	0.971174	4129685514	4020138009
SRR11569921,SRR11569922,SRR11569923,SRR11569924,SRR11569925,SRR11569926,SRR11569927,SRR11569928,SRR11569929,SRR11569930,SRR11569931,SRR11569932	SAMN14641655	Bos_taurus	PRJNA626458	Placenta	Placenta	NA	male	fetus	107941071	100799177	0.933835	8077947530	7556394914
SRR11569913,SRR11569914,SRR11569915,SRR11569916,SRR11569917,SRR11569918,SRR11569919,SRR11569920	SAMN14641656	Bos_taurus_x_Bos_indicus	PRJNA626458	Placenta	Placenta	NA	female	fetus	59643110	58438554	0.979804	4463828227	4380449118
SRR11569901,SRR11569902,SRR11569903,SRR11569904,SRR11569905,SRR11569906,SRR11569907,SRR11569908,SRR11569909,SRR11569910,SRR11569911,SRR11569912	SAMN14641657	Bos_indicus	PRJNA626458	Placenta	Placenta	NA	female	fetus	55790932	53795976	0.964242	4174624370	4031157826
SRR11569893,SRR11569894,SRR11569895,SRR11569896,SRR11569897,SRR11569898,SRR11569899,SRR11569900	SAMN14641658	Bos_taurus_x_Bos_indicus	PRJNA626458	Placenta	Placenta	NA	male	fetus	105549542	103839914	0.983803	7900086197	7782768565
SRR11569885,SRR11569886,SRR11569887,SRR11569888,SRR11569889,SRR11569890,SRR11569891,SRR11569892	SAMN14641659	Bos_taurus	PRJNA626458	Placenta	Placenta	NA	female	fetus	74127350	73773557	0.995227	5542322496	5520241021
SRR11569877,SRR11569878,SRR11569879,SRR11569880,SRR11569881,SRR11569882,SRR11569883,SRR11569884	SAMN14641660	Bos_indicus	PRJNA626458	Placenta	Placenta	NA	male	fetus	73475642	72986313	0.99334	5491945629	5460704142
SRR11569869,SRR11569870,SRR11569871,SRR11569872,SRR11569873,SRR11569874,SRR11569875,SRR11569876	SAMN14641661	Bos_taurus	PRJNA626458	Placenta	Placenta	NA	female	fetus	57607130	56344630	0.978084	4305050314	4218779898
SRR11569857,SRR11569858,SRR11569859,SRR11569860,SRR11569861,SRR11569862,SRR11569863,SRR11569864,SRR11569865,SRR11569866,SRR11569867,SRR11569868	SAMN14641662	Bos_indicus	PRJNA626458	Placenta	Placenta	NA	female	fetus	75376797	73675823	0.977434	5646162399	5526064867
SRR11569849,SRR11569850,SRR11569851,SRR11569852,SRR11569853,SRR11569854,SRR11569855,SRR11569856	SAMN14641663	Bos_taurus_x_Bos_indicus	PRJNA626458	Placenta	Placenta	NA	female	fetus	58754155	57332559	0.975804	4394353588	4296698199
SRR11569841,SRR11569842,SRR11569843,SRR11569844,SRR11569845,SRR11569846,SRR11569847,SRR11569848	SAMN14641664	Bos_taurus_x_Bos_indicus	PRJNA626458	Placenta	Placenta	NA	female	fetus	60323067	59004411	0.97814	4507873489	4417912179
SRR11569838,SRR11569839	SAMN14641666	Bos_taurus_x_Bos_indicus	PRJNA626458	Muscle	Muscle	NA	male	fetus	107810560	98031306	0.909292	10400939610	9485760669
SRR11569835,SRR11569836	SAMN14641668	Bos_taurus_x_Bos_indicus	PRJNA626458	Muscle	Muscle	NA	male	fetus	117026726	107057610	0.914813	11272424126	10340654766
SRR11569618,SRR11569619,SRR11569620,SRR11569621,SRR11569622	SAMN14641669	Bos_taurus_x_Bos_indicus	PRJNA626458	Liver	Liver	NA	male	fetus	83083579	75777725	0.912066	8178780407	7463683301
SRR11569613,SRR11569614,SRR11569615,SRR11569616,SRR11569617	SAMN14641670	Bos_taurus_x_Bos_indicus	PRJNA626458	Liver	Liver	NA	male	fetus	80970653	72344359	0.893464	7980907947	7129929944
SRR11569608,SRR11569609,SRR11569610,SRR11569611,SRR11569612	SAMN14641671	Bos_taurus_x_Bos_indicus	PRJNA626458	Liver	Liver	NA	male	fetus	92448480	84714874	0.916347	9113998448	8352774237
SRR11569603,SRR11569604,SRR11569605,SRR11569606,SRR11569607	SAMN14641672	Bos_indicus	PRJNA626458	Liver	Liver	NA	male	fetus	107391352	99683976	0.928231	10577013338	9821858009
SRR11569598,SRR11569599,SRR11569600,SRR11569601,SRR11569602	SAMN14641673	Bos_taurus_x_Bos_indicus	PRJNA626458	Liver	Liver	NA	male	fetus	109975331	100549673	0.914293	10835177149	9909471762
SRR11569593,SRR11569594,SRR11569595,SRR11569596,SRR11569597	SAMN14641674	Bos_taurus_x_Bos_indicus	PRJNA626458	Liver	Liver	NA	male	fetus	109810781	99156427	0.902975	10812237769	9767474947
SRR11569588,SRR11569589,SRR11569590,SRR11569591,SRR11569592	SAMN14641675	Bos_indicus	PRJNA626458	Liver	Liver	NA	female	fetus	88989918	80609612	0.905829	8765334101	7943713831
SRR11569583,SRR11569584,SRR11569585,SRR11569586,SRR11569587	SAMN14641676	Bos_taurus_x_Bos_indicus	PRJNA626458	Liver	Liver	NA	female	fetus	105372173	96530803	0.916094	10362441337	9500783258
SRR11569576,SRR11569577,SRR11569578,SRR11569579,SRR11569580	SAMN14641679	Bos_taurus	PRJNA626458	Liver	Liver	NA	female	fetus	95393910	83810150	0.878569	9395660395	8254474520
SRR11569571,SRR11569572,SRR11569573,SRR11569574,SRR11569575	SAMN14641680	Bos_taurus	PRJNA626458	Liver	Liver	NA	male	fetus	99634370	91165810	0.915004	9819993928	8987205539
SRR11569566,SRR11569567,SRR11569568,SRR11569569,SRR11569570	SAMN14641681	Bos_taurus_x_Bos_indicus	PRJNA626458	Liver	Liver	NA	female	fetus	77164118	70647840	0.915553	7605637767	6964991460
SRR11569561,SRR11569562,SRR11569563,SRR11569564,SRR11569565	SAMN14641682	Bos_taurus	PRJNA626458	Liver	Liver	NA	male	fetus	77415135	70475963	0.910364	7632632173	6948484036
SRR11569557,SRR11569558,SRR11569559,SRR11569560	SAMN14641683	Bos_taurus_x_Bos_indicus	PRJNA626458	Liver	Liver	NA	female	fetus	79411524	71981840	0.906441	7827703378	7095172315
SRR11569552,SRR11569553,SRR11569554,SRR11569555,SRR11569556	SAMN14641684	Bos_indicus	PRJNA626458	Liver	Liver	NA	female	fetus	112475896	103085340	0.916511	11085450270	10162046681
SRR11569542,SRR11569543,SRR11569544,SRR11569545,SRR11569546	SAMN14641685	Bos_taurus	PRJNA626458	Liver	Liver	NA	female	fetus	201079059	179366211	0.892018	19813569901	17671000477
SRR11570029,SRR11570030,SRR11570031,SRR11570032,SRR11570033,SRR11570034,SRR11570035,SRR11570036	SAMN14641686	Bos_taurus_x_Bos_indicus	PRJNA626458	Placenta	Placenta	NA	female	fetus	58958916	56159750	0.952523	4408003056	4206858006
SRR11570025,SRR11570026,SRR11570027,SRR11570028	SAMN14641687	Bos_taurus_x_Bos_indicus	PRJNA626458	Placenta	Placenta	NA	male	fetus	44634998	42358846	0.949005	3333029875	3172426223
SRR11570017,SRR11570018,SRR11570019,SRR11570020,SRR11570021,SRR11570022,SRR11570023,SRR11570024	SAMN14641688	Bos_taurus_x_Bos_indicus	PRJNA626458	Placenta	Placenta	NA	male	fetus	56352093	55789047	0.990008	4193108518	4159610593
SRR11570009,SRR11570010,SRR11570011,SRR11570012,SRR11570013,SRR11570014,SRR11570015,SRR11570016	SAMN14641689	Bos_indicus	PRJNA626458	Placenta	Placenta	NA	male	fetus	78855718	78356571	0.99367	5889859233	5857980365
SRR11570001,SRR11570002,SRR11570003,SRR11570004,SRR11570005,SRR11570006,SRR11570007,SRR11570008	SAMN14641690	Bos_taurus_x_Bos_indicus	PRJNA626458	Placenta	Placenta	NA	male	fetus	71702679	70344539	0.981059	5365278567	5271759527
SRR11569993,SRR11569994,SRR11569995,SRR11569996,SRR11569997,SRR11569998,SRR11569999,SRR11570000	SAMN14641691	Bos_taurus_x_Bos_indicus	PRJNA626458	Placenta	Placenta	NA	male	fetus	65476059	65069179	0.993786	4893293586	4867792883
SRR11569724,SRR11569725,SRR11569726,SRR11569727,SRR11569728,SRR11569729,SRR11569730,SRR11569731	SAMN14641692	Bos_taurus	PRJNA626458	Lung	Lung	NA	male	fetus	63960533	63631401	0.994854	4786824883	4765949111
SRR11569716,SRR11569717,SRR11569718,SRR11569719,SRR11569720,SRR11569721,SRR11569722,SRR11569723	SAMN14641693	Bos_taurus_x_Bos_indicus	PRJNA626458	Lung	Lung	NA	female	fetus	64248393	63837692	0.993608	4805778334	4779824473
SRR11569708,SRR11569709,SRR11569710,SRR11569711,SRR11569712,SRR11569713,SRR11569714,SRR11569715	SAMN14641694	Bos_taurus	PRJNA626458	Lung	Lung	NA	male	fetus	64631417	64261237	0.994272	4832608924	4809259816
SRR11569700,SRR11569701,SRR11569702,SRR11569703,SRR11569704,SRR11569705,SRR11569706,SRR11569707	SAMN14641695	Bos_taurus_x_Bos_indicus	PRJNA626458	Lung	Lung	NA	female	fetus	63744042	63385954	0.994382	4770633407	4747760579
SRR11569688,SRR11569689,SRR11569690,SRR11569691,SRR11569692,SRR11569693,SRR11569694,SRR11569695,SRR11569696,SRR11569697,SRR11569698,SRR11569699	SAMN14641696	Bos_indicus	PRJNA626458	Lung	Lung	NA	female	fetus	54474018	53982891	0.990984	4075968032	4043231804
SRR11569680,SRR11569681,SRR11569682,SRR11569683,SRR11569684,SRR11569685,SRR11569686,SRR11569687	SAMN14641697	Bos_taurus_x_Bos_indicus	PRJNA626458	Lung	Lung	NA	male	fetus	55715551	55416857	0.994639	4172003705	4152697221
SRR11569672,SRR11569673,SRR11569674,SRR11569675,SRR11569676,SRR11569677,SRR11569678,SRR11569679	SAMN14641698	Bos_taurus	PRJNA626458	Lung	Lung	NA	female	fetus	62424359	62082388	0.994522	4669389834	4647781069
SRR11569664,SRR11569665,SRR11569666,SRR11569667,SRR11569668,SRR11569669,SRR11569670,SRR11569671	SAMN14641699	Bos_indicus	PRJNA626458	Lung	Lung	NA	male	fetus	60372133	60004997	0.993919	4514530214	4490744853
SRR11569656,SRR11569657,SRR11569658,SRR11569659,SRR11569660,SRR11569661,SRR11569662,SRR11569663	SAMN14641700	Bos_taurus	PRJNA626458	Lung	Lung	NA	female	fetus	58810614	58483439	0.994437	4399386693	4378586337
SRR11569644,SRR11569645,SRR11569646,SRR11569647,SRR11569648,SRR11569649,SRR11569650,SRR11569651,SRR11569652,SRR11569653,SRR11569654,SRR11569655	SAMN14641701	Bos_indicus	PRJNA626458	Lung	Lung	NA	female	fetus	215905341	211833631	0.981141	16155325483	15870533635
SRR11569636,SRR11569637,SRR11569638,SRR11569639,SRR11569640,SRR11569641,SRR11569642,SRR11569643	SAMN14641702	Bos_taurus_x_Bos_indicus	PRJNA626458	Lung	Lung	NA	female	fetus	56689497	56375346	0.994458	4238458192	4218035850
SRR11569628,SRR11569629,SRR11569630,SRR11569631,SRR11569632,SRR11569633,SRR11569634,SRR11569635	SAMN14641703	Bos_taurus_x_Bos_indicus	PRJNA626458	Lung	Lung	NA	female	fetus	63107220	62722622	0.993906	4720392980	4695821707
SRR11569623,SRR11569624,SRR11569625,SRR11569626,SRR11569627	SAMN14641704	Bos_taurus_x_Bos_indicus	PRJNA626458	Liver	Liver	NA	female	fetus	86934599	78999755	0.908726	8572447237	7789214018
SRR17319913,SRR17319914	SAMN24366005	Bos_taurus	PRJNA791899	Whole_blood	Whole_blood	Holstein	NA	NA	35856359	35568025	0.991959	3604193523	3575654043
SRR17319915,SRR17319916	SAMN24366006	Bos_taurus	PRJNA791899	Whole_blood	Whole_blood	Holstein	NA	NA	29861033	29673124	0.993707	3002738964	2985088744
SRR17319917,SRR17319918	SAMN24366007	Bos_taurus	PRJNA791899	Whole_blood	Whole_blood	Holstein	NA	NA	33197406	32919424	0.991626	3337908025	3311475610
SRR17319919,SRR17319920	SAMN24366008	Bos_taurus	PRJNA791899	Whole_blood	Whole_blood	Holstein	NA	NA	38545272	38189616	0.990773	3874084815	3839039631
SRR17319921,SRR17319922	SAMN24366009	Bos_taurus	PRJNA791899	Whole_blood	Whole_blood	Holstein	NA	NA	42047859	40204084	0.956151	4183106531	4037065578
SRR17319923,SRR17319924	SAMN24366010	Bos_taurus	PRJNA791899	Whole_blood	Whole_blood	Holstein	NA	NA	38932995	38484211	0.988473	3912860137	3868212625
SRR17319925,SRR17319934	SAMN24366011	Bos_taurus	PRJNA791899	Whole_blood	Whole_blood	Holstein	NA	NA	40941884	40504858	0.989326	4115200486	4071751593
SRR17319926,SRR17319927	SAMN24366012	Bos_taurus	PRJNA791899	Whole_blood	Whole_blood	Holstein	NA	NA	30278335	29981648	0.990201	3042610954	3015534578
SRR17319928,SRR17319933	SAMN24366013	Bos_taurus	PRJNA791899	Whole_blood	Whole_blood	Holstein	NA	NA	31439651	31259840	0.994281	3162306871	3145114252
SRR17319929,SRR17319930	SAMN24366014	Bos_taurus	PRJNA791899	Whole_blood	Whole_blood	Holstein	NA	NA	34350169	34062291	0.991619	3452739395	3424188896
SRR17319931,SRR17319932	SAMN24366015	Bos_taurus	PRJNA791899	Whole_blood	Whole_blood	Holstein	NA	NA	39224225	38863492	0.990803	3941824946	3906044176
SRR17319935,SRR17319936	SAMN24366016	Bos_taurus	PRJNA791899	Whole_blood	Whole_blood	Holstein	NA	NA	37955387	37553691	0.989417	3815281388	3775261380
SRR17319937,SRR17319938	SAMN24366017	Bos_taurus	PRJNA791899	Whole_blood	Whole_blood	Holstein	NA	NA	32351493	31847010	0.984406	3248752362	3204225262
SRR17319939,SRR17319940	SAMN24366018	Bos_taurus	PRJNA791899	Whole_blood	Whole_blood	Holstein	NA	NA	39762741	39347295	0.989552	3995570405	3954764795
SRR17319943,SRR17319944	SAMN24366019	Bos_taurus	PRJNA791899	Whole_blood	Whole_blood	Holstein	NA	NA	30660848	30440481	0.992813	3083496617	3062222855
SRR17319955,SRR17319956	SAMN24366020	Bos_taurus	PRJNA791899	Whole_blood	Whole_blood	Holstein	NA	NA	32543137	32284469	0.992052	3271371024	3247224546
SRR17319941,SRR17319942	SAMN24366021	Bos_taurus	PRJNA791899	Whole_blood	Whole_blood	Holstein	NA	NA	31907309	31604101	0.990497	3207644348	3179164393
SRR17319945,SRR17319954	SAMN24366022	Bos_taurus	PRJNA791899	Whole_blood	Whole_blood	Holstein	NA	NA	41833682	41338242	0.988157	4204822969	4155487742
SRR17319946,SRR17319947	SAMN24366023	Bos_taurus	PRJNA791899	Whole_blood	Whole_blood	Holstein	NA	NA	28975468	28684323	0.989952	2911708915	2885032492
SRR17319948,SRR17319953	SAMN24366024	Bos_taurus	PRJNA791899	Whole_blood	Whole_blood	Holstein	NA	NA	38199908	37831247	0.990349	3840234588	3803576435
SRR17319949,SRR17319950	SAMN24366025	Bos_taurus	PRJNA791899	Whole_blood	Whole_blood	Holstein	NA	NA	27778755	27587904	0.99313	2791906010	2774342661
SRR17319951,SRR17319952	SAMN24366026	Bos_taurus	PRJNA791899	Whole_blood	Whole_blood	Holstein	NA	NA	29400963	29247672	0.994786	2956848008	2942510961
SRR17319957,SRR17319958	SAMN24366027	Bos_taurus	PRJNA791899	Whole_blood	Whole_blood	Holstein	NA	NA	25456685	25281849	0.993132	2559317664	2542965346
SRR17319959,SRR17319960	SAMN24366028	Bos_taurus	PRJNA791899	Whole_blood	Whole_blood	Holstein	NA	NA	36270040	35907648	0.990009	3645404973	3609396372
SRR10062492	SAMN12685260	Bos_taurus	PRJNA563691	Retinal_microvascular_endothelial_cell	Retinal	NA	NA	NA	2124736	2038526	0.959426	153266246	147867587
SRR10062493	SAMN12685259	Bos_taurus	PRJNA563691	Retinal_microvascular_endothelial_cell	Retinal	NA	NA	NA	3117996	2978294	0.955195	223715262	215049080
SRR10062494	SAMN12685258	Bos_taurus	PRJNA563691	Retinal_microvascular_endothelial_cell	Retinal	NA	NA	NA	2516640	2399140	0.953311	180328817	172940210
SRR10062495	SAMN12685257	Bos_taurus	PRJNA563691	Retinal_microvascular_endothelial_cell	Retinal	NA	NA	NA	1776529	1690891	0.951795	128562794	123072522
SRR10062496	SAMN12685256	Bos_taurus	PRJNA563691	Retinal_microvascular_endothelial_cell	Retinal	NA	NA	NA	2656099	2549365	0.959816	191856303	185219406
SRR10062497	SAMN12685255	Bos_taurus	PRJNA563691	Retinal_microvascular_endothelial_cell	Retinal	NA	NA	NA	2925506	2797324	0.956185	210935511	202979356
SRR10062498	SAMN12685254	Bos_taurus	PRJNA563691	Retinal_microvascular_endothelial_cell	Retinal	NA	NA	NA	2366645	2270379	0.959324	170423017	164456310
SRR10062499	SAMN12685253	Bos_taurus	PRJNA563691	Retinal_microvascular_endothelial_cell	Retinal	NA	NA	NA	3056167	2923897	0.95672	220817823	212471841
SRR10062500	SAMN12685252	Bos_taurus	PRJNA563691	Retinal_microvascular_endothelial_cell	Retinal	NA	NA	NA	1892777	1811355	0.956983	136852579	131746201
SRR10062501	SAMN12685251	Bos_taurus	PRJNA563691	Retinal_microvascular_endothelial_cell	Retinal	NA	NA	NA	2471193	2358011	0.954199	178518603	171413809
SRR10062502	SAMN12685250	Bos_taurus	PRJNA563691	Retinal_microvascular_endothelial_cell	Retinal	NA	NA	NA	2376738	2276564	0.957852	171414721	165199991
SRR10062503	SAMN12685249	Bos_taurus	PRJNA563691	Retinal_microvascular_endothelial_cell	Retinal	NA	NA	NA	2255157	2156599	0.956297	162860340	156699003
SRR10062504	SAMN12685248	Bos_taurus	PRJNA563691	Retinal_microvascular_endothelial_cell	Retinal	NA	NA	NA	2083579	1996015	0.957974	150259117	144766092
SRR10062505	SAMN12685247	Bos_taurus	PRJNA563691	Retinal_microvascular_endothelial_cell	Retinal	NA	NA	NA	2561494	2438898	0.952139	185111008	177341185
SRR10062506	SAMN12685246	Bos_taurus	PRJNA563691	Retinal_microvascular_endothelial_cell	Retinal	NA	NA	NA	2189991	2088391	0.953607	158567784	152247062
SRR10062507	SAMN12685245	Bos_taurus	PRJNA563691	Retinal_microvascular_endothelial_cell	Retinal	NA	NA	NA	2734839	2601833	0.951366	197694368	189326648
SRR10062508	SAMN12685244	Bos_taurus	PRJNA563691	Retinal_microvascular_endothelial_cell	Retinal	NA	NA	NA	1965991	1880453	0.956491	141832295	136488805
SRR10062509	SAMN12685243	Bos_taurus	PRJNA563691	Retinal_microvascular_endothelial_cell	Retinal	NA	NA	NA	1885261	1807911	0.958971	135654768	130849794
SRR10062510	SAMN12685242	Bos_taurus	PRJNA563691	Retinal_microvascular_endothelial_cell	Retinal	NA	NA	NA	1873102	1790582	0.955945	135036594	129903114
SRR10062511	SAMN12685241	Bos_taurus	PRJNA563691	Retinal_microvascular_endothelial_cell	Retinal	NA	NA	NA	2577962	2467120	0.957004	185799816	178901546
SRR10062512	SAMN12685240	Bos_taurus	PRJNA563691	Retinal_microvascular_endothelial_cell	Retinal	NA	NA	NA	2316546	2208108	0.95319	168159561	161238940
SRR10062513	SAMN12685239	Bos_taurus	PRJNA563691	Retinal_microvascular_endothelial_cell	Retinal	NA	NA	NA	2399982	2288912	0.95372	172951639	166134358
SRR10062514	SAMN12685238	Bos_taurus	PRJNA563691	Retinal_microvascular_endothelial_cell	Retinal	NA	NA	NA	4440834	4256182	0.95842	320667793	309245292
SRR10062515	SAMN12685237	Bos_taurus	PRJNA563691	Retinal_microvascular_endothelial_cell	Retinal	NA	NA	NA	2185702	2074860	0.949288	157455316	150494640
SRR10062516	SAMN12685236	Bos_taurus	PRJNA563691	Retinal_microvascular_endothelial_cell	Retinal	NA	NA	NA	1960679	1882261	0.960005	141332992	136431281
SRR10062517	SAMN12685235	Bos_taurus	PRJNA563691	Retinal_microvascular_endothelial_cell	Retinal	NA	NA	NA	3112866	2974308	0.955489	223912710	215224771
SRR10062518	SAMN12685231	Bos_taurus	PRJNA563691	Retinal_microvascular_endothelial_cell	Retinal	NA	NA	NA	2287269	2183727	0.954731	165356734	158820378
SRR10062519	SAMN12685293	Bos_taurus	PRJNA563691	Retinal_microvascular_endothelial_cell	Retinal	NA	NA	NA	2824036	2704012	0.957499	204065432	196647340
SRR10062520	SAMN12685292	Bos_taurus	PRJNA563691	Retinal_microvascular_endothelial_cell	Retinal	NA	NA	NA	3248226	3108542	0.956997	234980145	226191983
SRR10062521	SAMN12685290	Bos_taurus	PRJNA563691	Retinal_microvascular_endothelial_cell	Retinal	NA	NA	NA	2293003	2201263	0.959991	165462616	159743768
SRR10062522	SAMN12685234	Bos_taurus	PRJNA563691	Retinal_microvascular_endothelial_cell	Retinal	NA	NA	NA	3198605	3073193	0.960792	231399097	223616278
SRR10062523	SAMN12685233	Bos_taurus	PRJNA563691	Retinal_microvascular_endothelial_cell	Retinal	NA	NA	NA	1596771	1521975	0.953158	114998573	110291170
SRR10062524	SAMN12685232	Bos_taurus	PRJNA563691	Retinal_microvascular_endothelial_cell	Retinal	NA	NA	NA	1697905	1630547	0.960329	122581387	118362845
SRR10062525	SAMN12685289	Bos_taurus	PRJNA563691	Retinal_microvascular_endothelial_cell	Retinal	NA	NA	NA	2212246	2080852	0.940606	159176388	151062814
SRR10062526	SAMN12685287	Bos_taurus	PRJNA563691	Retinal_microvascular_endothelial_cell	Retinal	NA	NA	NA	2605606	2484318	0.953451	188309959	180727333
SRR10062527	SAMN12685286	Bos_taurus	PRJNA563691	Retinal_microvascular_endothelial_cell	Retinal	NA	NA	NA	1397960	1319696	0.944016	100996806	96038798
SRR10062528	SAMN12685284	Bos_taurus	PRJNA563691	Retinal_microvascular_endothelial_cell	Retinal	NA	NA	NA	2515680	2398956	0.953601	181305985	173955652
SRR10062529	SAMN12685283	Bos_taurus	PRJNA563691	Retinal_microvascular_endothelial_cell	Retinal	NA	NA	NA	2044791	1955495	0.95633	146862035	141326733
SRR10062530	SAMN12685282	Bos_taurus	PRJNA563691	Retinal_microvascular_endothelial_cell	Retinal	NA	NA	NA	2864189	2732063	0.95387	206177344	197921103
SRR10062531	SAMN12685281	Bos_taurus	PRJNA563691	Retinal_microvascular_endothelial_cell	Retinal	NA	NA	NA	2960727	2821449	0.952958	215597255	206715611
SRR10062532	SAMN12685279	Bos_taurus	PRJNA563691	Retinal_microvascular_endothelial_cell	Retinal	NA	NA	NA	2275614	2176046	0.956246	163592957	157414085
SRR10062533	SAMN12685278	Bos_taurus	PRJNA563691	Retinal_microvascular_endothelial_cell	Retinal	NA	NA	NA	1677880	1603296	0.955549	120769468	116103822
SRR10062534	SAMN12685277	Bos_taurus	PRJNA563691	Retinal_microvascular_endothelial_cell	Retinal	NA	NA	NA	1496198	1423794	0.951608	107582659	103010564
SRR10062535	SAMN12685275	Bos_taurus	PRJNA563691	Retinal_microvascular_endothelial_cell	Retinal	NA	NA	NA	1821451	1734821	0.952439	131188108	125728422
SRR10062536	SAMN12685274	Bos_taurus	PRJNA563691	Retinal_microvascular_endothelial_cell	Retinal	NA	NA	NA	1639153	1561645	0.952715	118149170	113243998
SRR10062537	SAMN12685273	Bos_taurus	PRJNA563691	Retinal_microvascular_endothelial_cell	Retinal	NA	NA	NA	1564168	1488224	0.951448	112844209	108028337
SRR10062538	SAMN12685271	Bos_taurus	PRJNA563691	Retinal_microvascular_endothelial_cell	Retinal	NA	NA	NA	1310045	1233689	0.941715	94658876	89768830
SRR10062539	SAMN12685270	Bos_taurus	PRJNA563691	Retinal_microvascular_endothelial_cell	Retinal	NA	NA	NA	1507184	1428364	0.947704	108423874	103431640
SRR10062540	SAMN12685269	Bos_taurus	PRJNA563691	Retinal_microvascular_endothelial_cell	Retinal	NA	NA	NA	1443242	1368182	0.947992	102935763	98324560
SRR10062541	SAMN12685267	Bos_taurus	PRJNA563691	Retinal_microvascular_endothelial_cell	Retinal	NA	NA	NA	7207165	7050507	0.978264	532847903	523054479
SRR10062542	SAMN12685266	Bos_taurus	PRJNA563691	Retinal_microvascular_endothelial_cell	Retinal	NA	NA	NA	12882605	12538569	0.973295	930717137	909764293
SRR10062543	SAMN12685264	Bos_taurus	PRJNA563691	Retinal_microvascular_endothelial_cell	Retinal	NA	NA	NA	9836554	9506016	0.966397	723937028	703703981
SRR10062544	SAMN12685263	Bos_taurus	PRJNA563691	Retinal_microvascular_endothelial_cell	Retinal	NA	NA	NA	9918816	9606664	0.968529	730909857	711422179
SRR10062545	SAMN12685333	Bos_taurus	PRJNA563691	Retinal_microvascular_endothelial_cell	Retinal	NA	NA	NA	10241866	9914428	0.968029	754583877	734467378
SRR10062546	SAMN12685332	Bos_taurus	PRJNA563691	Retinal_microvascular_endothelial_cell	Retinal	NA	NA	NA	10346579	10003767	0.966867	762308687	741028425
SRR10062547	SAMN12685331	Bos_taurus	PRJNA563691	Retinal_microvascular_endothelial_cell	Retinal	NA	NA	NA	8787614	8503852	0.967709	647275263	629867981
SRR10062548	SAMN12685330	Bos_taurus	PRJNA563691	Retinal_microvascular_endothelial_cell	Retinal	NA	NA	NA	10428187	10095803	0.968126	768489884	748128476
SRR10062549	SAMN12685329	Bos_taurus	PRJNA563691	Retinal_microvascular_endothelial_cell	Retinal	NA	NA	NA	9869655	9569663	0.969605	727807628	709463814
SRR10062550	SAMN12685328	Bos_taurus	PRJNA563691	Retinal_microvascular_endothelial_cell	Retinal	NA	NA	NA	8669232	8448456	0.974533	639389108	625536941
SRR10062551	SAMN12685327	Bos_taurus	PRJNA563691	Retinal_microvascular_endothelial_cell	Retinal	NA	NA	NA	11820598	11487694	0.971837	870703478	850183692
SRR10062552	SAMN12685326	Bos_taurus	PRJNA563691	Retinal_microvascular_endothelial_cell	Retinal	NA	NA	NA	11565051	11237587	0.971685	852176099	831759046
SRR10062553	SAMN12685325	Bos_taurus	PRJNA563691	Retinal_microvascular_endothelial_cell	Retinal	NA	NA	NA	8348300	8095872	0.969763	615446209	599791397
SRR10062554	SAMN12685324	Bos_taurus	PRJNA563691	Retinal_microvascular_endothelial_cell	Retinal	NA	NA	NA	8485732	8203714	0.966766	624655818	607013229
SRR10062555	SAMN12685323	Bos_taurus	PRJNA563691	Retinal_microvascular_endothelial_cell	Retinal	NA	NA	NA	14305471	13911377	0.972452	1053047253	1028643715
SRR10062556	SAMN12685322	Bos_taurus	PRJNA563691	Retinal_microvascular_endothelial_cell	Retinal	NA	NA	NA	9926413	9676807	0.974854	731835906	716512054
SRR10062557	SAMN12685321	Bos_taurus	PRJNA563691	Retinal_microvascular_endothelial_cell	Retinal	NA	NA	NA	13267402	12909812	0.973047	977348691	955237625
SRR10062558	SAMN12685320	Bos_taurus	PRJNA563691	Retinal_microvascular_endothelial_cell	Retinal	NA	NA	NA	11943305	11615683	0.972569	879650154	859495412
SRR10062559	SAMN12685319	Bos_taurus	PRJNA563691	Retinal_microvascular_endothelial_cell	Retinal	NA	NA	NA	9147426	8921856	0.975341	675648698	661662103
SRR10062560	SAMN12685318	Bos_taurus	PRJNA563691	Retinal_microvascular_endothelial_cell	Retinal	NA	NA	NA	7899240	7697114	0.974412	567197426	554902332
SRR10062561	SAMN12685317	Bos_taurus	PRJNA563691	Retinal_microvascular_endothelial_cell	Retinal	NA	NA	NA	15848216	15380526	0.970489	1165695186	1136838098
SRR10062562	SAMN12685316	Bos_taurus	PRJNA563691	Retinal_microvascular_endothelial_cell	Retinal	NA	NA	NA	11086106	10543712	0.951074	806922689	772914895
SRR10062563	SAMN12685315	Bos_taurus	PRJNA563691	Retinal_microvascular_endothelial_cell	Retinal	NA	NA	NA	9546246	9255136	0.969505	704177054	686281316
SRR10062564	SAMN12685314	Bos_taurus	PRJNA563691	Retinal_microvascular_endothelial_cell	Retinal	NA	NA	NA	13144315	12743431	0.969501	967945982	943101819
SRR10062565	SAMN12685313	Bos_taurus	PRJNA563691	Retinal_microvascular_endothelial_cell	Retinal	NA	NA	NA	3414784	2998210	0.878009	246910639	219956995
SRR10062566	SAMN12685312	Bos_taurus	PRJNA563691	Retinal_microvascular_endothelial_cell	Retinal	NA	NA	NA	8922939	8695283	0.974486	658970625	644841230
SRR10062567	SAMN12685311	Bos_taurus	PRJNA563691	Retinal_microvascular_endothelial_cell	Retinal	NA	NA	NA	4893395	4766257	0.974018	348202569	340548775
SRR10062568	SAMN12685310	Bos_taurus	PRJNA563691	Retinal_microvascular_endothelial_cell	Retinal	NA	NA	NA	17328961	16857725	0.972806	1265602457	1236901167
SRR10062569	SAMN12685309	Bos_taurus	PRJNA563691	Retinal_microvascular_endothelial_cell	Retinal	NA	NA	NA	16494586	16031160	0.971904	1214881188	1186195403
SRR10062570	SAMN12685338	Bos_taurus	PRJNA563691	Retinal_microvascular_endothelial_cell	Retinal	NA	NA	NA	10909759	10578935	0.969676	804999580	784615433
SRR10062571	SAMN12685337	Bos_taurus	PRJNA563691	Retinal_microvascular_endothelial_cell	Retinal	NA	NA	NA	13257979	12888521	0.972133	977140936	954306553
SRR10062572	SAMN12685336	Bos_taurus	PRJNA563691	Retinal_microvascular_endothelial_cell	Retinal	NA	NA	NA	15597129	15127639	0.969899	1146357361	1117569580
SRR10062573	SAMN12685335	Bos_taurus	PRJNA563691	Retinal_microvascular_endothelial_cell	Retinal	NA	NA	NA	12568058	12206526	0.971234	927150631	904944933
SRR10062574	SAMN12685334	Bos_taurus	PRJNA563691	Retinal_microvascular_endothelial_cell	Retinal	NA	NA	NA	10984144	10700634	0.974189	811305099	793758291
SRR10062575	SAMN12685262	Bos_taurus	PRJNA563691	Retinal_microvascular_endothelial_cell	Retinal	NA	NA	NA	19220533	18699415	0.972887	1414384287	1382600305
SRR10062576	SAMN12685261	Bos_taurus	PRJNA563691	Retinal_microvascular_endothelial_cell	Retinal	NA	NA	NA	15346335	14916899	0.972017	1131628878	1105157280
SRR10062577	SAMN12685308	Bos_taurus	PRJNA563691	Retinal_microvascular_endothelial_cell	Retinal	NA	NA	NA	17213212	16737258	0.972349	1268779639	1239464942
SRR10062578	SAMN12685307	Bos_taurus	PRJNA563691	Retinal_microvascular_endothelial_cell	Retinal	NA	NA	NA	3511964	3288312	0.936317	252649255	238681421
SRR10062579	SAMN12685306	Bos_taurus	PRJNA563691	Retinal_microvascular_endothelial_cell	Retinal	NA	NA	NA	12658899	12272245	0.969456	933189716	909344145
SRR10062580	SAMN12685300	Bos_taurus	PRJNA563691	Retinal_microvascular_endothelial_cell	Retinal	NA	NA	NA	9100191	8861845	0.973809	671348882	656507888
SRR10062582	SAMN12685305	Bos_taurus	PRJNA563691	Retinal_microvascular_endothelial_cell	Retinal	NA	NA	NA	14344085	13915453	0.970118	1056252709	1029827314
SRR10062583	SAMN12685304	Bos_taurus	PRJNA563691	Retinal_microvascular_endothelial_cell	Retinal	NA	NA	NA	12236625	11885529	0.971308	901741924	879912206
SRR10062584	SAMN12685303	Bos_taurus	PRJNA563691	Retinal_microvascular_endothelial_cell	Retinal	NA	NA	NA	17294695	16844675	0.973979	1270497850	1242752116
SRR10062585	SAMN12685302	Bos_taurus	PRJNA563691	Retinal_microvascular_endothelial_cell	Retinal	NA	NA	NA	10316801	10036145	0.972796	762425535	744997803
SRR10062587	SAMN12685298	Bos_taurus	PRJNA563691	Retinal_microvascular_endothelial_cell	Retinal	NA	NA	NA	6768428	6513652	0.962358	498816303	483203965
SRR10062588	SAMN12685297	Bos_taurus	PRJNA563691	Retinal_microvascular_endothelial_cell	Retinal	NA	NA	NA	7370182	7152218	0.970426	544647066	531070228
SRR10062590	SAMN12685295	Bos_taurus	PRJNA563691	Retinal_microvascular_endothelial_cell	Retinal	NA	NA	NA	14642586	14194896	0.969425	1078820025	1051367932
SRR10062591	SAMN12685294	Bos_taurus	PRJNA563691	Retinal_microvascular_endothelial_cell	Retinal	NA	NA	NA	11444372	11062630	0.966644	842658399	819032014
SRR10180944	SAMN12842405	Bos_taurus	PRJNA574149	Primary_foot_skin_fibroblast_cell	Skin	NA	NA	NA	68604934	58503370	0.852757	10036041043	8590466689
SRR10180945	SAMN12842404	Bos_taurus	PRJNA574149	Primary_foot_skin_fibroblast_cell	Skin	NA	NA	NA	54722137	48351593	0.883584	8030131974	7100503002
SRR10180946	SAMN12842403	Bos_taurus	PRJNA574149	Primary_foot_skin_fibroblast_cell	Skin	NA	NA	NA	65219828	55983942	0.858388	9666643506	8297042270
SRR10180947	SAMN12842402	Bos_taurus	PRJNA574149	Primary_foot_skin_fibroblast_cell	Skin	NA	NA	NA	68448680	61369008	0.89657	10012806883	8976390350
SRR10180948	SAMN12842401	Bos_taurus	PRJNA574149	Primary_foot_skin_fibroblast_cell	Skin	NA	NA	NA	62722191	55933737	0.89177	9217175265	8217806059
SRR10180949	SAMN12842400	Bos_taurus	PRJNA574149	Primary_foot_skin_fibroblast_cell	Skin	NA	NA	NA	46267006	39529156	0.85437	6849962927	5850219705
SRR10180950	SAMN12842399	Bos_taurus	PRJNA574149	Primary_foot_skin_fibroblast_cell	Skin	NA	NA	NA	61484431	55133511	0.896707	9021192124	8088982884
SRR10180951	SAMN12842398	Bos_taurus	PRJNA574149	Primary_foot_skin_fibroblast_cell	Skin	NA	NA	NA	69599792	60493024	0.869155	10188578690	8852545386
SRR10180952	SAMN12842397	Bos_taurus	PRJNA574149	Primary_foot_skin_fibroblast_cell	Skin	NA	NA	NA	99976179	87399311	0.874201	14808185706	12943927786
SRR10180953	SAMN12842396	Bos_taurus	PRJNA574149	Primary_foot_skin_fibroblast_cell	Skin	NA	NA	NA	64364933	50205893	0.780019	9420581107	7357380829
SRR10180954	SAMN12842395	Bos_taurus	PRJNA574149	Primary_foot_skin_fibroblast_cell	Skin	NA	NA	NA	43359177	36320021	0.837655	6413551226	5373056539
SRR10180955	SAMN12842394	Bos_taurus	PRJNA574149	Primary_foot_skin_fibroblast_cell	Skin	NA	NA	NA	43524699	37318235	0.857404	6416059867	5499625549
SRR10180956	SAMN12842393	Bos_taurus	PRJNA574149	Primary_foot_skin_fibroblast_cell	Skin	NA	NA	NA	77970371	68868413	0.883264	11394627596	10067570600
SRR10180957	SAMN12842392	Bos_taurus	PRJNA574149	Primary_foot_skin_fibroblast_cell	Skin	NA	NA	NA	48792745	39105313	0.801458	7157314296	5741059844
SRR10180958	SAMN12842391	Bos_taurus	PRJNA574149	Primary_foot_skin_fibroblast_cell	Skin	NA	NA	NA	82472861	70993023	0.860805	12201778136	10504315066
SRR10180959	SAMN12842390	Bos_taurus	PRJNA574149	Primary_foot_skin_fibroblast_cell	Skin	NA	NA	NA	64641728	55315812	0.855729	9552225135	8172151035
SRR10180960	SAMN12842389	Bos_taurus	PRJNA574149	Primary_foot_skin_fibroblast_cell	Skin	NA	NA	NA	56148895	50412321	0.897833	8237622282	7393430245
SRR10180961	SAMN12842388	Bos_taurus	PRJNA574149	Primary_foot_skin_fibroblast_cell	Skin	NA	NA	NA	73737918	59005552	0.800206	10913595252	8736313482
SRR10180962	SAMN12842387	Bos_taurus	PRJNA574149	Primary_foot_skin_fibroblast_cell	Skin	NA	NA	NA	68019420	60030156	0.882544	10025790148	8846717969
SRR10180963	SAMN12842386	Bos_taurus	PRJNA574149	Primary_foot_skin_fibroblast_cell	Skin	NA	NA	NA	77058728	66026068	0.856828	11389126819	9755900552
SRR1020300	SAMN02387956	Bos_taurus	PRJNA225601	Monocyte	White_cell	Holstein	NA	NA	4369900	4296018	0.983093	171105522	168175221
SRR1020301	SAMN02387961	Bos_taurus	PRJNA225601	Monocyte	White_cell	Holstein	NA	NA	2894779	2718223	0.939009	115997075	108930583
SRR1020302	SAMN02387957	Bos_taurus	PRJNA225601	Monocyte	White_cell	Holstein	NA	NA	1606367	1486448	0.925348	61826618	57179858
SRR1020303	SAMN02387959	Bos_taurus	PRJNA225601	Monocyte	White_cell	Holstein	NA	NA	1629688	1530569	0.939179	65826859	61964061
SRR1020309	SAMN02387966	Bos_taurus	PRJNA225601	Monocyte	White_cell	Holstein	NA	NA	1612826	1566991	0.971581	62619993	60821213
SRR1020311	SAMN02387965	Bos_taurus	PRJNA225601	Monocyte	White_cell	Holstein	NA	NA	1945429	1866091	0.959218	78210313	75024437
SRR1020317	SAMN02387970	Bos_taurus	PRJNA225601	Monocyte	White_cell	Holstein	NA	NA	2120921	2087116	0.984061	84307647	82944069
SRR1020319	SAMN02387977	Bos_taurus	PRJNA225601	Monocyte	White_cell	Holstein	NA	NA	3660160	3265166	0.892083	145854433	130114704
SRR1020320	SAMN02387973	Bos_taurus	PRJNA225601	Monocyte	White_cell	Holstein	NA	NA	1387343	1357358	0.978387	55742205	54531230
SRR1020323	SAMN02387924	Bos_taurus	PRJNA225601	Monocyte	White_cell	Holstein	NA	NA	2373111	2332149	0.982739	95131521	93489685
SRR1020324	SAMN02387927	Bos_taurus	PRJNA225601	Monocyte	White_cell	Holstein	NA	NA	3404221	3333615	0.979259	132809907	129980246
SRR1020326	SAMN02387929	Bos_taurus	PRJNA225601	Monocyte	White_cell	Holstein	NA	NA	3350534	3268966	0.975655	132340732	129046863
SRR1020329	SAMN02387930	Bos_taurus	PRJNA225601	Monocyte	White_cell	Holstein	NA	NA	2181035	2107039	0.966073	88388008	85442105
SRR1020330	SAMN02387936	Bos_taurus	PRJNA225601	Monocyte	White_cell	Holstein	NA	NA	2366334	2287218	0.966566	95849197	92778486
SRR1020331	SAMN02387932	Bos_taurus	PRJNA225601	Monocyte	White_cell	Holstein	NA	NA	1513420	1418971	0.937592	60282743	56550391
SRR1020332	SAMN02387934	Bos_taurus	PRJNA225601	Monocyte	White_cell	Holstein	NA	NA	2716268	2665642	0.981362	108459582	106411656
SRR1020333	SAMN02387933	Bos_taurus	PRJNA225601	Monocyte	White_cell	Holstein	NA	NA	1715834	1674637	0.97599	67931303	66304799
SRR1020337	SAMN02387944	Bos_taurus	PRJNA225601	Monocyte	White_cell	Holstein	NA	NA	3921747	3789369	0.966245	157019992	151866801
SRR1020338	SAMN02387939	Bos_taurus	PRJNA225601	Monocyte	White_cell	Holstein	NA	NA	1770636	1713475	0.967717	71847344	69555257
SRR1020339	SAMN02387949	Bos_taurus	PRJNA225601	Monocyte	White_cell	Holstein	NA	NA	7214383	7010016	0.971672	290420258	282381831
SRR1020344	SAMN02387941	Bos_taurus	PRJNA225601	Monocyte	White_cell	Holstein	NA	NA	1298641	1264322	0.973573	51441214	50090581
SRR1020345	SAMN02387948	Bos_taurus	PRJNA225601	Monocyte	White_cell	Holstein	NA	NA	3739293	3662141	0.979367	146647662	143602723
SRR1020350	SAMN02387978	Bos_taurus	PRJNA225601	Monocyte	White_cell	Holstein	NA	NA	2333051	2293207	0.982922	94806289	93223487
SRR1020352	SAMN02387979	Bos_taurus	PRJNA225601	Monocyte	White_cell	Holstein	NA	NA	2077151	2030240	0.977416	84644057	82734613
SRR1020362	SAMN02387984	Bos_taurus	PRJNA225601	Monocyte	White_cell	Holstein	NA	NA	1539857	1510492	0.98093	61987975	60831187
SRR1020363	SAMN02387985	Bos_taurus	PRJNA225601	Monocyte	White_cell	Holstein	NA	NA	2013437	1965742	0.976312	79115216	77282563
SRR1020367	SAMN02387997	Bos_taurus	PRJNA225601	Monocyte	White_cell	Holstein	NA	NA	4943059	4834031	0.977943	202131345	197755257
SRR1020368	SAMN02387986	Bos_taurus	PRJNA225601	Monocyte	White_cell	Holstein	NA	NA	4844890	4718056	0.973821	195841195	190876121
SRR1020369	SAMN02387994	Bos_taurus	PRJNA225601	Monocyte	White_cell	Holstein	NA	NA	2036122	1962574	0.963878	81311654	78439133
SRR1020373	SAMN02388003	Bos_taurus	PRJNA225601	Monocyte	White_cell	Holstein	NA	NA	5301331	5166009	0.974474	215616909	210327195
SRR1020374	SAMN02387990	Bos_taurus	PRJNA225601	Monocyte	White_cell	Holstein	NA	NA	2256634	2204803	0.977032	93956484	91854646
SRR1020377	SAMN02387993	Bos_taurus	PRJNA225601	Monocyte	White_cell	Holstein	NA	NA	1356217	1331723	0.981939	55643838	54646705
SRR1020378	SAMN02387998	Bos_taurus	PRJNA225601	Monocyte	White_cell	Holstein	NA	NA	1482239	1448715	0.977383	57291643	56017209
SRR1020381	SAMN02388005	Bos_taurus	PRJNA225601	Monocyte	White_cell	Holstein	NA	NA	1640984	1580023	0.962851	67328912	64838994
SRR1020382	SAMN02388006	Bos_taurus	PRJNA225601	Monocyte	White_cell	Holstein	NA	NA	1966085	1898897	0.965827	81304315	78576589
SRR1020387	SAMN02388012	Bos_taurus	PRJNA225601	Monocyte	White_cell	Holstein	NA	NA	1790652	1742588	0.973158	72852434	70962418
SRR1020389	SAMN02388016	Bos_taurus	PRJNA225601	Monocyte	White_cell	Holstein	NA	NA	1600084	1560431	0.975218	65933623	64359025
SRR1020391	SAMN02388014	Bos_taurus	PRJNA225601	Monocyte	White_cell	Holstein	NA	NA	4349195	4252468	0.97776	181030398	177109775
SRR1020395	SAMN02388021	Bos_taurus	PRJNA225601	Monocyte	White_cell	Holstein	NA	NA	5656202	5381606	0.951452	224896693	214127174
SRR1020396	SAMN02388023	Bos_taurus	PRJNA225601	Monocyte	White_cell	Holstein	NA	NA	10274674	10001527	0.973416	420056107	409290239
SRR1020398	SAMN02388024	Bos_taurus	PRJNA225601	Monocyte	White_cell	Holstein	NA	NA	4519468	4370575	0.967055	185689872	179768152
SRR1020399	SAMN02388102	Bos_taurus	PRJNA226086	Monocyte	White_cell	Holstein	NA	NA	19211126	18861352	0.981793	958107563	940717850
SRR1020400	SAMN02388095	Bos_taurus	PRJNA226086	Monocyte	White_cell	Holstein	NA	NA	18106463	17885473	0.987795	901976637	891083152
SRR1020401	SAMN02388108	Bos_taurus	PRJNA226086	Monocyte	White_cell	Holstein	NA	NA	24238057	23801680	0.981996	1207735751	1186047118
SRR1020402	SAMN02388090	Bos_taurus	PRJNA226086	Monocyte	White_cell	Holstein	NA	NA	17146379	16996919	0.991283	855188491	847767726
SRR1020403	SAMN02388093	Bos_taurus	PRJNA226086	Monocyte	White_cell	Holstein	NA	NA	16452206	16270147	0.988934	819638830	810614122
SRR1020404	SAMN02388112	Bos_taurus	PRJNA226086	Monocyte	White_cell	Holstein	NA	NA	16084664	15839517	0.984759	801819395	789651229
SRR1020405	SAMN02388100	Bos_taurus	PRJNA226086	Monocyte	White_cell	Holstein	NA	NA	16361862	15808843	0.966201	813860501	786669333
SRR1020406	SAMN02388098	Bos_taurus	PRJNA226086	Monocyte	White_cell	Holstein	NA	NA	11771339	11558333	0.981905	586870211	576280767
SRR1020407	SAMN02388111	Bos_taurus	PRJNA226086	Monocyte	White_cell	Holstein	NA	NA	14067758	13826901	0.982879	701549058	689647572
SRR1020408	SAMN02388103	Bos_taurus	PRJNA226086	Monocyte	White_cell	Holstein	NA	NA	34083361	33749527	0.990205	1699383436	1682810642
SRR1020409	SAMN02388096	Bos_taurus	PRJNA226086	Monocyte	White_cell	Holstein	NA	NA	21325252	21130253	0.990856	1078381770	1068616930
SRR1020410	SAMN02388120	Bos_taurus	PRJNA226086	Monocyte	White_cell	Holstein	NA	NA	36018413	35699354	0.991142	1794457528	1778647060
SRR1020411	SAMN02388107	Bos_taurus	PRJNA226086	Monocyte	White_cell	Holstein	NA	NA	65728813	65208776	0.992088	3273041122	3247296676
SRR1020412	SAMN02388106	Bos_taurus	PRJNA226086	Monocyte	White_cell	Holstein	NA	NA	62046853	61459573	0.990535	3091553787	3062445403
SRR1020413	SAMN02388119	Bos_taurus	PRJNA226086	Monocyte	White_cell	Holstein	NA	NA	69576171	68983779	0.991486	3519011394	3489334124
SRR1020414	SAMN02388110	Bos_taurus	PRJNA226086	Monocyte	White_cell	Holstein	NA	NA	52298861	51876874	0.991931	2635846420	2614920481
SRR1020415	SAMN02388117	Bos_taurus	PRJNA226086	Monocyte	White_cell	Holstein	NA	NA	40435180	36103408	0.892871	2045035287	1825598670
SRR1020416	SAMN02388122	Bos_taurus	PRJNA226086	Monocyte	White_cell	Holstein	NA	NA	52321633	51303406	0.980539	2635774110	2584976788
SRR1020417	SAMN02388113	Bos_taurus	PRJNA226086	Monocyte	White_cell	Holstein	NA	NA	41100792	39360689	0.957663	2076184669	1988734446
SRR1020418	SAMN02388116	Bos_taurus	PRJNA226086	Monocyte	White_cell	Holstein	NA	NA	53102008	51399312	0.967935	2622040533	2538050839
SRR1020419	SAMN02388115	Bos_taurus	PRJNA226086	Monocyte	White_cell	Holstein	NA	NA	41973650	41639125	0.99203	2122477332	2105823420
SRR1020420	SAMN02388114	Bos_taurus	PRJNA226086	Monocyte	White_cell	Holstein	NA	NA	56055706	55622638	0.992274	2834267298	2812690613
SRR1020421	SAMN02388121	Bos_taurus	PRJNA226086	Monocyte	White_cell	Holstein	NA	NA	35223684	34853788	0.989499	1784188303	1765633329
SRR1020422	SAMN02388118	Bos_taurus	PRJNA226086	Monocyte	White_cell	Holstein	NA	NA	62053136	61573334	0.992268	3064383202	3041105714
SRR1020423	SAMN02388127	Bos_taurus	PRJNA226086	Monocyte	White_cell	Holstein	NA	NA	47131000	46674905	0.990323	2384850584	2362001291
SRR1020424	SAMN02388125	Bos_taurus	PRJNA226086	Monocyte	White_cell	Holstein	NA	NA	31145589	30860321	0.990841	1551104373	1536990590
SRR1020425	SAMN02388124	Bos_taurus	PRJNA226086	Monocyte	White_cell	Holstein	NA	NA	16370890	15960415	0.974927	816100845	795766559
SRR1020426	SAMN02388128	Bos_taurus	PRJNA226086	Monocyte	White_cell	Holstein	NA	NA	49232721	48788276	0.990973	2454451734	2432402398
SRR1020427	SAMN02388068	Bos_taurus	PRJNA226086	Monocyte	White_cell	Holstein	NA	NA	25664390	25413412	0.990221	1279663534	1267204191
SRR1020428	SAMN02388073	Bos_taurus	PRJNA226086	Monocyte	White_cell	Holstein	NA	NA	9231238	9137406	0.989835	460438634	455778658
SRR1020429	SAMN02388123	Bos_taurus	PRJNA226086	Monocyte	White_cell	Holstein	NA	NA	16584322	16407742	0.989353	826171911	817432527
SRR1020430	SAMN02388126	Bos_taurus	PRJNA226086	Monocyte	White_cell	Holstein	NA	NA	11346646	11235800	0.990231	565973943	560467398
SRR1020431	SAMN02388072	Bos_taurus	PRJNA226086	Monocyte	White_cell	Holstein	NA	NA	17803553	17337436	0.973819	887893941	864707911
SRR1020432	SAMN02388075	Bos_taurus	PRJNA226086	Monocyte	White_cell	Holstein	NA	NA	41396325	40953735	0.989308	2062435942	2040525324
SRR1020433	SAMN02388074	Bos_taurus	PRJNA226086	Monocyte	White_cell	Holstein	NA	NA	39112513	38691597	0.989238	1946129712	1925331664
SRR1020434	SAMN02388076	Bos_taurus	PRJNA226086	Monocyte	White_cell	Holstein	NA	NA	15572343	15214281	0.977007	787375057	769412083
SRR1020435	SAMN02388084	Bos_taurus	PRJNA226086	Monocyte	White_cell	Holstein	NA	NA	21733182	20799819	0.957054	1082524974	1036145633
SRR1020436	SAMN02388079	Bos_taurus	PRJNA226086	Monocyte	White_cell	Holstein	NA	NA	3625184	3515670	0.969791	180632030	175271049
SRR1020437	SAMN02388078	Bos_taurus	PRJNA226086	Monocyte	White_cell	Holstein	NA	NA	36038304	35625912	0.988557	1794591442	1774146365
SRR1020438	SAMN02388094	Bos_taurus	PRJNA226086	Monocyte	White_cell	Holstein	NA	NA	103948689	102093962	0.982157	5171659051	5079866994
SRR1020439	SAMN02388071	Bos_taurus	PRJNA226086	Monocyte	White_cell	Holstein	NA	NA	44184808	43651716	0.987935	2227042395	2200454039
SRR1020440	SAMN02388070	Bos_taurus	PRJNA226086	Monocyte	White_cell	Holstein	NA	NA	40067540	38879391	0.970346	2028309758	1968180797
SRR1020441	SAMN02388081	Bos_taurus	PRJNA226086	Monocyte	White_cell	Holstein	NA	NA	52265862	51758307	0.990289	2635059147	2609896036
SRR1020442	SAMN02388077	Bos_taurus	PRJNA226086	Monocyte	White_cell	Holstein	NA	NA	49394627	48904469	0.990077	2502684335	2478031556
SRR1020443	SAMN02388097	Bos_taurus	PRJNA226086	Monocyte	White_cell	Holstein	NA	NA	35763432	35369225	0.988977	1811833248	1792006149
SRR1020444	SAMN02388082	Bos_taurus	PRJNA226086	Monocyte	White_cell	Holstein	NA	NA	69312576	68746127	0.991828	3502643607	3474536533
SRR1020445	SAMN02388080	Bos_taurus	PRJNA226086	Monocyte	White_cell	Holstein	NA	NA	62406449	61513036	0.985684	3156722774	3111840157
SRR1020446	SAMN02388099	Bos_taurus	PRJNA226086	Monocyte	White_cell	Holstein	NA	NA	49086195	48708064	0.992297	2473628563	2454828721
SRR1020447	SAMN02388083	Bos_taurus	PRJNA226086	Monocyte	White_cell	Holstein	NA	NA	33457323	33196416	0.992202	1685993818	1673022975
SRR1020448	SAMN02388085	Bos_taurus	PRJNA226086	Monocyte	White_cell	Holstein	NA	NA	43207184	42822252	0.991091	2184106352	2164915434
SRR1020449	SAMN02388101	Bos_taurus	PRJNA226086	Monocyte	White_cell	Holstein	NA	NA	45730047	45314611	0.990915	2304699874	2284032710
SRR1020450	SAMN02388088	Bos_taurus	PRJNA226086	Monocyte	White_cell	Holstein	NA	NA	40272225	39712989	0.986114	2037916106	2010007799
SRR1020451	SAMN02388086	Bos_taurus	PRJNA226086	Monocyte	White_cell	Holstein	NA	NA	49796344	49184221	0.987707	2526552062	2495637794
SRR1020452	SAMN02388104	Bos_taurus	PRJNA226086	Monocyte	White_cell	Holstein	NA	NA	23479376	23240295	0.989817	1191130900	1179071202
SRR1020453	SAMN02388087	Bos_taurus	PRJNA226086	Monocyte	White_cell	Holstein	NA	NA	18793997	18626581	0.991092	953865695	945419343
SRR1020454	SAMN02388091	Bos_taurus	PRJNA226086	Monocyte	White_cell	Holstein	NA	NA	29097901	28810342	0.990118	1477315173	1462804747
SRR1020455	SAMN02388105	Bos_taurus	PRJNA226086	Monocyte	White_cell	Holstein	NA	NA	27528972	27116321	0.98501	1387971434	1367333868
SRR1020456	SAMN02388089	Bos_taurus	PRJNA226086	Monocyte	White_cell	Holstein	NA	NA	32271654	32006693	0.99179	1631946483	1618688007
SRR1020457	SAMN02388092	Bos_taurus	PRJNA226086	Monocyte	White_cell	Holstein	NA	NA	6865581	6805255	0.991213	348418245	345378882
SRR1020458	SAMN02388109	Bos_taurus	PRJNA226086	Monocyte	White_cell	Holstein	NA	NA	37745227	37442108	0.991969	1908669304	1893510442
SRR1020459	SAMN02388033	Bos_taurus	PRJNA226086	Monocyte	White_cell	Holstein	NA	NA	69752697	69058552	0.990048	3526569453	3491784687
SRR1020460	SAMN02388030	Bos_taurus	PRJNA226086	Monocyte	White_cell	Holstein	NA	NA	37418530	37056982	0.990338	1893307792	1875173491
SRR1020461	SAMN02388029	Bos_taurus	PRJNA226086	Monocyte	White_cell	Holstein	NA	NA	13882079	13607914	0.98025	702550936	688725323
SRR1020462	SAMN02388034	Bos_taurus	PRJNA226086	Monocyte	White_cell	Holstein	NA	NA	26639627	26387183	0.990524	1351480568	1338753627
SRR1020463	SAMN02388032	Bos_taurus	PRJNA226086	Monocyte	White_cell	Holstein	NA	NA	23281128	23043835	0.989807	1182140102	1170172285
SRR1020464	SAMN02388037	Bos_taurus	PRJNA226086	Monocyte	White_cell	Holstein	NA	NA	52620456	51747045	0.983402	2616939893	2573946664
SRR1020465	SAMN02388040	Bos_taurus	PRJNA226086	Monocyte	White_cell	Holstein	NA	NA	25210604	24028930	0.953128	1250728141	1192113500
SRR1020466	SAMN02388031	Bos_taurus	PRJNA226086	Monocyte	White_cell	Holstein	NA	NA	55095799	54570279	0.990462	2732931193	2707085924
SRR1020467	SAMN02388035	Bos_taurus	PRJNA226086	Monocyte	White_cell	Holstein	NA	NA	50937788	50114362	0.983835	2532623352	2492140815
SRR1020468	SAMN02388041	Bos_taurus	PRJNA226086	Monocyte	White_cell	Holstein	NA	NA	43082699	42592955	0.988632	2135222621	2111136780
SRR1020470	SAMN02388039	Bos_taurus	PRJNA226086	Monocyte	White_cell	Holstein	NA	NA	63832535	62843270	0.984502	3166079973	3117464713
SRR1020471	SAMN02388046	Bos_taurus	PRJNA226086	Monocyte	White_cell	Holstein	NA	NA	43908390	43456098	0.989699	2173523229	2151353926
SRR1020472	SAMN02388038	Bos_taurus	PRJNA226086	Monocyte	White_cell	Holstein	NA	NA	40843076	40425453	0.989775	2023686713	2003165292
SRR1020473	SAMN02388042	Bos_taurus	PRJNA226086	Monocyte	White_cell	Holstein	NA	NA	23891408	23526428	0.984723	1190207629	1172088024
SRR1020474	SAMN02388047	Bos_taurus	PRJNA226086	Monocyte	White_cell	Holstein	NA	NA	23590028	23360452	0.990268	1195233940	1183732066
SRR1020475	SAMN02388043	Bos_taurus	PRJNA226086	Monocyte	White_cell	Holstein	NA	NA	34786203	34327527	0.986814	1759492080	1736758723
SRR1020476	SAMN02388044	Bos_taurus	PRJNA226086	Monocyte	White_cell	Holstein	NA	NA	43436451	42917950	0.988063	2198149301	2172096090
SRR1020477	SAMN02388054	Bos_taurus	PRJNA226086	Monocyte	White_cell	Holstein	NA	NA	19840945	19607873	0.988253	1007359298	995645713
SRR1020478	SAMN02388045	Bos_taurus	PRJNA226086	Monocyte	White_cell	Holstein	NA	NA	19441951	19043371	0.979499	985243206	965119313
SRR1020479	SAMN02388048	Bos_taurus	PRJNA226086	Monocyte	White_cell	Holstein	NA	NA	18636134	18470054	0.991088	944489533	936139786
SRR1020480	SAMN02388050	Bos_taurus	PRJNA226086	Monocyte	White_cell	Holstein	NA	NA	37465919	37126524	0.990941	1888724167	1871845749
SRR1020481	SAMN02388049	Bos_taurus	PRJNA226086	Monocyte	White_cell	Holstein	NA	NA	34868887	34513153	0.989798	1764092273	1746228301
SRR1020482	SAMN02388056	Bos_taurus	PRJNA226086	Monocyte	White_cell	Holstein	NA	NA	19638517	19434249	0.989599	993107445	982859016
SRR1020483	SAMN02388051	Bos_taurus	PRJNA226086	Monocyte	White_cell	Holstein	NA	NA	27863382	27589829	0.990182	1409306509	1395585170
SRR1020484	SAMN02388053	Bos_taurus	PRJNA226086	Monocyte	White_cell	Holstein	NA	NA	17212822	16954242	0.984977	870782548	857872777
SRR1020485	SAMN02388055	Bos_taurus	PRJNA226086	Monocyte	White_cell	Holstein	NA	NA	39694321	39160674	0.986556	1999518781	1973138596
SRR1020486	SAMN02388061	Bos_taurus	PRJNA226086	Monocyte	White_cell	Holstein	NA	NA	18811694	18614631	0.989524	953128823	943238487
SRR1020487	SAMN02388057	Bos_taurus	PRJNA226086	Monocyte	White_cell	Holstein	NA	NA	13114526	12997686	0.991091	665547094	659654484
SRR1020488	SAMN02388059	Bos_taurus	PRJNA226086	Monocyte	White_cell	Holstein	NA	NA	27103441	26864542	0.991186	1371751897	1359770479
SRR1020489	SAMN02388060	Bos_taurus	PRJNA226086	Monocyte	White_cell	Holstein	NA	NA	52625632	51963118	0.987411	2611730052	2579056127
SRR1020490	SAMN02388058	Bos_taurus	PRJNA226086	Monocyte	White_cell	Holstein	NA	NA	33074594	32079581	0.969916	1638987653	1589752817
SRR1020491	SAMN02388063	Bos_taurus	PRJNA226086	Monocyte	White_cell	Holstein	NA	NA	40870479	40272964	0.98538	2023879512	1994469922
SRR1020492	SAMN02388064	Bos_taurus	PRJNA226086	Monocyte	White_cell	Holstein	NA	NA	44759762	44265166	0.98895	2215771100	2191511452
SRR1020493	SAMN02388069	Bos_taurus	PRJNA226086	Monocyte	White_cell	Holstein	NA	NA	15087203	14775813	0.979361	751509588	736137204
SRR1020494	SAMN02388052	Bos_taurus	PRJNA226086	Monocyte	White_cell	Holstein	NA	NA	25411176	25223349	0.992608	1265890203	1256593878
SRR1020495	SAMN02388067	Bos_taurus	PRJNA226086	Monocyte	White_cell	Holstein	NA	NA	55941555	55300304	0.988537	2771914564	2740410793
SRR1020496	SAMN02388066	Bos_taurus	PRJNA226086	Monocyte	White_cell	Holstein	NA	NA	45712644	45305005	0.991083	2265591772	2245553313
SRR1020497	SAMN02388062	Bos_taurus	PRJNA226086	Monocyte	White_cell	Holstein	NA	NA	45714044	45242799	0.989691	2264753350	2241650262
SRR1020498	SAMN02388065	Bos_taurus	PRJNA226086	Monocyte	White_cell	Holstein	NA	NA	52948240	52293622	0.987637	2626645977	2594391315
SRR10351294	SAMN13133578	Bos_taurus	PRJNA579776	Whole_blood	Whole_blood	Angus	female	18m	23149308	21600820	0.933109	2295915887	2142559121
SRR10351295	SAMN13133577	Bos_taurus	PRJNA579776	Whole_blood	Whole_blood	Angus	male	18m	23177014	21948816	0.947008	2299521533	2177964833
SRR10351296	SAMN13133576	Bos_taurus	PRJNA579776	Whole_blood	Whole_blood	Angus	female	18m	23159011	22306151	0.963174	2298345530	2214024001
SRR10351297	SAMN13133575	Bos_taurus	PRJNA579776	Whole_blood	Whole_blood	Angus	male	18m	23266832	22106474	0.950128	2309416957	2194495585
SRR10351298	SAMN13133574	Bos_taurus	PRJNA579776	Whole_blood	Whole_blood	Angus	female	18m	22847188	21592820	0.945097	2262580344	2138648249
SRR10351299	SAMN13133573	Bos_taurus	PRJNA579776	Whole_blood	Whole_blood	Angus	male	18m	23148877	22302965	0.963458	2296485038	2212925531
SRR10351300	SAMN13133572	Bos_taurus	PRJNA579776	Whole_blood	Whole_blood	Angus	male	18m	21509317	20193439	0.938823	2127474570	1997587374
SRR10351301	SAMN13133571	Bos_taurus	PRJNA579776	Whole_blood	Whole_blood	Angus	female	18m	22155805	20914147	0.943958	2196701340	2073842514
SRR10351302	SAMN13133570	Bos_taurus	PRJNA579776	Whole_blood	Whole_blood	Angus	male	18m	23187691	21983877	0.948084	2299936506	2180806335
SRR10351303	SAMN13133569	Bos_taurus	PRJNA579776	Whole_blood	Whole_blood	Angus	female	18m	23247506	20434662	0.879004	2306695028	2027658611
SRR10351304	SAMN13133488	Bos_taurus	PRJNA579776	Liver	Liver	Angus	female	18m	22736694	22135544	0.97356	2257071719	2197653253
SRR10351305	SAMN13133568	Bos_taurus	PRJNA579776	Whole_blood	Whole_blood	Angus	female	18m	23192893	21631065	0.932659	2300101167	2145430108
SRR10351306	SAMN13133567	Bos_taurus	PRJNA579776	Whole_blood	Whole_blood	Angus	female	18m	22855570	21423870	0.937359	2263748844	2122173547
SRR10351307	SAMN13133566	Bos_taurus	PRJNA579776	Whole_blood	Whole_blood	Angus	female	18m	23185616	21130018	0.911342	2299738521	2096011991
SRR10351308	SAMN13133565	Bos_taurus	PRJNA579776	Whole_blood	Whole_blood	Angus	male	18m	22942125	21921017	0.955492	2274207340	2173308497
SRR10351309	SAMN13133564	Bos_taurus	PRJNA579776	Whole_blood	Whole_blood	Angus	male	18m	23046549	21900245	0.950261	2284371089	2171041030
SRR10351310	SAMN13133563	Bos_taurus	PRJNA579776	Whole_blood	Whole_blood	Angus	male	18m	23082214	21886074	0.948179	2288429449	2170083761
SRR10351311	SAMN13133562	Bos_taurus	PRJNA579776	Whole_blood	Whole_blood	Angus	male	18m	23071134	21891326	0.948862	2287119960	2170462783
SRR10351312	SAMN13133561	Bos_taurus	PRJNA579776	Whole_blood	Whole_blood	Angus	male	18m	23154711	20843081	0.900166	2295598496	2066533817
SRR10351313	SAMN13133560	Bos_taurus	PRJNA579776	Whole_blood	Whole_blood	Angus	female	18m	22722821	21485853	0.945563	2252225049	2129883557
SRR10351314	SAMN13133559	Bos_taurus	PRJNA579776	Whole_blood	Whole_blood	Angus	male	18m	22958698	21866198	0.952415	2275100114	2167100868
SRR10351315	SAMN13133487	Bos_taurus	PRJNA579776	Liver	Liver	Angus	male	18m	22616944	21999696	0.972709	2243808152	2182819178
SRR10351316	SAMN13133558	Bos_taurus	PRJNA579776	Whole_blood	Whole_blood	Angus	male	18m	22856577	21836935	0.95539	2264810215	2164096773
SRR10351317	SAMN13133557	Bos_taurus	PRJNA579776	Whole_blood	Whole_blood	Angus	male	18m	22188886	21128686	0.952219	2190045968	2085789102
SRR10351318	SAMN13133556	Bos_taurus	PRJNA579776	Whole_blood	Whole_blood	Angus	female	18m	22662386	21080636	0.930204	2243076661	2086857016
SRR10351319	SAMN13133555	Bos_taurus	PRJNA579776	Whole_blood	Whole_blood	Angus	female	18m	22891898	21235186	0.927629	2270520188	2106635373
SRR10351320	SAMN13133554	Bos_taurus	PRJNA579776	Whole_blood	Whole_blood	Angus	male	18m	22688270	20929224	0.922469	2248161195	2074143973
SRR10351321	SAMN13133553	Bos_taurus	PRJNA579776	Whole_blood	Whole_blood	Angus	male	18m	22053464	19301716	0.875224	2189501024	1916407408
SRR10351322	SAMN13133552	Bos_taurus	PRJNA579776	Whole_blood	Whole_blood	Angus	female	18m	21451869	17905283	0.834672	2131688766	1779278270
SRR10351323	SAMN13133551	Bos_taurus	PRJNA579776	Whole_blood	Whole_blood	Angus	female	18m	23361481	19214555	0.822489	2319539841	1907811027
SRR10351324	SAMN13133550	Bos_taurus	PRJNA579776	Whole_blood	Whole_blood	Angus	male	18m	23151667	21219291	0.916534	2296655951	2105125157
SRR10351325	SAMN13133549	Bos_taurus	PRJNA579776	Whole_blood	Whole_blood	Angus	female	18m	23250551	21351957	0.918342	2307368156	2119177185
SRR10351326	SAMN13133486	Bos_taurus	PRJNA579776	Liver	Liver	Angus	female	18m	22799024	22229156	0.975005	2262743771	2206465505
SRR10351327	SAMN13133548	Bos_taurus	PRJNA579776	Whole_blood	Whole_blood	Angus	female	18m	22740050	20715568	0.910973	2255613399	2055275536
SRR10351329	SAMN13133546	Bos_taurus	PRJNA579776	Whole_blood	Whole_blood	Angus	male	18m	22595712	21283248	0.941915	2238543741	2108788104
SRR10351331	SAMN13133544	Bos_taurus	PRJNA579776	Whole_blood	Whole_blood	Angus	male	18m	22842065	21007389	0.91968	2263515345	2082070541
SRR10351332	SAMN13133543	Bos_taurus	PRJNA579776	Whole_blood	Whole_blood	Angus	female	18m	22699798	16973600	0.747742	2251130022	1683191708
SRR10351333	SAMN13133542	Bos_taurus	PRJNA579776	Whole_blood	Whole_blood	Angus	male	18m	21881365	20492411	0.936523	2165012617	2027804880
SRR10351335	SAMN13133540	Bos_taurus	PRJNA579776	Whole_blood	Whole_blood	Angus	female	18m	23086163	22414043	0.970886	2290969806	2224601725
SRR10351336	SAMN13133539	Bos_taurus	PRJNA579776	Whole_blood	Whole_blood	Angus	male	18m	21287707	20605617	0.967959	2113653947	2046164967
SRR10351337	SAMN13133485	Bos_taurus	PRJNA579776	Liver	Liver	Angus	female	18m	22750376	22195442	0.975608	2257871031	2203069641
SRR10351338	SAMN13133538	Bos_taurus	PRJNA579776	Whole_blood	Whole_blood	Angus	female	18m	23341606	22742558	0.974336	2318288419	2259033782
SRR10351339	SAMN13133537	Bos_taurus	PRJNA579776	Whole_blood	Whole_blood	Angus	female	18m	23188166	22614162	0.975246	2302389770	2245802395
SRR10351341	SAMN13133535	Bos_taurus	PRJNA579776	Whole_blood	Whole_blood	Angus	female	18m	22795679	22246293	0.9759	2255788113	2201987148
SRR10351342	SAMN13133534	Bos_taurus	PRJNA579776	Whole_blood	Whole_blood	Angus	male	18m	23095699	22283047	0.964814	2290813672	2210789161
SRR10351343	SAMN13133533	Bos_taurus	PRJNA579776	Whole_blood	Whole_blood	Angus	female	18m	23265634	22308260	0.95885	2308280468	2213809155
SRR10351344	SAMN13133532	Bos_taurus	PRJNA579776	Whole_blood	Whole_blood	Angus	male	18m	23327479	22566145	0.967363	2315201641	2240063159
SRR10351345	SAMN13133531	Bos_taurus	PRJNA579776	Whole_blood	Whole_blood	Angus	female	18m	21395081	20866569	0.975297	2124783192	2072504328
SRR10351346	SAMN13133530	Bos_taurus	PRJNA579776	Liver	Liver	Angus	male	18m	23306799	22887225	0.981998	2313234925	2272272720
SRR10351347	SAMN13133529	Bos_taurus	PRJNA579776	Liver	Liver	Angus	female	18m	22858336	22473134	0.983148	2269499947	2231795523
SRR10351348	SAMN13133484	Bos_taurus	PRJNA579776	Liver	Liver	Angus	female	18m	22715654	22091742	0.972534	2254803264	2193114003
SRR10351349	SAMN13133528	Bos_taurus	PRJNA579776	Liver	Liver	Angus	male	18m	23152119	22790321	0.984373	2297673650	2262273861
SRR10351350	SAMN13133527	Bos_taurus	PRJNA579776	Liver	Liver	Angus	female	18m	22990431	22626519	0.984171	2280049353	2244492011
SRR10351351	SAMN13133526	Bos_taurus	PRJNA579776	Liver	Liver	Angus	female	18m	22891927	22453717	0.980857	2262326948	2219827343
SRR10351352	SAMN13133525	Bos_taurus	PRJNA579776	Liver	Liver	Angus	male	18m	21672209	21216549	0.978975	2143454558	2098784591
SRR10351353	SAMN13133524	Bos_taurus	PRJNA579776	Liver	Liver	Angus	female	18m	21730993	21065181	0.969361	2149635136	2084215776
SRR10351354	SAMN13133523	Bos_taurus	PRJNA579776	Liver	Liver	Angus	male	18m	21758408	21193086	0.974018	2151980529	2096516913
SRR10351355	SAMN13133522	Bos_taurus	PRJNA579776	Liver	Liver	Angus	female	18m	21468154	20970002	0.976796	2121760413	2072941613
SRR10351356	SAMN13133521	Bos_taurus	PRJNA579776	Liver	Liver	Angus	male	18m	21530380	20940972	0.972624	2129134284	2071308314
SRR10351357	SAMN13133520	Bos_taurus	PRJNA579776	Liver	Liver	Angus	male	18m	21843931	21270265	0.973738	2160965938	2104681847
SRR10351358	SAMN13133519	Bos_taurus	PRJNA579776	Liver	Liver	Angus	female	18m	22438319	21753217	0.969467	2190599380	2124293114
SRR10351359	SAMN13133483	Bos_taurus	PRJNA579776	Liver	Liver	Angus	female	18m	22771773	22158601	0.973073	2259585104	2198941734
SRR10351360	SAMN13133518	Bos_taurus	PRJNA579776	Liver	Liver	Angus	male	18m	21535678	20931540	0.971947	2128147912	2068950755
SRR10351361	SAMN13133517	Bos_taurus	PRJNA579776	Liver	Liver	Angus	female	18m	22856183	22295575	0.975472	2235062376	2180959867
SRR10351362	SAMN13133516	Bos_taurus	PRJNA579776	Liver	Liver	Angus	female	18m	22823853	22191173	0.97228	2258197601	2196139699
SRR10351363	SAMN13133515	Bos_taurus	PRJNA579776	Liver	Liver	Angus	female	18m	21852475	21316875	0.97549	2161572322	2109039404
SRR10351364	SAMN13133514	Bos_taurus	PRJNA579776	Liver	Liver	Angus	female	18m	22646262	22016090	0.972173	2244497371	2182491955
SRR10351365	SAMN13133513	Bos_taurus	PRJNA579776	Liver	Liver	Angus	male	18m	22709996	21929100	0.965614	2250871630	2173790989
SRR10351366	SAMN13133512	Bos_taurus	PRJNA579776	Liver	Liver	Angus	male	18m	22404685	21789411	0.972538	2218233151	2157661624
SRR10351367	SAMN13133511	Bos_taurus	PRJNA579776	Liver	Liver	Angus	male	18m	22740499	22161149	0.974523	2253933637	2196842726
SRR10351368	SAMN13133510	Bos_taurus	PRJNA579776	Liver	Liver	Angus	male	18m	20755024	20217020	0.974078	2056079831	2003131390
SRR10351369	SAMN13133509	Bos_taurus	PRJNA579776	Liver	Liver	Angus	male	18m	22613637	22122421	0.978278	2240468041	2192199226
SRR10351370	SAMN13133482	Bos_taurus	PRJNA579776	Liver	Liver	Angus	male	18m	22264581	21832415	0.98059	2209180438	2166575576
SRR10351371	SAMN13133508	Bos_taurus	PRJNA579776	Liver	Liver	Angus	female	18m	22720423	22075913	0.971633	2251710291	2188225760
SRR10351372	SAMN13133507	Bos_taurus	PRJNA579776	Liver	Liver	Angus	male	18m	22526092	21921136	0.973144	2231452033	2171869092
SRR10351373	SAMN13133506	Bos_taurus	PRJNA579776	Liver	Liver	Angus	male	18m	22961921	22302711	0.971291	2277881630	2212944832
SRR10351374	SAMN13133505	Bos_taurus	PRJNA579776	Liver	Liver	Angus	male	18m	24217149	23535603	0.971857	2402160665	2335014882
SRR10351375	SAMN13133504	Bos_taurus	PRJNA579776	Liver	Liver	Angus	female	18m	22634891	21851829	0.965405	2243369214	2166143240
SRR10351376	SAMN13133503	Bos_taurus	PRJNA579776	Liver	Liver	Angus	female	18m	23092541	22494347	0.974096	2291438136	2232478131
SRR10351377	SAMN13133502	Bos_taurus	PRJNA579776	Liver	Liver	Angus	male	18m	22834039	22188231	0.971717	2259076528	2195695538
SRR10351378	SAMN13133501	Bos_taurus	PRJNA579776	Liver	Liver	Angus	male	18m	21271923	20626881	0.969676	2113579694	2049751464
SRR10351379	SAMN13133500	Bos_taurus	PRJNA579776	Liver	Liver	Angus	female	18m	23255560	22501664	0.967582	2309035234	2234534868
SRR10351380	SAMN13133499	Bos_taurus	PRJNA579776	Liver	Liver	Angus	female	18m	23190705	22633259	0.975963	2301719899	2246606268
SRR10351381	SAMN13133481	Bos_taurus	PRJNA579776	Liver	Liver	Angus	female	18m	22689013	22154687	0.97645	2250976177	2198219692
SRR10351382	SAMN13133498	Bos_taurus	PRJNA579776	Liver	Liver	Angus	male	18m	23020030	22450736	0.97527	2284551186	2228230000
SRR10351383	SAMN13133497	Bos_taurus	PRJNA579776	Liver	Liver	Angus	female	18m	23323721	22516539	0.965392	2316206525	2236233419
SRR10351384	SAMN13133496	Bos_taurus	PRJNA579776	Liver	Liver	Angus	female	18m	22301289	21852505	0.979876	2208500204	2164397321
SRR10351385	SAMN13133495	Bos_taurus	PRJNA579776	Liver	Liver	Angus	female	18m	22670652	22022472	0.971409	2249808185	2185749128
SRR10351386	SAMN13133494	Bos_taurus	PRJNA579776	Liver	Liver	Angus	male	18m	22343038	21634986	0.96831	2212996598	2143143120
SRR10351387	SAMN13133493	Bos_taurus	PRJNA579776	Liver	Liver	Angus	female	18m	21448635	20623723	0.96154	2128293651	2046644423
SRR10351388	SAMN13133492	Bos_taurus	PRJNA579776	Liver	Liver	Angus	male	18m	22739325	22107239	0.972203	2257195951	2194721612
SRR10351389	SAMN13133491	Bos_taurus	PRJNA579776	Liver	Liver	Angus	female	18m	22608977	21957303	0.971176	2243899140	2179449095
SRR10351390	SAMN13133490	Bos_taurus	PRJNA579776	Liver	Liver	Angus	male	18m	22642212	22017144	0.972394	2246783387	2184991566
SRR10351391	SAMN13133582	Bos_taurus	PRJNA579776	Whole_blood	Whole_blood	Angus	male	18m	22447722	21833818	0.972652	2224791956	2164598980
SRR10351392	SAMN13133581	Bos_taurus	PRJNA579776	Whole_blood	Whole_blood	Angus	female	18m	18742560	18318714	0.977386	1835850463	1794893253
SRR10351393	SAMN13133580	Bos_taurus	PRJNA579776	Whole_blood	Whole_blood	Angus	male	18m	23307933	22208395	0.952826	2314229864	2205269958
SRR10351394	SAMN13133579	Bos_taurus	PRJNA579776	Whole_blood	Whole_blood	Angus	female	18m	23317375	22254179	0.954403	2314439815	2209150382
SRR10351395	SAMN13133489	Bos_taurus	PRJNA579776	Liver	Liver	Angus	male	18m	22527819	21875167	0.971029	2234320186	2169843639
SRR10351396	SAMN13133480	Bos_taurus	PRJNA579776	Liver	Liver	Angus	male	18m	23334137	22312953	0.956236	2316616857	2215536789
SRR10351397	SAMN13133479	Bos_taurus	PRJNA579776	Liver	Liver	Angus	female	18m	23004961	22375281	0.972629	2275222686	2213267130
SRR10677643	SAMN13549405	Bos_taurus	PRJNA595353	Uterine_endometrial_tissue	Uterine	NA	NA	NA	14734700	14646125	0.993989	1446480043	1437966276
SRR10677644	SAMN13549404	Bos_taurus	PRJNA595353	Uterine_endometrial_tissue	Uterine	NA	NA	NA	18199681	18117258	0.995471	1785664713	1777737460
SRR10677645	SAMN13549402	Bos_taurus	PRJNA595353	Uterine_endometrial_tissue	Uterine	NA	NA	NA	19447487	19369948	0.996013	1903650027	1896268454
SRR10677646	SAMN13549401	Bos_taurus	PRJNA595353	Uterine_endometrial_tissue	Uterine	NA	NA	NA	16495849	16404294	0.99445	1618452047	1609702267
SRR10677647	SAMN13549399	Bos_taurus	PRJNA595353	Uterine_endometrial_tissue	Uterine	NA	NA	NA	18954038	18889465	0.996593	1853743056	1847598725
SRR10677648	SAMN13549398	Bos_taurus	PRJNA595353	Uterine_endometrial_tissue	Uterine	NA	NA	NA	17511740	17399539	0.993593	1716133723	1705410390
SRR10677649	SAMN13549397	Bos_taurus	PRJNA595353	Uterine_endometrial_tissue	Uterine	NA	NA	NA	16758879	16721634	0.997778	1639628898	1636131478
SRR10677650	SAMN13549396	Bos_taurus	PRJNA595353	Uterine_endometrial_tissue	Uterine	NA	NA	NA	15571980	15466479	0.993225	1527164881	1517008254
SRR10677651	SAMN13549395	Bos_taurus	PRJNA595353	Uterine_endometrial_tissue	Uterine	NA	NA	NA	16891411	16825123	0.996076	1653737267	1647416817
SRR10677652	SAMN13549394	Bos_taurus	PRJNA595353	Uterine_endometrial_tissue	Uterine	NA	NA	NA	17494831	17383267	0.993623	1712496282	1701775142
SRR10677653	SAMN13549393	Bos_taurus	PRJNA595353	Uterine_endometrial_tissue	Uterine	NA	NA	NA	18577763	18482792	0.994888	1818972985	1809926831
SRR10677654	SAMN13549392	Bos_taurus	PRJNA595353	Uterine_endometrial_tissue	Uterine	NA	NA	NA	15555973	15480122	0.995124	1524211682	1516970542
SRR10677655	SAMN13549391	Bos_taurus	PRJNA595353	Uterine_endometrial_tissue	Uterine	NA	NA	NA	18929866	18872485	0.996969	1852929803	1847486633
SRR10677656	SAMN13549390	Bos_taurus	PRJNA595353	Uterine_endometrial_tissue	Uterine	NA	NA	NA	18910979	18696316	0.988649	1854575789	1833786796
SRR10677657	SAMN13549389	Bos_taurus	PRJNA595353	Uterine_endometrial_tissue	Uterine	NA	NA	NA	16415070	16324474	0.994481	1610908809	1602175108
SRR10677658	SAMN13549388	Bos_taurus	PRJNA595353	Uterine_endometrial_tissue	Uterine	NA	NA	NA	17355450	17250590	0.993958	1703672418	1693585456
SRR10677659	SAMN13549387	Bos_taurus	PRJNA595353	Uterine_endometrial_tissue	Uterine	NA	NA	NA	17284051	17185219	0.994282	1693510858	1684074214
SRR10677660	SAMN13549386	Bos_taurus	PRJNA595353	Uterine_endometrial_tissue	Uterine	NA	NA	NA	17555783	17417640	0.992131	1720754433	1707454174
SRR10677661	SAMN13549385	Bos_taurus	PRJNA595353	Uterine_endometrial_tissue	Uterine	NA	NA	NA	15244753	15186166	0.996157	1496728054	1491132458
SRR10677662	SAMN13549384	Bos_taurus	PRJNA595353	Uterine_endometrial_tissue	Uterine	NA	NA	NA	17880234	17793056	0.995124	1751648664	1743328578
SRR10677663	SAMN13549383	Bos_taurus	PRJNA595353	Uterine_endometrial_tissue	Uterine	NA	NA	NA	17084642	17006497	0.995426	1672097785	1664631061
SRR10677664	SAMN13549382	Bos_taurus	PRJNA595353	Uterine_endometrial_tissue	Uterine	NA	NA	NA	19258130	19176721	0.995773	1890025588	1882219826
SRR10677665	SAMN13549381	Bos_taurus	PRJNA595353	Uterine_endometrial_tissue	Uterine	NA	NA	NA	17206069	17124648	0.995268	1686493336	1678699403
SRR10677666	SAMN13549380	Bos_taurus	PRJNA595353	Uterine_endometrial_tissue	Uterine	NA	NA	NA	18052548	17943502	0.99396	1768890729	1758423537
SRR10677667	SAMN13549379	Bos_taurus	PRJNA595353	Uterine_endometrial_tissue	Uterine	NA	NA	NA	17917869	17819017	0.994483	1754481052	1745061234
SRR10677668	SAMN13549378	Bos_taurus	PRJNA595353	Uterine_endometrial_tissue	Uterine	NA	NA	NA	17782350	17703597	0.995571	1740294310	1732770146
SRR10677669	SAMN13549377	Bos_taurus	PRJNA595353	Uterine_endometrial_tissue	Uterine	NA	NA	NA	17401713	17303414	0.994351	1703092515	1693700202
SRR10677670	SAMN13549376	Bos_taurus	PRJNA595353	Uterine_endometrial_tissue	Uterine	NA	NA	NA	17146649	17058010	0.994831	1679543463	1671077710
SRR10677671	SAMN13549373	Bos_taurus	PRJNA595353	Uterine_endometrial_tissue	Uterine	NA	NA	NA	16821653	16777643	0.997384	1651824253	1647642563
SRR10677672	SAMN13549372	Bos_taurus	PRJNA595353	Uterine_endometrial_tissue	Uterine	NA	NA	NA	17263911	17214085	0.997114	1693413262	1688676080
SRR10677673	SAMN13549423	Bos_taurus	PRJNA595353	Uterine_endometrial_tissue	Uterine	NA	NA	NA	20062005	20011064	0.997461	1965368317	1960536571
SRR10677674	SAMN13549422	Bos_taurus	PRJNA595353	Uterine_endometrial_tissue	Uterine	NA	NA	NA	16958972	16849208	0.993528	1663149679	1652609747
SRR10677675	SAMN13549421	Bos_taurus	PRJNA595353	Uterine_endometrial_tissue	Uterine	NA	NA	NA	15635180	15594436	0.997394	1532488312	1528629033
SRR10677676	SAMN13549420	Bos_taurus	PRJNA595353	Uterine_endometrial_tissue	Uterine	NA	NA	NA	18414951	18357107	0.996859	1801954898	1796481381
SRR10677677	SAMN13549419	Bos_taurus	PRJNA595353	Uterine_endometrial_tissue	Uterine	NA	NA	NA	17070898	17024455	0.997279	1672293432	1667894630
SRR10677678	SAMN13549418	Bos_taurus	PRJNA595353	Uterine_endometrial_tissue	Uterine	NA	NA	NA	16209141	16174469	0.997861	1585662347	1582404384
SRR10677679	SAMN13549417	Bos_taurus	PRJNA595353	Uterine_endometrial_tissue	Uterine	NA	NA	NA	17292228	17240469	0.997007	1693358888	1688426128
SRR10677680	SAMN13549416	Bos_taurus	PRJNA595353	Uterine_endometrial_tissue	Uterine	NA	NA	NA	16141495	16088650	0.996726	1581982046	1576969210
SRR10677681	SAMN13549415	Bos_taurus	PRJNA595353	Uterine_endometrial_tissue	Uterine	NA	NA	NA	17474075	17429320	0.997439	1705928430	1701722373
SRR10677682	SAMN13549414	Bos_taurus	PRJNA595353	Uterine_endometrial_tissue	Uterine	NA	NA	NA	17400684	17340333	0.996532	1700634877	1694902056
SRR10677683	SAMN13549413	Bos_taurus	PRJNA595353	Uterine_endometrial_tissue	Uterine	NA	NA	NA	16563558	16525598	0.997708	1618611202	1615045583
SRR10677684	SAMN13549412	Bos_taurus	PRJNA595353	Uterine_endometrial_tissue	Uterine	NA	NA	NA	14942451	14908511	0.997729	1462483877	1459294098
SRR10677685	SAMN13549411	Bos_taurus	PRJNA595353	Uterine_endometrial_tissue	Uterine	NA	NA	NA	17801761	17729549	0.995944	1741605950	1734706949
SRR10677686	SAMN13549410	Bos_taurus	PRJNA595353	Uterine_endometrial_tissue	Uterine	NA	NA	NA	17026327	16967162	0.996525	1670507156	1664853487
SRR10677687	SAMN13549409	Bos_taurus	PRJNA595353	Uterine_endometrial_tissue	Uterine	NA	NA	NA	16460391	16368328	0.994407	1615117151	1606298978
SRR10677688	SAMN13549408	Bos_taurus	PRJNA595353	Uterine_endometrial_tissue	Uterine	NA	NA	NA	17148705	17046625	0.994047	1682424863	1672652833
SRR10677689	SAMN13549407	Bos_taurus	PRJNA595353	Uterine_endometrial_tissue	Uterine	NA	NA	NA	16774181	16673078	0.993973	1644638541	1634986864
SRR10677690	SAMN13549406	Bos_taurus	PRJNA595353	Uterine_endometrial_tissue	Uterine	NA	NA	NA	14494663	14417475	0.994675	1421459642	1414073370
SRR10677691	SAMN13549433	Bos_taurus	PRJNA595353	Uterine_endometrial_tissue	Uterine	NA	NA	NA	14887763	14812672	0.994956	1459504409	1452308948
SRR10677692	SAMN13549432	Bos_taurus	PRJNA595353	Uterine_endometrial_tissue	Uterine	NA	NA	NA	17288419	17216217	0.995824	1691847749	1684966304
SRR10677693	SAMN13549431	Bos_taurus	PRJNA595353	Uterine_endometrial_tissue	Uterine	NA	NA	NA	16451621	16349618	0.9938	1610832106	1601057941
SRR10677694	SAMN13549430	Bos_taurus	PRJNA595353	Uterine_endometrial_tissue	Uterine	NA	NA	NA	16774711	16679490	0.994324	1642020462	1632886693
SRR10677695	SAMN13549429	Bos_taurus	PRJNA595353	Uterine_endometrial_tissue	Uterine	NA	NA	NA	17244939	17159433	0.995042	1689342538	1681154114
SRR10677696	SAMN13549428	Bos_taurus	PRJNA595353	Uterine_endometrial_tissue	Uterine	NA	NA	NA	16134603	16068319	0.995892	1582214534	1575895845
SRR10677697	SAMN13549427	Bos_taurus	PRJNA595353	Uterine_endometrial_tissue	Uterine	NA	NA	NA	18100242	18021741	0.995663	1770301941	1762819977
SRR10677698	SAMN13549426	Bos_taurus	PRJNA595353	Uterine_endometrial_tissue	Uterine	NA	NA	NA	16769718	16670496	0.994083	1641482690	1631995462
SRR10677699	SAMN13549425	Bos_taurus	PRJNA595353	Uterine_endometrial_tissue	Uterine	NA	NA	NA	18062465	17974119	0.995109	1766319820	1757821887
SRR10677700	SAMN13549424	Bos_taurus	PRJNA595353	Uterine_endometrial_tissue	Uterine	NA	NA	NA	16666830	16589264	0.995346	1632195439	1624786811
SRR10677701	SAMN13549375	Bos_taurus	PRJNA595353	Uterine_endometrial_tissue	Uterine	NA	NA	NA	17490096	17402668	0.995001	1711800165	1703439548
SRR10677702	SAMN13549374	Bos_taurus	PRJNA595353	Uterine_endometrial_tissue	Uterine	NA	NA	NA	17344238	17236635	0.993796	1699627338	1689278321
SRR10682978	SAMN13552952	Bos_taurus	PRJNA595402	Jej_LN	Jejunum	Holstein	male	10-14_days	24558308	22686618	0.923786	1841627751	1702162580
SRR10682979	SAMN13552951	Bos_taurus	PRJNA595402	Jej_PP	Jejunum	Holstein	male	10-14_days	21284331	19815739	0.931001	1596701864	1487259782
SRR10682982	SAMN13552948	Bos_taurus	PRJNA595402	Jej_LN	Jejunum	Holstein	male	10-14_days	20754956	19376158	0.933568	1557316442	1454515021
SRR10682983	SAMN13552947	Bos_taurus	PRJNA595402	Jej_PP	Jejunum	Holstein	male	10-14_days	21881886	20376726	0.931214	1639918260	1528109361
SRR10682986	SAMN13552944	Bos_taurus	PRJNA595402	Jej_LN	Jejunum	Holstein	male	10-14_days	27823678	26000110	0.93446	2086633016	1951070256
SRR10682987	SAMN13552943	Bos_taurus	PRJNA595402	Jej_PP	Jejunum	Holstein	male	10-14_days	28993723	27000267	0.931245	2174343366	2025898594
SRR10682990	SAMN13552940	Bos_taurus	PRJNA595402	Jej_LN	Jejunum	Holstein	male	10-14_days	24894490	23079660	0.927099	1867004375	1731782904
SRR10682991	SAMN13552939	Bos_taurus	PRJNA595402	Jej_PP	Jejunum	Holstein	male	10-14_days	30032005	27895903	0.928872	2253923049	2094693512
SRR10682994	SAMN13552936	Bos_taurus	PRJNA595402	Jej_LN	Jejunum	Holstein	male	10-14_days	19069750	17864200	0.936782	1431039970	1341238610
SRR10682995	SAMN13552935	Bos_taurus	PRJNA595402	Jej_PP	Jejunum	Holstein	male	10-14_days	70774475	65531645	0.925922	5306491414	4916005414
SRR10682997	SAMN13552933	Bos_taurus	PRJNA595402	Jej_LN	Jejunum	Holstein	male	10-14_days	27530153	26133357	0.949263	2062323610	1959068840
SRR10682998	SAMN13552932	Bos_taurus	PRJNA595402	Jej_PP	Jejunum	Holstein	male	10-14_days	28276553	25417543	0.898891	2122244642	1908297486
SRR10683003	SAMN13552969	Bos_taurus	PRJNA595402	Jej_LN	Jejunum	Holstein	male	10-14_days	4449471	4263785	0.958268	333651271	319955736
SRR10683004	SAMN13552927	Bos_taurus	PRJNA595402	Jej_PP	Jejunum	Holstein	male	10-14_days	5125229	4997941	0.975164	384274314	374948418
SRR10683005	SAMN13552968	Bos_taurus	PRJNA595402	Jej_LN	Jejunum	Holstein	male	10-14_days	95349525	88782515	0.931127	7152802420	6663822504
SRR10683006	SAMN13552897	Bos_taurus	PRJNA595402	Jej_PP	Jejunum	Holstein	male	10-14_days	29314689	27132185	0.925549	2194152787	2032251081
SRR10683008	SAMN13552925	Bos_taurus	PRJNA595402	Jej_LN	Jejunum	Holstein	male	10-14_days	4060769	3896021	0.959429	304880988	292652830
SRR10683009	SAMN13552924	Bos_taurus	PRJNA595402	Jej_PP	Jejunum	Holstein	male	10-14_days	12438852	11985742	0.963573	933853923	900239653
SRR10683010	SAMN13552923	Bos_taurus	PRJNA595402	Jej_LN	Jejunum	Holstein	male	10-14_days	25914359	24153023	0.932032	1944240033	1812882284
SRR10683011	SAMN13552922	Bos_taurus	PRJNA595402	Jej_PP	Jejunum	Holstein	male	10-14_days	23286136	21819268	0.937007	1747972072	1638652061
SRR10683014	SAMN13552919	Bos_taurus	PRJNA595402	Jej_LN	Jejunum	Holstein	male	10-14_days	14211739	14105738	0.992541	1343787271	1334655256
SRR10683015	SAMN13552918	Bos_taurus	PRJNA595402	Jej_PP	Jejunum	Holstein	male	10-14_days	12310610	12214777	0.992215	1170831855	1162385005
SRR10683018	SAMN13552915	Bos_taurus	PRJNA595402	Jej_LN	Jejunum	Holstein	male	10-14_days	12005471	11910234	0.992067	1144575217	1136105753
SRR10683019	SAMN13552914	Bos_taurus	PRJNA595402	Jej_PP	Jejunum	Holstein	male	10-14_days	12703068	12614214	0.993005	1201714467	1194063021
SRR10683022	SAMN13552911	Bos_taurus	PRJNA595402	Jej_LN	Jejunum	Holstein	male	10-14_days	16145774	15928389	0.986536	1551639375	1531617458
SRR10683023	SAMN13552910	Bos_taurus	PRJNA595402	Jej_PP	Jejunum	Holstein	male	10-14_days	16670193	16534191	0.991842	1579972807	1568262485
SRR10683026	SAMN13552907	Bos_taurus	PRJNA595402	Jej_LN	Jejunum	Holstein	male	10-14_days	14410950	14299391	0.992259	1368743307	1358889259
SRR10683027	SAMN13552906	Bos_taurus	PRJNA595402	Jej_PP	Jejunum	Holstein	male	10-14_days	17258424	17090810	0.990288	1647993167	1632907063
SRR10683030	SAMN13552903	Bos_taurus	PRJNA595402	Jej_LN	Jejunum	Holstein	male	10-14_days	10965615	10880634	0.99225	1048886303	1041312130
SRR10683031	SAMN13552900	Bos_taurus	PRJNA595402	Jej_PP	Jejunum	Holstein	male	10-14_days	40751599	40429856	0.992105	3846015127	3817879600
SRR10683033	SAMN13552898	Bos_taurus	PRJNA595402	Jej_LN	Jejunum	Holstein	male	10-14_days	16162031	16021085	0.991279	1562830093	1550166540
SRR10683034	SAMN13552966	Bos_taurus	PRJNA595402	Jej_PP	Jejunum	Holstein	male	10-14_days	16181587	16055696	0.99222	1498784337	1487921883
SRR10683039	SAMN13552963	Bos_taurus	PRJNA595402	Jej_LN	Jejunum	Holstein	male	10-14_days	2569906	2551620	0.992885	246758536	245199500
SRR10683040	SAMN13552962	Bos_taurus	PRJNA595402	Jej_PP	Jejunum	Holstein	male	10-14_days	2972896	2957517	0.994827	290512917	289175281
SRR10683041	SAMN13552961	Bos_taurus	PRJNA595402	Jej_LN	Jejunum	Holstein	male	10-14_days	54925101	54418533	0.990777	5233820508	5188451356
SRR10683042	SAMN13552960	Bos_taurus	PRJNA595402	Jej_PP	Jejunum	Holstein	male	10-14_days	17194169	17030470	0.990479	1620172714	1605967660
SRR10683045	SAMN13552958	Bos_taurus	PRJNA595402	Jej_LN	Jejunum	Holstein	male	10-14_days	2326227	2309611	0.992857	223690451	222224137
SRR10683046	SAMN13552957	Bos_taurus	PRJNA595402	Jej_PP	Jejunum	Holstein	male	10-14_days	7155161	7114054	0.994255	690561703	687013126
SRR10683047	SAMN13552956	Bos_taurus	PRJNA595402	Jej_LN	Jejunum	Holstein	male	10-14_days	14883869	14779901	0.993015	1412561050	1403560088
SRR10683048	SAMN13552955	Bos_taurus	PRJNA595402	Jej_PP	Jejunum	Holstein	male	10-14_days	13394484	13270811	0.990767	1282283671	1271069955
SRR10877271	SAMN13763753	Bos_taurus	PRJNA600004	Whole_blood	Whole_blood	Holstein	neuter	2-3_months	54991838	51529068	0.937031	5290491403	4992439095
SRR10877272	SAMN13763752	Bos_taurus	PRJNA600004	Whole_blood	Whole_blood	Holstein	neuter	2-3_months	47044626	44128656	0.938017	4521916180	4271323538
SRR10877273	SAMN13763751	Bos_taurus	PRJNA600004	Whole_blood	Whole_blood	Holstein	neuter	2-3_months	47116302	42094122	0.893409	4662539704	4171067353
SRR10877274	SAMN13763750	Bos_taurus	PRJNA600004	Whole_blood	Whole_blood	Holstein	neuter	2-3_months	45327261	42298675	0.933184	4346038260	4087066612
SRR10877275	SAMN13763749	Bos_taurus	PRJNA600004	Whole_blood	Whole_blood	Holstein	neuter	2-3_months	45146619	41750997	0.924787	4334920654	4039374600
SRR10877276	SAMN13763748	Bos_taurus	PRJNA600004	Whole_blood	Whole_blood	Holstein	neuter	2-3_months	47080268	44623442	0.947816	4663071392	4423314574
SRR10877277	SAMN13763782	Bos_taurus	PRJNA600004	Whole_blood	Whole_blood	Holstein	neuter	2-3_months	46652207	43831131	0.93953	4484080312	4240710738
SRR10877278	SAMN13763781	Bos_taurus	PRJNA600004	Whole_blood	Whole_blood	Holstein	neuter	2-3_months	47795308	44458252	0.93018	4588287353	4300181274
SRR10877279	SAMN13763780	Bos_taurus	PRJNA600004	Whole_blood	Whole_blood	Holstein	neuter	2-3_months	34949519	31989575	0.915308	3336749738	3085911388
SRR10877280	SAMN13763779	Bos_taurus	PRJNA600004	Whole_blood	Whole_blood	Holstein	neuter	2-3_months	48128472	44433970	0.923237	4607777279	4292177767
SRR10877281	SAMN13763778	Bos_taurus	PRJNA600004	Whole_blood	Whole_blood	Holstein	neuter	2-3_months	45456307	41779655	0.919117	4370364293	4047110598
SRR10877282	SAMN13763777	Bos_taurus	PRJNA600004	Whole_blood	Whole_blood	Holstein	neuter	2-3_months	55802547	44615073	0.799517	5515860629	4426450458
SRR10877283	SAMN13763776	Bos_taurus	PRJNA600004	Whole_blood	Whole_blood	Holstein	neuter	2-3_months	50141941	44876229	0.894984	4960066606	4448759674
SRR10877284	SAMN13763775	Bos_taurus	PRJNA600004	Whole_blood	Whole_blood	Holstein	neuter	2-3_months	37690908	35413468	0.939576	3630226464	3431955994
SRR10877285	SAMN13763774	Bos_taurus	PRJNA600004	Whole_blood	Whole_blood	Holstein	neuter	2-3_months	44912626	41942334	0.933865	4308879181	4055376253
SRR10877286	SAMN13763747	Bos_taurus	PRJNA600004	Whole_blood	Whole_blood	Holstein	neuter	2-3_months	42656907	40015343	0.938074	4107699913	3878899470
SRR10877287	SAMN13763773	Bos_taurus	PRJNA600004	Whole_blood	Whole_blood	Holstein	neuter	2-3_months	45141200	42038794	0.931273	4333579197	4065753784
SRR10877288	SAMN13763772	Bos_taurus	PRJNA600004	Whole_blood	Whole_blood	Holstein	neuter	2-3_months	38375601	35998461	0.938056	3695113001	3488731079
SRR10877289	SAMN13763771	Bos_taurus	PRJNA600004	Whole_blood	Whole_blood	Holstein	neuter	2-3_months	97208591	85070767	0.875136	9574461569	8426480124
SRR10877290	SAMN13763770	Bos_taurus	PRJNA600004	Whole_blood	Whole_blood	Holstein	neuter	2-3_months	45782679	42561499	0.929642	4389732401	4114621213
SRR10877291	SAMN13763769	Bos_taurus	PRJNA600004	Whole_blood	Whole_blood	Holstein	neuter	2-3_months	41081476	38216146	0.930253	3940829749	3695151555
SRR10877292	SAMN13763768	Bos_taurus	PRJNA600004	Whole_blood	Whole_blood	Holstein	neuter	2-3_months	54116633	48921063	0.903993	5178500693	4725694286
SRR10877293	SAMN13763767	Bos_taurus	PRJNA600004	Whole_blood	Whole_blood	Holstein	neuter	2-3_months	45967114	42328092	0.920834	4538128822	4194836850
SRR10877294	SAMN13763766	Bos_taurus	PRJNA600004	Whole_blood	Whole_blood	Holstein	neuter	2-3_months	40401688	37168406	0.919972	3888489126	3601814061
SRR10877295	SAMN13763765	Bos_taurus	PRJNA600004	Whole_blood	Whole_blood	Holstein	neuter	2-3_months	45012335	42315099	0.940078	4335333539	4101963971
SRR10877296	SAMN13763764	Bos_taurus	PRJNA600004	Whole_blood	Whole_blood	Holstein	neuter	2-3_months	47428274	44507108	0.938409	4564148686	4311006561
SRR10877297	SAMN13763746	Bos_taurus	PRJNA600004	Whole_blood	Whole_blood	Holstein	neuter	2-3_months	49768924	46574460	0.935814	4782527453	4506957860
SRR10877298	SAMN13763763	Bos_taurus	PRJNA600004	Whole_blood	Whole_blood	Holstein	neuter	2-3_months	73193445	68094217	0.930332	7020567109	6582751886
SRR10877299	SAMN13763762	Bos_taurus	PRJNA600004	Whole_blood	Whole_blood	Holstein	neuter	2-3_months	35739040	33315092	0.932176	3429190609	3221665880
SRR10877300	SAMN13763761	Bos_taurus	PRJNA600004	Whole_blood	Whole_blood	Holstein	neuter	2-3_months	54464113	51318829	0.94225	5248117418	4979501997
SRR10877301	SAMN13763760	Bos_taurus	PRJNA600004	Whole_blood	Whole_blood	Holstein	neuter	2-3_months	29697363	27542563	0.927441	2847275126	2663202145
SRR10877302	SAMN13763759	Bos_taurus	PRJNA600004	Whole_blood	Whole_blood	Holstein	neuter	2-3_months	39022885	36398987	0.93276	3750053432	3523446535
SRR10877303	SAMN13763758	Bos_taurus	PRJNA600004	Whole_blood	Whole_blood	Holstein	neuter	2-3_months	43168795	39968075	0.925856	4135124867	3861856581
SRR10877304	SAMN13763757	Bos_taurus	PRJNA600004	Whole_blood	Whole_blood	Holstein	neuter	2-3_months	41310984	37474570	0.907133	4073393445	3711283155
SRR10877305	SAMN13763756	Bos_taurus	PRJNA600004	Whole_blood	Whole_blood	Holstein	neuter	2-3_months	70200664	64988454	0.925753	6729587292	6283918486
SRR10877306	SAMN13763755	Bos_taurus	PRJNA600004	Whole_blood	Whole_blood	Holstein	neuter	2-3_months	39060701	36085867	0.923841	3738493309	3483359539
SRR10877307	SAMN13763754	Bos_taurus	PRJNA600004	Whole_blood	Whole_blood	Holstein	neuter	2-3_months	70822359	65966673	0.931439	6819551746	6394543643
SRR10877308	SAMN13763745	Bos_taurus	PRJNA600004	Whole_blood	Whole_blood	Holstein	neuter	2-3_months	42649125	39741195	0.931817	4094664603	3844424484
SRR10877309	SAMN13763744	Bos_taurus	PRJNA600004	Whole_blood	Whole_blood	Holstein	neuter	2-3_months	38797691	35574093	0.916913	3700741356	3427427091
SRR11014349	SAMN13825781	Bos_taurus	PRJNA600538	Embryo	Fetus	NA	NA	NA	19712625	18813933	0.95441	1484101654	1417639964
SRR11014350	SAMN13825779	Bos_taurus	PRJNA600538	Embryo	Fetus	NA	NA	NA	18150248	17116035	0.943019	1368653203	1291437938
SRR11014351	SAMN13825778	Bos_taurus	PRJNA600538	Embryo	Fetus	NA	NA	NA	16978583	15779454	0.929374	1279359644	1190060810
SRR11014352	SAMN13825780	Bos_taurus	PRJNA600538	Embryo	Fetus	NA	NA	NA	15153360	14246157	0.940132	1140764208	1073522391
SRR11014353	SAMN13825777	Bos_taurus	PRJNA600538	Embryo	Fetus	NA	NA	NA	18499507	17618168	0.952359	1393874964	1328786833
SRR11014354	SAMN13825776	Bos_taurus	PRJNA600538	Embryo	Fetus	NA	NA	NA	19247920	18120730	0.941438	1450719831	1366907994
SRR11014355	SAMN13825795	Bos_taurus	PRJNA600538	Embryo	Fetus	NA	NA	NA	18607795	17782664	0.955657	1403028916	1341821179
SRR11014356	SAMN13825793	Bos_taurus	PRJNA600538	Embryo	Fetus	NA	NA	NA	23580009	22269857	0.944438	1775402444	1678352474
SRR11014357	SAMN13825774	Bos_taurus	PRJNA600538	Embryo	Fetus	NA	NA	NA	13066963	12559866	0.961192	985569132	948200673
SRR11014358	SAMN13825790	Bos_taurus	PRJNA600538	Embryo	Fetus	NA	NA	NA	16316271	15464687	0.947808	1231026739	1167586371
SRR11014359	SAMN13825791	Bos_taurus	PRJNA600538	Embryo	Fetus	NA	NA	NA	17858039	17215518	0.964021	1347807212	1300064998
SRR11014360	SAMN13825792	Bos_taurus	PRJNA600538	Embryo	Fetus	NA	NA	NA	15467439	14795255	0.956542	1165635695	1115985838
SRR11014361	SAMN13825794	Bos_taurus	PRJNA600538	Embryo	Fetus	NA	NA	NA	16222064	15235365	0.939175	1221968388	1148649190
SRR11014362	SAMN13825775	Bos_taurus	PRJNA600538	Embryo	Fetus	NA	NA	NA	10813604	9124774	0.843824	810875562	684693289
SRR11014363	SAMN13825789	Bos_taurus	PRJNA600538	Embryo	Fetus	NA	NA	NA	20093024	18969783	0.944098	1511900437	1428661716
SRR11014364	SAMN13825787	Bos_taurus	PRJNA600538	Embryo	Fetus	NA	NA	NA	17203833	15630246	0.908533	1295136263	1177666915
SRR11014365	SAMN13825785	Bos_taurus	PRJNA600538	Embryo	Fetus	NA	NA	NA	18300233	17644907	0.96419	1379637186	1331192233
SRR11014366	SAMN13825783	Bos_taurus	PRJNA600538	Embryo	Fetus	NA	NA	NA	17058666	15634081	0.916489	1284130907	1178240300
SRR11014367	SAMN13825782	Bos_taurus	PRJNA600538	Embryo	Fetus	NA	NA	NA	17942606	16795619	0.936075	1352162906	1267290030
SRR11014368	SAMN13825784	Bos_taurus	PRJNA600538	Embryo	Fetus	NA	NA	NA	20102809	19287986	0.959467	1516895244	1456447468
SRR11014369	SAMN13825786	Bos_taurus	PRJNA600538	Embryo	Fetus	NA	NA	NA	17724626	16606747	0.936931	1335554355	1252526081
SRR11014370	SAMN13825788	Bos_taurus	PRJNA600538	Embryo	Fetus	NA	NA	NA	24193475	22727186	0.939393	1823865326	1714810626
SRR11014371	SAMN13825773	Bos_taurus	PRJNA600538	Embryo	Fetus	NA	NA	NA	19824993	19040685	0.960438	1494516065	1436673362
SRR11014372	SAMN13825772	Bos_taurus	PRJNA600538	Embryo	Fetus	NA	NA	NA	13705787	13189407	0.962324	1033803369	995710730
SRR11050958	SAMN14074797	Bos_taurus	PRJNA605719	Whole_blood	Whole_blood	Holstein	female	NA	50264816	49038666	0.975606	7452517134	7282250972
SRR11050959	SAMN14074796	Bos_taurus	PRJNA605719	Whole_blood	Whole_blood	Holstein	female	NA	42114181	41084281	0.975545	6241857072	6097202233
SRR11050960	SAMN14074795	Bos_taurus	PRJNA605719	Whole_blood	Whole_blood	Holstein	female	NA	61367620	59204930	0.964758	9094561320	8788953500
SRR11050961	SAMN14074794	Bos_taurus	PRJNA605719	Whole_blood	Whole_blood	Holstein	female	NA	45574061	44287629	0.971773	6754847781	6573650422
SRR11050962	SAMN14074793	Bos_taurus	PRJNA605719	Whole_blood	Whole_blood	Holstein	female	NA	55522804	53843764	0.969759	8229768059	7992500555
SRR11050963	SAMN14074792	Bos_taurus	PRJNA605719	Whole_blood	Whole_blood	Holstein	female	NA	56168666	54502352	0.970334	8326353071	8089575886
SRR11050964	SAMN14074791	Bos_taurus	PRJNA605719	Whole_blood	Whole_blood	Holstein	female	NA	51063988	49667860	0.972659	7578069064	7378218369
SRR11050965	SAMN14074811	Bos_taurus	PRJNA605719	Whole_blood	Whole_blood	Holstein	female	NA	48688423	47395101	0.973437	7213589535	7029491613
SRR11050966	SAMN14074810	Bos_taurus	PRJNA605719	Whole_blood	Whole_blood	Holstein	female	NA	45696213	44627099	0.976604	6770670836	6621459231
SRR11050967	SAMN14074809	Bos_taurus	PRJNA605719	Whole_blood	Whole_blood	Holstein	female	NA	59177730	57918240	0.978717	8769335700	8595362921
SRR11050968	SAMN14074808	Bos_taurus	PRJNA605719	Whole_blood	Whole_blood	Holstein	female	NA	49735249	48564969	0.97647	7370603648	7207671692
SRR11050969	SAMN14074790	Bos_taurus	PRJNA605719	Whole_blood	Whole_blood	Holstein	female	NA	63408613	61298477	0.966722	9398168889	9097088080
SRR11050970	SAMN14074807	Bos_taurus	PRJNA605719	Whole_blood	Whole_blood	Holstein	female	NA	51193868	49540078	0.967696	7587901574	7353655595
SRR11050971	SAMN14074806	Bos_taurus	PRJNA605719	Whole_blood	Whole_blood	Holstein	female	NA	47182821	46030931	0.975587	6995436757	6833017098
SRR11050972	SAMN14074805	Bos_taurus	PRJNA605719	Whole_blood	Whole_blood	Holstein	female	NA	50847972	49187042	0.967335	7537904082	7301589763
SRR11050973	SAMN14074804	Bos_taurus	PRJNA605719	Whole_blood	Whole_blood	Holstein	female	NA	50551353	49267729	0.974608	7488191040	7309986159
SRR11050974	SAMN14074803	Bos_taurus	PRJNA605719	Whole_blood	Whole_blood	Holstein	female	NA	58889463	56845669	0.965294	8732128328	8439790344
SRR11050975	SAMN14074802	Bos_taurus	PRJNA605719	Whole_blood	Whole_blood	Holstein	female	NA	50969985	49445691	0.970094	7565296469	7345465176
SRR11050976	SAMN14074801	Bos_taurus	PRJNA605719	Whole_blood	Whole_blood	Holstein	female	NA	53835780	52738212	0.979613	7987412506	7831862818
SRR11050977	SAMN14074800	Bos_taurus	PRJNA605719	Whole_blood	Whole_blood	Holstein	female	NA	48390757	47218483	0.975775	7183354623	7018604287
SRR11050978	SAMN14074799	Bos_taurus	PRJNA605719	Whole_blood	Whole_blood	Holstein	female	NA	50433100	49262134	0.976782	7479567301	7313836104
SRR11050979	SAMN14074798	Bos_taurus	PRJNA605719	Whole_blood	Whole_blood	Holstein	female	NA	43231325	41947475	0.970303	6410594614	6228701106
SRR11050980	SAMN14074789	Bos_taurus	PRJNA605719	Whole_blood	Whole_blood	Holstein	female	NA	41510126	40636248	0.978948	6155644745	6031063979
SRR11050981	SAMN14074788	Bos_taurus	PRJNA605719	Whole_blood	Whole_blood	Holstein	female	NA	49502413	48094525	0.971559	7339709736	7140693604
SRR11445142	SAMN14482779	Bos_taurus	PRJNA616134	Milk_somatic_cell	Milk_cell	Holstein	female	4.7	233998408	203987182	0.871746	34218550005	29816812219
SRR11445143	SAMN14482777	Bos_taurus	PRJNA616134	White_blood_cell	White_cell	Holstein	female	4.7	70924192	56769410	0.800424	10330785414	8243231825
SRR11445144	SAMN14482778	Bos_taurus	PRJNA616134	Milk_somatic_cell	Milk_cell	Holstein	female	4.7	158281160	128785128	0.813648	22845428174	18516800220
SRR11445145	SAMN14482776	Bos_taurus	PRJNA616134	White_blood_cell	White_cell	Holstein	female	5.6	78632533	65182407	0.82895	11466400438	9493481982
SRR11445146	SAMN14482775	Bos_taurus	PRJNA616134	Milk_somatic_cell	Milk_cell	Holstein	female	5.6	232272497	204270197	0.879442	33644313484	29535950257
SRR11445147	SAMN14482817	Bos_taurus	PRJNA616134	Milk_somatic_cell	Milk_cell	Holstein	female	5.6	127315407	102420541	0.804463	18482267867	14826359748
SRR11445148	SAMN14482816	Bos_taurus	PRJNA616134	White_blood_cell	White_cell	Holstein	female	5.7	79456284	69256378	0.871629	11489573220	10000096369
SRR11445149	SAMN14482815	Bos_taurus	PRJNA616134	Milk_somatic_cell	Milk_cell	Holstein	female	5.7	146446161	119468641	0.815785	21375389062	17390994508
SRR11445150	SAMN14482814	Bos_taurus	PRJNA616134	White_blood_cell	White_cell	Holstein	female	5.7	62668745	54052043	0.862504	8913863179	7677218347
SRR11445151	SAMN14482813	Bos_taurus	PRJNA616134	Milk_somatic_cell	Milk_cell	Holstein	female	6.6	167081612	140753000	0.842421	24338487583	20454527923
SRR11445152	SAMN14482812	Bos_taurus	PRJNA616134	White_blood_cell	White_cell	Holstein	female	6.6	110932353	84988921	0.766133	16226373912	12380710943
SRR11445153	SAMN14482811	Bos_taurus	PRJNA616134	Milk_somatic_cell	Milk_cell	Holstein	female	6.6	282501525	240677951	0.851953	41049808191	34907061997
SRR11445154	SAMN14482810	Bos_taurus	PRJNA616134	White_blood_cell	White_cell	Holstein	female	6.6	69477341	58993989	0.849111	10069416597	8538114096
SRR11445155	SAMN14482774	Bos_taurus	PRJNA616134	White_blood_cell	White_cell	Holstein	female	5.6	88746958	76131430	0.857848	12898176891	11048833031
SRR11445156	SAMN14482809	Bos_taurus	PRJNA616134	White_blood_cell	White_cell	Holstein	female	6.6	100593133	87869215	0.873511	14458203829	12605545077
SRR11445157	SAMN14482808	Bos_taurus	PRJNA616134	Milk_somatic_cell	Milk_cell	Holstein	female	6.6	108555771	90530829	0.833957	15604989223	12970744591
SRR11445158	SAMN14482807	Bos_taurus	PRJNA616134	White_blood_cell	White_cell	Holstein	female	6.6	107679710	94723656	0.87968	15636663749	13737700944
SRR11445159	SAMN14482806	Bos_taurus	PRJNA616134	White_blood_cell	White_cell	Holstein	female	7.7	88062899	71532785	0.812292	12754337579	10347635469
SRR11445160	SAMN14482805	Bos_taurus	PRJNA616134	Milk_somatic_cell	Milk_cell	Holstein	female	7.7	156747432	130280536	0.831149	22475197052	18818869448
SRR11445161	SAMN14482804	Bos_taurus	PRJNA616134	White_blood_cell	White_cell	Holstein	female	8.7	67120848	56291340	0.838657	9771483669	8177497668
SRR11445162	SAMN14482803	Bos_taurus	PRJNA616134	White_blood_cell	White_cell	Holstein	female	4.7	93724759	75182397	0.802162	13688610699	10947495176
SRR11445164	SAMN14482800	Bos_taurus	PRJNA616134	White_blood_cell	White_cell	Holstein	female	5.6	70057374	55545486	0.792857	10253519612	8105883707
SRR11445165	SAMN14482801	Bos_taurus	PRJNA616134	Milk_somatic_cell	Milk_cell	Holstein	female	6.6	54512009	44884395	0.823385	7934803226	6525362973
SRR11445166	SAMN14482773	Bos_taurus	PRJNA616134	White_blood_cell	White_cell	Holstein	female	6.6	69122129	58697867	0.849191	10052155958	8524511006
SRR11445167	SAMN14482799	Bos_taurus	PRJNA616134	Milk_somatic_cell	Milk_cell	Holstein	female	5.6	126447813	104891169	0.829521	18277521154	15109371143
SRR11445168	SAMN14482798	Bos_taurus	PRJNA616134	White_blood_cell	White_cell	Holstein	female	5.6	71495761	58748779	0.82171	10382704032	8505898027
SRR11445169	SAMN14482797	Bos_taurus	PRJNA616134	White_blood_cell	White_cell	Holstein	female	5.6	98462129	88759239	0.901456	14238087223	12826744547
SRR11445170	SAMN14482796	Bos_taurus	PRJNA616134	Milk_somatic_cell	Milk_cell	Holstein	female	5.6	152795586	129702472	0.848863	22287337193	18880911188
SRR11445171	SAMN14482794	Bos_taurus	PRJNA616134	Milk_somatic_cell	Milk_cell	Holstein	female	5.7	151221985	130497851	0.862956	22087177510	19033609645
SRR11445172	SAMN14482795	Bos_taurus	PRJNA616134	White_blood_cell	White_cell	Holstein	female	5.6	66310034	58021206	0.874999	9647147679	8437546538
SRR11445173	SAMN14482793	Bos_taurus	PRJNA616134	Milk_somatic_cell	Milk_cell	Holstein	female	6.6	186796094	164534376	0.880823	27059989422	23799877270
SRR11445174	SAMN14482792	Bos_taurus	PRJNA616134	White_blood_cell	White_cell	Holstein	female	6.6	108779161	95525249	0.878158	15866820053	13919748423
SRR11445175	SAMN14482791	Bos_taurus	PRJNA616134	Milk_somatic_cell	Milk_cell	Holstein	female	6.6	204872782	184033352	0.898281	29929995200	26859863173
SRR11445176	SAMN14482772	Bos_taurus	PRJNA616134	Milk_somatic_cell	Milk_cell	Holstein	female	6.6	203433103	181436009	0.891871	29545361280	26326319389
SRR11445177	SAMN14482790	Bos_taurus	PRJNA616134	White_blood_cell	White_cell	Holstein	female	6.6	68634781	53525625	0.779862	10023453690	7817170138
SRR11445178	SAMN14482789	Bos_taurus	PRJNA616134	Milk_somatic_cell	Milk_cell	Holstein	female	6.6	182770223	157835037	0.863571	26578135343	22903683451
SRR11445179	SAMN14482788	Bos_taurus	PRJNA616134	White_blood_cell	White_cell	Holstein	female	6.6	86314871	75231909	0.871598	12575330522	10946932244
SRR11445180	SAMN14482787	Bos_taurus	PRJNA616134	Milk_somatic_cell	Milk_cell	Holstein	female	6.6	152969033	132337959	0.865129	22314295296	19272066866
SRR11445181	SAMN14482785	Bos_taurus	PRJNA616134	Milk_somatic_cell	Milk_cell	Holstein	female	6.6	235795158	210973012	0.89473	34429194447	30776694239
SRR11445182	SAMN14482786	Bos_taurus	PRJNA616134	White_blood_cell	White_cell	Holstein	female	6.6	88122258	70986486	0.805545	12873244019	10339047599
SRR11445183	SAMN14482784	Bos_taurus	PRJNA616134	Milk_somatic_cell	Milk_cell	Holstein	female	7.7	136524783	102075843	0.747673	19941234389	14854946030
SRR11445184	SAMN14482783	Bos_taurus	PRJNA616134	White_blood_cell	White_cell	Holstein	female	7.7	68377115	55799457	0.816055	10017535149	8161213224
SRR11445185	SAMN14482782	Bos_taurus	PRJNA616134	Milk_somatic_cell	Milk_cell	Holstein	female	8.7	204060126	182145292	0.892606	29661778111	26444876839
SRR11445186	SAMN14482780	Bos_taurus	PRJNA616134	Milk_somatic_cell	Milk_cell	Holstein	female	8.7	193808619	165081029	0.851773	28229042731	23998622858
SRR11445187	SAMN14482781	Bos_taurus	PRJNA616134	White_blood_cell	White_cell	Holstein	female	8.7	87824607	77420195	0.881532	12731525729	11212502683
SRR11445188	SAMN14482771	Bos_taurus	PRJNA616134	White_blood_cell	White_cell	Holstein	female	6.6	89528500	80191396	0.895708	12894905652	11539338134
SRR11445189	SAMN14482770	Bos_taurus	PRJNA616134	Milk_somatic_cell	Milk_cell	Holstein	female	5.6	140257966	117139682	0.835173	20417331688	17066345510
SRR11569581	SAMN14641678	Bos_indicus	PRJNA626458	Liver	Liver	NA	male	fetus	74728806	71167632	0.952345	7184085663	6846355981
SRR11569582	SAMN14641677	Bos_taurus	PRJNA626458	Liver	Liver	NA	male	fetus	56116385	53883999	0.960219	5387037442	5176339887
SRR11569812	SAMN14641646	Bos_taurus_x_Bos_indicus	PRJNA626458	Muscle	Muscle	NA	female	fetus	155895905	138722085	0.889838	15246158486	13594796304
SRR11569813	SAMN14641645	Bos_taurus_x_Bos_indicus	PRJNA626458	Muscle	Muscle	NA	female	fetus	147344767	131396483	0.891762	14394544480	12867363203
SRR11569816	SAMN14641643	Bos_taurus	PRJNA626458	Muscle	Muscle	NA	female	fetus	159497379	147666709	0.925825	15605796064	14486277315
SRR11569817	SAMN14641642	Bos_indicus	PRJNA626458	Muscle	Muscle	NA	male	fetus	163145968	142537860	0.873683	15942613109	13969224566
SRR11569818	SAMN14641641	Bos_taurus	PRJNA626458	Muscle	Muscle	NA	female	fetus	146090878	134894246	0.923358	14297453764	13232244055
SRR11569819	SAMN14641640	Bos_taurus_x_Bos_indicus	PRJNA626458	Muscle	Muscle	NA	male	fetus	180238453	162252851	0.900212	17668065966	15924160156
SRR11569820	SAMN14641639	Bos_indicus	PRJNA626458	Muscle	Muscle	NA	female	fetus	122949801	109564903	0.891135	12044758729	10752553120
SRR11569821	SAMN14641638	Bos_taurus_x_Bos_indicus	PRJNA626458	Muscle	Muscle	NA	female	fetus	123269876	107058312	0.868487	12058733686	10492401313
SRR11569822	SAMN14641637	Bos_taurus	PRJNA626458	Muscle	Muscle	NA	male	fetus	137224954	119190926	0.868581	13418326196	11678735202
SRR11569823	SAMN14641636	Bos_taurus_x_Bos_indicus	PRJNA626458	Muscle	Muscle	NA	female	fetus	184035400	166202192	0.903099	18025306431	16315599964
SRR11569826	SAMN14641634	Bos_taurus	PRJNA626458	Muscle	Muscle	NA	female	fetus	141086186	121785754	0.863201	13789325692	11928974700
SRR11569829	SAMN14641632	Bos_taurus_x_Bos_indicus	PRJNA626458	Muscle	Muscle	NA	female	fetus	154285128	130808896	0.847839	15107097325	12829023058
SRR11569830	SAMN14641631	Bos_indicus	PRJNA626458	Muscle	Muscle	NA	female	fetus	180754234	162078002	0.896676	17684554665	15898659360
SRR11569831	SAMN14641630	Bos_taurus_x_Bos_indicus	PRJNA626458	Muscle	Muscle	NA	male	fetus	125675518	113809094	0.905579	12311685864	11165647968
SRR11569834	SAMN14641628	Bos_indicus	PRJNA626458	Muscle	Muscle	NA	male	fetus	212080228	193062658	0.910328	20793433389	18956459652
SRR11569837	SAMN14641667	Bos_taurus_x_Bos_indicus	PRJNA626458	Muscle	Muscle	NA	male	fetus	172544895	156774405	0.908601	16885926166	15376119756
SRR11569840	SAMN14641665	Bos_taurus_x_Bos_indicus	PRJNA626458	Muscle	Muscle	NA	female	fetus	137835225	122178255	0.886408	13483842541	11973579832
SRR11586292	SAMN14667877	Bos_taurus	PRJNA627332	Fetus	Fetus	Holstein	NA	not_applicable	10735650	10681856	0.994989	536234046	533562056
SRR11586293	SAMN14667876	Bos_taurus	PRJNA627332	Fetus	Fetus	Holstein	NA	not_applicable	23719893	23590888	0.994561	1184573720	1178164540
SRR11586294	SAMN14667875	Bos_taurus	PRJNA627332	Fetus	Fetus	Holstein	NA	not_applicable	20309329	20218765	0.995541	1014650802	1010152823
SRR11586295	SAMN14667874	Bos_taurus	PRJNA627332	Fetus	Fetus	Holstein	NA	not_applicable	42698511	42491445	0.995151	2132197542	2121924458
SRR11586296	SAMN14667873	Bos_taurus	PRJNA627332	Fetus	Fetus	Holstein	NA	not_applicable	25690877	25603575	0.996602	1283490357	1279161558
SRR11586297	SAMN14667872	Bos_taurus	PRJNA627332	Fetus	Fetus	Holstein	NA	not_applicable	22842374	22752752	0.996077	1140917098	1136473724
SRR11586298	SAMN14667871	Bos_taurus	PRJNA627332	Fetus	Fetus	Holstein	NA	not_applicable	34550946	34413912	0.996034	1725623647	1718831248
SRR11586299	SAMN14667870	Bos_taurus	PRJNA627332	Fetus	Fetus	Holstein	NA	not_applicable	35754428	35604979	0.99582	1785415382	1778006397
SRR11586300	SAMN14667869	Bos_taurus	PRJNA627332	Fetus	Fetus	Holstein	NA	not_applicable	18451763	18383584	0.996305	921778582	918397497
SRR11596130	SAMN14677678	Bos_taurus	PRJNA627642	Mammary	Mammary	Holstein	NA	NA	27298428	27091962	0.992437	2701206934	2681167094
SRR11596131	SAMN14677677	Bos_taurus	PRJNA627642	Mammary	Mammary	Holstein	NA	NA	23407910	23337459	0.99699	2316523754	2309889355
SRR11596132	SAMN14677676	Bos_taurus	PRJNA627642	Mammary	Mammary	Holstein	NA	NA	22957917	22798512	0.993057	2272126077	2256710559
SRR11596133	SAMN14677675	Bos_taurus	PRJNA627642	Mammary	Mammary	Holstein	NA	NA	26310239	26228691	0.996901	2602224409	2594432291
SRR11596134	SAMN14677674	Bos_taurus	PRJNA627642	Mammary	Mammary	Holstein	NA	NA	21931155	21811686	0.994553	2168635988	2157246718
SRR11596135	SAMN14677673	Bos_taurus	PRJNA627642	Mammary	Mammary	Holstein	NA	NA	26397415	26285626	0.995765	2614317539	2603647078
SRR11596136	SAMN14677672	Bos_taurus	PRJNA627642	Mammary	Mammary	Holstein	NA	NA	20453242	20359636	0.995423	2022728581	2013811529
SRR11596137	SAMN14677671	Bos_taurus	PRJNA627642	Mammary	Mammary	Holstein	NA	NA	28699870	28628729	0.997521	2842842604	2836174797
SRR11596138	SAMN14677670	Bos_taurus	PRJNA627642	Mammary	Mammary	Holstein	NA	NA	24723518	24646659	0.996891	2447879772	2440545148
SRR11596139	SAMN14677669	Bos_taurus	PRJNA627642	Mammary	Mammary	Holstein	NA	NA	26606961	26528205	0.99704	2637204456	2629782694
SRR11596140	SAMN14677668	Bos_taurus	PRJNA627642	Mammary	Mammary	Holstein	NA	NA	20680060	20591699	0.995727	2043521916	2035064024
SRR11596141	SAMN14677667	Bos_taurus	PRJNA627642	Mammary	Mammary	Holstein	NA	NA	29177846	29069571	0.996289	2889173025	2878738734
SRR11596142	SAMN14677666	Bos_taurus	PRJNA627642	Mammary	Mammary	Holstein	NA	NA	24069559	23964883	0.995651	2380126537	2370058510
SRR11596143	SAMN14677712	Bos_taurus	PRJNA627642	Mammary	Mammary	Holstein	NA	NA	26850698	26739949	0.995875	2659652172	2648976741
SRR11596144	SAMN14677711	Bos_taurus	PRJNA627642	Mammary	Mammary	Holstein	NA	NA	26997724	26769533	0.991548	2671187310	2649056713
SRR11596145	SAMN14677710	Bos_taurus	PRJNA627642	Mammary	Mammary	Holstein	NA	NA	22387191	22221149	0.992583	2215024674	2198908353
SRR11596146	SAMN14677709	Bos_taurus	PRJNA627642	Mammary	Mammary	Holstein	NA	NA	22384904	22202069	0.991832	2215056397	2197283679
SRR11596147	SAMN14677708	Bos_taurus	PRJNA627642	Mammary	Mammary	Holstein	NA	NA	21987969	21909718	0.996441	2175953090	2168408733
SRR11596148	SAMN14677706	Bos_taurus	PRJNA627642	Mammary	Mammary	Holstein	NA	NA	21060473	20890935	0.99195	2083791142	2067364900
SRR11596149	SAMN14677705	Bos_taurus	PRJNA627642	Mammary	Mammary	Holstein	NA	NA	27794227	27576915	0.992181	2750211908	2728996451
SRR11596150	SAMN14677704	Bos_taurus	PRJNA627642	Mammary	Mammary	Holstein	NA	NA	22872290	22778005	0.995878	2262462057	2253396447
SRR11596151	SAMN14677701	Bos_taurus	PRJNA627642	Mammary	Mammary	Holstein	NA	NA	24367738	24295641	0.997041	2414825144	2407918977
SRR11596152	SAMN14677680	Bos_taurus	PRJNA627642	Mammary	Mammary	Holstein	NA	NA	24680464	24532283	0.993996	2442058900	2427782704
SRR11596153	SAMN14677679	Bos_taurus	PRJNA627642	Mammary	Mammary	Holstein	NA	NA	27508126	27396594	0.995945	2723759133	2713060457
SRR11596154	SAMN14677699	Bos_taurus	PRJNA627642	Mammary	Mammary	Holstein	NA	NA	27051264	26899402	0.994386	2678430088	2663828341
SRR11596155	SAMN14677698	Bos_taurus	PRJNA627642	Mammary	Mammary	Holstein	NA	NA	21755603	21632274	0.994331	2152924396	2141065218
SRR11596156	SAMN14677703	Bos_taurus	PRJNA627642	Mammary	Mammary	Holstein	NA	NA	27084891	26976170	0.995986	2680339342	2669995931
SRR11596157	SAMN14677702	Bos_taurus	PRJNA627642	Mammary	Mammary	Holstein	NA	NA	24214365	24174804	0.998366	2398850485	2395174431
SRR11596158	SAMN14677697	Bos_taurus	PRJNA627642	Mammary	Mammary	Holstein	NA	NA	24125260	24012584	0.99533	2386324901	2375615935
SRR11596159	SAMN14677696	Bos_taurus	PRJNA627642	Mammary	Mammary	Holstein	NA	NA	25570420	25523066	0.998148	2531164264	2526705882
SRR11596160	SAMN14677695	Bos_taurus	PRJNA627642	Mammary	Mammary	Holstein	NA	NA	21979366	21856886	0.994428	2174776673	2163023460
SRR11596161	SAMN14677694	Bos_taurus	PRJNA627642	Mammary	Mammary	Holstein	NA	NA	28328859	28255020	0.997394	2806711605	2799721610
SRR11596162	SAMN14677693	Bos_taurus	PRJNA627642	Liver	Liver	Holstein	NA	NA	21894133	21831089	0.997121	2168153734	2162221039
SRR11596163	SAMN14677692	Bos_taurus	PRJNA627642	Liver	Liver	Holstein	NA	NA	18825623	18780491	0.997603	1862421270	1858210279
SRR11596164	SAMN14677691	Bos_taurus	PRJNA627642	Liver	Liver	Holstein	NA	NA	25732152	25640232	0.996428	2549230235	2540511065
SRR11596165	SAMN14677690	Bos_taurus	PRJNA627642	Liver	Liver	Holstein	NA	NA	22616462	22551924	0.997146	2239111143	2233032828
SRR11596166	SAMN14677689	Bos_taurus	PRJNA627642	Liver	Liver	Holstein	NA	NA	21930981	21872076	0.997314	2172674128	2167116641
SRR11596167	SAMN14677688	Bos_taurus	PRJNA627642	Liver	Liver	Holstein	NA	NA	21538522	21478172	0.997198	2132455566	2126742175
SRR11596168	SAMN14677730	Bos_taurus	PRJNA627642	Liver	Liver	Holstein	NA	NA	20272420	20236601	0.998233	2006948248	2003619008
SRR11596169	SAMN14677729	Bos_taurus	PRJNA627642	Liver	Liver	Holstein	NA	NA	21612235	21568108	0.997958	2139877585	2135763296
SRR11596170	SAMN14677728	Bos_taurus	PRJNA627642	Liver	Liver	Holstein	NA	NA	20215158	20145226	0.996541	2001257668	1994572493
SRR11596171	SAMN14677727	Bos_taurus	PRJNA627642	Liver	Liver	Holstein	NA	NA	17733874	17695178	0.997818	1754112426	1750471204
SRR11596172	SAMN14677726	Bos_taurus	PRJNA627642	Liver	Liver	Holstein	NA	NA	24958312	24889277	0.997234	2471079891	2464569680
SRR11596173	SAMN14677725	Bos_taurus	PRJNA627642	Liver	Liver	Holstein	NA	NA	21633604	21583361	0.997678	2142122608	2137429730
SRR11596174	SAMN14677724	Bos_taurus	PRJNA627642	Liver	Liver	Holstein	NA	NA	17653749	17600131	0.996963	1747113182	1742065384
SRR11596175	SAMN14677723	Bos_taurus	PRJNA627642	Liver	Liver	Holstein	NA	NA	22351781	22289988	0.997235	2212911566	2207074238
SRR11596176	SAMN14677722	Bos_taurus	PRJNA627642	Liver	Liver	Holstein	NA	NA	19159440	19112952	0.997574	1897325424	1892922324
SRR11596177	SAMN14677721	Bos_taurus	PRJNA627642	Liver	Liver	Holstein	NA	NA	20670606	20620457	0.997574	2046926849	2042199082
SRR11596178	SAMN14677720	Bos_taurus	PRJNA627642	Liver	Liver	Holstein	NA	NA	20317590	20263973	0.997361	2010785337	2005770632
SRR11596179	SAMN14677719	Bos_taurus	PRJNA627642	Liver	Liver	Holstein	NA	NA	21357993	21299622	0.997267	2112796774	2107252208
SRR11596180	SAMN14677718	Bos_taurus	PRJNA627642	Liver	Liver	Holstein	NA	NA	28304067	28209207	0.996649	2803117769	2794108171
SRR11596181	SAMN14677717	Bos_taurus	PRJNA627642	Liver	Liver	Holstein	NA	NA	19771492	19709170	0.996848	1955475163	1949561712
SRR11596182	SAMN14677716	Bos_taurus	PRJNA627642	Liver	Liver	Holstein	NA	NA	17876707	17815836	0.996595	1768477191	1762658566
SRR11596183	SAMN14677715	Bos_taurus	PRJNA627642	Liver	Liver	Holstein	NA	NA	23895499	23830152	0.997265	2362596649	2356432041
SRR11596184	SAMN14677714	Bos_taurus	PRJNA627642	Liver	Liver	Holstein	NA	NA	24504353	24449453	0.99776	2425127771	2419997469
SRR11596185	SAMN14677713	Bos_taurus	PRJNA627642	Liver	Liver	Holstein	NA	NA	19369191	19326214	0.997781	1915991012	1911949281
SRR11596186	SAMN14677664	Bos_taurus	PRJNA627642	Liver	Liver	Holstein	NA	NA	22461018	22410005	0.997729	2220117609	2215395569
SRR11596187	SAMN14677663	Bos_taurus	PRJNA627642	Liver	Liver	Holstein	NA	NA	19831782	19789342	0.99786	1961016596	1957068903
SRR11596188	SAMN14677662	Bos_taurus	PRJNA627642	Liver	Liver	Holstein	NA	NA	23763423	23714149	0.997926	2353850454	2349225060
SRR11596189	SAMN14677661	Bos_taurus	PRJNA627642	Liver	Liver	Holstein	NA	NA	22476639	22430919	0.997966	2220934875	2216700356
SRR11596190	SAMN14677660	Bos_taurus	PRJNA627642	Liver	Liver	Holstein	NA	NA	24600490	24547033	0.997827	2434304035	2429331097
SRR11596191	SAMN14677659	Bos_taurus	PRJNA627642	Liver	Liver	Holstein	NA	NA	22132143	22085645	0.997899	2189625957	2185248687
SRR11596192	SAMN14677658	Bos_taurus	PRJNA627642	Liver	Liver	Holstein	NA	NA	24641290	24584709	0.997704	2437969575	2432628690
SRR11596193	SAMN14677657	Bos_taurus	PRJNA627642	Liver	Liver	Holstein	NA	NA	19853056	19803690	0.997513	1965296818	1960651454
SRR11802045	SAMN14938363	Bos_taurus	PRJNA633279	Whole_blood	Whole_blood	NA	male	NA	56975885	55620095	0.976204	5562340902	5434677917
SRR11802046	SAMN14938362	Bos_taurus	PRJNA633279	Whole_blood	Whole_blood	NA	male	NA	37587294	36393180	0.968231	3681061029	3571174491
SRR11802047	SAMN14938361	Bos_taurus	PRJNA633279	Whole_blood	Whole_blood	NA	male	NA	47353757	46224493	0.976153	4639858664	4532316123
SRR11802048	SAMN14938412	Bos_taurus	PRJNA633279	Whole_blood	Whole_blood	NA	male	NA	57581854	55870846	0.970286	5638890249	5478810057
SRR11802049	SAMN14938411	Bos_taurus	PRJNA633279	Whole_blood	Whole_blood	NA	male	NA	46693929	45443579	0.973222	4581766637	4463995468
SRR11802050	SAMN14938410	Bos_taurus	PRJNA633279	Whole_blood	Whole_blood	NA	male	NA	64958534	63181066	0.972637	6366190044	6197781239
SRR11802051	SAMN14938409	Bos_taurus	PRJNA633279	Whole_blood	Whole_blood	NA	male	NA	43252962	42014014	0.971356	4239631615	4123104472
SRR11802052	SAMN14938408	Bos_taurus	PRJNA633279	Whole_blood	Whole_blood	NA	male	NA	53118138	51253446	0.964895	5195736340	5029662785
SRR11802053	SAMN14938407	Bos_taurus	PRJNA633279	Whole_blood	Whole_blood	NA	male	NA	79816469	77699363	0.973475	7815944232	7613588024
SRR11802054	SAMN14938406	Bos_taurus	PRJNA633279	Whole_blood	Whole_blood	NA	male	NA	33953347	33064447	0.97382	3329722118	3245292619
SRR11802055	SAMN14938405	Bos_taurus	PRJNA633279	Whole_blood	Whole_blood	NA	male	NA	61050098	59204170	0.969764	5983107718	5806556174
SRR11802056	SAMN14938404	Bos_taurus	PRJNA633279	Whole_blood	Whole_blood	NA	male	NA	46666055	45315253	0.971054	4570581152	4442969648
SRR11802057	SAMN14938403	Bos_taurus	PRJNA633279	Whole_blood	Whole_blood	NA	male	NA	26052803	25281635	0.9704	2552392701	2479024929
SRR11802058	SAMN14938402	Bos_taurus	PRJNA633279	Whole_blood	Whole_blood	NA	male	NA	68646494	67120538	0.977771	6728197494	6584237631
SRR11802059	SAMN14938401	Bos_taurus	PRJNA633279	Whole_blood	Whole_blood	NA	male	NA	44474872	43335530	0.974382	4351680604	4245102466
SRR11802060	SAMN14938400	Bos_taurus	PRJNA633279	Whole_blood	Whole_blood	NA	male	NA	45680679	44441831	0.97288	4469428572	4353522969
SRR11802061	SAMN14938399	Bos_taurus	PRJNA633279	Whole_blood	Whole_blood	NA	male	NA	47692353	46221931	0.969169	4666757715	4528230252
SRR11802062	SAMN14938398	Bos_taurus	PRJNA633279	Whole_blood	Whole_blood	NA	male	NA	48090730	46990112	0.977114	4708446679	4604944017
SRR11802063	SAMN14938397	Bos_taurus	PRJNA633279	Whole_blood	Whole_blood	NA	male	NA	53580172	52184078	0.973944	5245003923	5114627457
SRR11802064	SAMN14938396	Bos_taurus	PRJNA633279	Whole_blood	Whole_blood	NA	male	NA	49723673	48374813	0.972873	4866314344	4739556720
SRR11802065	SAMN14938395	Bos_taurus	PRJNA633279	Whole_blood	Whole_blood	NA	male	NA	62801221	60857761	0.969054	6156764575	5971808424
SRR11802066	SAMN14938394	Bos_taurus	PRJNA633279	Whole_blood	Whole_blood	NA	male	NA	41842793	40849713	0.976266	4062462200	3970706764
SRR11802067	SAMN14938393	Bos_taurus	PRJNA633279	Whole_blood	Whole_blood	NA	male	NA	66567946	64740826	0.972553	6462154983	6297537464
SRR11802068	SAMN14938392	Bos_taurus	PRJNA633279	Whole_blood	Whole_blood	NA	male	NA	66646356	65181760	0.978024	6485990884	6348665300
SRR11802069	SAMN14938391	Bos_taurus	PRJNA633279	Whole_blood	Whole_blood	NA	male	NA	55572315	54251677	0.976236	5399537765	5275116505
SRR11802070	SAMN14938390	Bos_taurus	PRJNA633279	Whole_blood	Whole_blood	NA	male	NA	31463846	30459432	0.968077	3039162563	2945600543
SRR11802071	SAMN14938389	Bos_taurus	PRJNA633279	Whole_blood	Whole_blood	NA	male	NA	66186100	64687272	0.977354	6435702846	6295428389
SRR11802072	SAMN14938388	Bos_taurus	PRJNA633279	Whole_blood	Whole_blood	NA	male	NA	57911114	56515184	0.975895	5622489374	5494766930
SRR11802073	SAMN14938387	Bos_taurus	PRJNA633279	Whole_blood	Whole_blood	NA	male	NA	71485246	69491736	0.972113	6917840929	6733999108
SRR11802074	SAMN14938432	Bos_taurus	PRJNA633279	Whole_blood	Whole_blood	NA	male	NA	40122602	39135304	0.975393	3899303032	3807318497
SRR11802075	SAMN14938431	Bos_taurus	PRJNA633279	Whole_blood	Whole_blood	NA	male	NA	41700646	40310700	0.966668	4032867543	3902868462
SRR11802076	SAMN14938430	Bos_taurus	PRJNA633279	Whole_blood	Whole_blood	NA	male	NA	29177923	28268619	0.968836	2818096620	2732602665
SRR11802077	SAMN14938429	Bos_taurus	PRJNA633279	Whole_blood	Whole_blood	NA	male	NA	62000472	60614826	0.977651	6028787724	5899729261
SRR11802078	SAMN14938428	Bos_taurus	PRJNA633279	Whole_blood	Whole_blood	NA	male	NA	39482954	38309028	0.970268	3822697244	3712369219
SRR11802079	SAMN14938427	Bos_taurus	PRJNA633279	Whole_blood	Whole_blood	NA	male	NA	69774228	67416524	0.96621	6807045532	6599922743
SRR11802080	SAMN14938426	Bos_taurus	PRJNA633279	Whole_blood	Whole_blood	NA	male	NA	52387628	51062968	0.974714	5112680671	4991320608
SRR11802081	SAMN14938425	Bos_taurus	PRJNA633279	Whole_blood	Whole_blood	NA	male	NA	31497026	30582414	0.970962	3045936902	2960496684
SRR11802082	SAMN14938424	Bos_taurus	PRJNA633279	Whole_blood	Whole_blood	NA	male	NA	58086098	56395990	0.970903	5696841901	5540173509
SRR11802083	SAMN14938423	Bos_taurus	PRJNA633279	Whole_blood	Whole_blood	NA	male	NA	46326460	45152932	0.974668	4541972845	4432913660
SRR11802084	SAMN14938422	Bos_taurus	PRJNA633279	Whole_blood	Whole_blood	NA	male	NA	47368097	46292007	0.977282	4655339430	4553930069
SRR11802085	SAMN14938421	Bos_taurus	PRJNA633279	Whole_blood	Whole_blood	NA	male	NA	38747287	37513691	0.968163	3799886436	3685450428
SRR11802086	SAMN14938420	Bos_taurus	PRJNA633279	Whole_blood	Whole_blood	NA	male	NA	38697590	37667024	0.973369	3799615039	3702925756
SRR11802087	SAMN14938419	Bos_taurus	PRJNA633279	Whole_blood	Whole_blood	NA	male	NA	54799615	53520889	0.976665	5384734226	5263228315
SRR11802088	SAMN14938418	Bos_taurus	PRJNA633279	Whole_blood	Whole_blood	NA	male	NA	58608719	57212165	0.976172	5754964894	5622559788
SRR11802089	SAMN14938417	Bos_taurus	PRJNA633279	Whole_blood	Whole_blood	NA	male	NA	50440127	48878747	0.969045	4947137194	4803927008
SRR11802090	SAMN14938416	Bos_taurus	PRJNA633279	Whole_blood	Whole_blood	NA	male	NA	49414872	48244624	0.976318	4839971727	4729015442
SRR11802091	SAMN14938415	Bos_taurus	PRJNA633279	Whole_blood	Whole_blood	NA	male	NA	43510339	42162549	0.969024	4243798126	4120412349
SRR11802092	SAMN14938414	Bos_taurus	PRJNA633279	Whole_blood	Whole_blood	NA	male	NA	56433643	54898509	0.972798	5511672614	5369527392
SRR11802093	SAMN14938413	Bos_taurus	PRJNA633279	Whole_blood	Whole_blood	NA	male	NA	50128173	48922109	0.97594	4895317064	4783170384
SRR11802094	SAMN14938386	Bos_taurus	PRJNA633279	Whole_blood	Whole_blood	NA	male	NA	32847943	31958269	0.972915	3170967111	3088802749
SRR11802095	SAMN14938385	Bos_taurus	PRJNA633279	Whole_blood	Whole_blood	NA	male	NA	58361550	56962214	0.976023	5696447330	5564840829
SRR11802096	SAMN14938384	Bos_taurus	PRJNA633279	Whole_blood	Whole_blood	NA	male	NA	46447510	44936642	0.967471	4525397158	4391832198
SRR11802097	SAMN14938383	Bos_taurus	PRJNA633279	Whole_blood	Whole_blood	NA	male	NA	27507299	26578291	0.966227	2653530696	2566855206
SRR11802098	SAMN14938382	Bos_taurus	PRJNA633279	Whole_blood	Whole_blood	NA	male	NA	69070327	66985703	0.969819	6720856692	6524323488
SRR11802099	SAMN14938381	Bos_taurus	PRJNA633279	Whole_blood	Whole_blood	NA	male	NA	55742521	53819539	0.965502	5447928960	5279288785
SRR11802100	SAMN14938380	Bos_taurus	PRJNA633279	Whole_blood	Whole_blood	NA	male	NA	63435526	61657862	0.971977	6208774166	6047058741
SRR11802101	SAMN14938379	Bos_taurus	PRJNA633279	Whole_blood	Whole_blood	NA	male	NA	73107745	71285973	0.975081	7129348941	6955911105
SRR11802102	SAMN14938378	Bos_taurus	PRJNA633279	Whole_blood	Whole_blood	NA	male	NA	44211450	42733710	0.966576	4330329443	4193302360
SRR11802103	SAMN14938377	Bos_taurus	PRJNA633279	Whole_blood	Whole_blood	NA	male	NA	28306718	27355538	0.966397	2757321231	2668943731
SRR11802104	SAMN14938376	Bos_taurus	PRJNA633279	Whole_blood	Whole_blood	NA	male	NA	56586408	55244854	0.976292	5520666350	5395496323
SRR11802105	SAMN14938375	Bos_taurus	PRJNA633279	Whole_blood	Whole_blood	NA	male	NA	53477466	51561108	0.964165	5229920315	5059698940
SRR11802106	SAMN14938374	Bos_taurus	PRJNA633279	Whole_blood	Whole_blood	NA	male	NA	53098016	51864794	0.976775	5214982196	5097861318
SRR11802107	SAMN14938373	Bos_taurus	PRJNA633279	Whole_blood	Whole_blood	NA	male	NA	54919977	53586801	0.975725	5384891588	5259577337
SRR11802108	SAMN14938372	Bos_taurus	PRJNA633279	Whole_blood	Whole_blood	NA	male	NA	52092706	50379990	0.967122	5101585815	4941534057
SRR11802109	SAMN14938371	Bos_taurus	PRJNA633279	Whole_blood	Whole_blood	NA	male	NA	50536741	49069959	0.970976	4953037636	4815600634
SRR11802110	SAMN14938370	Bos_taurus	PRJNA633279	Whole_blood	Whole_blood	NA	male	NA	37417884	36293280	0.969945	3669135043	3563310808
SRR11802111	SAMN14938369	Bos_taurus	PRJNA633279	Whole_blood	Whole_blood	NA	male	NA	52905356	51447934	0.972452	5191928046	5055173978
SRR11802112	SAMN14938368	Bos_taurus	PRJNA633279	Whole_blood	Whole_blood	NA	male	NA	47288626	45486252	0.961886	4634722420	4465262219
SRR11802113	SAMN14938367	Bos_taurus	PRJNA633279	Whole_blood	Whole_blood	NA	male	NA	58720631	57207465	0.974231	5761769486	5617795931
SRR11802114	SAMN14938366	Bos_taurus	PRJNA633279	Whole_blood	Whole_blood	NA	male	NA	45594260	44402602	0.973864	4450994134	4341182934
SRR11802115	SAMN14938365	Bos_taurus	PRJNA633279	Whole_blood	Whole_blood	NA	male	NA	47554129	46231375	0.972184	4639916198	4519319350
SRR11802116	SAMN14938364	Bos_taurus	PRJNA633279	Whole_blood	Whole_blood	NA	male	NA	51095186	49615726	0.971045	4984587803	4848937048
SRR12010345	SAMN15233422	Bos_taurus	PRJNA639363	Whole_blood	Whole_blood	Holstein	female	3.8_yr	47986076	44688068	0.931272	6938351712	6496372150
SRR12010346	SAMN15233421	Bos_taurus	PRJNA639363	Whole_blood	Whole_blood	Holstein	female	3.8_yr	42702179	39511801	0.925288	6170546639	5740134215
SRR12010347	SAMN15233420	Bos_taurus	PRJNA639363	Whole_blood	Whole_blood	Holstein	female	3.8_y	46002387	43141785	0.937816	6653077185	6265048031
SRR12010348	SAMN15233419	Bos_taurus	PRJNA639363	Whole_blood	Whole_blood	Holstein	female	1.9_yr	44699660	40944728	0.915996	6463735439	5957454265
SRR12010349	SAMN15233418	Bos_taurus	PRJNA639363	Whole_blood	Whole_blood	Holstein	female	1.9_yr	44723684	41239824	0.922103	6467899540	5992258878
SRR12010350	SAMN15233453	Bos_taurus	PRJNA639363	Whole_blood	Whole_blood	Holstein	female	2.9_yr	47351661	44236737	0.934217	6821439797	6406184738
SRR12010351	SAMN15233417	Bos_taurus	PRJNA639363	Whole_blood	Whole_blood	Holstein	female	1.8_yr	49771891	45743809	0.919069	7208957294	6658746036
SRR12010352	SAMN15233452	Bos_taurus	PRJNA639363	Whole_blood	Whole_blood	Holstein	female	2.9_yr	41737356	38673238	0.926586	6037849121	5626264046
SRR12010353	SAMN15233451	Bos_taurus	PRJNA639363	Whole_blood	Whole_blood	Holstein	female	2.8_yr	47706857	44357615	0.929795	6873393073	6424040039
SRR12010354	SAMN15233450	Bos_taurus	PRJNA639363	Whole_blood	Whole_blood	Holstein	female	2.8_yr	48457291	44921279	0.927028	6992992033	6525899426
SRR12010355	SAMN15233449	Bos_taurus	PRJNA639363	Whole_blood	Whole_blood	Holstein	female	2.8_yr	46028772	42045802	0.913468	6654329675	6107378500
SRR12010356	SAMN15233448	Bos_taurus	PRJNA639363	Whole_blood	Whole_blood	Holstein	female	2.8_yr	43987996	41122336	0.934854	6363440323	5981675192
SRR12010357	SAMN15233447	Bos_taurus	PRJNA639363	Whole_blood	Whole_blood	Holstein	female	2.9_yr	49761464	45485698	0.914075	7188987469	6612552772
SRR12010358	SAMN15233446	Bos_taurus	PRJNA639363	Whole_blood	Whole_blood	Holstein	female	2.9_yr	47576894	44958436	0.944964	6880980618	6530260143
SRR12010359	SAMN15233445	Bos_taurus	PRJNA639363	Whole_blood	Whole_blood	Holstein	female	1.9_yr	45739910	42907972	0.938086	6589997528	6212012026
SRR12010360	SAMN15233444	Bos_taurus	PRJNA639363	Whole_blood	Whole_blood	Holstein	female	1.9_yr	44970190	42352470	0.94179	6509532713	6154324033
SRR12010361	SAMN15233443	Bos_taurus	PRJNA639363	Whole_blood	Whole_blood	Holstein	female	1.9_yr	50156119	45767487	0.912501	7236507171	6643445001
SRR12010362	SAMN15233416	Bos_taurus	PRJNA639363	Whole_blood	Whole_blood	Holstein	female	1.8_yr	42849905	39905753	0.931292	6208751696	5808316521
SRR12010363	SAMN15233442	Bos_taurus	PRJNA639363	Whole_blood	Whole_blood	Holstein	female	1.9_yr	51020927	46593799	0.913229	7379975913	6782520407
SRR12010364	SAMN15233441	Bos_taurus	PRJNA639363	Whole_blood	Whole_blood	Holstein	female	2.7_yr	47053219	44026083	0.935666	6782190844	6379331404
SRR12010365	SAMN15233440	Bos_taurus	PRJNA639363	Whole_blood	Whole_blood	Holstein	female	2.7_yr	49037648	45386784	0.92555	7104897244	6611486497
SRR12010366	SAMN15233439	Bos_taurus	PRJNA639363	Whole_blood	Whole_blood	Holstein	female	3.7_yr	46159105	43108843	0.933919	6675345242	6272449467
SRR12010367	SAMN15233438	Bos_taurus	PRJNA639363	Whole_blood	Whole_blood	Holstein	female	3.7_yr	51897747	48889247	0.94203	7545454952	7132247616
SRR12010368	SAMN15233437	Bos_taurus	PRJNA639363	Whole_blood	Whole_blood	Holstein	female	2.7_yr	43518665	39854595	0.915805	6295647969	5797857489
SRR12010369	SAMN15233436	Bos_taurus	PRJNA639363	Whole_blood	Whole_blood	Holstein	female	2.7_yr	47215161	44281915	0.937875	6831776334	6437593493
SRR12010370	SAMN15233435	Bos_taurus	PRJNA639363	Whole_blood	Whole_blood	Holstein	female	2.8_yr	42286155	37656775	0.890523	6100995588	5478658232
SRR12010371	SAMN15233434	Bos_taurus	PRJNA639363	Whole_blood	Whole_blood	Holstein	female	2.8_yr	48997921	45790159	0.934533	7099847014	6666711618
SRR12010372	SAMN15233433	Bos_taurus	PRJNA639363	Whole_blood	Whole_blood	Holstein	female	3.9_yr	53585451	49940503	0.931979	7734923865	7254264820
SRR12010373	SAMN15233415	Bos_taurus	PRJNA639363	Whole_blood	Whole_blood	Holstein	female	4.2_yr	43975243	40090529	0.911661	6361114245	5836651897
SRR12010374	SAMN15233432	Bos_taurus	PRJNA639363	Whole_blood	Whole_blood	Holstein	female	3.9_yr	48442017	44734719	0.923469	7017223929	6514895904
SRR12010375	SAMN15233431	Bos_taurus	PRJNA639363	Whole_blood	Whole_blood	Holstein	female	2.1_yr	47493977	43409797	0.914006	6855109205	6315151940
SRR12010376	SAMN15233430	Bos_taurus	PRJNA639363	Whole_blood	Whole_blood	Holstein	female	2.1_yr	47422322	44255316	0.933217	6887609953	6459170654
SRR12010377	SAMN15233429	Bos_taurus	PRJNA639363	Whole_blood	Whole_blood	Holstein	female	2.8_yr	45602457	41304949	0.905761	6602689324	6012106828
SRR12010378	SAMN15233428	Bos_taurus	PRJNA639363	Whole_blood	Whole_blood	Holstein	female	2.8_yr	42343634	39309974	0.928356	6086214107	5687681802
SRR12010379	SAMN15233427	Bos_taurus	PRJNA639363	Whole_blood	Whole_blood	Holstein	female	2.9_yr	41861764	38796932	0.926787	6059625435	5639114420
SRR12010380	SAMN15233426	Bos_taurus	PRJNA639363	Whole_blood	Whole_blood	Holstein	female	2.9_yr	43034418	40027192	0.93012	6212483044	5814683165
SRR12010381	SAMN15233425	Bos_taurus	PRJNA639363	Whole_blood	Whole_blood	Holstein	female	2.9_yr	44333373	40750377	0.919181	6390469711	5906449337
SRR12010382	SAMN15233424	Bos_taurus	PRJNA639363	Whole_blood	Whole_blood	Holstein	female	2.9_yr	50146505	46420313	0.925694	7253085431	6752482531
SRR12010383	SAMN15233423	Bos_taurus	PRJNA639363	Whole_blood	Whole_blood	Holstein	female	3.8_yr	43244565	39686621	0.917725	6263982125	5783263190
SRR12010384	SAMN15233414	Bos_taurus	PRJNA639363	Whole_blood	Whole_blood	Holstein	female	4.2_yr	43718377	40853711	0.934475	6331001976	5950549599
SRR12010385	SAMN15233413	Bos_taurus	PRJNA639363	Whole_blood	Whole_blood	Holstein	female	4.2_yr	46861532	43198648	0.921836	6741570323	6254594519
SRR12108691	SAMN15399272	Bos_taurus	PRJNA642849	Hypothalamus	Hypothalamus	Holstein_X_Angus	NA	NA	52941084	48414062	0.914489	7918870335	7245955590
SRR12108692	SAMN15399271	Bos_taurus	PRJNA642849	Hypothalamus	Hypothalamus	Holstein_X_Angus	NA	NA	50743463	47065725	0.927523	7593036787	7046471232
SRR12108693	SAMN15399270	Bos_taurus	PRJNA642849	Hypothalamus	Hypothalamus	Holstein_X_Angus	NA	NA	57804700	52846648	0.914228	8657724815	7919192116
SRR12108694	SAMN15399269	Bos_taurus	PRJNA642849	Hypothalamus	Hypothalamus	Holstein_X_Angus	NA	NA	43915205	39881017	0.908137	6570854731	5970428366
SRR12108695	SAMN15399268	Bos_taurus	PRJNA642849	Hypothalamus	Hypothalamus	Holstein_X_Angus	NA	NA	43465696	39128918	0.900225	6509013988	5863097440
SRR12108696	SAMN15399267	Bos_taurus	PRJNA642849	Hypothalamus	Hypothalamus	Holstein_X_Angus	NA	NA	40130157	36236661	0.902978	6011367522	5430197425
SRR12108697	SAMN15399266	Bos_taurus	PRJNA642849	Hypothalamus	Hypothalamus	Holstein_X_Angus	NA	NA	42410453	38409213	0.905654	6348675716	5754021243
SRR12108698	SAMN15399265	Bos_taurus	PRJNA642849	Hypothalamus	Hypothalamus	Holstein_X_Angus	NA	NA	49994536	44210188	0.8843	7487555930	6625060626
SRR12108699	SAMN15399264	Bos_taurus	PRJNA642849	Hypothalamus	Hypothalamus	Holstein_X_Angus	NA	NA	47577463	41578463	0.873911	7126380165	6234497150
SRR12108700	SAMN15399263	Bos_taurus	PRJNA642849	Hypothalamus	Hypothalamus	Holstein_X_Angus	NA	NA	43913393	39380231	0.89677	6572328618	5896886147
SRR12108701	SAMN15399262	Bos_taurus	PRJNA642849	Hypothalamus	Hypothalamus	Holstein_X_Angus	NA	NA	43964765	35801125	0.814314	6577383249	5361714423
SRR12108702	SAMN15399261	Bos_taurus	PRJNA642849	Hypothalamus	Hypothalamus	Holstein_X_Angus	NA	NA	45288230	41150002	0.908625	6780572078	6164155057
SRR12108703	SAMN15399260	Bos_taurus	PRJNA642849	Hypothalamus	Hypothalamus	Holstein_X_Angus	NA	NA	45958306	42105586	0.916169	6881003144	6306825663
SRR12108704	SAMN15399259	Bos_taurus	PRJNA642849	Hypothalamus	Hypothalamus	Holstein_X_Angus	NA	NA	51205956	45460370	0.887795	7667606099	6811094814
SRR12108705	SAMN15399258	Bos_taurus	PRJNA642849	Hypothalamus	Hypothalamus	Holstein_X_Angus	NA	NA	46249762	40967870	0.885796	6924461437	6137969980
SRR12108706	SAMN15399257	Bos_taurus	PRJNA642849	Hypothalamus	Hypothalamus	Holstein_X_Angus	NA	NA	43585475	38965197	0.893995	6528649742	5840038587
SRR12108707	SAMN15399256	Bos_taurus	PRJNA642849	Hypothalamus	Hypothalamus	Holstein_X_Angus	NA	NA	49578091	44154849	0.890612	7424113542	6615669674
SRR12108708	SAMN15399255	Bos_taurus	PRJNA642849	Hypothalamus	Hypothalamus	Holstein_X_Angus	NA	NA	42139166	37709318	0.894876	6311256367	5649240372
SRR12108709	SAMN15399254	Bos_taurus	PRJNA642849	Hypothalamus	Hypothalamus	Holstein_X_Angus	NA	NA	48960258	43919102	0.897036	7329741863	6579814735
SRR12108710	SAMN15399253	Bos_taurus	PRJNA642849	Hypothalamus	Hypothalamus	Holstein_X_Angus	NA	NA	55474559	48018153	0.865589	8305325819	7195295085
SRR12108711	SAMN15399252	Bos_taurus	PRJNA642849	Hypothalamus	Hypothalamus	Holstein_X_Angus	NA	NA	52195608	47723134	0.914313	7804488514	7139917993
SRR12108712	SAMN15399251	Bos_taurus	PRJNA642849	Hypothalamus	Hypothalamus	Holstein_X_Angus	NA	NA	46956185	41536979	0.88459	7027211751	6220548385
SRR12108713	SAMN15399250	Bos_taurus	PRJNA642849	Hypothalamus	Hypothalamus	Holstein_X_Angus	NA	NA	49540003	44098677	0.890163	7416592131	6605639931
SRR12108714	SAMN15399249	Bos_taurus	PRJNA642849	Hypothalamus	Hypothalamus	Holstein_X_Angus	NA	NA	44102424	39923844	0.905253	6592979963	5971422873
SRR12108715	SAMN15399248	Bos_taurus	PRJNA642849	Hypothalamus	Hypothalamus	Holstein_X_Angus	NA	NA	46275218	34780270	0.751596	6915671337	5214974302
SRR12108716	SAMN15399247	Bos_taurus	PRJNA642849	Hypothalamus	Hypothalamus	Holstein_X_Angus	NA	NA	43825890	39549410	0.902421	6561944408	5925463990
SRR12108717	SAMN15399246	Bos_taurus	PRJNA642849	Hypothalamus	Hypothalamus	Holstein_X_Angus	NA	NA	48153139	44469235	0.923496	7215619888	6665141652
SRR12108718	SAMN15399274	Bos_taurus	PRJNA642849	Hypothalamus	Hypothalamus	Holstein_X_Angus	NA	NA	50229329	45804075	0.911899	7520276968	6861558990
SRR12108719	SAMN15399273	Bos_taurus	PRJNA642849	Hypothalamus	Hypothalamus	Holstein_X_Angus	NA	NA	51626302	46748110	0.90551	7724800954	6998533550
SRR12108866	SAMN15399434	Bos_taurus	PRJNA642856	Arcuate_nucleus	Hypothalamus	Holstein_X_Angus	NA	NA	50531853	46274069	0.915741	7565465339	6932643373
SRR12108867	SAMN15399475	Bos_taurus	PRJNA642856	Arcuate_nucleus	Hypothalamus	Holstein_X_Angus	NA	NA	53082017	45070145	0.849066	7949458837	6756301874
SRR12108868	SAMN15399474	Bos_taurus	PRJNA642856	Arcuate_nucleus	Hypothalamus	Holstein_X_Angus	NA	NA	54634217	49798133	0.911483	8181935798	7461148655
SRR12108869	SAMN15399473	Bos_taurus	PRJNA642856	Arcuate_nucleus	Hypothalamus	Holstein_X_Angus	NA	NA	53848109	49134667	0.912468	8058198241	7357521167
SRR12108870	SAMN15399472	Bos_taurus	PRJNA642856	Arcuate_nucleus	Hypothalamus	Holstein_X_Angus	NA	NA	44831249	41381553	0.923052	6710624345	6198684661
SRR12108871	SAMN15399471	Bos_taurus	PRJNA642856	Arcuate_nucleus	Hypothalamus	Holstein_X_Angus	NA	NA	55456841	50646063	0.913252	8309245689	7592520537
SRR12108872	SAMN15399470	Bos_taurus	PRJNA642856	Arcuate_nucleus	Hypothalamus	Holstein_X_Angus	NA	NA	44321725	40876449	0.922267	6641056457	6127102849
SRR12108873	SAMN15399469	Bos_taurus	PRJNA642856	Arcuate_nucleus	Hypothalamus	Holstein_X_Angus	NA	NA	56783816	52834806	0.930455	8500703404	7913875316
SRR12108874	SAMN15399468	Bos_taurus	PRJNA642856	Arcuate_nucleus	Hypothalamus	Holstein_X_Angus	NA	NA	68808993	64193287	0.93292	10299337395	9613633434
SRR12108875	SAMN15399466	Bos_taurus	PRJNA642856	Arcuate_nucleus	Hypothalamus	Holstein_X_Angus	NA	NA	57121383	52857289	0.92535	8551110413	7917875057
SRR12108876	SAMN15399465	Bos_taurus	PRJNA642856	Arcuate_nucleus	Hypothalamus	Holstein_X_Angus	NA	NA	49433902	45926840	0.929056	7402917695	6880787083
SRR12108877	SAMN15399464	Bos_taurus	PRJNA642856	Arcuate_nucleus	Hypothalamus	Holstein_X_Angus	NA	NA	57052233	51334277	0.899777	8540396113	7689845303
SRR12108878	SAMN15399463	Bos_taurus	PRJNA642856	Arcuate_nucleus	Hypothalamus	Holstein_X_Angus	NA	NA	45237642	41280588	0.912527	6775387281	6186241401
SRR12108879	SAMN15399462	Bos_taurus	PRJNA642856	Arcuate_nucleus	Hypothalamus	Holstein_X_Angus	NA	NA	56150129	51790627	0.92236	8410860573	7761333611
SRR12108880	SAMN15399461	Bos_taurus	PRJNA642856	Arcuate_nucleus	Hypothalamus	Holstein_X_Angus	NA	NA	44580761	41125283	0.922489	6674910435	6159563052
SRR12108881	SAMN15399460	Bos_taurus	PRJNA642856	Arcuate_nucleus	Hypothalamus	Holstein_X_Angus	NA	NA	49017695	44747785	0.91289	7348163723	6710363836
SRR12108882	SAMN15399459	Bos_taurus	PRJNA642856	Arcuate_nucleus	Hypothalamus	Holstein_X_Angus	NA	NA	51983871	46393735	0.892464	7781144274	6948368078
SRR12108883	SAMN15399458	Bos_taurus	PRJNA642856	Arcuate_nucleus	Hypothalamus	Holstein_X_Angus	NA	NA	45321699	40657585	0.897089	6785708385	6090686146
SRR12108884	SAMN15399457	Bos_taurus	PRJNA642856	Arcuate_nucleus	Hypothalamus	Holstein_X_Angus	NA	NA	55150860	49641706	0.900108	8254634078	7433258316
SRR12108885	SAMN15399456	Bos_taurus	PRJNA642856	Arcuate_nucleus	Hypothalamus	Holstein_X_Angus	NA	NA	43371765	39935857	0.92078	6499089977	5985555365
SRR12108886	SAMN15399455	Bos_taurus	PRJNA642856	Arcuate_nucleus	Hypothalamus	Holstein_X_Angus	NA	NA	46442453	41138215	0.885789	6952835507	6164606115
SRR12108887	SAMN15399498	Bos_taurus	PRJNA642856	Arcuate_nucleus	Hypothalamus	Holstein_X_Angus	NA	NA	53444882	47996856	0.898063	8006643119	7193995394
SRR12108888	SAMN15399497	Bos_taurus	PRJNA642856	Arcuate_nucleus	Hypothalamus	Holstein_X_Angus	NA	NA	42116259	37909667	0.90012	6308867259	5681551897
SRR12108889	SAMN15399496	Bos_taurus	PRJNA642856	Arcuate_nucleus	Hypothalamus	Holstein_X_Angus	NA	NA	45459305	40194699	0.884191	6802303195	6022396470
SRR12108890	SAMN15399495	Bos_taurus	PRJNA642856	Arcuate_nucleus	Hypothalamus	Holstein_X_Angus	NA	NA	49582591	43845869	0.8843	7425623788	6571283141
SRR12108891	SAMN15399494	Bos_taurus	PRJNA642856	Arcuate_nucleus	Hypothalamus	Holstein_X_Angus	NA	NA	48496108	44375398	0.91503	7263705639	6649845448
SRR12108892	SAMN15399493	Bos_taurus	PRJNA642856	Arcuate_nucleus	Hypothalamus	Holstein_X_Angus	NA	NA	50346135	45202505	0.897835	7540252682	6773489186
SRR12108893	SAMN15399492	Bos_taurus	PRJNA642856	Arcuate_nucleus	Hypothalamus	Holstein_X_Angus	NA	NA	46124968	41361598	0.896729	6908840624	6199243027
SRR12108894	SAMN15399491	Bos_taurus	PRJNA642856	Arcuate_nucleus	Hypothalamus	Holstein_X_Angus	NA	NA	38674885	34918411	0.90287	5792299273	5233408313
SRR12353959	SAMN15678455	Bos_taurus	PRJNA627332	Fetus	Fetus	Holstein	NA	not_applicable	35961454	35829993	0.996344	1796578923	1790055843
SRR12353960	SAMN15678454	Bos_taurus	PRJNA627332	Fetus	Fetus	Holstein	NA	not_applicable	20172759	20064201	0.994619	1007420586	1002028223
SRR12353961	SAMN15678453	Bos_taurus	PRJNA627332	Fetus	Fetus	Holstein	NA	not_applicable	33700025	33568334	0.996092	1683567971	1677030232
SRR12353962	SAMN15678452	Bos_taurus	PRJNA627332	Fetus	Fetus	Holstein	NA	not_applicable	38311654	38149737	0.995774	1913567737	1905531393
SRR12353963	SAMN15678451	Bos_taurus	PRJNA627332	Fetus	Fetus	Holstein	NA	not_applicable	30119355	29987850	0.995634	1504765604	1498231841
SRR12353964	SAMN15678450	Bos_taurus	PRJNA627332	Fetus	Fetus	Holstein	NA	not_applicable	24568972	24467847	0.995884	1226881215	1221867453
SRR12353965	SAMN15678449	Bos_taurus	PRJNA627332	Fetus	Fetus	Holstein	NA	not_applicable	31059977	30902983	0.994945	1551337408	1543540048
SRR12353966	SAMN15678448	Bos_taurus	PRJNA627332	Fetus	Fetus	Holstein	NA	not_applicable	25963994	25848626	0.995557	1296613652	1290889025
SRR12353967	SAMN15678457	Bos_taurus	PRJNA627332	Fetus	Fetus	Holstein	NA	not_applicable	39991555	39831153	0.995989	1997009029	1989059411
SRR12353968	SAMN15678456	Bos_taurus	PRJNA627332	Fetus	Fetus	Holstein	NA	not_applicable	33291188	32977985	0.990592	1662857590	1647269792
SRR12353969	SAMN15678447	Bos_taurus	PRJNA627332	Fetus	Fetus	Holstein	NA	not_applicable	18454565	18383226	0.996134	921968386	918427534
SRR12353970	SAMN15678446	Bos_taurus	PRJNA627332	Fetus	Fetus	Holstein	NA	not_applicable	33360922	33211759	0.995529	1666319881	1658916546
SRR12638567	SAMN16130168	Bos_taurus	PRJNA663348	Lavage	Lung	Holstein	male	6_weeks	2540008	2016603	0.793936	248099716	198502966
SRR12638568	SAMN16130164	Bos_taurus	PRJNA663348	Lavage	Lung	Holstein	male	6_weeks	2746825	1901298	0.69218	268042474	186383099
SRR12638569	SAMN16130160	Bos_taurus	PRJNA663348	Lavage	Lung	Holstein	male	6_weeks	2686776	2128377	0.792168	263686498	210201808
SRR12638570	SAMN16130156	Bos_taurus	PRJNA663348	Lavage	Lung	Holstein	male	6_weeks	2976207	2201756	0.739786	291427263	217108097
SRR12638571	SAMN16130233	Bos_taurus	PRJNA663348	Whole_blood	Whole_blood	Holstein	male	6_weeks	9122187	7008648	0.768308	888671944	691531618
SRR12638572	SAMN16130536	Bos_taurus	PRJNA663348	Whole_blood	Whole_blood	Holstein	male	6_weeks	1951229	1411684	0.723485	187749806	138202260
SRR12638573	SAMN16130532	Bos_taurus	PRJNA663348	Whole_blood	Whole_blood	Holstein	male	6_weeks	2517692	2205152	0.875862	246099442	217040876
SRR12638574	SAMN16130528	Bos_taurus	PRJNA663348	Whole_blood	Whole_blood	Holstein	male	6_weeks	2608560	2295170	0.879861	255707085	226443663
SRR12638575	SAMN16130524	Bos_taurus	PRJNA663348	Whole_blood	Whole_blood	Holstein	male	6_weeks	2546219	2219878	0.871833	249583827	219025992
SRR12638576	SAMN16130298	Bos_taurus	PRJNA663348	Mediastinal_lymph_node	Lymph	Holstein	male	6_weeks	4183202	3538131	0.845795	407958199	348192209
SRR12638577	SAMN16130520	Bos_taurus	PRJNA663348	Whole_blood	Whole_blood	Holstein	male	6_weeks	2259124	2031656	0.899311	219256084	198482211
SRR12638578	SAMN16130516	Bos_taurus	PRJNA663348	Whole_blood	Whole_blood	Holstein	male	6_weeks	2510424	2220907	0.884674	245884314	218995869
SRR12638579	SAMN16130512	Bos_taurus	PRJNA663348	Whole_blood	Whole_blood	Holstein	male	6_weeks	2196433	1879883	0.85588	215111145	185425536
SRR12638580	SAMN16130508	Bos_taurus	PRJNA663348	Whole_blood	Whole_blood	Holstein	male	6_weeks	2438951	2179130	0.89347	239496371	215188866
SRR12638581	SAMN16130504	Bos_taurus	PRJNA663348	Whole_blood	Whole_blood	Holstein	male	6_weeks	1887899	1287690	0.682076	180791036	125359397
SRR12638582	SAMN16130500	Bos_taurus	PRJNA663348	Whole_blood	Whole_blood	Holstein	male	6_weeks	2265056	1943994	0.858254	221920330	191942305
SRR12638583	SAMN16130496	Bos_taurus	PRJNA663348	Whole_blood	Whole_blood	Holstein	male	6_weeks	2541617	2178711	0.857215	249787519	215646251
SRR12638584	SAMN16130492	Bos_taurus	PRJNA663348	Whole_blood	Whole_blood	Holstein	male	6_weeks	2888456	2517820	0.871684	280472192	246472514
SRR12638585	SAMN16130488	Bos_taurus	PRJNA663348	Whole_blood	Whole_blood	Holstein	male	6_weeks	2463857	2228335	0.904409	242501545	220525949
SRR12638586	SAMN16130484	Bos_taurus	PRJNA663348	Whole_blood	Whole_blood	Holstein	male	6_weeks	2920563	2452397	0.8397	285883823	242097323
SRR12638587	SAMN16130294	Bos_taurus	PRJNA663348	Lavage	Lung	Holstein	male	6_weeks	2540134	1922210	0.756736	249166778	189660195
SRR12638588	SAMN16130480	Bos_taurus	PRJNA663348	Whole_blood	Whole_blood	Holstein	male	6_weeks	2555698	2248092	0.879639	249700355	221251569
SRR12638589	SAMN16130476	Bos_taurus	PRJNA663348	Lung_Lession	Lung	Holstein	male	6_weeks	2570471	2269663	0.882976	251780046	223882661
SRR12638590	SAMN16130472	Bos_taurus	PRJNA663348	Lung_Lession	Lung	Holstein	male	6_weeks	2923438	2174508	0.743819	283086798	213424753
SRR12638591	SAMN16130468	Bos_taurus	PRJNA663348	Lung_Lession	Lung	Holstein	male	6_weeks	2625041	2258602	0.860406	257363704	223155593
SRR12638592	SAMN16130464	Bos_taurus	PRJNA663348	Lung_Lession	Lung	Holstein	male	6_weeks	4213320	3778827	0.896876	410843617	371039115
SRR12638593	SAMN16130460	Bos_taurus	PRJNA663348	Lung_Lession	Lung	Holstein	male	6_weeks	2713409	2386034	0.879349	265726668	235301072
SRR12638594	SAMN16130456	Bos_taurus	PRJNA663348	Lung_Lession	Lung	Holstein	male	6_weeks	3021771	2672497	0.884414	297349847	264620209
SRR12638595	SAMN16130452	Bos_taurus	PRJNA663348	Lung_Lession	Lung	Holstein	male	6_weeks	2961741	2637245	0.890437	292007736	261545311
SRR12638596	SAMN16130448	Bos_taurus	PRJNA663348	Lung_Lession	Lung	Holstein	male	6_weeks	2866940	2544535	0.887544	280827775	250830663
SRR12638597	SAMN16130444	Bos_taurus	PRJNA663348	Lung_Lession	Lung	Holstein	male	6_weeks	2488097	2218113	0.89149	242619137	217771201
SRR12638598	SAMN16130290	Bos_taurus	PRJNA663348	Lavage	Lung	Holstein	male	6_weeks	2375988	1929350	0.81202	232296833	190123419
SRR12638599	SAMN16130440	Bos_taurus	PRJNA663348	Lung_Lession	Lung	Holstein	male	6_weeks	3157611	2623169	0.830745	307986069	258101187
SRR12638600	SAMN16130436	Bos_taurus	PRJNA663348	Lung_Lession	Lung	Holstein	male	6_weeks	2562176	2260267	0.882167	251739556	223508321
SRR12638602	SAMN16130269	Bos_taurus	PRJNA663348	Whole_blood	Whole_blood	Holstein	male	6_weeks	8463866	6666450	0.787637	828921074	660116707
SRR12638603	SAMN16130265	Bos_taurus	PRJNA663348	Whole_blood	Whole_blood	Holstein	male	6_weeks	9585506	6933749	0.723358	930479859	682949328
SRR12638604	SAMN16130261	Bos_taurus	PRJNA663348	Whole_blood	Whole_blood	Holstein	male	6_weeks	9246751	6907023	0.746968	898854973	680934647
SRR12638605	SAMN16130432	Bos_taurus	PRJNA663348	Lung_Lession	Lung	Holstein	male	6_weeks	2920753	2624117	0.898439	286176784	258650531
SRR12638606	SAMN16130257	Bos_taurus	PRJNA663348	Whole_blood	Whole_blood	Holstein	male	6_weeks	8510873	6267733	0.736438	827364003	618335244
SRR12638607	SAMN16130253	Bos_taurus	PRJNA663348	Whole_blood	Whole_blood	Holstein	male	6_weeks	9609344	7533617	0.783989	938679653	744317040
SRR12638608	SAMN16130249	Bos_taurus	PRJNA663348	Whole_blood	Whole_blood	Holstein	male	6_weeks	9534584	6978078	0.73187	922545963	685110032
SRR12638609	SAMN16130245	Bos_taurus	PRJNA663348	Whole_blood	Whole_blood	Holstein	male	6_weeks	8555244	5157623	0.602861	807037901	499916405
SRR12638610	SAMN16130241	Bos_taurus	PRJNA663348	Whole_blood	Whole_blood	Holstein	male	6_weeks	10144244	7820978	0.770977	992440553	774048756
SRR12638611	SAMN16130237	Bos_taurus	PRJNA663348	Whole_blood	Whole_blood	Holstein	male	6_weeks	9731407	7457076	0.76629	949356256	736664696
SRR12638612	SAMN16130231	Bos_taurus	PRJNA663348	Whole_blood	Whole_blood	Holstein	male	6_weeks	8714603	6731283	0.772414	848904562	663106401
SRR12638613	SAMN16130227	Bos_taurus	PRJNA663348	Whole_blood	Whole_blood	Holstein	male	6_weeks	7767181	5005377	0.644426	750641376	489964276
SRR12638614	SAMN16130223	Bos_taurus	PRJNA663348	Whole_blood	Whole_blood	Holstein	male	6_weeks	10650873	7851168	0.737138	1037052959	773967730
SRR12638615	SAMN16130428	Bos_taurus	PRJNA663348	Lavage	Lung	Holstein	male	6_weeks	3388605	2777417	0.819634	330323451	273209738
SRR12638616	SAMN16130219	Bos_taurus	PRJNA663348	Lung_nonlesiononal	Lung	Holstein	male	6_weeks	9033335	6814559	0.754379	882726861	673745083
SRR12638617	SAMN16130215	Bos_taurus	PRJNA663348	Lung_nonlesiononal	Lung	Holstein	male	6_weeks	9321930	7263401	0.779174	911550650	717499822
SRR12638618	SAMN16130211	Bos_taurus	PRJNA663348	Lung_nonlesiononal	Lung	Holstein	male	6_weeks	9151856	6836652	0.747024	890846842	675102379
SRR12638619	SAMN16130207	Bos_taurus	PRJNA663348	Lung_nonlesiononal	Lung	Holstein	male	6_weeks	7168984	5527160	0.770982	697465552	544016855
SRR12638620	SAMN16130203	Bos_taurus	PRJNA663348	Lung_nonlesiononal	Lung	Holstein	male	6_weeks	9082171	6996202	0.770323	885700719	690742474
SRR12638621	SAMN16130199	Bos_taurus	PRJNA663348	Lung_nonlesiononal	Lung	Holstein	male	6_weeks	10261685	7473525	0.728294	994706171	735745304
SRR12638622	SAMN16130195	Bos_taurus	PRJNA663348	Lung_nonlesiononal	Lung	Holstein	male	6_weeks	8540060	6584485	0.771012	833296515	650243600
SRR12638623	SAMN16130191	Bos_taurus	PRJNA663348	Lung_nonlesiononal	Lung	Holstein	male	6_weeks	9294423	7126862	0.766789	907666388	704663422
SRR12638624	SAMN16130187	Bos_taurus	PRJNA663348	Lung_nonlesiononal	Lung	Holstein	male	6_weeks	7023869	5227281	0.744217	683701489	516505156
SRR12638625	SAMN16130183	Bos_taurus	PRJNA663348	Lung_nonlesiononal	Lung	Holstein	male	6_weeks	7961297	6218572	0.7811	779071646	615108215
SRR12638626	SAMN16130424	Bos_taurus	PRJNA663348	Lavage	Lung	Holstein	male	6_weeks	2820305	1910126	0.677276	276555579	188244447
SRR12638627	SAMN16130179	Bos_taurus	PRJNA663348	Lung_nonlesiononal	Lung	Holstein	male	6_weeks	8669712	6264747	0.722602	841650283	617837868
SRR12638628	SAMN16130175	Bos_taurus	PRJNA663348	Lung_nonlesiononal	Lung	Holstein	male	6_weeks	7941089	5975893	0.752528	774634788	590259972
SRR12638629	SAMN16130171	Bos_taurus	PRJNA663348	Lavage	Lung	Holstein	male	6_weeks	5832463	3517811	0.603143	562839610	345187408
SRR12638630	SAMN16130167	Bos_taurus	PRJNA663348	Lavage	Lung	Holstein	male	6_weeks	10506752	7820004	0.744284	1024143225	768773140
SRR12638631	SAMN16130163	Bos_taurus	PRJNA663348	Lavage	Lung	Holstein	male	6_weeks	7919257	5620693	0.70975	769565148	553697243
SRR12638632	SAMN16130159	Bos_taurus	PRJNA663348	Lavage	Lung	Holstein	male	6_weeks	6704512	4661156	0.695227	650325453	459069307
SRR12638633	SAMN16130155	Bos_taurus	PRJNA663348	Lavage	Lung	Holstein	male	6_weeks	9734887	6654628	0.683586	940252636	653031866
SRR12638634	SAMN16130535	Bos_taurus	PRJNA663348	Whole_blood	Whole_blood	Holstein	male	6_weeks	8819743	6855449	0.777284	862171657	676820850
SRR12638635	SAMN16130531	Bos_taurus	PRJNA663348	Whole_blood	Whole_blood	Holstein	male	6_weeks	9736198	7385490	0.75856	950152642	729221675
SRR12638636	SAMN16130527	Bos_taurus	PRJNA663348	Whole_blood	Whole_blood	Holstein	male	6_weeks	8363533	6498521	0.777007	818335073	642533854
SRR12638637	SAMN16130420	Bos_taurus	PRJNA663348	Lavage	Lung	Holstein	male	6_weeks	2860626	1965802	0.687193	280251841	193455792
SRR12638638	SAMN16130523	Bos_taurus	PRJNA663348	Whole_blood	Whole_blood	Holstein	male	6_weeks	9917286	7588111	0.76514	965767128	747676023
SRR12638639	SAMN16130519	Bos_taurus	PRJNA663348	Whole_blood	Whole_blood	Holstein	male	6_weeks	9186421	6993967	0.761338	894475335	689484011
SRR12638640	SAMN16130515	Bos_taurus	PRJNA663348	Whole_blood	Whole_blood	Holstein	male	6_weeks	8977513	6819449	0.759614	872902091	671660715
SRR12638641	SAMN16130511	Bos_taurus	PRJNA663348	Whole_blood	Whole_blood	Holstein	male	6_weeks	10612746	7822355	0.737072	1034660170	771574311
SRR12638642	SAMN16130507	Bos_taurus	PRJNA663348	Whole_blood	Whole_blood	Holstein	male	6_weeks	8190551	6054958	0.739261	795456664	596095481
SRR12638643	SAMN16130503	Bos_taurus	PRJNA663348	Whole_blood	Whole_blood	Holstein	male	6_weeks	9811860	7374403	0.751581	955165153	727759285
SRR12638644	SAMN16130499	Bos_taurus	PRJNA663348	Whole_blood	Whole_blood	Holstein	male	6_weeks	9907466	7571967	0.764269	969847082	749232868
SRR12638645	SAMN16130495	Bos_taurus	PRJNA663348	Whole_blood	Whole_blood	Holstein	male	6_weeks	13140948	10517515	0.800362	1287510677	1039307321
SRR12638646	SAMN16130491	Bos_taurus	PRJNA663348	Whole_blood	Whole_blood	Holstein	male	6_weeks	9019698	6799094	0.753805	880915485	671980331
SRR12638647	SAMN16130487	Bos_taurus	PRJNA663348	Whole_blood	Whole_blood	Holstein	male	6_weeks	12045481	9485396	0.787465	1180839260	939634519
SRR12638648	SAMN16130416	Bos_taurus	PRJNA663348	Lavage	Lung	Holstein	male	6_weeks	2155450	1863860	0.86472	211074240	183643466
SRR12638649	SAMN16130483	Bos_taurus	PRJNA663348	Whole_blood	Whole_blood	Holstein	male	6_weeks	9469109	7308821	0.771859	924391313	721723827
SRR12638650	SAMN16130479	Bos_taurus	PRJNA663348	Whole_blood	Whole_blood	Holstein	male	6_weeks	10438914	8120711	0.777927	1019760845	802729812
SRR12638651	SAMN16130475	Bos_taurus	PRJNA663348	Lung_nonlesiononal	Lung	Holstein	male	6_weeks	9250629	6934788	0.749656	899294673	683579542
SRR12638652	SAMN16130471	Bos_taurus	PRJNA663348	Lung_nonlesiononal	Lung	Holstein	male	6_weeks	10280827	7701363	0.7491	1002094832	760150923
SRR12638653	SAMN16130467	Bos_taurus	PRJNA663348	Lung_nonlesiononal	Lung	Holstein	male	6_weeks	12470689	9242684	0.741153	1211926800	909483265
SRR12638654	SAMN16130463	Bos_taurus	PRJNA663348	Lung_nonlesiononal	Lung	Holstein	male	6_weeks	9685230	7461355	0.770385	944977219	736629570
SRR12638655	SAMN16130459	Bos_taurus	PRJNA663348	Lung_nonlesiononal	Lung	Holstein	male	6_weeks	8319979	6017954	0.723314	805834214	592271130
SRR12638656	SAMN16130455	Bos_taurus	PRJNA663348	Lung_nonlesiononal	Lung	Holstein	male	6_weeks	13280538	9744826	0.733767	1294645232	962040438
SRR12638657	SAMN16130451	Bos_taurus	PRJNA663348	Lung_nonlesiononal	Lung	Holstein	male	6_weeks	9554045	7087870	0.741871	926000923	698392677
SRR12638658	SAMN16130447	Bos_taurus	PRJNA663348	Lung_nonlesiononal	Lung	Holstein	male	6_weeks	8419420	6478215	0.769437	819212389	638903529
SRR12638659	SAMN16130412	Bos_taurus	PRJNA663348	Lavage	Lung	Holstein	male	6_weeks	2308168	2016004	0.873422	226403423	199059816
SRR12638660	SAMN16130443	Bos_taurus	PRJNA663348	Lung_nonlesiononal	Lung	Holstein	male	6_weeks	6580751	4987261	0.757856	640177042	491345485
SRR12638661	SAMN16130439	Bos_taurus	PRJNA663348	Lung_nonlesiononal	Lung	Holstein	male	6_weeks	8687572	6486138	0.7466	847265484	640463463
SRR12638662	SAMN16130435	Bos_taurus	PRJNA663348	Lung_nonlesiononal	Lung	Holstein	male	6_weeks	9262940	6722659	0.725759	897415836	660634026
SRR12638663	SAMN16130431	Bos_taurus	PRJNA663348	Lung_nonlesiononal	Lung	Holstein	male	6_weeks	9028967	6671590	0.73891	873484655	656133712
SRR12638664	SAMN16130427	Bos_taurus	PRJNA663348	Lavage	Lung	Holstein	male	6_weeks	8505972	5881754	0.691485	822981255	577976446
SRR12638665	SAMN16130423	Bos_taurus	PRJNA663348	Lavage	Lung	Holstein	male	6_weeks	7878528	5111900	0.648839	755171925	499375519
SRR12638666	SAMN16130419	Bos_taurus	PRJNA663348	Lavage	Lung	Holstein	male	6_weeks	6315846	4020840	0.636627	604600191	392217342
SRR12638667	SAMN16130415	Bos_taurus	PRJNA663348	Lavage	Lung	Holstein	male	6_weeks	8046245	5484669	0.681643	781663518	539393453
SRR12638668	SAMN16130411	Bos_taurus	PRJNA663348	Lavage	Lung	Holstein	male	6_weeks	7186259	4921451	0.684842	689542347	481640647
SRR12638669	SAMN16130407	Bos_taurus	PRJNA663348	Lavage	Lung	Holstein	male	6_weeks	7569999	5324480	0.703366	728393326	521801807
SRR12638670	SAMN16130408	Bos_taurus	PRJNA663348	Lavage	Lung	Holstein	male	6_weeks	2596707	2147953	0.827183	253049607	211464060
SRR12638671	SAMN16130403	Bos_taurus	PRJNA663348	Whole_blood	Whole_blood	Holstein	male	6_weeks	8014847	5990523	0.747428	779681063	590412894
SRR12638672	SAMN16130399	Bos_taurus	PRJNA663348	Whole_blood	Whole_blood	Holstein	male	6_weeks	8819044	6948870	0.787939	861631140	686562676
SRR12638673	SAMN16130395	Bos_taurus	PRJNA663348	Whole_blood	Whole_blood	Holstein	male	6_weeks	9985917	7506656	0.751724	973100038	740911637
SRR12638674	SAMN16130391	Bos_taurus	PRJNA663348	Whole_blood	Whole_blood	Holstein	male	6_weeks	9427274	7062969	0.749206	921962840	698974846
SRR12638675	SAMN16130387	Bos_taurus	PRJNA663348	Whole_blood	Whole_blood	Holstein	male	6_weeks	8776882	6563191	0.747782	852623787	647179363
SRR12638676	SAMN16130383	Bos_taurus	PRJNA663348	Whole_blood	Whole_blood	Holstein	male	6_weeks	7614540	5938591	0.779901	744082783	585354916
SRR12638677	SAMN16130379	Bos_taurus	PRJNA663348	Whole_blood	Whole_blood	Holstein	male	6_weeks	10710949	7790035	0.727296	1042572665	768414111
SRR12638678	SAMN16130375	Bos_taurus	PRJNA663348	Whole_blood	Whole_blood	Holstein	male	6_weeks	9228123	6652574	0.720902	894806399	654369182
SRR12638679	SAMN16130371	Bos_taurus	PRJNA663348	Whole_blood	Whole_blood	Holstein	male	6_weeks	7692051	5593474	0.727176	745763788	550490141
SRR12638680	SAMN16130367	Bos_taurus	PRJNA663348	Whole_blood	Whole_blood	Holstein	male	6_weeks	10393975	7787875	0.749268	1018213459	769338068
SRR12638681	SAMN16130404	Bos_taurus	PRJNA663348	Whole_blood	Whole_blood	Holstein	male	6_weeks	2579785	2273227	0.881169	252234821	223863948
SRR12638682	SAMN16130286	Bos_taurus	PRJNA663348	Lavage	Lung	Holstein	male	6_weeks	2924273	2489261	0.851241	285639240	245099062
SRR12638683	SAMN16130363	Bos_taurus	PRJNA663348	Whole_blood	Whole_blood	Holstein	male	6_weeks	8013673	5891025	0.735122	778851412	579492146
SRR12638684	SAMN16130349	Bos_taurus	PRJNA663348	Whole_blood	Whole_blood	Holstein	male	6_weeks	6525934	4831799	0.7404	632151598	474927052
SRR12638685	SAMN16130345	Bos_taurus	PRJNA663348	Whole_blood	Whole_blood	Holstein	male	6_weeks	8890305	6530747	0.734592	865041253	643386670
SRR12638686	SAMN16130341	Bos_taurus	PRJNA663348	Lung_Lession	Lung	Holstein	male	6_weeks	9165335	6496378	0.708799	887098349	637814724
SRR12638687	SAMN16130337	Bos_taurus	PRJNA663348	Lung_Lession	Lung	Holstein	male	6_weeks	11818007	8675519	0.734093	1146041618	853282308
SRR12638688	SAMN16130333	Bos_taurus	PRJNA663348	Lung_Lession	Lung	Holstein	male	6_weeks	9330538	6434558	0.689623	893603197	628159864
SRR12638689	SAMN16130329	Bos_taurus	PRJNA663348	Lung_Lession	Lung	Holstein	male	6_weeks	8406886	5816263	0.691845	807848707	569521183
SRR12638690	SAMN16130299	Bos_taurus	PRJNA663348	Bronchial_lymph_node	Lymph	Holstein	male	6_weeks	2603400	2283156	0.87699	254189766	224576138
SRR12638691	SAMN16130325	Bos_taurus	PRJNA663348	Lung_Lession	Lung	Holstein	male	6_weeks	10160284	7394898	0.727824	985765204	728011013
SRR12638692	SAMN16130295	Bos_taurus	PRJNA663348	Lavage	Lung	Holstein	male	6_weeks	2940910	2448329	0.832507	287702428	241139644
SRR12638693	SAMN16130291	Bos_taurus	PRJNA663348	Lavage	Lung	Holstein	male	6_weeks	2315426	1931282	0.834094	226635014	190368853
SRR12638694	SAMN16130287	Bos_taurus	PRJNA663348	Lavage	Lung	Holstein	male	6_weeks	3334575	2575880	0.772476	325179895	253367536
SRR12638695	SAMN16130283	Bos_taurus	PRJNA663348	Lavage	Lung	Holstein	male	6_weeks	2938389	2539608	0.864286	287158579	250253179
SRR12638696	SAMN16130279	Bos_taurus	PRJNA663348	Lavage	Lung	Holstein	male	6_weeks	3053849	2616566	0.856809	298634424	257878142
SRR12638697	SAMN16130275	Bos_taurus	PRJNA663348	Lavage	Lung	Holstein	male	6_weeks	3356146	2904768	0.865507	327828958	285970072
SRR12638698	SAMN16130270	Bos_taurus	PRJNA663348	Whole_blood	Whole_blood	Holstein	male	6_weeks	2796585	2091426	0.74785	269588184	204835880
SRR12638699	SAMN16130266	Bos_taurus	PRJNA663348	Whole_blood	Whole_blood	Holstein	male	6_weeks	2355130	2041637	0.866889	231308882	202030273
SRR12638700	SAMN16130262	Bos_taurus	PRJNA663348	Whole_blood	Whole_blood	Holstein	male	6_weeks	2557581	2256824	0.882406	251213576	223123052
SRR12638701	SAMN16130310	Bos_taurus	PRJNA663348	Mediastinal_lymph_node	Lymph	Holstein	male	6_weeks	2507408	2202559	0.878421	245212266	216990494
SRR12638702	SAMN16130258	Bos_taurus	PRJNA663348	Whole_blood	Whole_blood	Holstein	male	6_weeks	2503795	2208473	0.88205	245050488	217613126
SRR12638703	SAMN16130254	Bos_taurus	PRJNA663348	Whole_blood	Whole_blood	Holstein	male	6_weeks	2760233	2468468	0.894297	270999864	243853633
SRR12638704	SAMN16130250	Bos_taurus	PRJNA663348	Whole_blood	Whole_blood	Holstein	male	6_weeks	3076439	2676154	0.869887	300262278	263339899
SRR12638705	SAMN16130246	Bos_taurus	PRJNA663348	Whole_blood	Whole_blood	Holstein	male	6_weeks	2901914	2544186	0.876727	281667069	248845936
SRR12638706	SAMN16130242	Bos_taurus	PRJNA663348	Whole_blood	Whole_blood	Holstein	male	6_weeks	3041836	2660501	0.874637	296954859	261866193
SRR12638707	SAMN16130238	Bos_taurus	PRJNA663348	Whole_blood	Whole_blood	Holstein	male	6_weeks	2443242	1804642	0.738626	236444751	177146616
SRR12638708	SAMN16130234	Bos_taurus	PRJNA663348	Whole_blood	Whole_blood	Holstein	male	6_weeks	3091194	2659312	0.860286	303126174	262825105
SRR12638709	SAMN16130228	Bos_taurus	PRJNA663348	Whole_blood	Whole_blood	Holstein	male	6_weeks	2849078	2453502	0.861156	277867919	240992248
SRR12638710	SAMN16130224	Bos_taurus	PRJNA663348	Whole_blood	Whole_blood	Holstein	male	6_weeks	2590500	2267609	0.875356	252067415	222191064
SRR12638711	SAMN16130220	Bos_taurus	PRJNA663348	Lung_Lession	Lung	Holstein	male	6_weeks	2681047	2360642	0.880493	262768130	232963299
SRR12638712	SAMN16130306	Bos_taurus	PRJNA663348	Mediastinal_lymph_node	Lymph	Holstein	male	6_weeks	2752159	2409257	0.875406	269089509	237497831
SRR12638713	SAMN16130216	Bos_taurus	PRJNA663348	Lung_Lession	Lung	Holstein	male	6_weeks	2068372	1512939	0.731464	200191028	148805848
SRR12638714	SAMN16130212	Bos_taurus	PRJNA663348	Lung_Lession	Lung	Holstein	male	6_weeks	2263782	1878778	0.829929	221685147	185381848
SRR12638715	SAMN16130208	Bos_taurus	PRJNA663348	Lung_Lession	Lung	Holstein	male	6_weeks	2838170	2506901	0.883281	278874445	247919267
SRR12638716	SAMN16130204	Bos_taurus	PRJNA663348	Lung_Lession	Lung	Holstein	male	6_weeks	2469445	2096442	0.848953	241367111	206066926
SRR12638717	SAMN16130200	Bos_taurus	PRJNA663348	Lung_Lession	Lung	Holstein	male	6_weeks	2814977	2463446	0.875121	275768421	242939355
SRR12638718	SAMN16130196	Bos_taurus	PRJNA663348	Lung_Lession	Lung	Holstein	male	6_weeks	2813772	2474078	0.879275	274927142	243382515
SRR12638719	SAMN16130192	Bos_taurus	PRJNA663348	Lung_Lession	Lung	Holstein	male	6_weeks	2754574	2453303	0.890629	269775594	241711313
SRR12638720	SAMN16130188	Bos_taurus	PRJNA663348	Lung_Lession	Lung	Holstein	male	6_weeks	2431669	2143666	0.881562	238963486	211927076
SRR12638721	SAMN16130184	Bos_taurus	PRJNA663348	Lung_Lession	Lung	Holstein	male	6_weeks	1714176	1198869	0.699385	165114780	117537662
SRR12638722	SAMN16130180	Bos_taurus	PRJNA663348	Lung_Lession	Lung	Holstein	male	6_weeks	2445711	2051104	0.838653	240541274	203055875
SRR12638723	SAMN16130302	Bos_taurus	PRJNA663348	Mediastinal_lymph_node	Lymph	Holstein	male	6_weeks	3633367	2798308	0.770169	350861575	274111945
SRR12638724	SAMN16130176	Bos_taurus	PRJNA663348	Lung_Lession	Lung	Holstein	male	6_weeks	2668505	2351589	0.881238	262471612	232761972
SRR12638726	SAMN16130321	Bos_taurus	PRJNA663348	Lung_Lession	Lung	Holstein	male	6_weeks	8189642	6013664	0.734301	796324425	593395204
SRR12638727	SAMN16130317	Bos_taurus	PRJNA663348	Lung_Lession	Lung	Holstein	male	6_weeks	8721146	6309611	0.723484	844486525	619667937
SRR12638728	SAMN16130400	Bos_taurus	PRJNA663348	Whole_blood	Whole_blood	Holstein	male	6_weeks	2547477	2261895	0.887896	249584466	222953701
SRR12638729	SAMN16130313	Bos_taurus	PRJNA663348	Lung_Lession	Lung	Holstein	male	6_weeks	7253966	5378286	0.741427	703128357	529350421
SRR12638730	SAMN16130309	Bos_taurus	PRJNA663348	Lung_Lession	Lung	Holstein	male	6_weeks	8813788	6811556	0.77283	859837596	672600945
SRR12638731	SAMN16130305	Bos_taurus	PRJNA663348	Lung_Lession	Lung	Holstein	male	6_weeks	8106609	4987672	0.61526	767762902	484484031
SRR12638732	SAMN16130301	Bos_taurus	PRJNA663348	Lung_Lession	Lung	Holstein	male	6_weeks	7917594	5810045	0.733814	766380491	571631953
SRR12638733	SAMN16130297	Bos_taurus	PRJNA663348	Lavage	Lung	Holstein	male	6_weeks	5715397	4101449	0.717614	553135940	403008297
SRR12638734	SAMN16130293	Bos_taurus	PRJNA663348	Lavage	Lung	Holstein	male	6_weeks	6672513	4615767	0.691758	643442405	452818965
SRR12638735	SAMN16130289	Bos_taurus	PRJNA663348	Lavage	Lung	Holstein	male	6_weeks	11478615	8437229	0.735039	1116223290	831358927
SRR12638736	SAMN16130285	Bos_taurus	PRJNA663348	Lavage	Lung	Holstein	male	6_weeks	9033497	6698908	0.741563	875516469	658859901
SRR12638737	SAMN16130281	Bos_taurus	PRJNA663348	Lavage	Lung	Holstein	male	6_weeks	7437305	5231304	0.703387	716214981	513722476
SRR12638738	SAMN16130277	Bos_taurus	PRJNA663348	Lavage	Lung	Holstein	male	6_weeks	7167053	5076310	0.708284	688077046	497340263
SRR12638739	SAMN16130396	Bos_taurus	PRJNA663348	Whole_blood	Whole_blood	Holstein	male	6_weeks	2243513	1370150	0.610716	211022451	132074384
SRR12638740	SAMN16130272	Bos_taurus	PRJNA663348	Whole_blood	Whole_blood	Holstein	male	6_weeks	3419587	2167194	0.633759	326747847	211989689
SRR12638741	SAMN16130268	Bos_taurus	PRJNA663348	Whole_blood	Whole_blood	Holstein	male	6_weeks	3306546	2444585	0.739317	322103770	241668138
SRR12638743	SAMN16130260	Bos_taurus	PRJNA663348	Whole_blood	Whole_blood	Holstein	male	6_weeks	2846111	1925796	0.676641	274217963	188961692
SRR12638744	SAMN16130256	Bos_taurus	PRJNA663348	Whole_blood	Whole_blood	Holstein	male	6_weeks	3744765	2638334	0.704539	363422703	260099186
SRR12638745	SAMN16130252	Bos_taurus	PRJNA663348	Whole_blood	Whole_blood	Holstein	male	6_weeks	3920477	2983152	0.760916	381650883	294351663
SRR12638746	SAMN16130248	Bos_taurus	PRJNA663348	Whole_blood	Whole_blood	Holstein	male	6_weeks	3433057	2086062	0.60764	324379818	202268319
SRR12638748	SAMN16130240	Bos_taurus	PRJNA663348	Whole_blood	Whole_blood	Holstein	male	6_weeks	3789148	2591122	0.683827	367006117	255054200
SRR12638749	SAMN16130236	Bos_taurus	PRJNA663348	Whole_blood	Whole_blood	Holstein	male	6_weeks	3871458	2926026	0.755794	377995144	289274215
SRR12638750	SAMN16130392	Bos_taurus	PRJNA663348	Whole_blood	Whole_blood	Holstein	male	6_weeks	2740870	2438620	0.889725	268672967	240577335
SRR12638751	SAMN16130232	Bos_taurus	PRJNA663348	Whole_blood	Whole_blood	Holstein	male	6_weeks	3990538	3045166	0.763097	389108525	300680194
SRR12638752	SAMN16130230	Bos_taurus	PRJNA663348	Whole_blood	Whole_blood	Holstein	male	6_weeks	3435740	2480281	0.721906	333921116	244095220
SRR12638753	SAMN16130226	Bos_taurus	PRJNA663348	Whole_blood	Whole_blood	Holstein	male	6_weeks	3969039	2912398	0.733779	386848121	286489311
SRR12638754	SAMN16130222	Bos_taurus	PRJNA663348	Whole_blood	Whole_blood	Holstein	male	6_weeks	3685975	2530276	0.68646	356965067	248660683
SRR12638755	SAMN16130218	Bos_taurus	PRJNA663348	Bronchial_lymph_node	Lymph	Holstein	male	6_weeks	3471522	2510786	0.723252	338577321	248069810
SRR12638756	SAMN16130214	Bos_taurus	PRJNA663348	Bronchial_lymph_node	Lymph	Holstein	male	6_weeks	2984784	2163772	0.724934	290038680	213279642
SRR12638757	SAMN16130210	Bos_taurus	PRJNA663348	Bronchial_lymph_node	Lymph	Holstein	male	6_weeks	3700820	2658223	0.718279	359447243	262230994
SRR12638758	SAMN16130206	Bos_taurus	PRJNA663348	Bronchial_lymph_node	Lymph	Holstein	male	6_weeks	3503708	2574689	0.734847	340477733	253113883
SRR12638759	SAMN16130202	Bos_taurus	PRJNA663348	Bronchial_lymph_node	Lymph	Holstein	male	6_weeks	3273744	2263689	0.691468	316490402	222446876
SRR12638760	SAMN16130198	Bos_taurus	PRJNA663348	Bronchial_lymph_node	Lymph	Holstein	male	6_weeks	4419247	3167306	0.716707	428927404	311681143
SRR12638761	SAMN16130388	Bos_taurus	PRJNA663348	Whole_blood	Whole_blood	Holstein	male	6_weeks	2588079	2245536	0.867646	254387604	222310288
SRR12638762	SAMN16130194	Bos_taurus	PRJNA663348	Bronchial_lymph_node	Lymph	Holstein	male	6_weeks	3280866	2383080	0.726357	318545892	234817643
SRR12638763	SAMN16130190	Bos_taurus	PRJNA663348	Bronchial_lymph_node	Lymph	Holstein	male	6_weeks	3151603	2320562	0.736312	306508413	229135110
SRR12638764	SAMN16130186	Bos_taurus	PRJNA663348	Bronchial_lymph_node	Lymph	Holstein	male	6_weeks	3506160	2674982	0.762938	343440342	265085906
SRR12638767	SAMN16130174	Bos_taurus	PRJNA663348	Bronchial_lymph_node	Lymph	Holstein	male	6_weeks	3219476	2205515	0.685054	312736568	217159132
SRR12638769	SAMN16130166	Bos_taurus	PRJNA663348	Lavage	Lung	Holstein	male	6_weeks	2525272	1616544	0.640146	242123218	158225064
SRR12638770	SAMN16130162	Bos_taurus	PRJNA663348	Lavage	Lung	Holstein	male	6_weeks	2547564	1655015	0.649646	245428714	162453219
SRR12638772	SAMN16130384	Bos_taurus	PRJNA663348	Whole_blood	Whole_blood	Holstein	male	6_weeks	2676058	2281985	0.852741	261451801	224746940
SRR12638773	SAMN16130154	Bos_taurus	PRJNA663348	Lavage	Lung	Holstein	male	6_weeks	3698319	2226870	0.60213	357632453	218000737
SRR12638774	SAMN16130534	Bos_taurus	PRJNA663348	Whole_blood	Whole_blood	Holstein	male	6_weeks	3354654	2521503	0.751643	327253646	248875724
SRR12638775	SAMN16130530	Bos_taurus	PRJNA663348	Whole_blood	Whole_blood	Holstein	male	6_weeks	3480171	2583994	0.742491	339420529	255241771
SRR12638776	SAMN16130526	Bos_taurus	PRJNA663348	Whole_blood	Whole_blood	Holstein	male	6_weeks	2872027	2066484	0.719521	279095211	203664037
SRR12638779	SAMN16130514	Bos_taurus	PRJNA663348	Whole_blood	Whole_blood	Holstein	male	6_weeks	3587938	2705426	0.754034	349888061	266884425
SRR12638780	SAMN16130510	Bos_taurus	PRJNA663348	Whole_blood	Whole_blood	Holstein	male	6_weeks	3670370	2789347	0.759963	358808947	275887671
SRR12638782	SAMN16130502	Bos_taurus	PRJNA663348	Whole_blood	Whole_blood	Holstein	male	6_weeks	3175888	2089516	0.657931	306586197	205059444
SRR12638783	SAMN16130380	Bos_taurus	PRJNA663348	Whole_blood	Whole_blood	Holstein	male	6_weeks	1961691	1755655	0.89497	191597685	172509005
SRR12638784	SAMN16130498	Bos_taurus	PRJNA663348	Whole_blood	Whole_blood	Holstein	male	6_weeks	3334780	2370566	0.710861	325082747	234094997
SRR12638785	SAMN16130494	Bos_taurus	PRJNA663348	Whole_blood	Whole_blood	Holstein	male	6_weeks	3666732	2645632	0.721523	355598241	260195087
SRR12638786	SAMN16130490	Bos_taurus	PRJNA663348	Whole_blood	Whole_blood	Holstein	male	6_weeks	3972449	2479188	0.624096	385464677	243207054
SRR12638787	SAMN16130486	Bos_taurus	PRJNA663348	Whole_blood	Whole_blood	Holstein	male	6_weeks	4311304	2706598	0.627791	417235928	265382792
SRR12638788	SAMN16130482	Bos_taurus	PRJNA663348	Whole_blood	Whole_blood	Holstein	male	6_weeks	3881132	2776925	0.715494	377559927	273683158
SRR12638789	SAMN16130478	Bos_taurus	PRJNA663348	Whole_blood	Whole_blood	Holstein	male	6_weeks	3635444	2508079	0.689896	352902370	247286153
SRR12638790	SAMN16130474	Bos_taurus	PRJNA663348	Bronchial_lymph_node	Lymph	Holstein	male	6_weeks	3408222	2102229	0.616811	326103088	205220020
SRR12638791	SAMN16130470	Bos_taurus	PRJNA663348	Bronchial_lymph_node	Lymph	Holstein	male	6_weeks	4084496	2932365	0.717926	397173375	288960493
SRR12638792	SAMN16130466	Bos_taurus	PRJNA663348	Bronchial_lymph_node	Lymph	Holstein	male	6_weeks	4902226	3680569	0.750795	477796785	363247069
SRR12638794	SAMN16130376	Bos_taurus	PRJNA663348	Whole_blood	Whole_blood	Holstein	male	6_weeks	2513833	2023545	0.804964	244427242	199184730
SRR12638795	SAMN16130458	Bos_taurus	PRJNA663348	Bronchial_lymph_node	Lymph	Holstein	male	6_weeks	3474174	2285594	0.657881	334207708	224104260
SRR12638796	SAMN16130454	Bos_taurus	PRJNA663348	Bronchial_lymph_node	Lymph	Holstein	male	6_weeks	4197024	3020726	0.71973	409408305	298092876
SRR12638797	SAMN16130450	Bos_taurus	PRJNA663348	Bronchial_lymph_node	Lymph	Holstein	male	6_weeks	4000017	2755415	0.688851	386540020	270647255
SRR12638798	SAMN16130446	Bos_taurus	PRJNA663348	Bronchial_lymph_node	Lymph	Holstein	male	6_weeks	3322751	2390975	0.719577	322332310	235131910
SRR12638799	SAMN16130442	Bos_taurus	PRJNA663348	Bronchial_lymph_node	Lymph	Holstein	male	6_weeks	3142715	2218489	0.705915	304724690	218131532
SRR12638800	SAMN16130438	Bos_taurus	PRJNA663348	Bronchial_lymph_node	Lymph	Holstein	male	6_weeks	3338244	2395652	0.717638	324254855	236352356
SRR12638801	SAMN16130434	Bos_taurus	PRJNA663348	Bronchial_lymph_node	Lymph	Holstein	male	6_weeks	3339418	2061517	0.617328	317486896	200648412
SRR12638803	SAMN16130426	Bos_taurus	PRJNA663348	Lavage	Lung	Holstein	male	6_weeks	2990575	1897847	0.634609	287167872	185815083
SRR12638805	SAMN16130372	Bos_taurus	PRJNA663348	Whole_blood	Whole_blood	Holstein	male	6_weeks	2492563	2177416	0.873565	243358960	214259900
SRR12638806	SAMN16130418	Bos_taurus	PRJNA663348	Lavage	Lung	Holstein	male	6_weeks	2685023	1880930	0.700527	259544925	184645333
SRR12638807	SAMN16130414	Bos_taurus	PRJNA663348	Lavage	Lung	Holstein	male	6_weeks	2715474	1841224	0.678049	262845482	181135505
SRR12638808	SAMN16130410	Bos_taurus	PRJNA663348	Lavage	Lung	Holstein	male	6_weeks	3222201	2193697	0.680807	310542683	215174402
SRR12638809	SAMN16130406	Bos_taurus	PRJNA663348	Lavage	Lung	Holstein	male	6_weeks	3127563	2023004	0.646831	299449312	197510759
SRR12638810	SAMN16130402	Bos_taurus	PRJNA663348	Whole_blood	Whole_blood	Holstein	male	6_weeks	3515452	2418863	0.688066	341119572	237732192
SRR12638811	SAMN16130398	Bos_taurus	PRJNA663348	Whole_blood	Whole_blood	Holstein	male	6_weeks	3556973	2442358	0.686639	343875674	239903942
SRR12638814	SAMN16130386	Bos_taurus	PRJNA663348	Whole_blood	Whole_blood	Holstein	male	6_weeks	3770239	2686971	0.712679	367251914	264907803
SRR12638815	SAMN16130382	Bos_taurus	PRJNA663348	Whole_blood	Whole_blood	Holstein	male	6_weeks	2177955	1465158	0.672722	210125207	143460543
SRR12638816	SAMN16130368	Bos_taurus	PRJNA663348	Whole_blood	Whole_blood	Holstein	male	6_weeks	2539087	2219241	0.874031	248587030	218860789
SRR12638817	SAMN16130378	Bos_taurus	PRJNA663348	Whole_blood	Whole_blood	Holstein	male	6_weeks	3868035	2898202	0.74927	378778902	286713339
SRR12638818	SAMN16130374	Bos_taurus	PRJNA663348	Whole_blood	Whole_blood	Holstein	male	6_weeks	3284550	2336673	0.711413	318811000	230117721
SRR12638819	SAMN16130370	Bos_taurus	PRJNA663348	Whole_blood	Whole_blood	Holstein	male	6_weeks	2665217	1897517	0.711956	258418677	186861807
SRR12638820	SAMN16130366	Bos_taurus	PRJNA663348	Whole_blood	Whole_blood	Holstein	male	6_weeks	3004587	2189622	0.72876	292276663	216039898
SRR12638821	SAMN16130362	Bos_taurus	PRJNA663348	Whole_blood	Whole_blood	Holstein	male	6_weeks	2644676	2074513	0.784411	259027732	205033440
SRR12638822	SAMN16130348	Bos_taurus	PRJNA663348	Whole_blood	Whole_blood	Holstein	male	6_weeks	4051004	2870264	0.708532	396861283	282406711
SRR12638823	SAMN16130344	Bos_taurus	PRJNA663348	Lung_nonlesiononal	Lung	Holstein	male	6_weeks	2537827	1613949	0.635957	242359788	157624919
SRR12638824	SAMN16130340	Bos_taurus	PRJNA663348	Lung_nonlesiononal	Lung	Holstein	male	6_weeks	2721406	1783813	0.655475	262181000	174758582
SRR12638825	SAMN16130336	Bos_taurus	PRJNA663348	Lung_nonlesiononal	Lung	Holstein	male	6_weeks	3912554	2452003	0.626701	376089128	239342213
SRR12638827	SAMN16130364	Bos_taurus	PRJNA663348	Whole_blood	Whole_blood	Holstein	male	6_weeks	2872072	2516288	0.876123	281274186	248271946
SRR12638828	SAMN16130282	Bos_taurus	PRJNA663348	Lavage	Lung	Holstein	male	6_weeks	2519496	2232922	0.886257	246598281	220112334
SRR12638830	SAMN16130324	Bos_taurus	PRJNA663348	Lung_nonlesiononal	Lung	Holstein	male	6_weeks	3304936	2185708	0.661347	319003601	214372659
SRR12638831	SAMN16130320	Bos_taurus	PRJNA663348	Lung_nonlesiononal	Lung	Holstein	male	6_weeks	3181409	2321338	0.729657	309880734	229293839
SRR12638832	SAMN16130316	Bos_taurus	PRJNA663348	Lung_nonlesiononal	Lung	Holstein	male	6_weeks	2686843	1891147	0.703855	259584855	185749920
SRR12638833	SAMN16130312	Bos_taurus	PRJNA663348	Lung_nonlesiononal	Lung	Holstein	male	6_weeks	3248212	2356590	0.725504	316120492	232232560
SRR12638834	SAMN16130308	Bos_taurus	PRJNA663348	Lung_nonlesiononal	Lung	Holstein	male	6_weeks	3027238	2020712	0.66751	291455744	198119963
SRR12638836	SAMN16130300	Bos_taurus	PRJNA663348	Lung_nonlesiononal	Lung	Holstein	male	6_weeks	3253768	2384378	0.732805	316291253	234934132
SRR12638837	SAMN16130296	Bos_taurus	PRJNA663348	Lavage	Lung	Holstein	male	6_weeks	2911980	2085080	0.716035	281544494	205034912
SRR12638838	SAMN16130292	Bos_taurus	PRJNA663348	Lavage	Lung	Holstein	male	6_weeks	2814398	1837156	0.652771	270945513	180024609
SRR12638839	SAMN16130350	Bos_taurus	PRJNA663348	Whole_blood	Whole_blood	Holstein	male	6_weeks	2335894	2027364	0.867918	227517205	198951054
SRR12638841	SAMN16130284	Bos_taurus	PRJNA663348	Lavage	Lung	Holstein	male	6_weeks	2518078	1704867	0.677051	241921221	167199102
SRR12638842	SAMN16130280	Bos_taurus	PRJNA663348	Lavage	Lung	Holstein	male	6_weeks	2449533	1639528	0.669323	235791865	161043483
SRR12638844	SAMN16130271	Bos_taurus	PRJNA663348	Whole_blood	Whole_blood	Holstein	male	6_weeks	1972390	1300944	0.659577	187505937	126326523
SRR12638845	SAMN16130267	Bos_taurus	PRJNA663348	Whole_blood	Whole_blood	Holstein	male	6_weeks	2501572	1893779	0.757036	242384916	185914206
SRR12638846	SAMN16130263	Bos_taurus	PRJNA663348	Whole_blood	Whole_blood	Holstein	male	6_weeks	3270183	2748783	0.840559	320344589	271593130
SRR12638847	SAMN16130259	Bos_taurus	PRJNA663348	Whole_blood	Whole_blood	Holstein	male	6_weeks	2982460	2495370	0.836682	290906070	245587927
SRR12638848	SAMN16130255	Bos_taurus	PRJNA663348	Whole_blood	Whole_blood	Holstein	male	6_weeks	3806890	2626416	0.689911	365408829	256331104
SRR12638849	SAMN16130251	Bos_taurus	PRJNA663348	Whole_blood	Whole_blood	Holstein	male	6_weeks	3517769	2960484	0.84158	342073151	290859202
SRR12638850	SAMN16130346	Bos_taurus	PRJNA663348	Whole_blood	Whole_blood	Holstein	male	6_weeks	2206468	1945138	0.881562	215470269	191304430
SRR12638851	SAMN16130247	Bos_taurus	PRJNA663348	Whole_blood	Whole_blood	Holstein	male	6_weeks	3315104	2770182	0.835624	321055993	270984056
SRR12638852	SAMN16130243	Bos_taurus	PRJNA663348	Whole_blood	Whole_blood	Holstein	male	6_weeks	3710956	3166147	0.853189	362277378	311817199
SRR12638853	SAMN16130239	Bos_taurus	PRJNA663348	Whole_blood	Whole_blood	Holstein	male	6_weeks	2538411	1850892	0.729154	244870762	181282335
SRR12638854	SAMN16130235	Bos_taurus	PRJNA663348	Whole_blood	Whole_blood	Holstein	male	6_weeks	3048301	2509570	0.823268	297896905	247735228
SRR12638855	SAMN16130229	Bos_taurus	PRJNA663348	Whole_blood	Whole_blood	Holstein	male	6_weeks	3190407	2742778	0.859695	310503564	268990005
SRR12638856	SAMN16130225	Bos_taurus	PRJNA663348	Whole_blood	Whole_blood	Holstein	male	6_weeks	3114537	2484931	0.797849	300581046	241963688
SRR12638857	SAMN16130221	Bos_taurus	PRJNA663348	Whole_blood	Whole_blood	Holstein	male	6_weeks	3180995	2667010	0.83842	310069392	262259136
SRR12638858	SAMN16130217	Bos_taurus	PRJNA663348	Mediastinal_lymph_node	Lymph	Holstein	male	6_weeks	2069704	1421318	0.686725	198685126	138993025
SRR12638859	SAMN16130213	Bos_taurus	PRJNA663348	Mediastinal_lymph_node	Lymph	Holstein	male	6_weeks	2636650	2204585	0.836131	257298209	217117981
SRR12638860	SAMN16130209	Bos_taurus	PRJNA663348	Mediastinal_lymph_node	Lymph	Holstein	male	6_weeks	2924556	2469732	0.844481	286182192	244192311
SRR12638861	SAMN16130342	Bos_taurus	PRJNA663348	Mediastinal_lymph_node	Lymph	Holstein	male	6_weeks	2694255	2331095	0.865209	262780918	229232601
SRR12638862	SAMN16130205	Bos_taurus	PRJNA663348	Mediastinal_lymph_node	Lymph	Holstein	male	6_weeks	2736009	2358307	0.861951	266308986	231297229
SRR12638863	SAMN16130201	Bos_taurus	PRJNA663348	Mediastinal_lymph_node	Lymph	Holstein	male	6_weeks	3067934	2588773	0.843816	299301895	254850277
SRR12638864	SAMN16130197	Bos_taurus	PRJNA663348	Mediastinal_lymph_node	Lymph	Holstein	male	6_weeks	2793618	2517206	0.901056	273133236	247826436
SRR12638865	SAMN16130193	Bos_taurus	PRJNA663348	Mediastinal_lymph_node	Lymph	Holstein	male	6_weeks	2917807	2503432	0.857984	285020901	246461053
SRR12638866	SAMN16130189	Bos_taurus	PRJNA663348	Mediastinal_lymph_node	Lymph	Holstein	male	6_weeks	2677327	2257848	0.843322	261912004	222725005
SRR12638867	SAMN16130185	Bos_taurus	PRJNA663348	Mediastinal_lymph_node	Lymph	Holstein	male	6_weeks	1759797	1186054	0.673972	168608767	115897965
SRR12638868	SAMN16130181	Bos_taurus	PRJNA663348	Mediastinal_lymph_node	Lymph	Holstein	male	6_weeks	2137665	1629422	0.762244	206384733	159945741
SRR12638869	SAMN16130177	Bos_taurus	PRJNA663348	Mediastinal_lymph_node	Lymph	Holstein	male	6_weeks	2539073	1953495	0.769373	245801043	192018358
SRR12638870	SAMN16130173	Bos_taurus	PRJNA663348	Mediastinal_lymph_node	Lymph	Holstein	male	6_weeks	2304547	1814181	0.787218	223719853	178530398
SRR12638872	SAMN16130338	Bos_taurus	PRJNA663348	Mediastinal_lymph_node	Lymph	Holstein	male	6_weeks	2334826	2018179	0.864381	227827640	198445424
SRR12638873	SAMN16130165	Bos_taurus	PRJNA663348	Lavage	Lung	Holstein	male	6_weeks	2769836	1989999	0.718454	267009892	194024956
SRR12638874	SAMN16130161	Bos_taurus	PRJNA663348	Lavage	Lung	Holstein	male	6_weeks	2940960	2114935	0.719131	287086068	208213089
SRR12638875	SAMN16130157	Bos_taurus	PRJNA663348	Lavage	Lung	Holstein	male	6_weeks	3060547	2403819	0.785421	298677547	236682267
SRR12638877	SAMN16130533	Bos_taurus	PRJNA663348	Whole_blood	Whole_blood	Holstein	male	6_weeks	1548342	1011882	0.653526	145606905	97655110
SRR12638878	SAMN16130529	Bos_taurus	PRJNA663348	Whole_blood	Whole_blood	Holstein	male	6_weeks	2307872	1657052	0.718	221057023	161845834
SRR12638879	SAMN16130525	Bos_taurus	PRJNA663348	Whole_blood	Whole_blood	Holstein	male	6_weeks	1857387	1248071	0.67195	176688682	121503943
SRR12638880	SAMN16130521	Bos_taurus	PRJNA663348	Whole_blood	Whole_blood	Holstein	male	6_weeks	2013721	1329964	0.660451	188410687	127596456
SRR12638881	SAMN16130517	Bos_taurus	PRJNA663348	Whole_blood	Whole_blood	Holstein	male	6_weeks	2502472	1777808	0.710421	238825517	173175257
SRR12638882	SAMN16130513	Bos_taurus	PRJNA663348	Whole_blood	Whole_blood	Holstein	male	6_weeks	2350551	1769342	0.752735	226769864	173323718
SRR12638883	SAMN16130334	Bos_taurus	PRJNA663348	Mediastinal_lymph_node	Lymph	Holstein	male	6_weeks	3204025	2878479	0.898395	312799091	282472415
SRR12638884	SAMN16130509	Bos_taurus	PRJNA663348	Whole_blood	Whole_blood	Holstein	male	6_weeks	3236960	2648444	0.818189	315887719	260899936
SRR12638885	SAMN16130505	Bos_taurus	PRJNA663348	Whole_blood	Whole_blood	Holstein	male	6_weeks	1642954	1075999	0.654917	155787035	104277248
SRR12638886	SAMN16130501	Bos_taurus	PRJNA663348	Whole_blood	Whole_blood	Holstein	male	6_weeks	3001336	1983578	0.660898	284823687	192919847
SRR12638887	SAMN16130497	Bos_taurus	PRJNA663348	Whole_blood	Whole_blood	Holstein	male	6_weeks	2957952	2451623	0.828824	289002552	241756496
SRR12638888	SAMN16130493	Bos_taurus	PRJNA663348	Whole_blood	Whole_blood	Holstein	male	6_weeks	3097237	2561744	0.827106	299134854	250484999
SRR12638889	SAMN16130489	Bos_taurus	PRJNA663348	Whole_blood	Whole_blood	Holstein	male	6_weeks	2843040	2294925	0.807208	276654457	226196843
SRR12638890	SAMN16130485	Bos_taurus	PRJNA663348	Whole_blood	Whole_blood	Holstein	male	6_weeks	3238035	2802607	0.865527	316956124	276478311
SRR12638891	SAMN16130481	Bos_taurus	PRJNA663348	Whole_blood	Whole_blood	Holstein	male	6_weeks	2998558	2597623	0.866291	292644711	255663249
SRR12638892	SAMN16130477	Bos_taurus	PRJNA663348	Whole_blood	Whole_blood	Holstein	male	6_weeks	2637438	2311991	0.876605	258002047	227938973
SRR12638893	SAMN16130473	Bos_taurus	PRJNA663348	Mediastinal_lymph_node	Lymph	Holstein	male	6_weeks	1740428	1232112	0.707936	167285588	120377860
SRR12638894	SAMN16130330	Bos_taurus	PRJNA663348	Mediastinal_lymph_node	Lymph	Holstein	male	6_weeks	2752727	2404301	0.873425	267090063	235423419
SRR12638895	SAMN16130469	Bos_taurus	PRJNA663348	Mediastinal_lymph_node	Lymph	Holstein	male	6_weeks	2237028	1678490	0.750321	215603969	164322862
SRR12638896	SAMN16130465	Bos_taurus	PRJNA663348	Mediastinal_lymph_node	Lymph	Holstein	male	6_weeks	3396771	2934058	0.863779	330720108	287858941
SRR12638897	SAMN16130461	Bos_taurus	PRJNA663348	Mediastinal_lymph_node	Lymph	Holstein	male	6_weeks	2705664	2212500	0.817729	262745142	217455123
SRR12638898	SAMN16130457	Bos_taurus	PRJNA663348	Mediastinal_lymph_node	Lymph	Holstein	male	6_weeks	2923952	2398969	0.820454	285065933	236598705
SRR12638899	SAMN16130453	Bos_taurus	PRJNA663348	Mediastinal_lymph_node	Lymph	Holstein	male	6_weeks	3161835	2706850	0.856101	310625152	268235014
SRR12638900	SAMN16130449	Bos_taurus	PRJNA663348	Mediastinal_lymph_node	Lymph	Holstein	male	6_weeks	3265964	2847040	0.87173	319272576	280402111
SRR12638901	SAMN16130445	Bos_taurus	PRJNA663348	Mediastinal_lymph_node	Lymph	Holstein	male	6_weeks	2901473	2527966	0.87127	282604149	248193806
SRR12638902	SAMN16130441	Bos_taurus	PRJNA663348	Mediastinal_lymph_node	Lymph	Holstein	male	6_weeks	1641696	1211553	0.737989	157985325	118370239
SRR12638903	SAMN16130437	Bos_taurus	PRJNA663348	Mediastinal_lymph_node	Lymph	Holstein	male	6_weeks	2520109	2115059	0.839273	246683876	208961698
SRR12638904	SAMN16130433	Bos_taurus	PRJNA663348	Mediastinal_lymph_node	Lymph	Holstein	male	6_weeks	3167348	2684963	0.847701	308439175	264112552
SRR12638905	SAMN16130326	Bos_taurus	PRJNA663348	Mediastinal_lymph_node	Lymph	Holstein	male	6_weeks	2354607	2009400	0.853391	230134774	198000423
SRR12638906	SAMN16130429	Bos_taurus	PRJNA663348	Mediastinal_lymph_node	Lymph	Holstein	male	6_weeks	3315811	2777401	0.837623	322574729	273190891
SRR12638907	SAMN16130425	Bos_taurus	PRJNA663348	Lavage	Lung	Holstein	male	6_weeks	3083378	2127714	0.690059	301530864	209529461
SRR12638908	SAMN16130421	Bos_taurus	PRJNA663348	Lavage	Lung	Holstein	male	6_weeks	3415565	2985658	0.874133	334797359	294627756
SRR12638909	SAMN16130417	Bos_taurus	PRJNA663348	Lavage	Lung	Holstein	male	6_weeks	2759631	2193246	0.794761	268727669	215574502
SRR12638910	SAMN16130413	Bos_taurus	PRJNA663348	Lavage	Lung	Holstein	male	6_weeks	2906533	2418847	0.83221	284217109	238653478
SRR12638911	SAMN16130409	Bos_taurus	PRJNA663348	Lavage	Lung	Holstein	male	6_weeks	1894662	1245691	0.657474	179251996	120556169
SRR12638912	SAMN16130405	Bos_taurus	PRJNA663348	Lavage	Lung	Holstein	male	6_weeks	2301473	1785409	0.775768	222110006	174555871
SRR12638913	SAMN16130401	Bos_taurus	PRJNA663348	Whole_blood	Whole_blood	Holstein	male	6_weeks	3126664	2572740	0.822839	304304891	252863322
SRR12638914	SAMN16130397	Bos_taurus	PRJNA663348	Whole_blood	Whole_blood	Holstein	male	6_weeks	3303204	2765932	0.837348	322512116	272716627
SRR12638915	SAMN16130393	Bos_taurus	PRJNA663348	Whole_blood	Whole_blood	Holstein	male	6_weeks	3162837	2661117	0.84137	308340419	262107508
SRR12638916	SAMN16130322	Bos_taurus	PRJNA663348	Mediastinal_lymph_node	Lymph	Holstein	male	6_weeks	2834236	2456980	0.866893	277259057	242270840
SRR12638917	SAMN16130389	Bos_taurus	PRJNA663348	Whole_blood	Whole_blood	Holstein	male	6_weeks	3362867	2916496	0.867265	330317473	288713231
SRR12638918	SAMN16130385	Bos_taurus	PRJNA663348	Whole_blood	Whole_blood	Holstein	male	6_weeks	3461955	3021009	0.872631	339317644	298295966
SRR12638919	SAMN16130381	Bos_taurus	PRJNA663348	Whole_blood	Whole_blood	Holstein	male	6_weeks	2508686	2163513	0.862409	244386598	212260133
SRR12638920	SAMN16130377	Bos_taurus	PRJNA663348	Whole_blood	Whole_blood	Holstein	male	6_weeks	2724404	2175525	0.798532	264767965	213881862
SRR12638921	SAMN16130373	Bos_taurus	PRJNA663348	Whole_blood	Whole_blood	Holstein	male	6_weeks	2687972	2271449	0.845042	262316175	223706627
SRR12638922	SAMN16130369	Bos_taurus	PRJNA663348	Whole_blood	Whole_blood	Holstein	male	6_weeks	3038351	2635022	0.867254	297097368	259826192
SRR12638923	SAMN16130365	Bos_taurus	PRJNA663348	Whole_blood	Whole_blood	Holstein	male	6_weeks	2874135	2352578	0.818534	279096846	231090276
SRR12638924	SAMN16130351	Bos_taurus	PRJNA663348	Whole_blood	Whole_blood	Holstein	male	6_weeks	2455197	2017103	0.821565	238308826	197763065
SRR12638925	SAMN16130347	Bos_taurus	PRJNA663348	Whole_blood	Whole_blood	Holstein	male	6_weeks	2383621	2047276	0.858893	232226042	201087494
SRR12638926	SAMN16130343	Bos_taurus	PRJNA663348	Bronchial_lymph_node	Lymph	Holstein	male	6_weeks	3061054	2664342	0.8704	299255611	262530691
SRR12638927	SAMN16130318	Bos_taurus	PRJNA663348	Mediastinal_lymph_node	Lymph	Holstein	male	6_weeks	3144753	2769929	0.88081	308891732	273860685
SRR12638928	SAMN16130339	Bos_taurus	PRJNA663348	Bronchial_lymph_node	Lymph	Holstein	male	6_weeks	2843549	2370706	0.833714	276664903	232757626
SRR12638929	SAMN16130335	Bos_taurus	PRJNA663348	Bronchial_lymph_node	Lymph	Holstein	male	6_weeks	3207071	2262873	0.705589	303939657	218768511
SRR12638930	SAMN16130331	Bos_taurus	PRJNA663348	Bronchial_lymph_node	Lymph	Holstein	male	6_weeks	2618855	1883889	0.719356	247374989	181962909
SRR12638931	SAMN16130327	Bos_taurus	PRJNA663348	Bronchial_lymph_node	Lymph	Holstein	male	6_weeks	2567174	2149856	0.837441	249389895	211356984
SRR12638932	SAMN16130323	Bos_taurus	PRJNA663348	Bronchial_lymph_node	Lymph	Holstein	male	6_weeks	3026058	2552021	0.843348	294195906	250831489
SRR12638933	SAMN16130319	Bos_taurus	PRJNA663348	Bronchial_lymph_node	Lymph	Holstein	male	6_weeks	2718456	2336173	0.859375	265996189	230732704
SRR12638934	SAMN16130315	Bos_taurus	PRJNA663348	Bronchial_lymph_node	Lymph	Holstein	male	6_weeks	2541542	2123517	0.835523	245906885	207698169
SRR12638935	SAMN16130311	Bos_taurus	PRJNA663348	Bronchial_lymph_node	Lymph	Holstein	male	6_weeks	2913520	2483719	0.852481	284036846	244434865
SRR12638936	SAMN16130307	Bos_taurus	PRJNA663348	Bronchial_lymph_node	Lymph	Holstein	male	6_weeks	2766315	2391062	0.864349	270364990	235668080
SRR12638937	SAMN16130303	Bos_taurus	PRJNA663348	Bronchial_lymph_node	Lymph	Holstein	male	6_weeks	2447318	1802681	0.736595	234735208	175710041
SRR12638938	SAMN16130314	Bos_taurus	PRJNA663348	Mediastinal_lymph_node	Lymph	Holstein	male	6_weeks	1718265	1466524	0.853491	167247721	143894212
SRR12638939	SAMN16130278	Bos_taurus	PRJNA663348	Lavage	Lung	Holstein	male	6_weeks	2340918	2077828	0.887612	229834203	205397016
SRR12638940	SAMN16130274	Bos_taurus	PRJNA663348	Lavage	Lung	Holstein	male	6_weeks	2985726	2657180	0.889961	292121105	261722623
SRR12660013	SAMN16197774	Bos_taurus	PRJNA664093	Adipose	Adipose	Holstein_X_Angus	NA	NA	59086217	51628879	0.873789	8861519026	7747912587
SRR12660014	SAMN16197773	Bos_taurus	PRJNA664093	Adipose	Adipose	Holstein_X_Angus	NA	NA	51141704	45018708	0.880274	7670892093	6757085545
SRR12660015	SAMN16197772	Bos_taurus	PRJNA664093	Adipose	Adipose	Holstein_X_Angus	NA	NA	56185178	49807448	0.886487	8428610094	7476906724
SRR12660016	SAMN16197771	Bos_taurus	PRJNA664093	Adipose	Adipose	Holstein_X_Angus	NA	NA	58490145	50995513	0.871865	8773082082	7655304376
SRR12660017	SAMN16197770	Bos_taurus	PRJNA664093	Adipose	Adipose	Holstein_X_Angus	NA	NA	50926161	41722025	0.819265	7628731231	6263735708
SRR12660018	SAMN16197768	Bos_taurus	PRJNA664093	Adipose	Adipose	Holstein_X_Angus	NA	NA	48840606	43727682	0.895314	7316542480	6558421209
SRR12660019	SAMN16197767	Bos_taurus	PRJNA664093	Adipose	Adipose	Holstein_X_Angus	NA	NA	36483798	32685842	0.8959	5466630122	4899678565
SRR12660020	SAMN16197766	Bos_taurus	PRJNA664093	Adipose	Adipose	Holstein_X_Angus	NA	NA	47526344	42996670	0.904691	7117421199	6443556492
SRR12660021	SAMN16197765	Bos_taurus	PRJNA664093	Adipose	Adipose	Holstein_X_Angus	NA	NA	37395994	33382832	0.892685	5604003850	5006184184
SRR12660022	SAMN16197764	Bos_taurus	PRJNA664093	Adipose	Adipose	Holstein_X_Angus	NA	NA	48084068	40802056	0.848557	7200571562	6116813710
SRR12660023	SAMN16197785	Bos_taurus	PRJNA664093	Adipose	Adipose	Holstein_X_Angus	NA	NA	43743862	38992310	0.891378	6553987115	5846469240
SRR12660024	SAMN16197784	Bos_taurus	PRJNA664093	Adipose	Adipose	Holstein_X_Angus	NA	NA	49489982	43481456	0.878591	7417586940	6524709351
SRR12660025	SAMN16197783	Bos_taurus	PRJNA664093	Adipose	Adipose	Holstein_X_Angus	NA	NA	45614895	40097729	0.879049	6839863305	6019365739
SRR12660026	SAMN16197782	Bos_taurus	PRJNA664093	Adipose	Adipose	Holstein_X_Angus	NA	NA	46787587	39419177	0.842514	7019714232	5917441205
SRR12660027	SAMN16197781	Bos_taurus	PRJNA664093	Adipose	Adipose	Holstein_X_Angus	NA	NA	45655098	35153428	0.769978	6845930132	5279422770
SRR12660028	SAMN16197780	Bos_taurus	PRJNA664093	Adipose	Adipose	Holstein_X_Angus	NA	NA	54303078	46566134	0.857523	8142435852	6992678329
SRR12660029	SAMN16197779	Bos_taurus	PRJNA664093	Adipose	Adipose	Holstein_X_Angus	NA	NA	58841686	51451366	0.874403	8827981391	7724831143
SRR12660030	SAMN16197778	Bos_taurus	PRJNA664093	Adipose	Adipose	Holstein_X_Angus	NA	NA	56800288	49348374	0.868805	8512403428	7405173983
SRR12660031	SAMN16197777	Bos_taurus	PRJNA664093	Adipose	Adipose	Holstein_X_Angus	NA	NA	53470950	48089228	0.899352	8015879201	7217755260
SRR12660032	SAMN16197776	Bos_taurus	PRJNA664093	Adipose	Adipose	Holstein_X_Angus	NA	NA	42992581	37803109	0.879294	6447160945	5674615685
SRR12660033	SAMN16197775	Bos_taurus	PRJNA664093	Adipose	Adipose	Holstein_X_Angus	NA	NA	48936987	43095343	0.880629	7337057839	6468723597
SRR12660034	SAMN16197794	Bos_taurus	PRJNA664093	Adipose	Adipose	Holstein_X_Angus	NA	NA	45605294	40651584	0.891379	6843138170	6102701193
SRR12660035	SAMN16197793	Bos_taurus	PRJNA664093	Adipose	Adipose	Holstein_X_Angus	NA	NA	49256048	43341678	0.879926	7388919796	6507498928
SRR12660036	SAMN16197792	Bos_taurus	PRJNA664093	Adipose	Adipose	Holstein_X_Angus	NA	NA	55973097	50707261	0.905922	8396352929	7609737728
SRR12660037	SAMN16197791	Bos_taurus	PRJNA664093	Adipose	Adipose	Holstein_X_Angus	NA	NA	52459339	46013695	0.877131	7870179307	6908997024
SRR12660038	SAMN16197790	Bos_taurus	PRJNA664093	Adipose	Adipose	Holstein_X_Angus	NA	NA	52408723	44901097	0.856749	7866034743	6744755062
SRR12660039	SAMN16197789	Bos_taurus	PRJNA664093	Adipose	Adipose	Holstein_X_Angus	NA	NA	53212763	46428969	0.872516	7974440072	6969915831
SRR12660040	SAMN16197788	Bos_taurus	PRJNA664093	Adipose	Adipose	Holstein_X_Angus	NA	NA	55004433	49023909	0.891272	8250833139	7359900425
SRR12660041	SAMN16197787	Bos_taurus	PRJNA664093	Adipose	Adipose	Holstein_X_Angus	NA	NA	64006783	56743219	0.886519	9600370604	8516263617
SRR12660042	SAMN16197786	Bos_taurus	PRJNA664093	Adipose	Adipose	Holstein_X_Angus	NA	NA	46387034	41003834	0.88395	6950563788	6148888121
SRR12747833	SAMN16306784	Bos_taurus	PRJNA666649	Liver	Liver	NA	NA	NA	75755241	72748113	0.960305	7601104080	7299957438
SRR12747834	SAMN16306783	Bos_taurus	PRJNA666649	Liver	Liver	NA	NA	NA	64783508	61689238	0.952237	6501052404	6190748083
SRR12747835	SAMN16306782	Bos_taurus	PRJNA666649	Liver	Liver	NA	NA	NA	33945090	32527588	0.958241	3404144868	3262303104
SRR12747836	SAMN16306781	Bos_taurus	PRJNA666649	Liver	Liver	NA	NA	NA	88101689	84473185	0.958815	8839122952	8475539627
SRR12747837	SAMN16306780	Bos_taurus	PRJNA666649	Liver	Liver	NA	NA	NA	46888205	45150881	0.962948	4703203284	4529333929
SRR12747838	SAMN16306779	Bos_taurus	PRJNA666649	Liver	Liver	NA	NA	NA	30247418	29119820	0.962721	3035071416	2922033234
SRR12747839	SAMN16306778	Bos_taurus	PRJNA666649	Liver	Liver	NA	NA	NA	80099633	77732863	0.970452	8038717567	7801353356
SRR12747840	SAMN16306777	Bos_taurus	PRJNA666649	Liver	Liver	NA	NA	NA	50246608	48703298	0.969285	5041866185	4887175787
SRR12747841	SAMN16306776	Bos_taurus	PRJNA666649	Liver	Liver	NA	NA	NA	66496952	63511358	0.955102	6672629754	6373496514
SRR12747842	SAMN16306775	Bos_taurus	PRJNA666649	Liver	Liver	NA	NA	NA	53943388	52583686	0.974794	5410359236	5274617834
SRR12747843	SAMN16306774	Bos_taurus	PRJNA666649	Liver	Liver	NA	NA	NA	54093608	51897874	0.959409	5426779920	5207005336
SRR12747844	SAMN16306772	Bos_taurus	PRJNA666649	Liver	Liver	NA	NA	NA	94833451	91081101	0.960432	9514311928	9138276948
SRR12747845	SAMN16306630	Bos_taurus	PRJNA666649	Liver	Liver	NA	NA	NA	52844459	50887589	0.962969	5300381367	5104209926
SRR12747846	SAMN16306629	Bos_taurus	PRJNA666649	Liver	Liver	NA	NA	NA	51189504	49322194	0.963522	5136622151	4949733101
SRR12747847	SAMN16306628	Bos_taurus	PRJNA666649	Liver	Liver	NA	NA	NA	66118830	64144350	0.970137	6635255874	6437353427
SRR12747848	SAMN16306627	Bos_taurus	PRJNA666649	Liver	Liver	NA	NA	NA	79742160	76041278	0.953589	8002487327	7631572909
SRR12747849	SAMN16306626	Bos_taurus	PRJNA666649	Liver	Liver	NA	NA	NA	37619932	35951684	0.955655	3774613620	3607322158
SRR12747850	SAMN16306625	Bos_taurus	PRJNA666649	Liver	Liver	NA	NA	NA	41323933	39754575	0.962023	4143644730	3986876553
SRR12747851	SAMN16306773	Bos_taurus	PRJNA666649	Liver	Liver	NA	NA	NA	46192947	44402331	0.961236	4634941352	4455537228
SRR12747852	SAMN16306624	Bos_taurus	PRJNA666649	Liver	Liver	NA	NA	NA	37819236	36477696	0.964528	3795441884	3660865935
SRR12747853	SAMN16306623	Bos_taurus	PRJNA666649	Liver	Liver	NA	NA	NA	40567854	38953872	0.960215	4070849282	3909214634
SRR12747854	SAMN16306643	Bos_taurus	PRJNA666649	Liver	Liver	NA	NA	NA	31549793	30681379	0.972475	3166318393	3079336195
SRR12747855	SAMN16306642	Bos_taurus	PRJNA666649	Liver	Liver	NA	NA	NA	48435629	46731735	0.964821	4859602234	4688627343
SRR12747856	SAMN16306641	Bos_taurus	PRJNA666649	Liver	Liver	NA	NA	NA	62531556	59632360	0.953636	6274504208	5983751193
SRR12747857	SAMN16306640	Bos_taurus	PRJNA666649	Liver	Liver	NA	NA	NA	41850906	40220022	0.961031	4197163426	4033856131
SRR12747858	SAMN16306639	Bos_taurus	PRJNA666649	Liver	Liver	NA	NA	NA	57932787	55745695	0.962248	5812356419	5593158680
SRR12747859	SAMN16306638	Bos_taurus	PRJNA666649	Liver	Liver	NA	NA	NA	61687470	58693548	0.951466	6188971994	5888679479
SRR12747860	SAMN16306637	Bos_taurus	PRJNA666649	Liver	Liver	NA	NA	NA	45830020	44056734	0.961307	4598528490	4420726616
SRR12747861	SAMN16306636	Bos_taurus	PRJNA666649	Liver	Liver	NA	NA	NA	33246913	31974445	0.961727	3335974251	3208522101
SRR12747862	SAMN16306635	Bos_taurus	PRJNA666649	Liver	Liver	NA	NA	NA	68391459	65923261	0.963911	6863779818	6616059790
SRR12747863	SAMN16306634	Bos_taurus	PRJNA666649	Liver	Liver	NA	NA	NA	65522052	62867694	0.959489	6575298245	6308952043
SRR12794653	SAMN16396603	Bos_taurus	PRJNA668102	Adipose	Adipose	NA	NA	NA	58290395	56618245	0.971313	8628675474	8396893567
SRR12794654	SAMN16396602	Bos_taurus	PRJNA668102	Adipose	Adipose	NA	NA	NA	53485998	52143904	0.974908	7921688249	7734661231
SRR12794655	SAMN16396601	Bos_taurus	PRJNA668102	Adipose	Adipose	NA	NA	NA	53331469	51201689	0.960065	7884082708	7586520590
SRR12794656	SAMN16396600	Bos_taurus	PRJNA668102	Adipose	Adipose	NA	NA	NA	50652213	49423899	0.97575	7501817594	7331077633
SRR12794657	SAMN16396646	Bos_taurus	PRJNA668102	Adipose	Adipose	NA	NA	NA	60293812	59070434	0.97971	8930241060	8760726765
SRR12794658	SAMN16396645	Bos_taurus	PRJNA668102	Adipose	Adipose	NA	NA	NA	58965369	57686531	0.978312	8737143830	8561255598
SRR12794659	SAMN16396644	Bos_taurus	PRJNA668102	Adipose	Adipose	NA	NA	NA	55257202	53862528	0.97476	8179334577	7988834289
SRR12794660	SAMN16396643	Bos_taurus	PRJNA668102	Adipose	Adipose	NA	NA	NA	58295043	57003915	0.977852	8630889235	8452794197
SRR12794661	SAMN16396642	Bos_taurus	PRJNA668102	Adipose	Adipose	NA	NA	NA	59294768	57898746	0.976456	8775487217	8583431511
SRR12794662	SAMN16396641	Bos_taurus	PRJNA668102	Adipose	Adipose	NA	NA	NA	58288927	56850205	0.975317	8628448441	8429590070
SRR12794663	SAMN16396640	Bos_taurus	PRJNA668102	Adipose	Adipose	NA	NA	NA	58095626	56690882	0.97582	8614730078	8417291337
SRR12794664	SAMN16396639	Bos_taurus	PRJNA668102	Adipose	Adipose	NA	NA	NA	56288064	54577284	0.969607	8327133310	8087654947
SRR12794665	SAMN16396638	Bos_taurus	PRJNA668102	Adipose	Adipose	NA	NA	NA	64984422	63697192	0.980192	9628291352	9449603074
SRR12794666	SAMN16396619	Bos_taurus	PRJNA668102	Adipose	Adipose	NA	NA	NA	61437897	59880457	0.97465	9104439290	8887856108
SRR12794667	SAMN16396618	Bos_taurus	PRJNA668102	Adipose	Adipose	NA	NA	NA	63968275	62515485	0.977289	9469630635	9270113316
SRR12794668	SAMN16396617	Bos_taurus	PRJNA668102	Adipose	Adipose	NA	NA	NA	59380431	57716319	0.971975	8773067971	8545915106
SRR12794669	SAMN16396616	Bos_taurus	PRJNA668102	Adipose	Adipose	NA	NA	NA	58442408	56994354	0.975223	8687732124	8485972056
SRR12794670	SAMN16396615	Bos_taurus	PRJNA668102	Adipose	Adipose	NA	NA	NA	59335659	58046631	0.978276	8830050817	8647893908
SRR12794671	SAMN16396614	Bos_taurus	PRJNA668102	Adipose	Adipose	NA	NA	NA	64124037	62779095	0.979026	9503195914	9316759811
SRR12794672	SAMN16396620	Bos_taurus	PRJNA668102	Adipose	Adipose	NA	NA	NA	62091055	60732497	0.97812	9189980874	9003079882
SRR12794673	SAMN16396613	Bos_taurus	PRJNA668102	Adipose	Adipose	NA	NA	NA	62339206	60820842	0.975644	9268842169	9057077527
SRR12794674	SAMN16396612	Bos_taurus	PRJNA668102	Adipose	Adipose	NA	NA	NA	53197377	51659931	0.971099	7905309638	7689828742
SRR12794675	SAMN16396611	Bos_taurus	PRJNA668102	Adipose	Adipose	NA	NA	NA	61670848	60179364	0.975815	9173149401	8965633683
SRR12794676	SAMN16396610	Bos_taurus	PRJNA668102	Adipose	Adipose	NA	NA	NA	59701279	58348699	0.977344	8879912332	8692457270
SRR12794677	SAMN16396609	Bos_taurus	PRJNA668102	Adipose	Adipose	NA	NA	NA	53402817	52190031	0.97729	7942674145	7772455698
SRR12794678	SAMN16396608	Bos_taurus	PRJNA668102	Adipose	Adipose	NA	NA	NA	60833206	59341196	0.975474	9046305883	8838916047
SRR12794679	SAMN16396607	Bos_taurus	PRJNA668102	Adipose	Adipose	NA	NA	NA	59944810	58518368	0.976204	8915411377	8714546431
SRR12794680	SAMN16396606	Bos_taurus	PRJNA668102	Adipose	Adipose	NA	NA	NA	47018329	45875957	0.975704	6992646952	6834376281
SRR12800530	SAMN16402804	Bos_taurus	PRJNA668296	Whole_blood	Whole_blood	Holstein	NA	15_month	26187765	23620879	0.901981	3740565571	3377831051
SRR12800531	SAMN16402803	Bos_taurus	PRJNA668296	Whole_blood	Whole_blood	Holstein	NA	15_month	29544956	27595684	0.934024	4227528300	3952638918
SRR12800532	SAMN16402802	Bos_taurus	PRJNA668296	Whole_blood	Whole_blood	Holstein	NA	15_month	37640956	35254928	0.936611	5370937244	5033924782
SRR12800533	SAMN16402801	Bos_taurus	PRJNA668296	Whole_blood	Whole_blood	Holstein	NA	15_month	25678415	23396223	0.911124	3666160886	3342398464
SRR12800534	SAMN16402800	Bos_taurus	PRJNA668296	Whole_blood	Whole_blood	Holstein	NA	15_month	32290880	28316238	0.876911	4611859173	4050793568
SRR12800535	SAMN16402799	Bos_taurus	PRJNA668296	Whole_blood	Whole_blood	Holstein	NA	15_month	39872192	36812554	0.923264	5685308347	5261774086
SRR12800536	SAMN16402798	Bos_taurus	PRJNA668296	Whole_blood	Whole_blood	Holstein	NA	15_month	29319238	27496222	0.937822	4188838785	3937121707
SRR12800537	SAMN16402796	Bos_taurus	PRJNA668296	Whole_blood	Whole_blood	Holstein	NA	15_month	33465744	32072894	0.95838	4474017324	4288373750
SRR12800538	SAMN16402795	Bos_taurus	PRJNA668296	Whole_blood	Whole_blood	Holstein	NA	15_month	31811116	29488044	0.926973	4536339960	4213421847
SRR12800539	SAMN16402794	Bos_taurus	PRJNA668296	Whole_blood	Whole_blood	Holstein	NA	15_month	38757492	37098744	0.957202	5513867643	5280818895
SRR12800540	SAMN16402830	Bos_taurus	PRJNA668296	Whole_blood	Whole_blood	Holstein	NA	15_month	31325639	30230185	0.96503	4427737697	4282517294
SRR12800541	SAMN16402829	Bos_taurus	PRJNA668296	Whole_blood	Whole_blood	Holstein	NA	15_month	31340502	28393432	0.905966	4470336366	4057258736
SRR12800542	SAMN16402828	Bos_taurus	PRJNA668296	Whole_blood	Whole_blood	Holstein	NA	15_month	30119208	25342664	0.841412	4313361077	3655421622
SRR12800543	SAMN16402827	Bos_taurus	PRJNA668296	Whole_blood	Whole_blood	Holstein	NA	15_month	35198016	31834608	0.904443	5039722057	4568675307
SRR12800544	SAMN16402826	Bos_taurus	PRJNA668296	Whole_blood	Whole_blood	Holstein	NA	15_month	29742994	27827084	0.935584	4236635196	3967584148
SRR12800545	SAMN16402825	Bos_taurus	PRJNA668296	Whole_blood	Whole_blood	Holstein	NA	15_month	33911482	31909978	0.940979	4860205190	4579222205
SRR12800546	SAMN16402824	Bos_taurus	PRJNA668296	Whole_blood	Whole_blood	Holstein	NA	15_month	29597178	26572632	0.89781	4205555111	3783610533
SRR12800547	SAMN16402823	Bos_taurus	PRJNA668296	Whole_blood	Whole_blood	Holstein	NA	15_month	28565553	23558817	0.824728	4083807971	3382866115
SRR12800548	SAMN16402820	Bos_taurus	PRJNA668296	Whole_blood	Whole_blood	Holstein	NA	15_month	33183306	29804992	0.898192	4708236943	4248061453
SRR12800549	SAMN16402819	Bos_taurus	PRJNA668296	Whole_blood	Whole_blood	Holstein	NA	15_month	28864100	25731582	0.891474	3866388290	3455734628
SRR12800550	SAMN16403028	Bos_taurus	PRJNA668296	Whole_blood	Whole_blood	Holstein	NA	15_month	32295962	29982558	0.928369	4558391397	4248717398
SRR12800551	SAMN16403027	Bos_taurus	PRJNA668296	Whole_blood	Whole_blood	Holstein	NA	15_month	39309983	38384073	0.976446	5740023884	5610741476
SRR12800552	SAMN16402822	Bos_taurus	PRJNA668296	Whole_blood	Whole_blood	Holstein	NA	15_month	27920663	26278669	0.941191	4096578351	3858303855
SRR12800553	SAMN16402821	Bos_taurus	PRJNA668296	Whole_blood	Whole_blood	Holstein	NA	15_month	33892875	31872829	0.940399	4961857762	4670684692
SRR12800554	SAMN16403026	Bos_taurus	PRJNA668296	Whole_blood	Whole_blood	Holstein	NA	15_month	42621933	41341683	0.969963	6230228871	6049835026
SRR12800555	SAMN16403025	Bos_taurus	PRJNA668296	Whole_blood	Whole_blood	Holstein	NA	15_month	31099882	29013072	0.9329	4561181567	4260235995
SRR12800556	SAMN16403024	Bos_taurus	PRJNA668296	Whole_blood	Whole_blood	Holstein	NA	15_month	42080064	39376614	0.935755	6177780550	5784995933
SRR12800557	SAMN16403023	Bos_taurus	PRJNA668296	Whole_blood	Whole_blood	Holstein	NA	15_month	41555272	39148248	0.942077	6089657512	5741579562
SRR12800558	SAMN16403022	Bos_taurus	PRJNA668296	Whole_blood	Whole_blood	Holstein	NA	15_month	35788673	34532041	0.964887	5244709423	5067543856
SRR12800559	SAMN16403058	Bos_taurus	PRJNA668296	Whole_blood	Whole_blood	Holstein	NA	15_month	17584997	17040021	0.969009	2578917766	2502059048
SRR12800560	SAMN16403057	Bos_taurus	PRJNA668296	Whole_blood	Whole_blood	Holstein	NA	15_month	15599599	15111531	0.968713	2288390369	2219612559
SRR12800561	SAMN16403056	Bos_taurus	PRJNA668296	Whole_blood	Whole_blood	Holstein	NA	15_month	37374008	34961170	0.935441	5478160892	5128006317
SRR12800562	SAMN16403055	Bos_taurus	PRJNA668296	Whole_blood	Whole_blood	Holstein	NA	15_month	30656972	29974130	0.977726	4460961258	4364656664
SRR12800563	SAMN16403054	Bos_taurus	PRJNA668296	Whole_blood	Whole_blood	Holstein	NA	15_month	36960152	35597790	0.96314	5423866796	5231297031
SRR12800564	SAMN16403053	Bos_taurus	PRJNA668296	Whole_blood	Whole_blood	Holstein	NA	15_month	40224520	38943214	0.968146	5881385292	5702842449
SRR12800565	SAMN16403052	Bos_taurus	PRJNA668296	Whole_blood	Whole_blood	Holstein	NA	15_month	35736350	34648180	0.96955	5216572905	5064373909
SRR12800566	SAMN16403051	Bos_taurus	PRJNA668296	Whole_blood	Whole_blood	Holstein	NA	15_month	35379320	33023190	0.933404	5194740729	4853165767
SRR12800567	SAMN16403050	Bos_taurus	PRJNA668296	Whole_blood	Whole_blood	Holstein	NA	15_month	29726198	28216194	0.949203	4365223490	4150750313
SRR12800568	SAMN16403049	Bos_taurus	PRJNA668296	Whole_blood	Whole_blood	Holstein	NA	15_month	35276065	32981919	0.934966	5170278413	4837230264
SRR12800569	SAMN16403048	Bos_taurus	PRJNA668296	Whole_blood	Whole_blood	Holstein	NA	15_month	29694187	28428189	0.957365	4342102258	4167112632
SRR12800570	SAMN16403047	Bos_taurus	PRJNA668296	Whole_blood	Whole_blood	Holstein	NA	15_month	34691787	33626197	0.969284	5092005491	4940775929
SRR12800571	SAMN16403046	Bos_taurus	PRJNA668296	Whole_blood	Whole_blood	Holstein	NA	15_month	29494428	28456000	0.964792	4308595985	4162698643
SRR12800572	SAMN16403045	Bos_taurus	PRJNA668296	Whole_blood	Whole_blood	Holstein	NA	15_month	23710905	22574447	0.95207	3400471927	3247137045
SRR12800573	SAMN16403044	Bos_taurus	PRJNA668296	Whole_blood	Whole_blood	Holstein	NA	15_month	27368928	26578788	0.97113	3951492937	3842991609
SRR12800574	SAMN16403043	Bos_taurus	PRJNA668296	Whole_blood	Whole_blood	Holstein	NA	15_month	24439084	22526612	0.921745	3548373225	3275103150
SRR12800575	SAMN16403042	Bos_taurus	PRJNA668296	Whole_blood	Whole_blood	Holstein	NA	15_month	33997286	32676510	0.961151	4975839055	4789780739
SRR12800576	SAMN16403088	Bos_taurus	PRJNA668296	Whole_blood	Whole_blood	Holstein	NA	15_month	22414663	20919941	0.933315	3280145507	3069622864
SRR12800577	SAMN16403087	Bos_taurus	PRJNA668296	Whole_blood	Whole_blood	Holstein	NA	15_month	29166461	27982669	0.959413	4271845779	4103913454
SRR12800578	SAMN16403086	Bos_taurus	PRJNA668296	Whole_blood	Whole_blood	Holstein	NA	15_month	46140400	43729334	0.947745	6770441538	6425331172
SRR12800579	SAMN16403183	Bos_taurus	PRJNA668296	Whole_blood	Whole_blood	Holstein	NA	15_month	36083321	34578037	0.958283	5285522346	5073105035
SRR12800580	SAMN16403182	Bos_taurus	PRJNA668296	Whole_blood	Whole_blood	Holstein	NA	15_month	33154885	31862245	0.961012	4847917375	4666172367
SRR12800581	SAMN16403181	Bos_taurus	PRJNA668296	Whole_blood	Whole_blood	Holstein	NA	15_month	35989303	34524405	0.959296	5265220486	5058677742
SRR12800582	SAMN16403073	Bos_taurus	PRJNA668296	Whole_blood	Whole_blood	Holstein	NA	15_month	31643992	30287628	0.957137	4627905609	4437772272
SRR12800583	SAMN16403072	Bos_taurus	PRJNA668296	Whole_blood	Whole_blood	Holstein	NA	15_month	32396179	31215237	0.963547	4737897084	4572366566
SRR12800584	SAMN16403150	Bos_taurus	PRJNA668296	Whole_blood	Whole_blood	Holstein	NA	15_month	35713905	34170601	0.956787	5225560191	5007816553
SRR12800585	SAMN16403180	Bos_taurus	PRJNA668296	Whole_blood	Whole_blood	Holstein	NA	15_month	32013754	30824220	0.962843	4670872029	4503953621
SRR12800586	SAMN16403179	Bos_taurus	PRJNA668296	Whole_blood	Whole_blood	Holstein	NA	15_month	29130299	28110053	0.964976	4262044812	4118803847
SRR12800587	SAMN16403178	Bos_taurus	PRJNA668296	Whole_blood	Whole_blood	Holstein	NA	15_month	41284902	39555210	0.958104	6042005183	5797804577
SRR12800588	SAMN16403177	Bos_taurus	PRJNA668296	Whole_blood	Whole_blood	Holstein	NA	15_month	27970826	26742624	0.95609	4103958715	3929560980
SRR12800589	SAMN16403176	Bos_taurus	PRJNA668296	Whole_blood	Whole_blood	Holstein	NA	15_month	42886024	41340754	0.963968	6272159733	6055540347
SRR12800590	SAMN16403175	Bos_taurus	PRJNA668296	Whole_blood	Whole_blood	Holstein	NA	15_month	35102784	33895630	0.965611	5133283134	4963997073
SRR12800591	SAMN16403174	Bos_taurus	PRJNA668296	Whole_blood	Whole_blood	Holstein	NA	15_month	30274711	29078853	0.9605	4405710757	4243228130
SRR12800592	SAMN16403173	Bos_taurus	PRJNA668296	Whole_blood	Whole_blood	Holstein	NA	15_month	36466268	34879564	0.956488	5342419787	5117282558
SRR12800593	SAMN16403172	Bos_taurus	PRJNA668296	Whole_blood	Whole_blood	Holstein	NA	15_month	35270248	33955414	0.962721	5158832034	4973361435
SRR12800594	SAMN16403171	Bos_taurus	PRJNA668296	Whole_blood	Whole_blood	Holstein	NA	15_month	17281052	16561954	0.958388	2522472368	2422238038
SRR12800595	SAMN16403170	Bos_taurus	PRJNA668296	Whole_blood	Whole_blood	Holstein	NA	15_month	16374034	15698514	0.958744	2378873889	2289918321
SRR12800596	SAMN16403169	Bos_taurus	PRJNA668296	Whole_blood	Whole_blood	Holstein	NA	15_month	29858566	28569072	0.956813	4365591577	4183623661
SRR12800597	SAMN16403168	Bos_taurus	PRJNA668296	Whole_blood	Whole_blood	Holstein	NA	15_month	21228823	20196595	0.951376	3104367786	2959496595
SRR12800598	SAMN16403167	Bos_taurus	PRJNA668296	Whole_blood	Whole_blood	Holstein	NA	15_month	17630789	17028117	0.965817	2572834703	2488471570
SRR12800599	SAMN16403166	Bos_taurus	PRJNA668296	Whole_blood	Whole_blood	Holstein	NA	15_month	32547424	31614310	0.971331	4758066785	4626865542
SRR12800600	SAMN16403194	Bos_taurus	PRJNA668296	Whole_blood	Whole_blood	Holstein	NA	15_month	19729174	18840338	0.954948	2882855378	2758477558
SRR12800601	SAMN16403193	Bos_taurus	PRJNA668296	Whole_blood	Whole_blood	Holstein	NA	15_month	23946742	23054814	0.962754	3387726820	3268408448
SRR12800602	SAMN16403192	Bos_taurus	PRJNA668296	Whole_blood	Whole_blood	Holstein	NA	15_month	25809302	24715034	0.957602	3774066032	3620554538
SRR12800603	SAMN16403191	Bos_taurus	PRJNA668296	Whole_blood	Whole_blood	Holstein	NA	15_month	40326010	38803352	0.962241	5886795687	5672879734
SRR12800604	SAMN16403190	Bos_taurus	PRJNA668296	Whole_blood	Whole_blood	Holstein	NA	15_month	13841215	13249801	0.957272	2022347713	1939918746
SRR12800605	SAMN16403189	Bos_taurus	PRJNA668296	Whole_blood	Whole_blood	Holstein	NA	15_month	18887078	18064572	0.956451	2768313998	2651661339
SRR12800606	SAMN16403188	Bos_taurus	PRJNA668296	Whole_blood	Whole_blood	Holstein	NA	15_month	19545217	18596987	0.951485	2857992013	2724662463
SRR12800607	SAMN16403187	Bos_taurus	PRJNA668296	Whole_blood	Whole_blood	Holstein	NA	15_month	31210920	29736550	0.952761	4559653718	4352673384
SRR12800608	SAMN16403186	Bos_taurus	PRJNA668296	Whole_blood	Whole_blood	Holstein	NA	15_month	26601383	25696293	0.965976	3671973360	3554498971
SRR12800609	SAMN16403185	Bos_taurus	PRJNA668296	Whole_blood	Whole_blood	Holstein	NA	15_month	19146072	17958726	0.937985	2731530103	2566884094
SRR12800610	SAMN16403184	Bos_taurus	PRJNA668296	Whole_blood	Whole_blood	Holstein	NA	15_month	39216583	37690165	0.961077	5718267724	5505314698
SRR12800611	SAMN16403139	Bos_taurus	PRJNA668296	Whole_blood	Whole_blood	Holstein	NA	15_month	35659760	33275964	0.933152	5227170131	4889112428
SRR12800612	SAMN16403138	Bos_taurus	PRJNA668296	Whole_blood	Whole_blood	Holstein	NA	15_month	23638438	22959926	0.971296	3453003881	3357866982
SRR12800613	SAMN16403137	Bos_taurus	PRJNA668296	Whole_blood	Whole_blood	Holstein	NA	15_month	18970302	18002504	0.948984	2774131803	2638409663
SRR12800614	SAMN16403136	Bos_taurus	PRJNA668296	Whole_blood	Whole_blood	Holstein	NA	15_month	29252345	27996499	0.957069	4281613150	4104533787
SRR12800615	SAMN16403135	Bos_taurus	PRJNA668296	Whole_blood	Whole_blood	Holstein	NA	15_month	22390472	20634056	0.921555	3292301824	3038586362
SRR12800616	SAMN16403134	Bos_taurus	PRJNA668296	Whole_blood	Whole_blood	Holstein	NA	15_month	29028106	26617586	0.916959	4273451556	3933579572
SRR12800617	SAMN16403133	Bos_taurus	PRJNA668296	Whole_blood	Whole_blood	Holstein	NA	15_month	35560295	33525523	0.94278	5223068587	4938457959
SRR12800618	SAMN16403132	Bos_taurus	PRJNA668296	Whole_blood	Whole_blood	Holstein	NA	15_month	32848550	30703456	0.934697	4827771770	4524210041
SRR12800619	SAMN16403131	Bos_taurus	PRJNA668296	Whole_blood	Whole_blood	Holstein	NA	15_month	40858646	37282588	0.912477	5915846493	5423772054
SRR12800620	SAMN16403130	Bos_taurus	PRJNA668296	Whole_blood	Whole_blood	Holstein	NA	15_month	33421412	31528248	0.943355	4912142369	4644360817
SRR12800621	SAMN16403129	Bos_taurus	PRJNA668296	Whole_blood	Whole_blood	Holstein	NA	15_month	34952153	32697799	0.935502	5140371033	4821350456
SRR12800622	SAMN16403128	Bos_taurus	PRJNA668296	Whole_blood	Whole_blood	Holstein	NA	15_month	47026595	44350319	0.94309	6882464942	6506292427
SRR12800623	SAMN16403165	Bos_taurus	PRJNA668296	Whole_blood	Whole_blood	Holstein	NA	15_month	27445804	26293738	0.958024	4032201690	3869553954
SRR12800624	SAMN16403164	Bos_taurus	PRJNA668296	Whole_blood	Whole_blood	Holstein	NA	15_month	24969906	23709754	0.949533	3671927453	3493143784
SRR12800625	SAMN16403163	Bos_taurus	PRJNA668296	Whole_blood	Whole_blood	Holstein	NA	15_month	38575399	35764803	0.92714	5673439071	5279619212
SRR12800626	SAMN16403162	Bos_taurus	PRJNA668296	Whole_blood	Whole_blood	Holstein	NA	15_month	28528433	27405449	0.960636	4190147395	4031572897
SRR12800627	SAMN16403161	Bos_taurus	PRJNA668296	Whole_blood	Whole_blood	Holstein	NA	15_month	34939372	33240222	0.951369	5133067289	4892161382
SRR12800628	SAMN16403160	Bos_taurus	PRJNA668296	Whole_blood	Whole_blood	Holstein	NA	15_month	30169787	28044457	0.929554	4439892879	4138456497
SRR12800629	SAMN16403159	Bos_taurus	PRJNA668296	Whole_blood	Whole_blood	Holstein	NA	15_month	24752937	23206091	0.937509	3639780075	3421178225
SRR12800630	SAMN16403158	Bos_taurus	PRJNA668296	Whole_blood	Whole_blood	Holstein	NA	15_month	25342198	23776216	0.938207	3678163236	3463936082
SRR12800631	SAMN16403157	Bos_taurus	PRJNA668296	Whole_blood	Whole_blood	Holstein	NA	15_month	43499357	41400895	0.951759	6336642181	6046788402
SRR12800632	SAMN16403156	Bos_taurus	PRJNA668296	Whole_blood	Whole_blood	Holstein	NA	15_month	33763510	32042132	0.949017	4955993395	4713611170
SRR12800633	SAMN16403155	Bos_taurus	PRJNA668296	Whole_blood	Whole_blood	Holstein	NA	15_month	26208713	24758325	0.94466	3858988860	3652882038
SRR12800634	SAMN16403154	Bos_taurus	PRJNA668296	Whole_blood	Whole_blood	Holstein	NA	15_month	29346528	24919840	0.849158	4099791223	3667221304
SRR12880550	SAMN16519654	Bos_taurus	PRJNA670731	Embryo	Fetus	NA	NA	NA	30220092	27123880	0.897545	3001890725	2701726051
[truncated: 5,533 more rows]

## Sheet: Table S6
Run	BioProject	BioSample	Organism	Tissue	Breed	Sex	Age
SRR23602504	PRJNA938112	SAMN33426224	Bos_taurus	Whole_Blood	Holstein	NA	NA
SRR23602520	PRJNA938112	SAMN33426226	Bos_taurus	Whole_Blood	Holstein	NA	NA
SRR23602527	PRJNA938112	SAMN33426227	Bos_taurus	Whole_Blood	Holstein	NA	NA
SRR23602511	PRJNA938112	SAMN33426225	Bos_taurus	Whole_Blood	Holstein	NA	NA
SRR23602524	PRJNA938112	SAMN33426227	Bos_taurus	Whole_Blood	Holstein	NA	NA
SRR23602514	PRJNA938112	SAMN33426224	Bos_taurus	Whole_Blood	Holstein	NA	NA
SRR23602505	PRJNA938112	SAMN33426225	Bos_taurus	Whole_Blood	Holstein	NA	NA
SRR23602506	PRJNA938112	SAMN33426225	Bos_taurus	Whole_Blood	Holstein	NA	NA
SRR23602501	PRJNA938112	SAMN33426224	Bos_taurus	Whole_Blood	Holstein	NA	NA
SRR23602513	PRJNA938112	SAMN33426224	Bos_taurus	Whole_Blood	Holstein	NA	NA
SRR23602526	PRJNA938112	SAMN33426227	Bos_taurus	Whole_Blood	Holstein	NA	NA
SRR23602523	PRJNA938112	SAMN33426227	Bos_taurus	Whole_Blood	Holstein	NA	NA
SRR23602518	PRJNA938112	SAMN33426226	Bos_taurus	Whole_Blood	Holstein	NA	NA
SRR23602530	PRJNA938112	SAMN33426227	Bos_taurus	Whole_Blood	Holstein	NA	NA
SRR23602519	PRJNA938112	SAMN33426226	Bos_taurus	Whole_Blood	Holstein	NA	NA
SRR23602509	PRJNA938112	SAMN33426225	Bos_taurus	Whole_Blood	Holstein	NA	NA
SRR23602528	PRJNA938112	SAMN33426227	Bos_taurus	Whole_Blood	Holstein	NA	NA
SRR23602510	PRJNA938112	SAMN33426225	Bos_taurus	Whole_Blood	Holstein	NA	NA
SRR23602525	PRJNA938112	SAMN33426227	Bos_taurus	Whole_Blood	Holstein	NA	NA
SRR23602529	PRJNA938112	SAMN33426227	Bos_taurus	Whole_Blood	Holstein	NA	NA
SRR23602500	PRJNA938112	SAMN33426224	Bos_taurus	Whole_Blood	Holstein	NA	NA
SRR23602522	PRJNA938112	SAMN33426226	Bos_taurus	Whole_Blood	Holstein	NA	NA
SRR23602517	PRJNA938112	SAMN33426226	Bos_taurus	Whole_Blood	Holstein	NA	NA
SRR23602507	PRJNA938112	SAMN33426225	Bos_taurus	Whole_Blood	Holstein	NA	NA
SRR23602512	PRJNA938112	SAMN33426225	Bos_taurus	Whole_Blood	Holstein	NA	NA
SRR23602516	PRJNA938112	SAMN33426226	Bos_taurus	Whole_Blood	Holstein	NA	NA
SRR23602503	PRJNA938112	SAMN33426224	Bos_taurus	Whole_Blood	Holstein	NA	NA
SRR23602521	PRJNA938112	SAMN33426226	Bos_taurus	Whole_Blood	Holstein	NA	NA
SRR23602499	PRJNA938112	SAMN33426224	Bos_taurus	Whole_Blood	Holstein	NA	NA
SRR23602508	PRJNA938112	SAMN33426225	Bos_taurus	Whole_Blood	Holstein	NA	NA
SRR23602502	PRJNA938112	SAMN33426224	Bos_taurus	Whole_Blood	Holstein	NA	NA
SRR23602515	PRJNA938112	SAMN33426226	Bos_taurus	Whole_Blood	Holstein	NA	NA
SRR12927127	PRJNA672996	SAMN16580588	Bos_taurus	Rumen	Hostein	NA	NA
SRR10680314	PRJNA595394	SAMN13552819	Bos_taurus	Embryo	Holstein	NA	NA
SRR11053338	PRJNA605780	SAMN14078855	Bos_taurus	Oocyte	NA	GSM4304859	NA
ERR9846746	PRJEB53517	SAMEA110114441	Bos_taurus	Adipose	Hereford	NA	NA
SRR11477012	PRJNA622966	SAMN14533662	Bos_taurus	Bronchial_lymph_node	Holstein-Friesian	GSM4453146	NA
ERR9846824	PRJEB53517	SAMEA110114522	Bos_taurus	Adipose	Hereford	NA	NA
SRR11053348	PRJNA605780	SAMN14078845	Bos_taurus	Embryo	NA	GSM4304869	NA
SRR22728356	PRJNA912081	SAMN32218612	Bos_taurus	Embryo	NA	NA	NA
SRR22071402	PRJNA894119	SAMN31438017	Bos_grunniens	Testes	NA	NA	NA
SRR11477015	PRJNA622966	SAMN14533659	Bos_taurus	Bronchial_lymph_node	Holstein-Friesian	GSM4453149	NA
SRR11688212	PRJNA601200	SAMN14836333	Bos_taurus	Embryo	NA	GSM4516360	NA
SRR17608310	PRJNA797029	SAMN24962408	Bos_taurus	Embryo	NA	NA	NA
SRR11053389	PRJNA605780	SAMN14078860	Bos_taurus	Embryo	NA	GSM4304910	NA
SRR15652151	PRJNA758280	SAMN21019943	Bos_indicus	Liver	Brahman	GSM5542864	NA
SRR11688217	PRJNA601200	SAMN14836328	Bos_taurus	Embryonic_stem_cells	NA	GSM4516365	NA
SRR11477016	PRJNA622966	SAMN14533658	Bos_taurus	Bronchial_lymph_node	Holstein-Friesian	GSM4453150	NA
SRR11053340	PRJNA605780	SAMN14078853	Bos_taurus	Oocyte	NA	GSM4304861	NA
SRR10680313	PRJNA595394	SAMN13552820	Bos_taurus	Embryo	Holstein	NA	NA
SRR12927108	PRJNA672996	SAMN16580586	Bos_taurus	Rumen	Hostein	NA	NA
ERR9846760	PRJEB53517	SAMEA110114455	Bos_taurus	Mammary	Holstein	NA	NA
SRR10680296	PRJNA595394	SAMN13552828	Bos_taurus	Embryo	Holstein	NA	NA
SRR11053375	PRJNA605780	SAMN14078874	Bos_taurus	Embryo	NA	GSM4304896	NA
SRR10680300	PRJNA595394	SAMN13552825	Bos_taurus	Embryo	Holstein	NA	NA
SRR10887637	PRJNA601200	SAMN13859670	Bos_taurus	Oocyte	NA	GSM4271533	NA
SRR11053368	PRJNA605780	SAMN14078881	Bos_taurus	Embryo	NA	GSM4304889	NA
SRR11053343	PRJNA605780	SAMN14078850	Bos_taurus	Oocyte	NA	GSM4304864	NA
SRR10680307	PRJNA595394	SAMN13552812	Bos_taurus	Embryo	Holstein	NA	NA
SRR11053346	PRJNA605780	SAMN14078847	Bos_taurus	Oocyte	NA	GSM4304867	NA
SRR11053384	PRJNA605780	SAMN14078865	Bos_taurus	Embryo	NA	GSM4304905	NA
SRR10887624	PRJNA601200	SAMN13859686	Bos_taurus	Embryo	NA	GSM4271520	NA
SRR9733935	PRJNA555664	SAMN12326997	Bos_taurus	Muscle	Qinchuan	NA	NA
ERR9846772	PRJEB53517	SAMEA110114468	Bos_taurus	kidney	Hereford	NA	NA
SRR10680310	PRJNA595394	SAMN13552823	Bos_taurus	Embryo	Holstein	NA	NA
SRR22728347	PRJNA912081	SAMN32218603	Bos_taurus	Embryo	NA	NA	NA
SRR11053373	PRJNA605780	SAMN14078876	Bos_taurus	Embryo	NA	GSM4304894	NA
SRR10887633	PRJNA601200	SAMN13859675	Bos_taurus	Embryo	NA	GSM4271529	NA
ERR9846761	PRJEB53517	SAMEA110114456	Bos_taurus	Mammary	Holstein	NA	NA
ERR9846784	PRJEB53517	SAMEA110114480	Bos_taurus	Heart	Hereford	NA	NA
SRR10680308	PRJNA595394	SAMN13552811	Bos_taurus	Embryo	Holstein	NA	NA
SRR11053391	PRJNA605780	SAMN14078858	Bos_taurus	Embryo	NA	GSM4304912	NA
SRR11053360	PRJNA605780	SAMN14078833	Bos_taurus	Embryo	NA	GSM4304881	NA
SRR17608307	PRJNA797029	SAMN24962405	Bos_taurus	Embryo	NA	NA	NA
ERR9846807	PRJEB53517	SAMEA110114504	Bos_taurus	Muscle	Hereford	NA	NA
SRR22728355	PRJNA912081	SAMN32218611	Bos_taurus	Embryo	NA	NA	NA
SRR10887640	PRJNA601200	SAMN13859666	Bos_taurus	Embryo	NA	GSM4271536	NA
SRR10887628	PRJNA601200	SAMN13859681	Bos_taurus	Embryo	NA	GSM4271524	NA
SRR11053370	PRJNA605780	SAMN14078879	Bos_taurus	Embryo	NA	GSM4304891	NA
SRR9215187	PRJNA547776	SAMN11975857	Bos_taurus	Articular_chondrocytes	NA	NA	NA
SRR9733941	PRJNA555664	SAMN12327003	Bos_taurus	Muscle	Qinchuan	NA	NA
SRR22728351	PRJNA912081	SAMN32218607	Bos_taurus	Embryo	NA	NA	NA
SRR11053380	PRJNA605780	SAMN14078869	Bos_taurus	Embryo	NA	GSM4304901	NA
SRR11477022	PRJNA622966	SAMN14533687	Bos_taurus	Bronchial_lymph_node	Holstein-Friesian	GSM4453156	NA
ERR9846843	PRJEB53517	SAMEA110114543	Bos_taurus	Endometrium	Hereford	NA	NA
SRR17608304	PRJNA797029	SAMN24962402	Bos_taurus	Embryo	NA	NA	NA
SRR15652147	PRJNA758280	SAMN21019939	Bos_indicus	Hypothalamus	Brahman	GSM5542860	NA
ERR9846793	PRJEB53517	SAMEA110114490	Bos_taurus	kidney	Hereford	NA	NA
SRR15652155	PRJNA758280	SAMN21019947	Bos_indicus	Muscle	Brahman	GSM5542868	NA
SRR10887627	PRJNA601200	SAMN13859683	Bos_taurus	Embryo	NA	GSM4271523	NA
SRR11053339	PRJNA605780	SAMN14078854	Bos_taurus	Oocyte	NA	GSM4304860	NA
SRR11053379	PRJNA605780	SAMN14078870	Bos_taurus	Embryo	NA	GSM4304900	NA
SRR11053351	PRJNA605780	SAMN14078842	Bos_taurus	Embryo	NA	GSM4304872	NA
SRR9733936	PRJNA555664	SAMN12326998	Bos_taurus	Muscle	Qinchuan	NA	NA
SRR11053349	PRJNA605780	SAMN14078844	Bos_taurus	Embryo	NA	GSM4304870	NA
SRR11053356	PRJNA605780	SAMN14078837	Bos_taurus	Embryo	NA	GSM4304877	NA
SRR15291893	PRJNA750519	SAMN20462626	Bos_taurus	Skin	Holstein	NA	NA
SRR11477017	PRJNA622966	SAMN14533657	Bos_taurus	Bronchial_lymph_node	Holstein-Friesian	GSM4453151	NA
SRR9733942	PRJNA555664	SAMN12327004	Bos_taurus	Muscle	Qinchuan	NA	NA
SRR11688213	PRJNA601200	SAMN14836332	Bos_taurus	Embryo	NA	GSM4516361	NA
ERR9846775	PRJEB53517	SAMEA110114471	Bos_taurus	Liver	Hereford	NA	NA
SRR11053336	PRJNA605780	SAMN14078857	Bos_taurus	Oocyte	NA	GSM4304857	NA
ERR9846798	PRJEB53517	SAMEA110114495	Bos_taurus	Mammary	Holstein	NA	NA
SRR10887629	PRJNA601200	SAMN13859680	Bos_taurus	Embryo	NA	GSM4271525	NA
SRR11053372	PRJNA605780	SAMN14078877	Bos_taurus	Embryo	NA	GSM4304893	NA
ERR9846771	PRJEB53517	SAMEA110114467	Bos_taurus	Heart	Hereford	NA	NA
SRR15291909	PRJNA750519	SAMN20462631	Bos_taurus	Skin	Holstein	NA	NA
ERR9846825	PRJEB53517	SAMEA110114524	Bos_taurus	Adipose	Hereford	NA	NA
SRR10887630	PRJNA601200	SAMN13859678	Bos_taurus	Embryo	NA	GSM4271526	NA
ERR9846794	PRJEB53517	SAMEA110114491	Bos_taurus	kidney	Hereford	NA	NA
SRR11477020	PRJNA622966	SAMN14533653	Bos_taurus	Bronchial_lymph_node	Holstein-Friesian	GSM4453154	NA
SRR10680295	PRJNA595394	SAMN13552829	Bos_taurus	Embryo	Holstein	NA	NA
SRR11053374	PRJNA605780	SAMN14078875	Bos_taurus	Embryo	NA	GSM4304895	NA
ERR9846779	PRJEB53517	SAMEA110114475	Bos_taurus	Spleen	Hereford	NA	NA
SRR11477027	PRJNA622966	SAMN14533683	Bos_taurus	Bronchial_lymph_node	Holstein-Friesian	GSM4453161	NA
SRR11053366	PRJNA605780	SAMN14078883	Bos_taurus	Embryo	NA	GSM4304887	NA
SRR22728353	PRJNA912081	SAMN32218609	Bos_taurus	Embryo	NA	NA	NA
SRR17608306	PRJNA797029	SAMN24962404	Bos_taurus	Embryo	NA	NA	NA
SRR11053369	PRJNA605780	SAMN14078880	Bos_taurus	Embryo	NA	GSM4304890	NA
SRR11053382	PRJNA605780	SAMN14078867	Bos_taurus	Embryo	NA	GSM4304903	NA
SRR22728350	PRJNA912081	SAMN32218606	Bos_taurus	Embryo	NA	NA	NA
SRR11053355	PRJNA605780	SAMN14078838	Bos_taurus	Embryo	NA	GSM4304876	NA
ERR9846745	PRJEB53517	SAMEA110114440	Bos_taurus	Adipose	Hereford	NA	NA
SRR11053337	PRJNA605780	SAMN14078856	Bos_taurus	Oocyte	NA	GSM4304858	NA
SRR10887634	PRJNA601200	SAMN13859674	Bos_taurus	Embryo	NA	GSM4271530	NA
SRR11053363	PRJNA605780	SAMN14078886	Bos_taurus	Embryo	NA	GSM4304884	NA
SRR11053385	PRJNA605780	SAMN14078864	Bos_taurus	Embryo	NA	GSM4304906	NA
SRR10680317	PRJNA595394	SAMN13552808	Bos_taurus	Oocyte	Holstein	NA	NA
SRR15652150	PRJNA758280	SAMN21019942	Bos_indicus	Hypothalamus	Brahman	GSM5542863	NA
SRR9733933	PRJNA555664	SAMN12326995	Bos_taurus	Muscle	Qinchuan	NA	NA
SRR9733937	PRJNA555664	SAMN12326999	Bos_taurus	Muscle	Qinchuan	NA	NA
SRR11477023	PRJNA622966	SAMN14533686	Bos_taurus	Bronchial_lymph_node	Holstein-Friesian	GSM4453157	NA
SRR10680303	PRJNA595394	SAMN13552816	Bos_taurus	Embryo	Holstein	NA	NA
SRR10887638	PRJNA601200	SAMN13859669	Bos_taurus	Oocyte	NA	GSM4271534	NA
SRR16129043	PRJNA767621	SAMN21917071	Bos_taurus	MDBK	NA	NA	NA
SRR22071403	PRJNA894119	SAMN31438016	Bos_grunniens	Testes	NA	NA	NA
SRR15652148	PRJNA758280	SAMN21019940	Bos_indicus	Liver	Brahman	GSM5542861	NA
SRR9215184	PRJNA547776	SAMN11975863	Bos_taurus	Articular_chondrocytes	NA	NA	NA
ERR9846804	PRJEB53517	SAMEA110114501	Bos_taurus	Mammary	Holstein	NA	NA
ERR9846806	PRJEB53517	SAMEA110114503	Bos_taurus	Mammary	Holstein	NA	NA
SRR15291890	PRJNA750519	SAMN20462629	Bos_taurus	Skin	Holstein	NA	NA
SRR11053352	PRJNA605780	SAMN14078841	Bos_taurus	Embryo	NA	GSM4304873	NA
ERR9846846	PRJEB53517	SAMEA110114546	Bos_taurus	Mammary	Hereford	NA	NA
SRR10887623	PRJNA601200	SAMN13859687	Bos_taurus	Embryo	NA	GSM4271519	NA
SRR11477013	PRJNA622966	SAMN14533661	Bos_taurus	Bronchial_lymph_node	Holstein-Friesian	GSM4453147	NA
SRR9733930	PRJNA555664	SAMN12327005	Bos_taurus	Muscle	Qinchuan	NA	NA
SRR11053347	PRJNA605780	SAMN14078846	Bos_taurus	Embryo	NA	GSM4304868	NA
SRR22728354	PRJNA912081	SAMN32218610	Bos_taurus	Embryo	NA	NA	NA
SRR11053357	PRJNA605780	SAMN14078836	Bos_taurus	Embryo	NA	GSM4304878	NA
ERR9846778	PRJEB53517	SAMEA110114474	Bos_taurus	Spleen	Hereford	NA	NA
SRR22728352	PRJNA912081	SAMN32218608	Bos_taurus	Embryo	NA	NA	NA
ERR3281594	PRJEB32193	SAMEA5568454	Bos_taurus	Aorta_endothelium	NA	NA	NA
SRR10680305	PRJNA595394	SAMN13552814	Bos_taurus	Embryo	Holstein	NA	NA
ERR9846811	PRJEB53517	SAMEA110114508	Bos_taurus	Muscle	Hereford	NA	NA
SRR15291891	PRJNA750519	SAMN20462628	Bos_taurus	Skin	Holstein	NA	NA
SRR10680298	PRJNA595394	SAMN13552827	Bos_taurus	Embryo	Holstein	NA	NA
ERR9846841	PRJEB53517	SAMEA110114541	Bos_taurus	Endometrium	Hereford	NA	NA
SRR11053371	PRJNA605780	SAMN14078878	Bos_taurus	Embryo	NA	GSM4304892	NA
SRR11477028	PRJNA622966	SAMN14533682	Bos_taurus	Bronchial_lymph_node	Holstein-Friesian	GSM4453162	NA
ERR9846795	PRJEB53517	SAMEA110114492	Bos_taurus	Mammary	Holstein	NA	NA
SRR11053364	PRJNA605780	SAMN14078885	Bos_taurus	Embryo	NA	GSM4304885	NA
ERR9846770	PRJEB53517	SAMEA110114466	Bos_taurus	Heart	Hereford	NA	NA
SRR17608311	PRJNA797029	SAMN24962409	Bos_taurus	Embryo	NA	NA	NA
SRR10680304	PRJNA595394	SAMN13552815	Bos_taurus	Embryo	Holstein	NA	NA
SRR11053367	PRJNA605780	SAMN14078882	Bos_taurus	Embryo	NA	GSM4304888	NA
SRR11477021	PRJNA622966	SAMN14533688	Bos_taurus	Bronchial_lymph_node	Holstein-Friesian	GSM4453155	NA
SRR15652153	PRJNA758280	SAMN21019945	Bos_indicus	Hypothalamus	Brahman	GSM5542866	NA
SRR9733940	PRJNA555664	SAMN12327002	Bos_taurus	Muscle	Qinchuan	NA	NA
ERR9846845	PRJEB53517	SAMEA110114545	Bos_taurus	Mammary	Hereford	NA	NA
SRR11053378	PRJNA605780	SAMN14078871	Bos_taurus	Embryo	NA	GSM4304899	NA
SRR12927128	PRJNA672996	SAMN16580587	Bos_taurus	Rumen	Hostein	NA	NA
SRR11053386	PRJNA605780	SAMN14078863	Bos_taurus	Embryo	NA	GSM4304907	NA
SRR11053342	PRJNA605780	SAMN14078851	Bos_taurus	Oocyte	NA	GSM4304863	NA
SRR11053361	PRJNA605780	SAMN14078832	Bos_taurus	Embryo	NA	GSM4304882	NA
SRR11688214	PRJNA601200	SAMN14836331	Bos_taurus	Embryo	NA	GSM4516362	NA
SRR22728349	PRJNA912081	SAMN32218605	Bos_taurus	Embryo	NA	NA	NA
SRR10680309	PRJNA595394	SAMN13552831	Bos_taurus	Embryo	Holstein	NA	NA
SRR10887631	PRJNA601200	SAMN13859677	Bos_taurus	Embryo	NA	GSM4271527	NA
SRR17608305	PRJNA797029	SAMN24962403	Bos_taurus	Embryo	NA	NA	NA
SRR15652149	PRJNA758280	SAMN21019941	Bos_indicus	Muscle	Brahman	GSM5542862	NA
SRR10680316	PRJNA595394	SAMN13552809	Bos_taurus	Oocyte	Holstein	NA	NA
SRR11053377	PRJNA605780	SAMN14078872	Bos_taurus	Embryo	NA	GSM4304898	NA
SRR15652154	PRJNA758280	SAMN21019946	Bos_indicus	Liver	Brahman	GSM5542867	NA
SRR10887622	PRJNA601200	SAMN13859689	Bos_taurus	Embryo	NA	GSM4271518	NA
SRR11053341	PRJNA605780	SAMN14078852	Bos_taurus	Oocyte	NA	GSM4304862	NA
ERR9846799	PRJEB53517	SAMEA110114496	Bos_taurus	Mammary	Holstein	NA	NA
SRR10887635	PRJNA601200	SAMN13859672	Bos_taurus	Embryo	NA	GSM4271531	NA
ERR9846826	PRJEB53517	SAMEA110114525	Bos_taurus	Adipose	Hereford	NA	NA
SRR10680302	PRJNA595394	SAMN13552817	Bos_taurus	Embryo	Holstein	NA	NA
ERR9846805	PRJEB53517	SAMEA110114502	Bos_taurus	Mammary	Holstein	NA	NA
ERR9846809	PRJEB53517	SAMEA110114506	Bos_taurus	Muscle	Hereford	NA	NA
SRR12927109	PRJNA672996	SAMN16580585	Bos_taurus	Rumen	Hostein	NA	NA
SRR9733938	PRJNA555664	SAMN12327000	Bos_taurus	Muscle	Qinchuan	NA	NA
SRR11053390	PRJNA605780	SAMN14078859	Bos_taurus	Embryo	NA	GSM4304911	NA
ERR9846842	PRJEB53517	SAMEA110114542	Bos_taurus	Endometrium	Hereford	NA	NA
SRR16129042	PRJNA767621	SAMN21917070	Bos_taurus	MDBK	NA	NA	NA
SRR9733931	PRJNA555664	SAMN12327006	Bos_taurus	Muscle	Qinchuan	NA	NA
SRR11053362	PRJNA605780	SAMN14078830	Bos_taurus	Embryo	NA	GSM4304883	NA
SRR10887639	PRJNA601200	SAMN13859668	Bos_taurus	Embryo	NA	GSM4271535	NA
ERR9846774	PRJEB53517	SAMEA110114470	Bos_taurus	Liver	Hereford	NA	NA
SRR10680299	PRJNA595394	SAMN13552826	Bos_taurus	Embryo	Holstein	NA	NA
SRR11477018	PRJNA622966	SAMN14533656	Bos_taurus	Bronchial_lymph_node	Holstein-Friesian	GSM4453152	NA
SRR11477024	PRJNA622966	SAMN14533655	Bos_taurus	Bronchial_lymph_node	Holstein-Friesian	GSM4453158	NA
SRR10887620	PRJNA601200	SAMN13859691	Bos_taurus	Embryo	NA	GSM4271516	NA
ERR9846796	PRJEB53517	SAMEA110114493	Bos_taurus	Mammary	Holstein	NA	NA
SRR10680294	PRJNA595394	SAMN13552830	Bos_taurus	Embryo	Holstein	NA	NA
SRR11053345	PRJNA605780	SAMN14078848	Bos_taurus	Oocyte	NA	GSM4304866	NA
SRR11477014	PRJNA622966	SAMN14533660	Bos_taurus	Bronchial_lymph_node	Holstein-Friesian	GSM4453148	NA
SRR22071401	PRJNA894119	SAMN31438018	Bos_grunniens	Testes	NA	NA	NA
SRR10887626	PRJNA601200	SAMN13859684	Bos_taurus	Embryo	NA	GSM4271522	NA
SRR11053358	PRJNA605780	SAMN14078835	Bos_taurus	Embryo	NA	GSM4304879	NA
SRR11053383	PRJNA605780	SAMN14078866	Bos_taurus	Embryo	NA	GSM4304904	NA
ERR9846810	PRJEB53517	SAMEA110114507	Bos_taurus	Muscle	Hereford	NA	NA
ERR9846800	PRJEB53517	SAMEA110114497	Bos_taurus	Liver	Hereford	NA	NA
SRR9733932	PRJNA555664	SAMN12327007	Bos_taurus	Muscle	Qinchuan	NA	NA
SRR10680297	PRJNA595394	SAMN13552810	Bos_taurus	Oocyte	Holstein	NA	NA
SRR22728348	PRJNA912081	SAMN32218604	Bos_taurus	Embryo	NA	NA	NA
SRR9215186	PRJNA547776	SAMN11975858	Bos_taurus	Articular_chondrocytes	NA	NA	NA
ERR3281600	PRJEB32193	SAMEA5568460	Bos_taurus	Aorta_endothelium	NA	NA	NA
SRR11688216	PRJNA601200	SAMN14836329	Bos_taurus	Embryonic_stem_cells	NA	GSM4516364	NA
SRR11477029	PRJNA622966	SAMN14533681	Bos_taurus	Bronchial_lymph_node	Holstein-Friesian	GSM4453163	NA
SRR16129040	PRJNA767621	SAMN21917068	Bos_taurus	MDBK	NA	NA	NA
SRR11053353	PRJNA605780	SAMN14078840	Bos_taurus	Embryo	NA	GSM4304874	NA
ERR9846844	PRJEB53517	SAMEA110114544	Bos_taurus	Endometrium	Hereford	NA	NA
SRR17608309	PRJNA797029	SAMN24962407	Bos_taurus	Embryo	NA	NA	NA
SRR9215185	PRJNA547776	SAMN11975859	Bos_taurus	Articular_chondrocytes	NA	NA	NA
SRR10887641	PRJNA601200	SAMN13859665	Bos_taurus	Embryo	NA	GSM4271537	NA
SRR11053365	PRJNA605780	SAMN14078884	Bos_taurus	Embryo	NA	GSM4304886	NA
SRR10887625	PRJNA601200	SAMN13859685	Bos_taurus	Embryo	NA	GSM4271521	NA
SRR10680306	PRJNA595394	SAMN13552813	Bos_taurus	Embryo	Holstein	NA	NA
SRR22728346	PRJNA912081	SAMN32218602	Bos_taurus	Embryo	NA	NA	NA
SRR9733934	PRJNA555664	SAMN12326996	Bos_taurus	Muscle	Qinchuan	NA	NA
SRR10887632	PRJNA601200	SAMN13859676	Bos_taurus	Embryo	NA	GSM4271528	NA
SRR10680315	PRJNA595394	SAMN13552818	Bos_taurus	Embryo	Holstein	NA	NA
SRR11477026	PRJNA622966	SAMN14533684	Bos_taurus	Bronchial_lymph_node	Holstein-Friesian	GSM4453160	NA
SRR15291892	PRJNA750519	SAMN20462627	Bos_taurus	Skin	Holstein	NA	NA
SRR16129041	PRJNA767621	SAMN21917069	Bos_taurus	MDBK	NA	NA	NA
SRR10680312	PRJNA595394	SAMN13552821	Bos_taurus	Embryo	Holstein	NA	NA
SRR10680301	PRJNA595394	SAMN13552824	Bos_taurus	Embryo	Holstein	NA	NA
SRR11053388	PRJNA605780	SAMN14078861	Bos_taurus	Embryo	NA	GSM4304909	NA
SRR10887619	PRJNA601200	SAMN13859692	Bos_taurus	Embryo	NA	GSM4271515	NA
SRR15652152	PRJNA758280	SAMN21019944	Bos_indicus	Muscle	Brahman	GSM5542865	NA
SRR11477019	PRJNA622966	SAMN14533654	Bos_taurus	Bronchial_lymph_node	Holstein-Friesian	GSM4453153	NA
SRR15291889	PRJNA750519	SAMN20462630	Bos_taurus	Skin	Holstein	NA	NA
ERR9846773	PRJEB53517	SAMEA110114469	Bos_taurus	kidney	Hereford	NA	NA
SRR11053387	PRJNA605780	SAMN14078862	Bos_taurus	Embryo	NA	GSM4304908	NA
SRR9733939	PRJNA555664	SAMN12327001	Bos_taurus	Muscle	Qinchuan	NA	NA
SRR11053354	PRJNA605780	SAMN14078839	Bos_taurus	Embryo	NA	GSM4304875	NA
SRR11053376	PRJNA605780	SAMN14078873	Bos_taurus	Embryo	NA	GSM4304897	NA
ERR9846785	PRJEB53517	SAMEA110114481	Bos_taurus	Heart	Hereford	NA	NA
ERR9846797	PRJEB53517	SAMEA110114494	Bos_taurus	Mammary	Holstein	NA	NA
ERR3281601	PRJEB32193	SAMEA5568461	Bos_taurus	Aorta_endothelium	NA	NA	NA
SRR17608308	PRJNA797029	SAMN24962406	Bos_taurus	Embryo	NA	NA	NA
SRR11688215	PRJNA601200	SAMN14836330	Bos_taurus	Embryonic_stem_cells	NA	GSM4516363	NA
SRR11053350	PRJNA605780	SAMN14078843	Bos_taurus	Embryo	NA	GSM4304871	NA
SRR11053344	PRJNA605780	SAMN14078849	Bos_taurus	Oocyte	NA	GSM4304865	NA
SRR10680311	PRJNA595394	SAMN13552822	Bos_taurus	Embryo	Holstein	NA	NA
SRR10887621	PRJNA601200	SAMN13859690	Bos_taurus	Embryo	NA	GSM4271517	NA
ERR9846747	PRJEB53517	SAMEA110114442	Bos_taurus	Adipose	Hereford	NA	NA
SRR22728357	PRJNA912081	SAMN32218613	Bos_taurus	Embryo	NA	NA	NA
SRR10887636	PRJNA601200	SAMN13859671	Bos_taurus	Oocyte	NA	GSM4271532	NA
ERR9846833	PRJEB53517	SAMEA110114532	Bos_taurus	Spleen	Hereford	NA	NA
SRR10887618	PRJNA601200	SAMN13859693	Bos_taurus	Embryo	NA	GSM4271514	NA
ERR9846808	PRJEB53517	SAMEA110114505	Bos_taurus	Muscle	Hereford	NA	NA
SRR17608303	PRJNA797029	SAMN24962401	Bos_taurus	Embryo	NA	NA	NA
ERR3281595	PRJEB32193	SAMEA5568455	Bos_taurus	Aorta_endothelium	NA	NA	NA
SRR11053381	PRJNA605780	SAMN14078868	Bos_taurus	Embryo	NA	GSM4304902	NA
SRR11053359	PRJNA605780	SAMN14078834	Bos_taurus	Embryo	NA	GSM4304880	NA
SRR11477025	PRJNA622966	SAMN14533685	Bos_taurus	Bronchial_lymph_node	Holstein-Friesian	GSM4453159	NA

## Sheet: Table S7
Run	BioProject	Biosample	Organism	Tissue	Antibody	Development Stage	Breed	Sex	Age
ERR4976838	PRJEB41939	SAMEA4447798	Bos_taurus	Kidney	CTCF	NA	NA	NA	NA
ERR4976839	PRJEB41939	SAMEA4447798	Bos_taurus	Kidney	H3K27Me3	NA	NA	NA	NA
ERR4976840	PRJEB41939	SAMEA4447798	Bos_taurus	Kidney	input	NA	NA	NA	NA
ERR4976841	PRJEB41939	SAMEA4447766	Bos_taurus	Lung	CTCF	NA	NA	NA	NA
ERR4976842	PRJEB41939	SAMEA4447766	Bos_taurus	Lung	H3K27Me3	NA	NA	NA	NA
ERR4976843	PRJEB41939	SAMEA4447766	Bos_taurus	Lung	input	NA	NA	NA	NA
ERR4976844	PRJEB41939	SAMEA4447765	Bos_taurus	Kidney	CTCF	NA	NA	NA	NA
ERR4976845	PRJEB41939	SAMEA4447765	Bos_taurus	Kidney	H3K27Me3	NA	NA	NA	NA
ERR4976846	PRJEB41939	SAMEA4447765	Bos_taurus	Kidney	input	NA	NA	NA	NA
ERR4976847	PRJEB41939	SAMEA4447767	Bos_taurus	Lung	CTCF	NA	NA	NA	NA
ERR4976848	PRJEB41939	SAMEA4447767	Bos_taurus	Lung	H3K27Me3	NA	NA	NA	NA
ERR4976849	PRJEB41939	SAMEA4447767	Bos_taurus	Lung	input	NA	NA	NA	NA
ERR4976850	PRJEB41939	SAMEA4675151	Bos_taurus	Heart	CTCF	NA	NA	NA	NA
ERR4976851	PRJEB41939	SAMEA4675151	Bos_taurus	Heart	H3K27ac	NA	NA	NA	NA
ERR4976852	PRJEB41939	SAMEA4675151	Bos_taurus	Heart	input	NA	NA	NA	NA
ERR4976853	PRJEB41939	SAMEA4447798	Bos_taurus	Kidney	CTCF	NA	NA	NA	NA
ERR4976854	PRJEB41939	SAMEA4447798	Bos_taurus	Kidney	CTCF	NA	NA	NA	NA
ERR4976855	PRJEB41939	SAMEA4447798	Bos_taurus	Kidney	CTCF	NA	NA	NA	NA
ERR4976856	PRJEB41939	SAMEA4447798	Bos_taurus	Kidney	CTCF	NA	NA	NA	NA
ERR4976857	PRJEB41939	SAMEA4447798	Bos_taurus	Kidney	H3K27Me3	NA	NA	NA	NA
ERR4976858	PRJEB41939	SAMEA4447798	Bos_taurus	Kidney	H3K27Me3	NA	NA	NA	NA
ERR4976859	PRJEB41939	SAMEA4447798	Bos_taurus	Kidney	H3K27Me3	NA	NA	NA	NA
ERR4976860	PRJEB41939	SAMEA4447798	Bos_taurus	Kidney	H3K27Me3	NA	NA	NA	NA
ERR4976861	PRJEB41939	SAMEA4447798	Bos_taurus	Kidney	input	NA	NA	NA	NA
ERR4976862	PRJEB41939	SAMEA4447798	Bos_taurus	Kidney	input	NA	NA	NA	NA
ERR4976863	PRJEB41939	SAMEA4447798	Bos_taurus	Kidney	input	NA	NA	NA	NA
ERR4976864	PRJEB41939	SAMEA4447798	Bos_taurus	Kidney	input	NA	NA	NA	NA
ERR4976865	PRJEB41939	SAMEA4447766	Bos_taurus	Lung	CTCF	NA	NA	NA	NA
ERR4976866	PRJEB41939	SAMEA4447766	Bos_taurus	Lung	CTCF	NA	NA	NA	NA
ERR4976867	PRJEB41939	SAMEA4447766	Bos_taurus	Lung	CTCF	NA	NA	NA	NA
ERR4976868	PRJEB41939	SAMEA4447766	Bos_taurus	Lung	CTCF	NA	NA	NA	NA
ERR4976869	PRJEB41939	SAMEA4447766	Bos_taurus	Lung	H3K27Me3	NA	NA	NA	NA
ERR4976870	PRJEB41939	SAMEA4447766	Bos_taurus	Lung	H3K27Me3	NA	NA	NA	NA
ERR4976871	PRJEB41939	SAMEA4447766	Bos_taurus	Lung	H3K27Me3	NA	NA	NA	NA
ERR4976872	PRJEB41939	SAMEA4447766	Bos_taurus	Lung	H3K27Me3	NA	NA	NA	NA
ERR4976873	PRJEB41939	SAMEA4447766	Bos_taurus	Lung	input	NA	NA	NA	NA
ERR4976874	PRJEB41939	SAMEA4447766	Bos_taurus	Lung	input	NA	NA	NA	NA
ERR4976875	PRJEB41939	SAMEA4447766	Bos_taurus	Lung	input	NA	NA	NA	NA
ERR4976876	PRJEB41939	SAMEA4447766	Bos_taurus	Lung	input	NA	NA	NA	NA
ERR4976877	PRJEB41939	SAMEA4447765	Bos_taurus	Kidney	CTCF	NA	NA	NA	NA
ERR4976878	PRJEB41939	SAMEA4447765	Bos_taurus	Kidney	CTCF	NA	NA	NA	NA
ERR4976879	PRJEB41939	SAMEA4447765	Bos_taurus	Kidney	CTCF	NA	NA	NA	NA
ERR4976880	PRJEB41939	SAMEA4447765	Bos_taurus	Kidney	CTCF	NA	NA	NA	NA
ERR4976881	PRJEB41939	SAMEA4447765	Bos_taurus	Kidney	H3K27Me3	NA	NA	NA	NA
ERR4976882	PRJEB41939	SAMEA4447765	Bos_taurus	Kidney	H3K27Me3	NA	NA	NA	NA
ERR4976883	PRJEB41939	SAMEA4447765	Bos_taurus	Kidney	H3K27Me3	NA	NA	NA	NA
ERR4976884	PRJEB41939	SAMEA4447765	Bos_taurus	Kidney	H3K27Me3	NA	NA	NA	NA
ERR4976885	PRJEB41939	SAMEA4447765	Bos_taurus	Kidney	input	NA	NA	NA	NA
ERR4976886	PRJEB41939	SAMEA4447765	Bos_taurus	Kidney	input	NA	NA	NA	NA
ERR4976887	PRJEB41939	SAMEA4447765	Bos_taurus	Kidney	input	NA	NA	NA	NA
ERR4976888	PRJEB41939	SAMEA4447765	Bos_taurus	Kidney	input	NA	NA	NA	NA
ERR4976889	PRJEB41939	SAMEA4447767	Bos_taurus	Lung	CTCF	NA	NA	NA	NA
ERR4976890	PRJEB41939	SAMEA4447767	Bos_taurus	Lung	CTCF	NA	NA	NA	NA
ERR4976891	PRJEB41939	SAMEA4447767	Bos_taurus	Lung	CTCF	NA	NA	NA	NA
ERR4976892	PRJEB41939	SAMEA4447767	Bos_taurus	Lung	CTCF	NA	NA	NA	NA
ERR4976893	PRJEB41939	SAMEA4447767	Bos_taurus	Lung	H3K27Me3	NA	NA	NA	NA
ERR4976894	PRJEB41939	SAMEA4447767	Bos_taurus	Lung	H3K27Me3	NA	NA	NA	NA
ERR4976895	PRJEB41939	SAMEA4447767	Bos_taurus	Lung	H3K27Me3	NA	NA	NA	NA
ERR4976896	PRJEB41939	SAMEA4447767	Bos_taurus	Lung	H3K27Me3	NA	NA	NA	NA
ERR4976897	PRJEB41939	SAMEA4447767	Bos_taurus	Lung	input	NA	NA	NA	NA
ERR4976898	PRJEB41939	SAMEA4447767	Bos_taurus	Lung	input	NA	NA	NA	NA
ERR4976899	PRJEB41939	SAMEA4447767	Bos_taurus	Lung	input	NA	NA	NA	NA
ERR4976900	PRJEB41939	SAMEA4447767	Bos_taurus	Lung	input	NA	NA	NA	NA
ERR4976901	PRJEB41939	SAMEA4675151	Bos_taurus	Heart	CTCF	NA	NA	NA	NA
ERR4976902	PRJEB41939	SAMEA4675151	Bos_taurus	Heart	CTCF	NA	NA	NA	NA
ERR4976903	PRJEB41939	SAMEA4675151	Bos_taurus	Heart	CTCF	NA	NA	NA	NA
ERR4976904	PRJEB41939	SAMEA4675151	Bos_taurus	Heart	CTCF	NA	NA	NA	NA
ERR4976905	PRJEB41939	SAMEA4675151	Bos_taurus	Heart	H3K27ac	NA	NA	NA	NA
ERR4976906	PRJEB41939	SAMEA4675151	Bos_taurus	Heart	H3K27ac	NA	NA	NA	NA
ERR4976907	PRJEB41939	SAMEA4675151	Bos_taurus	Heart	H3K27ac	NA	NA	NA	NA
ERR4976908	PRJEB41939	SAMEA4675151	Bos_taurus	Heart	H3K27ac	NA	NA	NA	NA
ERR4976909	PRJEB41939	SAMEA4675151	Bos_taurus	Heart	input	NA	NA	NA	NA
ERR4976910	PRJEB41939	SAMEA4675151	Bos_taurus	Heart	input	NA	NA	NA	NA
ERR4976911	PRJEB41939	SAMEA4675151	Bos_taurus	Heart	input	NA	NA	NA	NA
ERR4976912	PRJEB41939	SAMEA4675151	Bos_taurus	Heart	input	NA	NA	NA	NA
ERR4976913	PRJEB41939	SAMEA4675143	Bos_taurus	Liver	H3K27ac	NA	NA	NA	NA
ERR4976914	PRJEB41939	SAMEA4675143	Bos_taurus	Liver	H3K27ac	NA	NA	NA	NA
ERR4976915	PRJEB41939	SAMEA4675143	Bos_taurus	Liver	H3K27ac	NA	NA	NA	NA
ERR4976916	PRJEB41939	SAMEA4675150	Bos_taurus	Mammary	H3K4Me1	NA	NA	NA	NA
ERR4976917	PRJEB41939	SAMEA4675150	Bos_taurus	Mammary	H3K4Me1	NA	NA	NA	NA
ERR4976918	PRJEB41939	SAMEA4675150	Bos_taurus	Mammary	H3K4Me1	NA	NA	NA	NA
ERR4976919	PRJEB41939	SAMEA4447801	Bos_taurus	Heart	H3K27ac	NA	NA	NA	NA
ERR4976920	PRJEB41939	SAMEA4447801	Bos_taurus	Heart	input	NA	NA	NA	NA
ERR4976921	PRJEB41939	SAMEA4447809	Bos_taurus	Heart	H3K27ac	NA	NA	NA	NA
ERR4976922	PRJEB41939	SAMEA4447809	Bos_taurus	Heart	input	NA	NA	NA	NA
ERR4976923	PRJEB41939	SAMEA4447802	Bos_taurus	Spleen	H3K27Me3	NA	NA	NA	NA
ERR4976924	PRJEB41939	SAMEA4447802	Bos_taurus	Spleen	input	NA	NA	NA	NA
ERR4976925	PRJEB41939	SAMEA4447806	Bos_taurus	Spleen	H3K27Me3	NA	NA	NA	NA
ERR4976926	PRJEB41939	SAMEA4447806	Bos_taurus	Spleen	input	NA	NA	NA	NA
ERR4976927	PRJEB41939	SAMEA4675151	Bos_taurus	Heart	H3K27Me3	NA	NA	NA	NA
ERR4976928	PRJEB41939	SAMEA4675151	Bos_taurus	Heart	input	NA	NA	NA	NA
ERR4976929	PRJEB41939	SAMEA4675145	Bos_taurus	Spleen	H3K27Me3	NA	NA	NA	NA
ERR4976930	PRJEB41939	SAMEA4675145	Bos_taurus	Spleen	input	NA	NA	NA	NA
ERR4976931	PRJEB41939	SAMEA4447801	Bos_taurus	Heart	H3K27ac	NA	NA	NA	NA
ERR4976932	PRJEB41939	SAMEA4447801	Bos_taurus	Heart	H3K27ac	NA	NA	NA	NA
ERR4976933	PRJEB41939	SAMEA4447801	Bos_taurus	Heart	input	NA	NA	NA	NA
ERR4976934	PRJEB41939	SAMEA4447801	Bos_taurus	Heart	input	NA	NA	NA	NA
ERR4976935	PRJEB41939	SAMEA4447809	Bos_taurus	Heart	H3K27ac	NA	NA	NA	NA
ERR4976936	PRJEB41939	SAMEA4447809	Bos_taurus	Heart	H3K27ac	NA	NA	NA	NA
ERR4976937	PRJEB41939	SAMEA4447809	Bos_taurus	Heart	input	NA	NA	NA	NA
ERR4976938	PRJEB41939	SAMEA4447809	Bos_taurus	Heart	input	NA	NA	NA	NA
ERR4976939	PRJEB41939	SAMEA4447801	Bos_taurus	Heart	H3K27ac	NA	NA	NA	NA
ERR4976940	PRJEB41939	SAMEA4447801	Bos_taurus	Heart	input	NA	NA	NA	NA
ERR4976941	PRJEB41939	SAMEA4447809	Bos_taurus	Heart	H3K27ac	NA	NA	NA	NA
ERR4976942	PRJEB41939	SAMEA4447809	Bos_taurus	Heart	input	NA	NA	NA	NA
ERR4976943	PRJEB41939	SAMEA4447802	Bos_taurus	Spleen	H3K27Me3	NA	NA	NA	NA
ERR4976944	PRJEB41939	SAMEA4447802	Bos_taurus	Spleen	input	NA	NA	NA	NA
ERR4976945	PRJEB41939	SAMEA4447806	Bos_taurus	Spleen	H3K27Me3	NA	NA	NA	NA
ERR4976946	PRJEB41939	SAMEA4447806	Bos_taurus	Spleen	input	NA	NA	NA	NA
ERR4976947	PRJEB41939	SAMEA4675142	Bos_taurus	Kidney	CTCF	NA	NA	NA	NA
ERR4976948	PRJEB41939	SAMEA4675142	Bos_taurus	Kidney	input	NA	NA	NA	NA
ERR4976949	PRJEB41939	SAMEA4675137	Bos_taurus	Lung	CTCF	NA	NA	NA	NA
ERR4976950	PRJEB41939	SAMEA4675137	Bos_taurus	Lung	input	NA	NA	NA	NA
ERR4976951	PRJEB41939	SAMEA4675151	Bos_taurus	Heart	H3K27Me3	NA	NA	NA	NA
ERR4976952	PRJEB41939	SAMEA4675151	Bos_taurus	Heart	input	NA	NA	NA	NA
ERR4976953	PRJEB41939	SAMEA4675145	Bos_taurus	Spleen	H3K27Me3	NA	NA	NA	NA
ERR4976954	PRJEB41939	SAMEA4675145	Bos_taurus	Spleen	input	NA	NA	NA	NA
ERR4976955	PRJEB41939	SAMEA4447787	Bos_taurus	Liver	CTCF	NA	NA	NA	NA
ERR4976956	PRJEB41939	SAMEA4447787	Bos_taurus	Liver	input	NA	NA	NA	NA
ERR4976957	PRJEB41939	SAMEA4447830	Bos_taurus	Mammary	CTCF	NA	NA	NA	NA
ERR4976958	PRJEB41939	SAMEA4447830	Bos_taurus	Mammary	input	NA	NA	NA	NA
ERR4976959	PRJEB41939	SAMEA4447830	Bos_taurus	Mammary	CTCF	NA	NA	NA	NA
ERR4976960	PRJEB41939	SAMEA4447830	Bos_taurus	Mammary	input	NA	NA	NA	NA
ERR4976961	PRJEB41939	SAMEA4447814	Bos_taurus	Liver	CTCF	NA	NA	NA	NA
ERR4976962	PRJEB41939	SAMEA4447814	Bos_taurus	Liver	input	NA	NA	NA	NA
ERR4976963	PRJEB41939	SAMEA4447762	Bos_taurus	Mammary	CTCF	NA	NA	NA	NA
ERR4976964	PRJEB41939	SAMEA4447762	Bos_taurus	Mammary	input	NA	NA	NA	NA
ERR4976965	PRJEB41939	SAMEA4675143	Bos_taurus	Liver	CTCF	NA	NA	NA	NA
ERR4976966	PRJEB41939	SAMEA4675143	Bos_taurus	Liver	input	NA	NA	NA	NA
ERR4976967	PRJEB41939	SAMEA4675150	Bos_taurus	Mammary	CTCF	NA	NA	NA	NA
ERR4976968	PRJEB41939	SAMEA4675150	Bos_taurus	Mammary	input	NA	NA	NA	NA
ERR4976969	PRJEB41939	SAMEA4447787	Bos_taurus	Liver	CTCF	NA	NA	NA	NA
ERR4976970	PRJEB41939	SAMEA4447787	Bos_taurus	Liver	CTCF	NA	NA	NA	NA
ERR4976971	PRJEB41939	SAMEA4447787	Bos_taurus	Liver	CTCF	NA	NA	NA	NA
ERR4976972	PRJEB41939	SAMEA4447787	Bos_taurus	Liver	input	NA	NA	NA	NA
ERR4976973	PRJEB41939	SAMEA4447787	Bos_taurus	Liver	input	NA	NA	NA	NA
ERR4976974	PRJEB41939	SAMEA4447787	Bos_taurus	Liver	input	NA	NA	NA	NA
ERR4976975	PRJEB41939	SAMEA4447830	Bos_taurus	Mammary	CTCF	NA	NA	NA	NA
ERR4976976	PRJEB41939	SAMEA4447830	Bos_taurus	Mammary	CTCF	NA	NA	NA	NA
ERR4976977	PRJEB41939	SAMEA4447830	Bos_taurus	Mammary	CTCF	NA	NA	NA	NA
ERR4976978	PRJEB41939	SAMEA4447830	Bos_taurus	Mammary	input	NA	NA	NA	NA
ERR4976979	PRJEB41939	SAMEA4447830	Bos_taurus	Mammary	input	NA	NA	NA	NA
ERR4976980	PRJEB41939	SAMEA4447830	Bos_taurus	Mammary	input	NA	NA	NA	NA
ERR4976981	PRJEB41939	SAMEA4447830	Bos_taurus	Mammary	CTCF	NA	NA	NA	NA
ERR4976982	PRJEB41939	SAMEA4447830	Bos_taurus	Mammary	CTCF	NA	NA	NA	NA
ERR4976983	PRJEB41939	SAMEA4447830	Bos_taurus	Mammary	CTCF	NA	NA	NA	NA
ERR4976984	PRJEB41939	SAMEA4447830	Bos_taurus	Mammary	input	NA	NA	NA	NA
ERR4976985	PRJEB41939	SAMEA4447830	Bos_taurus	Mammary	input	NA	NA	NA	NA
ERR4976986	PRJEB41939	SAMEA4447830	Bos_taurus	Mammary	input	NA	NA	NA	NA
ERR4976987	PRJEB41939	SAMEA4447814	Bos_taurus	Liver	CTCF	NA	NA	NA	NA
ERR4976988	PRJEB41939	SAMEA4447814	Bos_taurus	Liver	CTCF	NA	NA	NA	NA
ERR4976989	PRJEB41939	SAMEA4447814	Bos_taurus	Liver	CTCF	NA	NA	NA	NA
ERR4976990	PRJEB41939	SAMEA4447814	Bos_taurus	Liver	input	NA	NA	NA	NA
ERR4976991	PRJEB41939	SAMEA4447814	Bos_taurus	Liver	input	NA	NA	NA	NA
ERR4976992	PRJEB41939	SAMEA4447814	Bos_taurus	Liver	input	NA	NA	NA	NA
ERR4976993	PRJEB41939	SAMEA4447762	Bos_taurus	Mammary	CTCF	NA	NA	NA	NA
ERR4976994	PRJEB41939	SAMEA4447762	Bos_taurus	Mammary	CTCF	NA	NA	NA	NA
ERR4976995	PRJEB41939	SAMEA4447762	Bos_taurus	Mammary	CTCF	NA	NA	NA	NA
ERR4976996	PRJEB41939	SAMEA4447762	Bos_taurus	Mammary	input	NA	NA	NA	NA
ERR4976997	PRJEB41939	SAMEA4447762	Bos_taurus	Mammary	input	NA	NA	NA	NA
ERR4976998	PRJEB41939	SAMEA4447762	Bos_taurus	Mammary	input	NA	NA	NA	NA
ERR4976999	PRJEB41939	SAMEA4675143	Bos_taurus	Liver	CTCF	NA	NA	NA	NA
ERR4977000	PRJEB41939	SAMEA4675143	Bos_taurus	Liver	CTCF	NA	NA	NA	NA
ERR4977001	PRJEB41939	SAMEA4675143	Bos_taurus	Liver	CTCF	NA	NA	NA	NA
ERR4977002	PRJEB41939	SAMEA4675143	Bos_taurus	Liver	input	NA	NA	NA	NA
ERR4977003	PRJEB41939	SAMEA4675143	Bos_taurus	Liver	input	NA	NA	NA	NA
ERR4977004	PRJEB41939	SAMEA4675143	Bos_taurus	Liver	input	NA	NA	NA	NA
ERR4977005	PRJEB41939	SAMEA4675150	Bos_taurus	Mammary	CTCF	NA	NA	NA	NA
ERR4977006	PRJEB41939	SAMEA4675150	Bos_taurus	Mammary	CTCF	NA	NA	NA	NA
ERR4977007	PRJEB41939	SAMEA4675150	Bos_taurus	Mammary	CTCF	NA	NA	NA	NA
ERR4977008	PRJEB41939	SAMEA4675150	Bos_taurus	Mammary	input	NA	NA	NA	NA
ERR4977009	PRJEB41939	SAMEA4675150	Bos_taurus	Mammary	input	NA	NA	NA	NA
ERR4977010	PRJEB41939	SAMEA4675150	Bos_taurus	Mammary	input	NA	NA	NA	NA
ERR4977011	PRJEB41939	SAMEA4447787	Bos_taurus	Liver	CTCF	NA	NA	NA	NA
ERR4977012	PRJEB41939	SAMEA4447787	Bos_taurus	Liver	CTCF	NA	NA	NA	NA
ERR4977013	PRJEB41939	SAMEA4447787	Bos_taurus	Liver	CTCF	NA	NA	NA	NA
ERR4977014	PRJEB41939	SAMEA4447787	Bos_taurus	Liver	input	NA	NA	NA	NA
ERR4977015	PRJEB41939	SAMEA4447787	Bos_taurus	Liver	input	NA	NA	NA	NA
ERR4977016	PRJEB41939	SAMEA4447787	Bos_taurus	Liver	input	NA	NA	NA	NA
ERR4977017	PRJEB41939	SAMEA4447830	Bos_taurus	Mammary	CTCF	NA	NA	NA	NA
ERR4977018	PRJEB41939	SAMEA4447830	Bos_taurus	Mammary	CTCF	NA	NA	NA	NA
ERR4977019	PRJEB41939	SAMEA4447830	Bos_taurus	Mammary	CTCF	NA	NA	NA	NA
ERR4977020	PRJEB41939	SAMEA4447830	Bos_taurus	Mammary	input	NA	NA	NA	NA
ERR4977021	PRJEB41939	SAMEA4447830	Bos_taurus	Mammary	input	NA	NA	NA	NA
ERR4977022	PRJEB41939	SAMEA4447830	Bos_taurus	Mammary	input	NA	NA	NA	NA
ERR4977023	PRJEB41939	SAMEA4447830	Bos_taurus	Mammary	CTCF	NA	NA	NA	NA
ERR4977024	PRJEB41939	SAMEA4447830	Bos_taurus	Mammary	CTCF	NA	NA	NA	NA
ERR4977025	PRJEB41939	SAMEA4447830	Bos_taurus	Mammary	CTCF	NA	NA	NA	NA
ERR4977026	PRJEB41939	SAMEA4447830	Bos_taurus	Mammary	input	NA	NA	NA	NA
ERR4977027	PRJEB41939	SAMEA4447830	Bos_taurus	Mammary	input	NA	NA	NA	NA
ERR4977028	PRJEB41939	SAMEA4447830	Bos_taurus	Mammary	input	NA	NA	NA	NA
ERR4977029	PRJEB41939	SAMEA4447814	Bos_taurus	Liver	CTCF	NA	NA	NA	NA
ERR4977030	PRJEB41939	SAMEA4447814	Bos_taurus	Liver	CTCF	NA	NA	NA	NA
ERR4977031	PRJEB41939	SAMEA4447814	Bos_taurus	Liver	CTCF	NA	NA	NA	NA
ERR4977032	PRJEB41939	SAMEA4447814	Bos_taurus	Liver	input	NA	NA	NA	NA
ERR4977033	PRJEB41939	SAMEA4447814	Bos_taurus	Liver	input	NA	NA	NA	NA
ERR4977034	PRJEB41939	SAMEA4447814	Bos_taurus	Liver	input	NA	NA	NA	NA
ERR4977035	PRJEB41939	SAMEA4447762	Bos_taurus	Mammary	CTCF	NA	NA	NA	NA
ERR4977036	PRJEB41939	SAMEA4447762	Bos_taurus	Mammary	CTCF	NA	NA	NA	NA
ERR4977037	PRJEB41939	SAMEA4447762	Bos_taurus	Mammary	CTCF	NA	NA	NA	NA
ERR4977038	PRJEB41939	SAMEA4447762	Bos_taurus	Mammary	input	NA	NA	NA	NA
ERR4977039	PRJEB41939	SAMEA4447762	Bos_taurus	Mammary	input	NA	NA	NA	NA
ERR4977040	PRJEB41939	SAMEA4447762	Bos_taurus	Mammary	input	NA	NA	NA	NA
ERR4977041	PRJEB41939	SAMEA4675143	Bos_taurus	Liver	CTCF	NA	NA	NA	NA
ERR4977042	PRJEB41939	SAMEA4675143	Bos_taurus	Liver	CTCF	NA	NA	NA	NA
ERR4977043	PRJEB41939	SAMEA4675143	Bos_taurus	Liver	CTCF	NA	NA	NA	NA
ERR4977044	PRJEB41939	SAMEA4675143	Bos_taurus	Liver	input	NA	NA	NA	NA
ERR4977045	PRJEB41939	SAMEA4675143	Bos_taurus	Liver	input	NA	NA	NA	NA
ERR4977046	PRJEB41939	SAMEA4675143	Bos_taurus	Liver	input	NA	NA	NA	NA
ERR4977047	PRJEB41939	SAMEA4675150	Bos_taurus	Mammary	CTCF	NA	NA	NA	NA
ERR4977048	PRJEB41939	SAMEA4675150	Bos_taurus	Mammary	CTCF	NA	NA	NA	NA
ERR4977049	PRJEB41939	SAMEA4675150	Bos_taurus	Mammary	CTCF	NA	NA	NA	NA
ERR4977050	PRJEB41939	SAMEA4675150	Bos_taurus	Mammary	input	NA	NA	NA	NA
ERR4977051	PRJEB41939	SAMEA4675150	Bos_taurus	Mammary	input	NA	NA	NA	NA
ERR4977052	PRJEB41939	SAMEA4675150	Bos_taurus	Mammary	input	NA	NA	NA	NA
ERR4977053	PRJEB41939	SAMEA4447801	Bos_taurus	Heart	CTCF	NA	NA	NA	NA
ERR4977054	PRJEB41939	SAMEA4447801	Bos_taurus	Heart	H3K27Me3	NA	NA	NA	NA
ERR4977055	PRJEB41939	SAMEA4447801	Bos_taurus	Heart	H3K4Me1	NA	NA	NA	NA
ERR4977056	PRJEB41939	SAMEA4447801	Bos_taurus	Heart	H3K4Me3	NA	NA	NA	NA
ERR4977057	PRJEB41939	SAMEA4447801	Bos_taurus	Heart	input	NA	NA	NA	NA
ERR4977058	PRJEB41939	SAMEA4447809	Bos_taurus	Heart	CTCF	NA	NA	NA	NA
ERR4977059	PRJEB41939	SAMEA4447809	Bos_taurus	Heart	H3K27Me3	NA	NA	NA	NA
ERR4977060	PRJEB41939	SAMEA4447809	Bos_taurus	Heart	H3K4Me1	NA	NA	NA	NA
ERR4977061	PRJEB41939	SAMEA4447809	Bos_taurus	Heart	H3K4Me3	NA	NA	NA	NA
ERR4977062	PRJEB41939	SAMEA4447809	Bos_taurus	Heart	input	NA	NA	NA	NA
ERR4977063	PRJEB41939	SAMEA4447802	Bos_taurus	Spleen	H3K4Me1	NA	NA	NA	NA
ERR4977064	PRJEB41939	SAMEA4447801	Bos_taurus	Heart	CTCF	NA	NA	NA	NA
ERR4977065	PRJEB41939	SAMEA4447801	Bos_taurus	Heart	CTCF	NA	NA	NA	NA
ERR4977066	PRJEB41939	SAMEA4447801	Bos_taurus	Heart	CTCF	NA	NA	NA	NA
ERR4977067	PRJEB41939	SAMEA4447801	Bos_taurus	Heart	H3K27Me3	NA	NA	NA	NA
ERR4977068	PRJEB41939	SAMEA4447801	Bos_taurus	Heart	H3K27Me3	NA	NA	NA	NA
ERR4977069	PRJEB41939	SAMEA4447801	Bos_taurus	Heart	H3K27Me3	NA	NA	NA	NA
ERR4977070	PRJEB41939	SAMEA4447801	Bos_taurus	Heart	H3K4Me1	NA	NA	NA	NA
ERR4977071	PRJEB41939	SAMEA4447801	Bos_taurus	Heart	H3K4Me1	NA	NA	NA	NA
ERR4977072	PRJEB41939	SAMEA4447801	Bos_taurus	Heart	H3K4Me1	NA	NA	NA	NA
ERR4977073	PRJEB41939	SAMEA4447801	Bos_taurus	Heart	H3K4Me3	NA	NA	NA	NA
ERR4977074	PRJEB41939	SAMEA4447801	Bos_taurus	Heart	H3K4Me3	NA	NA	NA	NA
ERR4977075	PRJEB41939	SAMEA4447801	Bos_taurus	Heart	H3K4Me3	NA	NA	NA	NA
ERR4977076	PRJEB41939	SAMEA4447801	Bos_taurus	Heart	input	NA	NA	NA	NA
ERR4977077	PRJEB41939	SAMEA4447801	Bos_taurus	Heart	input	NA	NA	NA	NA
ERR4977078	PRJEB41939	SAMEA4447801	Bos_taurus	Heart	input	NA	NA	NA	NA
ERR4977079	PRJEB41939	SAMEA4447809	Bos_taurus	Heart	CTCF	NA	NA	NA	NA
ERR4977080	PRJEB41939	SAMEA4447809	Bos_taurus	Heart	CTCF	NA	NA	NA	NA
ERR4977081	PRJEB41939	SAMEA4447809	Bos_taurus	Heart	CTCF	NA	NA	NA	NA
ERR4977082	PRJEB41939	SAMEA4447809	Bos_taurus	Heart	H3K27Me3	NA	NA	NA	NA
ERR4977083	PRJEB41939	SAMEA4447809	Bos_taurus	Heart	H3K27Me3	NA	NA	NA	NA
ERR4977084	PRJEB41939	SAMEA4447809	Bos_taurus	Heart	H3K27Me3	NA	NA	NA	NA
ERR4977085	PRJEB41939	SAMEA4447809	Bos_taurus	Heart	H3K4Me1	NA	NA	NA	NA
ERR4977086	PRJEB41939	SAMEA4447809	Bos_taurus	Heart	H3K4Me1	NA	NA	NA	NA
ERR4977087	PRJEB41939	SAMEA4447809	Bos_taurus	Heart	H3K4Me1	NA	NA	NA	NA
ERR4977088	PRJEB41939	SAMEA4447809	Bos_taurus	Heart	H3K4Me3	NA	NA	NA	NA
ERR4977089	PRJEB41939	SAMEA4447809	Bos_taurus	Heart	H3K4Me3	NA	NA	NA	NA
ERR4977090	PRJEB41939	SAMEA4447809	Bos_taurus	Heart	H3K4Me3	NA	NA	NA	NA
ERR4977091	PRJEB41939	SAMEA4447809	Bos_taurus	Heart	input	NA	NA	NA	NA
ERR4977092	PRJEB41939	SAMEA4447809	Bos_taurus	Heart	input	NA	NA	NA	NA
ERR4977093	PRJEB41939	SAMEA4447809	Bos_taurus	Heart	input	NA	NA	NA	NA
ERR4977094	PRJEB41939	SAMEA4447806	Bos_taurus	Spleen	H3K4Me1	NA	NA	NA	NA
ERR4977095	PRJEB41939	SAMEA4675151	Bos_taurus	Heart	H3K4Me1	NA	NA	NA	NA
ERR4977096	PRJEB41939	SAMEA4675151	Bos_taurus	Heart	H3K4Me3	NA	NA	NA	NA
ERR4977097	PRJEB41939	SAMEA4675137	Bos_taurus	Lung	CTCF	NA	NA	NA	NA
ERR4977098	PRJEB41939	SAMEA4675145	Bos_taurus	Spleen	H3K4Me3	NA	NA	NA	NA
ERR4977099	PRJEB41939	SAMEA4675145	Bos_taurus	Spleen	input	NA	NA	NA	NA
ERR4977100	PRJEB41939	SAMEA4675145	Bos_taurus	Spleen	H3K4Me1	NA	NA	NA	NA
ERR4977101	PRJEB41939	SAMEA4675145	Bos_taurus	Spleen	input	NA	NA	NA	NA
ERR4977102	PRJEB41939	SAMEA4675150	Bos_taurus	Mammary	input	NA	NA	NA	NA
ERR4977103	PRJEB41939	SAMEA4675150	Bos_taurus	Mammary	input	NA	NA	NA	NA
ERR4977104	PRJEB41939	SAMEA4675151	Bos_taurus	Heart	H3K4Me1	NA	NA	NA	NA
ERR4977105	PRJEB41939	SAMEA4675151	Bos_taurus	Heart	H3K4Me3	NA	NA	NA	NA
ERR4977106	PRJEB41939	SAMEA4675151	Bos_taurus	Heart	input	NA	NA	NA	NA
ERR4977107	PRJEB41939	SAMEA4447762	Bos_taurus	Mammary	H3K4Me3	NA	NA	NA	NA
ERR4977108	PRJEB41939	SAMEA4447762	Bos_taurus	Mammary	input	NA	NA	NA	NA
ERR4977109	PRJEB41939	SAMEA4675143	Bos_taurus	Liver	H3K4Me3	NA	NA	NA	NA
ERR4977110	PRJEB41939	SAMEA4447762	Bos_taurus	Mammary	H3K4Me3	NA	NA	NA	NA
ERR4977111	PRJEB41939	SAMEA4447762	Bos_taurus	Mammary	input	NA	NA	NA	NA
ERR4977112	PRJEB41939	SAMEA4675143	Bos_taurus	Liver	H3K4Me3	NA	NA	NA	NA
ERR4977113	PRJEB41939	SAMEA4447787	Bos_taurus	Liver	H3K4Me3	NA	NA	NA	NA
ERR4977114	PRJEB41939	SAMEA4447787	Bos_taurus	Liver	H3K4Me3	NA	NA	NA	NA
ERR4977115	PRJEB41939	SAMEA4447787	Bos_taurus	Liver	input	NA	NA	NA	NA
ERR4977116	PRJEB41939	SAMEA4447787	Bos_taurus	Liver	input	NA	NA	NA	NA
ERR4977117	PRJEB41939	SAMEA4447830	Bos_taurus	Mammary	H3K4Me3	NA	NA	NA	NA
ERR4977118	PRJEB41939	SAMEA4447830	Bos_taurus	Mammary	H3K4Me3	NA	NA	NA	NA
ERR4977119	PRJEB41939	SAMEA4447830	Bos_taurus	Mammary	input	NA	NA	NA	NA
ERR4977120	PRJEB41939	SAMEA4447830	Bos_taurus	Mammary	input	NA	NA	NA	NA
ERR4977121	PRJEB41939	SAMEA4447814	Bos_taurus	Liver	H3K27ac	NA	NA	NA	NA
ERR4977122	PRJEB41939	SAMEA4447814	Bos_taurus	Liver	H3K27ac	NA	NA	NA	NA
ERR4977123	PRJEB41939	SAMEA4447814	Bos_taurus	Liver	H3K4Me1	NA	NA	NA	NA
ERR4977124	PRJEB41939	SAMEA4447814	Bos_taurus	Liver	H3K4Me1	NA	NA	NA	NA
ERR4977125	PRJEB41939	SAMEA4675150	Bos_taurus	Mammary	H3K4Me3	NA	NA	NA	NA
ERR4977126	PRJEB41939	SAMEA4675150	Bos_taurus	Mammary	H3K4Me3	NA	NA	NA	NA
ERR4977127	PRJEB41939	SAMEA4447762	Bos_taurus	Mammary	H3K27Me3	NA	NA	NA	NA
ERR4977128	PRJEB41939	SAMEA4675143	Bos_taurus	Liver	H3K27Me3	NA	NA	NA	NA
ERR4977129	PRJEB41939	SAMEA4675143	Bos_taurus	Liver	input	NA	NA	NA	NA
ERR4977130	PRJEB41939	SAMEA4447762	Bos_taurus	Mammary	H3K27ac	NA	NA	NA	NA
ERR4977131	PRJEB41939	SAMEA4447762	Bos_taurus	Mammary	H3K27ac	NA	NA	NA	NA
ERR4977132	PRJEB41939	SAMEA4447762	Bos_taurus	Mammary	H3K4Me1	NA	NA	NA	NA
ERR4977133	PRJEB41939	SAMEA4447762	Bos_taurus	Mammary	H3K4Me1	NA	NA	NA	NA
ERR4977134	PRJEB41939	SAMEA4447802	Bos_taurus	Spleen	H3K4Me1	NA	NA	NA	NA
ERR4977135	PRJEB41939	SAMEA4447802	Bos_taurus	Spleen	H3K4Me3	NA	NA	NA	NA
ERR4977136	PRJEB41939	SAMEA4447802	Bos_taurus	Spleen	input	NA	NA	NA	NA
ERR4977137	PRJEB41939	SAMEA4447806	Bos_taurus	Spleen	H3K4Me1	NA	NA	NA	NA
ERR4977138	PRJEB41939	SAMEA4447806	Bos_taurus	Spleen	H3K4Me3	NA	NA	NA	NA
ERR4977139	PRJEB41939	SAMEA4447806	Bos_taurus	Spleen	input	NA	NA	NA	NA
ERR4977140	PRJEB41939	SAMEA4675142	Bos_taurus	Kidney	H3K4Me1	NA	NA	NA	NA
ERR4977141	PRJEB41939	SAMEA4675142	Bos_taurus	Kidney	H3K4Me3	NA	NA	NA	NA
ERR4977142	PRJEB41939	SAMEA4675142	Bos_taurus	Kidney	input	NA	NA	NA	NA
ERR4977143	PRJEB41939	SAMEA4675137	Bos_taurus	Lung	H3K4Me1	NA	NA	NA	NA
ERR4977144	PRJEB41939	SAMEA4675137	Bos_taurus	Lung	H3K4Me3	NA	NA	NA	NA
ERR4977145	PRJEB41939	SAMEA4675137	Bos_taurus	Lung	input	NA	NA	NA	NA
ERR4977146	PRJEB41939	SAMEA4447787	Bos_taurus	Liver	H3K4Me3	NA	NA	NA	NA
ERR4977147	PRJEB41939	SAMEA4447787	Bos_taurus	Liver	input	NA	NA	NA	NA
ERR4977148	PRJEB41939	SAMEA4447830	Bos_taurus	Mammary	H3K4Me3	NA	NA	NA	NA
ERR4977149	PRJEB41939	SAMEA4447830	Bos_taurus	Mammary	input	NA	NA	NA	NA
ERR4977150	PRJEB41939	SAMEA4447830	Bos_taurus	Mammary	H3K4Me3	NA	NA	NA	NA
ERR4977151	PRJEB41939	SAMEA4447830	Bos_taurus	Mammary	input	NA	NA	NA	NA
ERR4977152	PRJEB41939	SAMEA4447814	Bos_taurus	Liver	H3K27ac	NA	NA	NA	NA
ERR4977153	PRJEB41939	SAMEA4447814	Bos_taurus	Liver	H3K4Me1	NA	NA	NA	NA
ERR4977154	PRJEB41939	SAMEA4447814	Bos_taurus	Liver	H3K4Me3	NA	NA	NA	NA
ERR4977155	PRJEB41939	SAMEA4447814	Bos_taurus	Liver	input	NA	NA	NA	NA
ERR4977156	PRJEB41939	SAMEA4675150	Bos_taurus	Mammary	H3K4Me3	NA	NA	NA	NA
ERR4977157	PRJEB41939	SAMEA4447798	Bos_taurus	Kidney	H3K27ac	NA	NA	NA	NA
ERR4977158	PRJEB41939	SAMEA4447798	Bos_taurus	Kidney	H3K4Me1	NA	NA	NA	NA
ERR4977159	PRJEB41939	SAMEA4447798	Bos_taurus	Kidney	H3K4Me3	NA	NA	NA	NA
ERR4977160	PRJEB41939	SAMEA4447798	Bos_taurus	Kidney	input	NA	NA	NA	NA
ERR4977161	PRJEB41939	SAMEA4447766	Bos_taurus	Lung	H3K27ac	NA	NA	NA	NA
ERR4977162	PRJEB41939	SAMEA4447766	Bos_taurus	Lung	H3K4Me1	NA	NA	NA	NA
ERR4977163	PRJEB41939	SAMEA4447766	Bos_taurus	Lung	H3K4Me3	NA	NA	NA	NA
ERR4977164	PRJEB41939	SAMEA4447766	Bos_taurus	Lung	input	NA	NA	NA	NA
ERR4977165	PRJEB41939	SAMEA4447802	Bos_taurus	Spleen	CTCF	NA	NA	NA	NA
ERR4977166	PRJEB41939	SAMEA4447802	Bos_taurus	Spleen	H3K27ac	NA	NA	NA	NA
ERR4977167	PRJEB41939	SAMEA4447802	Bos_taurus	Spleen	input	NA	NA	NA	NA
ERR4977168	PRJEB41939	SAMEA4447765	Bos_taurus	Kidney	H3K27ac	NA	NA	NA	NA
ERR4977169	PRJEB41939	SAMEA4447765	Bos_taurus	Kidney	H3K4Me1	NA	NA	NA	NA
ERR4977170	PRJEB41939	SAMEA4447765	Bos_taurus	Kidney	H3K4Me3	NA	NA	NA	NA
ERR4977171	PRJEB41939	SAMEA4447765	Bos_taurus	Kidney	input	NA	NA	NA	NA
ERR4977172	PRJEB41939	SAMEA4447767	Bos_taurus	Lung	H3K27ac	NA	NA	NA	NA
ERR4977173	PRJEB41939	SAMEA4447767	Bos_taurus	Lung	H3K4Me1	NA	NA	NA	NA
ERR4977174	PRJEB41939	SAMEA4447767	Bos_taurus	Lung	H3K4Me3	NA	NA	NA	NA
ERR4977175	PRJEB41939	SAMEA4447767	Bos_taurus	Lung	input	NA	NA	NA	NA
ERR4977176	PRJEB41939	SAMEA4447806	Bos_taurus	Spleen	CTCF	NA	NA	NA	NA
ERR4977177	PRJEB41939	SAMEA4447806	Bos_taurus	Spleen	H3K27ac	NA	NA	NA	NA
ERR4977178	PRJEB41939	SAMEA4447806	Bos_taurus	Spleen	input	NA	NA	NA	NA
ERR4977179	PRJEB41939	SAMEA4675145	Bos_taurus	Spleen	CTCF	NA	NA	NA	NA
ERR4977180	PRJEB41939	SAMEA4675145	Bos_taurus	Spleen	input	NA	NA	NA	NA
ERR4977181	PRJEB41939	SAMEA4447830	Bos_taurus	Mammary	H3K4Me3	NA	NA	NA	NA
ERR4977182	PRJEB41939	SAMEA4447830	Bos_taurus	Mammary	input	NA	NA	NA	NA
ERR4977183	PRJEB41939	SAMEA4447814	Bos_taurus	Liver	H3K4Me3	NA	NA	NA	NA
ERR4977184	PRJEB41939	SAMEA4447814	Bos_taurus	Liver	input	NA	NA	NA	NA
ERR4977185	PRJEB41939	SAMEA4447802	Bos_taurus	Spleen	H3K4Me1	NA	NA	NA	NA
ERR4977186	PRJEB41939	SAMEA4447802	Bos_taurus	Spleen	H3K4Me1	NA	NA	NA	NA
ERR4977187	PRJEB41939	SAMEA4447802	Bos_taurus	Spleen	H3K4Me3	NA	NA	NA	NA
ERR4977188	PRJEB41939	SAMEA4447802	Bos_taurus	Spleen	H3K4Me3	NA	NA	NA	NA
ERR4977189	PRJEB41939	SAMEA4447802	Bos_taurus	Spleen	input	NA	NA	NA	NA
ERR4977190	PRJEB41939	SAMEA4447802	Bos_taurus	Spleen	input	NA	NA	NA	NA
ERR4977191	PRJEB41939	SAMEA4447830	Bos_taurus	Mammary	H3K4Me3	NA	NA	NA	NA
ERR4977192	PRJEB41939	SAMEA4447830	Bos_taurus	Mammary	input	NA	NA	NA	NA
ERR4977193	PRJEB41939	SAMEA4447814	Bos_taurus	Liver	H3K4Me3	NA	NA	NA	NA
ERR4977194	PRJEB41939	SAMEA4447814	Bos_taurus	Liver	input	NA	NA	NA	NA
ERR4977195	PRJEB41939	SAMEA4447806	Bos_taurus	Spleen	H3K4Me1	NA	NA	NA	NA
ERR4977196	PRJEB41939	SAMEA4447806	Bos_taurus	Spleen	H3K4Me1	NA	NA	NA	NA
ERR4977197	PRJEB41939	SAMEA4447806	Bos_taurus	Spleen	H3K4Me3	NA	NA	NA	NA
ERR4977198	PRJEB41939	SAMEA4447806	Bos_taurus	Spleen	H3K4Me3	NA	NA	NA	NA
ERR4977199	PRJEB41939	SAMEA4447806	Bos_taurus	Spleen	input	NA	NA	NA	NA
ERR4977200	PRJEB41939	SAMEA4447806	Bos_taurus	Spleen	input	NA	NA	NA	NA
ERR4977201	PRJEB41939	SAMEA4675142	Bos_taurus	Kidney	H3K4Me1	NA	NA	NA	NA
ERR4977202	PRJEB41939	SAMEA4675142	Bos_taurus	Kidney	H3K4Me1	NA	NA	NA	NA
ERR4977203	PRJEB41939	SAMEA4675142	Bos_taurus	Kidney	H3K4Me3	NA	NA	NA	NA
ERR4977204	PRJEB41939	SAMEA4675142	Bos_taurus	Kidney	H3K4Me3	NA	NA	NA	NA
ERR4977205	PRJEB41939	SAMEA4675142	Bos_taurus	Kidney	input	NA	NA	NA	NA
ERR4977206	PRJEB41939	SAMEA4675142	Bos_taurus	Kidney	input	NA	NA	NA	NA
ERR4977207	PRJEB41939	SAMEA4675137	Bos_taurus	Lung	H3K4Me1	NA	NA	NA	NA
ERR4977208	PRJEB41939	SAMEA4675137	Bos_taurus	Lung	H3K4Me1	NA	NA	NA	NA
ERR4977209	PRJEB41939	SAMEA4675137	Bos_taurus	Lung	H3K4Me3	NA	NA	NA	NA
ERR4977210	PRJEB41939	SAMEA4675137	Bos_taurus	Lung	H3K4Me3	NA	NA	NA	NA
ERR4977211	PRJEB41939	SAMEA4675137	Bos_taurus	Lung	input	NA	NA	NA	NA
ERR4977212	PRJEB41939	SAMEA4675137	Bos_taurus	Lung	input	NA	NA	NA	NA
ERR4977213	PRJEB41939	SAMEA4447762	Bos_taurus	Mammary	H3K27Me3	NA	NA	NA	NA
ERR4977214	PRJEB41939	SAMEA4675143	Bos_taurus	Liver	H3K27Me3	NA	NA	NA	NA
ERR4977215	PRJEB41939	SAMEA4675143	Bos_taurus	Liver	input	NA	NA	NA	NA
ERR4977216	PRJEB41939	SAMEA4675145	Bos_taurus	Spleen	H3K27ac	NA	NA	NA	NA
ERR4977217	PRJEB41939	SAMEA4675145	Bos_taurus	Spleen	input	NA	NA	NA	NA
ERR4977218	PRJEB41939	SAMEA4447787	Bos_taurus	Liver	H3K4Me3	NA	NA	NA	NA
ERR4977219	PRJEB41939	SAMEA4447787	Bos_taurus	Liver	H3K4Me3	NA	NA	NA	NA
ERR4977220	PRJEB41939	SAMEA4447787	Bos_taurus	Liver	H3K4Me3	NA	NA	NA	NA
ERR4977221	PRJEB41939	SAMEA4447787	Bos_taurus	Liver	input	NA	NA	NA	NA
ERR4977222	PRJEB41939	SAMEA4447787	Bos_taurus	Liver	input	NA	NA	NA	NA
ERR4977223	PRJEB41939	SAMEA4447787	Bos_taurus	Liver	input	NA	NA	NA	NA
ERR4977224	PRJEB41939	SAMEA4447830	Bos_taurus	Mammary	H3K4Me3	NA	NA	NA	NA
ERR4977225	PRJEB41939	SAMEA4447830	Bos_taurus	Mammary	H3K4Me3	NA	NA	NA	NA
ERR4977226	PRJEB41939	SAMEA4447830	Bos_taurus	Mammary	H3K4Me3	NA	NA	NA	NA
ERR4977227	PRJEB41939	SAMEA4447830	Bos_taurus	Mammary	input	NA	NA	NA	NA
ERR4977228	PRJEB41939	SAMEA4447830	Bos_taurus	Mammary	input	NA	NA	NA	NA
ERR4977229	PRJEB41939	SAMEA4447830	Bos_taurus	Mammary	input	NA	NA	NA	NA
ERR4977230	PRJEB41939	SAMEA4447814	Bos_taurus	Liver	H3K27ac	NA	NA	NA	NA
ERR4977231	PRJEB41939	SAMEA4447814	Bos_taurus	Liver	H3K27ac	NA	NA	NA	NA
ERR4977232	PRJEB41939	SAMEA4447814	Bos_taurus	Liver	H3K27ac	NA	NA	NA	NA
ERR4977233	PRJEB41939	SAMEA4447814	Bos_taurus	Liver	H3K4Me1	NA	NA	NA	NA
ERR4977234	PRJEB41939	SAMEA4447814	Bos_taurus	Liver	H3K4Me1	NA	NA	NA	NA
ERR4977235	PRJEB41939	SAMEA4447814	Bos_taurus	Liver	H3K4Me1	NA	NA	NA	NA
ERR4977236	PRJEB41939	SAMEA4675150	Bos_taurus	Mammary	H3K4Me3	NA	NA	NA	NA
ERR4977237	PRJEB41939	SAMEA4675150	Bos_taurus	Mammary	H3K4Me3	NA	NA	NA	NA
ERR4977238	PRJEB41939	SAMEA4675150	Bos_taurus	Mammary	H3K4Me3	NA	NA	NA	NA
ERR4977239	PRJEB41939	SAMEA4447830	Bos_taurus	Mammary	H3K27Me3	NA	NA	NA	NA
ERR4977240	PRJEB41939	SAMEA4447830	Bos_taurus	Mammary	H3K27Me3	NA	NA	NA	NA
ERR4977241	PRJEB41939	SAMEA4447802	Bos_taurus	Spleen	CTCF	NA	NA	NA	NA
ERR4977242	PRJEB41939	SAMEA4447802	Bos_taurus	Spleen	CTCF	NA	NA	NA	NA
ERR4977243	PRJEB41939	SAMEA4447802	Bos_taurus	Spleen	H3K27ac	NA	NA	NA	NA
ERR4977244	PRJEB41939	SAMEA4447802	Bos_taurus	Spleen	H3K27ac	NA	NA	NA	NA
ERR4977245	PRJEB41939	SAMEA4447802	Bos_taurus	Spleen	input	NA	NA	NA	NA
ERR4977246	PRJEB41939	SAMEA4447802	Bos_taurus	Spleen	input	NA	NA	NA	NA
ERR4977247	PRJEB41939	SAMEA4447806	Bos_taurus	Spleen	CTCF	NA	NA	NA	NA
ERR4977248	PRJEB41939	SAMEA4447806	Bos_taurus	Spleen	CTCF	NA	NA	NA	NA
ERR4977249	PRJEB41939	SAMEA4447806	Bos_taurus	Spleen	H3K27ac	NA	NA	NA	NA
ERR4977250	PRJEB41939	SAMEA4447806	Bos_taurus	Spleen	H3K27ac	NA	NA	NA	NA
ERR4977251	PRJEB41939	SAMEA4447806	Bos_taurus	Spleen	input	NA	NA	NA	NA
ERR4977252	PRJEB41939	SAMEA4447806	Bos_taurus	Spleen	input	NA	NA	NA	NA
ERR4977253	PRJEB41939	SAMEA4675145	Bos_taurus	Spleen	CTCF	NA	NA	NA	NA
ERR4977254	PRJEB41939	SAMEA4675145	Bos_taurus	Spleen	CTCF	NA	NA	NA	NA
ERR4977255	PRJEB41939	SAMEA4675145	Bos_taurus	Spleen	input	NA	NA	NA	NA
ERR4977256	PRJEB41939	SAMEA4675145	Bos_taurus	Spleen	input	NA	NA	NA	NA
ERR4977257	PRJEB41939	SAMEA4447798	Bos_taurus	Kidney	H3K27ac	NA	NA	NA	NA
ERR4977258	PRJEB41939	SAMEA4447798	Bos_taurus	Kidney	H3K27ac	NA	NA	NA	NA
ERR4977259	PRJEB41939	SAMEA4447798	Bos_taurus	Kidney	H3K4Me1	NA	NA	NA	NA
ERR4977260	PRJEB41939	SAMEA4447798	Bos_taurus	Kidney	H3K4Me1	NA	NA	NA	NA
ERR4977261	PRJEB41939	SAMEA4447798	Bos_taurus	Kidney	H3K4Me3	NA	NA	NA	NA
ERR4977262	PRJEB41939	SAMEA4447798	Bos_taurus	Kidney	H3K4Me3	NA	NA	NA	NA
ERR4977263	PRJEB41939	SAMEA4447798	Bos_taurus	Kidney	input	NA	NA	NA	NA
ERR4977264	PRJEB41939	SAMEA4447798	Bos_taurus	Kidney	input	NA	NA	NA	NA
ERR4977265	PRJEB41939	SAMEA4447766	Bos_taurus	Lung	H3K27ac	NA	NA	NA	NA
ERR4977266	PRJEB41939	SAMEA4447766	Bos_taurus	Lung	H3K27ac	NA	NA	NA	NA
ERR4977267	PRJEB41939	SAMEA4447766	Bos_taurus	Lung	H3K4Me1	NA	NA	NA	NA
ERR4977268	PRJEB41939	SAMEA4447766	Bos_taurus	Lung	H3K4Me1	NA	NA	NA	NA
ERR4977269	PRJEB41939	SAMEA4447766	Bos_taurus	Lung	H3K4Me3	NA	NA	NA	NA
ERR4977270	PRJEB41939	SAMEA4447766	Bos_taurus	Lung	H3K4Me3	NA	NA	NA	NA
ERR4977271	PRJEB41939	SAMEA4447766	Bos_taurus	Lung	input	NA	NA	NA	NA
ERR4977272	PRJEB41939	SAMEA4447766	Bos_taurus	Lung	input	NA	NA	NA	NA
ERR4977273	PRJEB41939	SAMEA4447765	Bos_taurus	Kidney	H3K27ac	NA	NA	NA	NA
ERR4977274	PRJEB41939	SAMEA4447765	Bos_taurus	Kidney	H3K27ac	NA	NA	NA	NA
ERR4977275	PRJEB41939	SAMEA4447765	Bos_taurus	Kidney	H3K4Me1	NA	NA	NA	NA
ERR4977276	PRJEB41939	SAMEA4447765	Bos_taurus	Kidney	H3K4Me1	NA	NA	NA	NA
ERR4977277	PRJEB41939	SAMEA4447765	Bos_taurus	Kidney	H3K4Me3	NA	NA	NA	NA
ERR4977278	PRJEB41939	SAMEA4447765	Bos_taurus	Kidney	H3K4Me3	NA	NA	NA	NA
ERR4977279	PRJEB41939	SAMEA4447765	Bos_taurus	Kidney	input	NA	NA	NA	NA
ERR4977280	PRJEB41939	SAMEA4447765	Bos_taurus	Kidney	input	NA	NA	NA	NA
ERR4977281	PRJEB41939	SAMEA4447767	Bos_taurus	Lung	H3K27ac	NA	NA	NA	NA
ERR4977282	PRJEB41939	SAMEA4447767	Bos_taurus	Lung	H3K27ac	NA	NA	NA	NA
ERR4977283	PRJEB41939	SAMEA4447767	Bos_taurus	Lung	H3K4Me1	NA	NA	NA	NA
ERR4977284	PRJEB41939	SAMEA4447767	Bos_taurus	Lung	H3K4Me1	NA	NA	NA	NA
ERR4977285	PRJEB41939	SAMEA4447767	Bos_taurus	Lung	H3K4Me3	NA	NA	NA	NA
ERR4977286	PRJEB41939	SAMEA4447767	Bos_taurus	Lung	H3K4Me3	NA	NA	NA	NA
ERR4977287	PRJEB41939	SAMEA4447767	Bos_taurus	Lung	input	NA	NA	NA	NA
ERR4977288	PRJEB41939	SAMEA4447767	Bos_taurus	Lung	input	NA	NA	NA	NA
ERR4977289	PRJEB41939	SAMEA4447787	Bos_taurus	Liver	H3K27ac	NA	NA	NA	NA
ERR4977290	PRJEB41939	SAMEA4447787	Bos_taurus	Liver	H3K27ac	NA	NA	NA	NA
ERR4977291	PRJEB41939	SAMEA4447787	Bos_taurus	Liver	H3K27ac	NA	NA	NA	NA
ERR4977292	PRJEB41939	SAMEA4447787	Bos_taurus	Liver	H3K27ac	NA	NA	NA	NA
ERR4977293	PRJEB41939	SAMEA4447830	Bos_taurus	Mammary	H3K27ac	NA	NA	NA	NA
ERR4977294	PRJEB41939	SAMEA4447830	Bos_taurus	Mammary	H3K27ac	NA	NA	NA	NA
ERR4977295	PRJEB41939	SAMEA4447830	Bos_taurus	Mammary	H3K27ac	NA	NA	NA	NA
ERR4977296	PRJEB41939	SAMEA4447830	Bos_taurus	Mammary	H3K27ac	NA	NA	NA	NA
ERR4977297	PRJEB41939	SAMEA4447830	Bos_taurus	Mammary	H3K4Me1	NA	NA	NA	NA
ERR4977298	PRJEB41939	SAMEA4447830	Bos_taurus	Mammary	H3K4Me1	NA	NA	NA	NA
ERR4977299	PRJEB41939	SAMEA4447830	Bos_taurus	Mammary	H3K4Me1	NA	NA	NA	NA
ERR4977300	PRJEB41939	SAMEA4447830	Bos_taurus	Mammary	H3K4Me1	NA	NA	NA	NA
ERR4977301	PRJEB41939	SAMEA4675143	Bos_taurus	Liver	H3K4Me1	NA	NA	NA	NA
ERR4977302	PRJEB41939	SAMEA4675143	Bos_taurus	Liver	H3K4Me1	NA	NA	NA	NA
ERR4977303	PRJEB41939	SAMEA4675143	Bos_taurus	Liver	H3K4Me1	NA	NA	NA	NA
ERR4977304	PRJEB41939	SAMEA4675143	Bos_taurus	Liver	H3K4Me1	NA	NA	NA	NA
ERR4977305	PRJEB41939	SAMEA4675150	Bos_taurus	Mammary	H3K27ac	NA	NA	NA	NA
ERR4977306	PRJEB41939	SAMEA4675150	Bos_taurus	Mammary	H3K27ac	NA	NA	NA	NA
ERR4977307	PRJEB41939	SAMEA4675150	Bos_taurus	Mammary	H3K27ac	NA	NA	NA	NA
ERR4977308	PRJEB41939	SAMEA4675150	Bos_taurus	Mammary	H3K27ac	NA	NA	NA	NA
ERR4977309	PRJEB41939	SAMEA4447762	Bos_taurus	Mammary	H3K27Me3	NA	NA	NA	NA
ERR4977310	PRJEB41939	SAMEA4447762	Bos_taurus	Mammary	H3K27Me3	NA	NA	NA	NA
ERR4977311	PRJEB41939	SAMEA4447762	Bos_taurus	Mammary	H3K27Me3	NA	NA	NA	NA
ERR4977312	PRJEB41939	SAMEA4675143	Bos_taurus	Liver	H3K27Me3	NA	NA	NA	NA
ERR4977313	PRJEB41939	SAMEA4675143	Bos_taurus	Liver	H3K27Me3	NA	NA	NA	NA
ERR4977314	PRJEB41939	SAMEA4675143	Bos_taurus	Liver	H3K27Me3	NA	NA	NA	NA
ERR4977315	PRJEB41939	SAMEA4675143	Bos_taurus	Liver	input	NA	NA	NA	NA
ERR4977316	PRJEB41939	SAMEA4675143	Bos_taurus	Liver	input	NA	NA	NA	NA
ERR4977317	PRJEB41939	SAMEA4675143	Bos_taurus	Liver	input	NA	NA	NA	NA
ERR4977318	PRJEB41939	SAMEA4447787	Bos_taurus	Liver	H3K27Me3	NA	NA	NA	NA
ERR4977319	PRJEB41939	SAMEA4447787	Bos_taurus	Liver	H3K27Me3	NA	NA	NA	NA
ERR4977320	PRJEB41939	SAMEA4447787	Bos_taurus	Liver	H3K27Me3	NA	NA	NA	NA
ERR4977321	PRJEB41939	SAMEA4447787	Bos_taurus	Liver	H3K4Me1	NA	NA	NA	NA
ERR4977322	PRJEB41939	SAMEA4447787	Bos_taurus	Liver	H3K4Me1	NA	NA	NA	NA
ERR4977323	PRJEB41939	SAMEA4447787	Bos_taurus	Liver	H3K4Me1	NA	NA	NA	NA
ERR4977324	PRJEB41939	SAMEA4447830	Bos_taurus	Mammary	H3K27Me3	NA	NA	NA	NA
ERR4977325	PRJEB41939	SAMEA4447830	Bos_taurus	Mammary	H3K27Me3	NA	NA	NA	NA
ERR4977326	PRJEB41939	SAMEA4447830	Bos_taurus	Mammary	H3K27Me3	NA	NA	NA	NA
ERR4977327	PRJEB41939	SAMEA4447830	Bos_taurus	Mammary	H3K27ac	NA	NA	NA	NA
ERR4977328	PRJEB41939	SAMEA4447830	Bos_taurus	Mammary	H3K27ac	NA	NA	NA	NA
ERR4977329	PRJEB41939	SAMEA4447830	Bos_taurus	Mammary	H3K27ac	NA	NA	NA	NA
ERR4977330	PRJEB41939	SAMEA4447830	Bos_taurus	Mammary	H3K4Me1	NA	NA	NA	NA
ERR4977331	PRJEB41939	SAMEA4447830	Bos_taurus	Mammary	H3K4Me1	NA	NA	NA	NA
ERR4977332	PRJEB41939	SAMEA4447830	Bos_taurus	Mammary	H3K4Me1	NA	NA	NA	NA
ERR4977333	PRJEB41939	SAMEA4447814	Bos_taurus	Liver	H3K27Me3	NA	NA	NA	NA
ERR4977334	PRJEB41939	SAMEA4447814	Bos_taurus	Liver	H3K27Me3	NA	NA	NA	NA
ERR4977335	PRJEB41939	SAMEA4447814	Bos_taurus	Liver	H3K27Me3	NA	NA	NA	NA
ERR4977336	PRJEB41939	SAMEA4675150	Bos_taurus	Mammary	H3K27Me3	NA	NA	NA	NA
ERR4977337	PRJEB41939	SAMEA4675150	Bos_taurus	Mammary	H3K27Me3	NA	NA	NA	NA
ERR4977338	PRJEB41939	SAMEA4675150	Bos_taurus	Mammary	H3K27Me3	NA	NA	NA	NA
ERR4977339	PRJEB41939	SAMEA4447830	Bos_taurus	Mammary	H3K27Me3	NA	NA	NA	NA
ERR4977340	PRJEB41939	SAMEA4447762	Bos_taurus	Mammary	H3K27ac	NA	NA	NA	NA
ERR4977341	PRJEB41939	SAMEA4447762	Bos_taurus	Mammary	H3K4Me1	NA	NA	NA	NA
ERR4977342	PRJEB41939	SAMEA4447798	Bos_taurus	Kidney	H3K27ac	NA	NA	NA	NA
ERR4977343	PRJEB41939	SAMEA4447798	Bos_taurus	Kidney	H3K4Me1	NA	NA	NA	NA
ERR4977344	PRJEB41939	SAMEA4447798	Bos_taurus	Kidney	H3K4Me3	NA	NA	NA	NA
ERR4977345	PRJEB41939	SAMEA4447798	Bos_taurus	Kidney	input	NA	NA	NA	NA
ERR4977346	PRJEB41939	SAMEA4447766	Bos_taurus	Lung	H3K27ac	NA	NA	NA	NA
ERR4977347	PRJEB41939	SAMEA4447766	Bos_taurus	Lung	H3K4Me1	NA	NA	NA	NA
ERR4977348	PRJEB41939	SAMEA4447766	Bos_taurus	Lung	H3K4Me3	NA	NA	NA	NA
ERR4977349	PRJEB41939	SAMEA4447766	Bos_taurus	Lung	input	NA	NA	NA	NA
ERR4977350	PRJEB41939	SAMEA4447802	Bos_taurus	Spleen	CTCF	NA	NA	NA	NA
ERR4977351	PRJEB41939	SAMEA4447802	Bos_taurus	Spleen	H3K27ac	NA	NA	NA	NA
ERR4977352	PRJEB41939	SAMEA4447802	Bos_taurus	Spleen	input	NA	NA	NA	NA
ERR4977353	PRJEB41939	SAMEA4447765	Bos_taurus	Kidney	H3K27ac	NA	NA	NA	NA
ERR4977354	PRJEB41939	SAMEA4447765	Bos_taurus	Kidney	H3K4Me1	NA	NA	NA	NA
ERR4977355	PRJEB41939	SAMEA4447765	Bos_taurus	Kidney	H3K4Me3	NA	NA	NA	NA
ERR4977356	PRJEB41939	SAMEA4447765	Bos_taurus	Kidney	input	NA	NA	NA	NA
ERR4977357	PRJEB41939	SAMEA4447767	Bos_taurus	Lung	H3K27ac	NA	NA	NA	NA
ERR4977358	PRJEB41939	SAMEA4447767	Bos_taurus	Lung	H3K4Me1	NA	NA	NA	NA
ERR4977359	PRJEB41939	SAMEA4447767	Bos_taurus	Lung	H3K4Me3	NA	NA	NA	NA
ERR4977360	PRJEB41939	SAMEA4447767	Bos_taurus	Lung	input	NA	NA	NA	NA
ERR4977361	PRJEB41939	SAMEA4447806	Bos_taurus	Spleen	CTCF	NA	NA	NA	NA
ERR4977362	PRJEB41939	SAMEA4447806	Bos_taurus	Spleen	H3K27ac	NA	NA	NA	NA
ERR4977363	PRJEB41939	SAMEA4447806	Bos_taurus	Spleen	input	NA	NA	NA	NA
ERR4977364	PRJEB41939	SAMEA4675145	Bos_taurus	Spleen	CTCF	NA	NA	NA	NA
ERR4977365	PRJEB41939	SAMEA4675145	Bos_taurus	Spleen	input	NA	NA	NA	NA
ERR4977366	PRJEB41939	SAMEA4675142	Bos_taurus	Kidney	CTCF	NA	NA	NA	NA
ERR4977367	PRJEB41939	SAMEA4675142	Bos_taurus	Kidney	input	NA	NA	NA	NA
ERR4977368	PRJEB41939	SAMEA4675137	Bos_taurus	Lung	CTCF	NA	NA	NA	NA
ERR4977369	PRJEB41939	SAMEA4675137	Bos_taurus	Lung	input	NA	NA	NA	NA
ERR4977370	PRJEB41939	SAMEA4675142	Bos_taurus	Kidney	input	NA	NA	NA	NA
ERR4977371	PRJEB41939	SAMEA4675137	Bos_taurus	Lung	CTCF	NA	NA	NA	NA
ERR4977372	PRJEB41939	SAMEA4675137	Bos_taurus	Lung	input	NA	NA	NA	NA
ERR4977373	PRJEB41939	SAMEA4447802	Bos_taurus	Spleen	H3K27Me3	NA	NA	NA	NA
ERR4977374	PRJEB41939	SAMEA4447802	Bos_taurus	Spleen	input	NA	NA	NA	NA
ERR4977375	PRJEB41939	SAMEA4447806	Bos_taurus	Spleen	H3K27Me3	NA	NA	NA	NA
ERR4977376	PRJEB41939	SAMEA4447806	Bos_taurus	Spleen	input	NA	NA	NA	NA
ERR4977377	PRJEB41939	SAMEA4675151	Bos_taurus	Heart	H3K27Me3	NA	NA	NA	NA
ERR4977378	PRJEB41939	SAMEA4675151	Bos_taurus	Heart	input	NA	NA	NA	NA
ERR4977379	PRJEB41939	SAMEA4675145	Bos_taurus	Spleen	H3K27Me3	NA	NA	NA	NA
ERR4977380	PRJEB41939	SAMEA4675145	Bos_taurus	Spleen	input	NA	NA	NA	NA
ERR9638390	PRJEB52456	SAMN16990941	Bos_taurus	Mammary	H3K4Me3	Adult	Friesian	female	NA
ERR9638391	PRJEB52456	SAMN16991178	Bos_taurus	Mammary	H3K4Me1	Adult	Friesian	female	NA
ERR9638392	PRJEB52456	SAMN16991178	Bos_taurus	Mammary	H3K4Me3	Adult	Friesian	female	NA
ERR9638393	PRJEB52456	SAMN16990950	Bos_taurus	Mammary	H3K4Me1	Adult	Friesian	female	NA
ERR9638394	PRJEB52456	SAMN16990950	Bos_taurus	Mammary	H3K4Me3	Adult	Friesian	female	NA
ERR9638395	PRJEB52456	SAMN16991103	Bos_taurus	Mammary	H3K27ac	Adult	unuseful	female	NA
ERR9638396	PRJEB52456	SAMN16991103	Bos_taurus	Mammary	H3K4Me1	Adult	unuseful	female	NA
ERR9638397	PRJEB52456	SAMN16991103	Bos_taurus	Mammary	H3K4Me3	Adult	unuseful	female	NA
ERR9638398	PRJEB52456	SAMN16991027	Bos_taurus	Mammary	H3K27ac	Adult	Friesian	female	NA
ERR9638399	PRJEB52456	SAMN16991027	Bos_taurus	Mammary	H3K4Me1	Adult	Friesian	female	NA
ERR9638400	PRJEB52456	SAMN16991027	Bos_taurus	Mammary	H3K4Me3	Adult	Friesian	female	NA
ERR9638401	PRJEB52456	SAMN16991218	Bos_taurus	Mammary	H3K27ac	Adult	Friesian	female	NA
ERR9638402	PRJEB52456	SAMN16991218	Bos_taurus	Mammary	H3K4Me1	Adult	Friesian	female	NA
ERR9638403	PRJEB52456	SAMN16991218	Bos_taurus	Mammary	H3K4Me3	Adult	Friesian	female	NA
ERR9638404	PRJEB52456	SAMN16991108	Bos_taurus	Mammary	H3K4Me1	Adult	Friesian	female	NA
ERR9638405	PRJEB52456	SAMN16990952	Bos_taurus	Mammary	H3K4Me1	Adult	unuseful	female	NA
ERR9638406	PRJEB52456	SAMN16990952	Bos_taurus	Mammary	H3K4Me3	Adult	unuseful	female	NA
ERR9638407	PRJEB52456	SAMN16991046	Bos_taurus	Mammary	H3K27ac	Adult	unuseful	female	NA
ERR9638408	PRJEB52456	SAMN16991054	Bos_taurus	Mammary	H3K4Me1	Adult	unuseful	female	NA
ERR9638409	PRJEB52456	SAMN16991054	Bos_taurus	Mammary	H3K4Me3	Adult	unuseful	female	NA
ERR9638410	PRJEB52456	SAMN16991007	Bos_taurus	Mammary	H3K4Me1	Adult	Friesian	female	NA
ERR9638411	PRJEB52456	SAMN16991007	Bos_taurus	Mammary	H3K4Me3	Adult	Friesian	female	NA
ERR9638412	PRJEB52456	SAMN16991007	Bos_taurus	Mammary	input	Adult	Friesian	female	NA
ERR9638413	PRJEB52456	SAMN16991017	Bos_taurus	Mammary	H3K27ac	Adult	Friesian	female	NA
ERR9638414	PRJEB52456	SAMN16991017	Bos_taurus	Mammary	H3K4Me1	Adult	Friesian	female	NA
ERR9638415	PRJEB52456	SAMN16991017	Bos_taurus	Mammary	H3K4Me3	Adult	Friesian	female	NA
ERR9638416	PRJEB52456	SAMN16991017	Bos_taurus	Mammary	input	Adult	Friesian	female	NA
ERR9638417	PRJEB52456	SAMN16991243	Bos_taurus	Mammary	H3K27ac	Adult	Friesian	female	NA
ERR9638418	PRJEB52456	SAMN16991243	Bos_taurus	Mammary	H3K4Me1	Adult	Friesian	female	NA
ERR9638419	PRJEB52456	SAMN16991243	Bos_taurus	Mammary	H3K4Me3	Adult	Friesian	female	NA
ERR9638420	PRJEB52456	SAMN16991243	Bos_taurus	Mammary	input	Adult	Friesian	female	NA
ERR9638421	PRJEB52456	SAMN16991043	Bos_taurus	Mammary	H3K4Me1	Adult	Friesian	female	NA
ERR9638422	PRJEB52456	SAMN16991043	Bos_taurus	Mammary	H3K4Me3	Adult	Friesian	female	NA
ERR9638423	PRJEB52456	SAMN16991043	Bos_taurus	Mammary	input	Adult	Friesian	female	NA
ERR9638424	PRJEB52456	SAMN16990904	Bos_taurus	Mammary	H3K4Me1	Adult	Friesian	female	NA
ERR9638425	PRJEB52456	SAMN16990904	Bos_taurus	Mammary	H3K4Me3	Adult	Friesian	female	NA
ERR9638426	PRJEB52456	SAMN16990904	Bos_taurus	Mammary	input	Adult	Friesian	female	NA
ERR9638427	PRJEB52456	SAMN16991089	Bos_taurus	Mammary	H3K4Me1	Adult	Friesian	female	NA
ERR9638428	PRJEB52456	SAMN16991089	Bos_taurus	Mammary	H3K4Me3	Adult	Friesian	female	NA
ERR9638429	PRJEB52456	SAMN16991089	Bos_taurus	Mammary	input	Adult	Friesian	female	NA
ERR9638430	PRJEB52456	SAMN16991146	Bos_taurus	Mammary	H3K4Me1	Adult	Friesian	female	NA
ERR9638431	PRJEB52456	SAMN16991146	Bos_taurus	Mammary	H3K4Me3	Adult	Friesian	female	NA
ERR9638432	PRJEB52456	SAMN16991146	Bos_taurus	Mammary	input	Adult	Friesian	female	NA
ERR9638433	PRJEB52456	SAMN16990973	Bos_taurus	Mammary	H3K4Me1	Adult	Friesian	female	NA
ERR9638434	PRJEB52456	SAMN16990973	Bos_taurus	Mammary	H3K4Me3	Adult	Friesian	female	NA
ERR9638435	PRJEB52456	SAMN16990973	Bos_taurus	Mammary	input	Adult	Friesian	female	NA
ERR9638436	PRJEB52456	SAMN16990938	Bos_taurus	Mammary	H3K27ac	Adult	Friesian	female	NA
ERR9638437	PRJEB52456	SAMN16990938	Bos_taurus	Mammary	H3K4Me1	Adult	Friesian	female	NA
ERR9638438	PRJEB52456	SAMN16990938	Bos_taurus	Mammary	H3K4Me3	Adult	Friesian	female	NA
ERR9638439	PRJEB52456	SAMN16990938	Bos_taurus	Mammary	input	Adult	Friesian	female	NA
ERR9638440	PRJEB52456	SAMN16991053	Bos_taurus	Mammary	H3K27ac	Adult	Friesian	female	NA
ERR9638441	PRJEB52456	SAMN16991053	Bos_taurus	Mammary	H3K4Me1	Adult	Friesian	female	NA
ERR9638442	PRJEB52456	SAMN16991053	Bos_taurus	Mammary	H3K4Me3	Adult	Friesian	female	NA
ERR9638443	PRJEB52456	SAMN16991053	Bos_taurus	Mammary	input	Adult	Friesian	female	NA
ERR9638444	PRJEB52456	SAMN16991099	Bos_taurus	Mammary	H3K27ac	Adult	Friesian	female	NA
ERR9638445	PRJEB52456	SAMN16991099	Bos_taurus	Mammary	H3K4Me1	Adult	Friesian	female	NA
ERR9638446	PRJEB52456	SAMN16991099	Bos_taurus	Mammary	H3K4Me3	Adult	Friesian	female	NA
ERR9638447	PRJEB52456	SAMN16991099	Bos_taurus	Mammary	input	Adult	Friesian	female	NA
ERR9638448	PRJEB52456	SAMN16991234	Bos_taurus	Mammary	H3K27ac	Adult	Friesian	female	NA
ERR9638449	PRJEB52456	SAMN16991234	Bos_taurus	Mammary	H3K4Me1	Adult	Friesian	female	NA
ERR9638450	PRJEB52456	SAMN16991234	Bos_taurus	Mammary	H3K4Me3	Adult	Friesian	female	NA
ERR9638451	PRJEB52456	SAMN16991234	Bos_taurus	Mammary	input	Adult	Friesian	female	NA
ERR9638452	PRJEB52456	SAMN16991132	Bos_taurus	Mammary	H3K4Me1	Adult	Friesian	female	NA
ERR9638453	PRJEB52456	SAMN16991132	Bos_taurus	Mammary	H3K4Me3	Adult	Friesian	female	NA
ERR9638454	PRJEB52456	SAMN16991132	Bos_taurus	Mammary	input	Adult	Friesian	female	NA
ERR9638455	PRJEB52456	SAMN16991200	Bos_taurus	Mammary	H3K4Me1	Adult	Friesian	female	NA
ERR9638456	PRJEB52456	SAMN16991200	Bos_taurus	Mammary	H3K4Me3	Adult	Friesian	female	NA
ERR9638457	PRJEB52456	SAMN16991200	Bos_taurus	Mammary	input	Adult	Friesian	female	NA
ERR9638458	PRJEB52456	SAMN16990983	Bos_taurus	Mammary	H3K27ac	Adult	Friesian	female	NA
ERR9638459	PRJEB52456	SAMN16990983	Bos_taurus	Mammary	H3K4Me1	Adult	Friesian	female	NA
ERR9638460	PRJEB52456	SAMN16990983	Bos_taurus	Mammary	H3K4Me3	Adult	Friesian	female	NA
ERR9638461	PRJEB52456	SAMN16990983	Bos_taurus	Mammary	input	Adult	Friesian	female	NA
ERR9638462	PRJEB52456	SAMN16991044	Bos_taurus	Mammary	H3K4Me1	Adult	Friesian	female	NA
ERR9638463	PRJEB52456	SAMN16991044	Bos_taurus	Mammary	H3K4Me3	Adult	Friesian	female	NA
ERR9638464	PRJEB52456	SAMN16991044	Bos_taurus	Mammary	input	Adult	Friesian	female	NA
ERR9638465	PRJEB52456	SAMN16991257	Bos_taurus	Mammary	H3K4Me1	Adult	unuseful	female	NA
ERR9638466	PRJEB52456	SAMN16991257	Bos_taurus	Mammary	H3K4Me3	Adult	unuseful	female	NA
ERR9638467	PRJEB52456	SAMN16991257	Bos_taurus	Mammary	input	Adult	unuseful	female	NA
ERR9638468	PRJEB52456	SAMN16991023	Bos_taurus	Mammary	H3K27ac	Adult	unuseful	female	NA
ERR9638469	PRJEB52456	SAMN16991023	Bos_taurus	Mammary	H3K4Me1	Adult	unuseful	female	NA
ERR9638470	PRJEB52456	SAMN16991023	Bos_taurus	Mammary	H3K4Me3	Adult	unuseful	female	NA
ERR9638471	PRJEB52456	SAMN16991023	Bos_taurus	Mammary	input	Adult	unuseful	female	NA
ERR9638472	PRJEB52456	SAMN16990976	Bos_taurus	Mammary	H3K4Me1	Adult	Friesian	female	NA
ERR9638473	PRJEB52456	SAMN16990976	Bos_taurus	Mammary	H3K4Me3	Adult	Friesian	female	NA
ERR9638474	PRJEB52456	SAMN16990976	Bos_taurus	Mammary	input	Adult	Friesian	female	NA
ERR9638475	PRJEB52456	SAMN16990948	Bos_taurus	Mammary	H3K27ac	Adult	Friesian	female	NA
ERR9638476	PRJEB52456	SAMN16990948	Bos_taurus	Mammary	H3K4Me1	Adult	Friesian	female	NA
ERR9638477	PRJEB52456	SAMN16990948	Bos_taurus	Mammary	H3K4Me3	Adult	Friesian	female	NA
ERR9638478	PRJEB52456	SAMN16990948	Bos_taurus	Mammary	input	Adult	Friesian	female	NA
ERR9638479	PRJEB52456	SAMN16991031	Bos_taurus	Mammary	H3K4Me1	Adult	unuseful	female	NA
ERR9638480	PRJEB52456	SAMN16991031	Bos_taurus	Mammary	H3K4Me3	Adult	unuseful	female	NA
ERR9638481	PRJEB52456	SAMN16991031	Bos_taurus	Mammary	input	Adult	unuseful	female	NA
ERR9638482	PRJEB52456	SAMN16990947	Bos_taurus	Mammary	H3K27ac	Adult	Friesian	female	NA
ERR9638483	PRJEB52456	SAMN16990947	Bos_taurus	Mammary	H3K4Me1	Adult	Friesian	female	NA
ERR9638484	PRJEB52456	SAMN16990947	Bos_taurus	Mammary	H3K4Me3	Adult	Friesian	female	NA
ERR9638485	PRJEB52456	SAMN16990947	Bos_taurus	Mammary	input	Adult	Friesian	female	NA
ERR9638486	PRJEB52456	SAMN16990947	Bos_taurus	Mammary	H3K27ac	Adult	Friesian	female	NA
ERR9638487	PRJEB52456	SAMN16990947	Bos_taurus	Mammary	H3K4Me1	Adult	Friesian	female	NA
ERR9638488	PRJEB52456	SAMN16990947	Bos_taurus	Mammary	H3K4Me3	Adult	Friesian	female	NA
ERR9638489	PRJEB52456	SAMN16990947	Bos_taurus	Mammary	input	Adult	Friesian	female	NA
ERR9638490	PRJEB52456	SAMN16991135	Bos_taurus	Mammary	H3K4Me1	Adult	Cross	female	NA
ERR9638491	PRJEB52456	SAMN16991135	Bos_taurus	Mammary	H3K4Me3	Adult	Cross	female	NA
ERR9638492	PRJEB52456	SAMN16991135	Bos_taurus	Mammary	input	Adult	Cross	female	NA
ERR9638493	PRJEB52456	SAMN16991090	Bos_taurus	Mammary	H3K4Me1	Adult	Friesian	female	NA
ERR9638494	PRJEB52456	SAMN16991090	Bos_taurus	Mammary	H3K4Me3	Adult	Friesian	female	NA
ERR9638495	PRJEB52456	SAMN16991090	Bos_taurus	Mammary	input	Adult	Friesian	female	NA
ERR9638496	PRJEB52456	SAMN16990930	Bos_taurus	Mammary	H3K4Me1	Adult	Friesian	female	NA
ERR9638497	PRJEB52456	SAMN16990930	Bos_taurus	Mammary	H3K4Me3	Adult	Friesian	female	NA
ERR9638498	PRJEB52456	SAMN16990930	Bos_taurus	Mammary	input	Adult	Friesian	female	NA
ERR9638499	PRJEB52456	SAMN16990917	Bos_taurus	Mammary	H3K27ac	Adult	Friesian	female	NA
ERR9638500	PRJEB52456	SAMN16990917	Bos_taurus	Mammary	H3K4Me1	Adult	Friesian	female	NA
ERR9638501	PRJEB52456	SAMN16990917	Bos_taurus	Mammary	H3K4Me3	Adult	Friesian	female	NA
ERR9638502	PRJEB52456	SAMN16990917	Bos_taurus	Mammary	input	Adult	Friesian	female	NA
ERR9638503	PRJEB52456	SAMN16991007	Bos_taurus	Mammary	H3K4Me1	Adult	Friesian	female	NA
ERR9638504	PRJEB52456	SAMN16991007	Bos_taurus	Mammary	H3K4Me1	Adult	Friesian	female	NA
ERR9638505	PRJEB52456	SAMN16991007	Bos_taurus	Mammary	H3K4Me1	Adult	Friesian	female	NA
ERR9638506	PRJEB52456	SAMN16991007	Bos_taurus	Mammary	H3K4Me1	Adult	Friesian	female	NA
ERR9638507	PRJEB52456	SAMN16991007	Bos_taurus	Mammary	H3K4Me3	Adult	Friesian	female	NA
ERR9638508	PRJEB52456	SAMN16991007	Bos_taurus	Mammary	H3K4Me3	Adult	Friesian	female	NA
ERR9638509	PRJEB52456	SAMN16991007	Bos_taurus	Mammary	H3K4Me3	Adult	Friesian	female	NA
ERR9638510	PRJEB52456	SAMN16991007	Bos_taurus	Mammary	H3K4Me3	Adult	Friesian	female	NA
ERR9638511	PRJEB52456	SAMN16991007	Bos_taurus	Mammary	input	Adult	Friesian	female	NA
ERR9638512	PRJEB52456	SAMN16991007	Bos_taurus	Mammary	input	Adult	Friesian	female	NA
ERR9638513	PRJEB52456	SAMN16991007	Bos_taurus	Mammary	input	Adult	Friesian	female	NA
ERR9638514	PRJEB52456	SAMN16991007	Bos_taurus	Mammary	input	Adult	Friesian	female	NA
ERR9638515	PRJEB52456	SAMN16991017	Bos_taurus	Mammary	H3K27ac	Adult	Friesian	female	NA
ERR9638516	PRJEB52456	SAMN16991017	Bos_taurus	Mammary	H3K27ac	Adult	Friesian	female	NA
ERR9638517	PRJEB52456	SAMN16991017	Bos_taurus	Mammary	H3K27ac	Adult	Friesian	female	NA
ERR9638518	PRJEB52456	SAMN16991017	Bos_taurus	Mammary	H3K27ac	Adult	Friesian	female	NA
ERR9638519	PRJEB52456	SAMN16991017	Bos_taurus	Mammary	H3K4Me1	Adult	Friesian	female	NA
ERR9638520	PRJEB52456	SAMN16991017	Bos_taurus	Mammary	H3K4Me1	Adult	Friesian	female	NA
ERR9638521	PRJEB52456	SAMN16991017	Bos_taurus	Mammary	H3K4Me1	Adult	Friesian	female	NA
ERR9638522	PRJEB52456	SAMN16991017	Bos_taurus	Mammary	H3K4Me1	Adult	Friesian	female	NA
ERR9638523	PRJEB52456	SAMN16991017	Bos_taurus	Mammary	H3K4Me3	Adult	Friesian	female	NA
ERR9638524	PRJEB52456	SAMN16991017	Bos_taurus	Mammary	H3K4Me3	Adult	Friesian	female	NA
ERR9638525	PRJEB52456	SAMN16991017	Bos_taurus	Mammary	H3K4Me3	Adult	Friesian	female	NA
ERR9638526	PRJEB52456	SAMN16991017	Bos_taurus	Mammary	H3K4Me3	Adult	Friesian	female	NA
ERR9638527	PRJEB52456	SAMN16991017	Bos_taurus	Mammary	input	Adult	Friesian	female	NA
ERR9638528	PRJEB52456	SAMN16991017	Bos_taurus	Mammary	input	Adult	Friesian	female	NA
ERR9638529	PRJEB52456	SAMN16991017	Bos_taurus	Mammary	input	Adult	Friesian	female	NA
ERR9638530	PRJEB52456	SAMN16991017	Bos_taurus	Mammary	input	Adult	Friesian	female	NA
ERR9638531	PRJEB52456	SAMN16991243	Bos_taurus	Mammary	H3K27ac	Adult	Friesian	female	NA
ERR9638532	PRJEB52456	SAMN16991243	Bos_taurus	Mammary	H3K27ac	Adult	Friesian	female	NA
ERR9638533	PRJEB52456	SAMN16991243	Bos_taurus	Mammary	H3K27ac	Adult	Friesian	female	NA
ERR9638534	PRJEB52456	SAMN16991243	Bos_taurus	Mammary	H3K27ac	Adult	Friesian	female	NA
ERR9638535	PRJEB52456	SAMN16991243	Bos_taurus	Mammary	H3K4Me1	Adult	Friesian	female	NA
ERR9638536	PRJEB52456	SAMN16991243	Bos_taurus	Mammary	H3K4Me1	Adult	Friesian	female	NA
ERR9638537	PRJEB52456	SAMN16991243	Bos_taurus	Mammary	H3K4Me1	Adult	Friesian	female	NA
ERR9638538	PRJEB52456	SAMN16991243	Bos_taurus	Mammary	H3K4Me1	Adult	Friesian	female	NA
ERR9638539	PRJEB52456	SAMN16991243	Bos_taurus	Mammary	H3K4Me3	Adult	Friesian	female	NA
ERR9638540	PRJEB52456	SAMN16991243	Bos_taurus	Mammary	H3K4Me3	Adult	Friesian	female	NA
ERR9638541	PRJEB52456	SAMN16991243	Bos_taurus	Mammary	H3K4Me3	Adult	Friesian	female	NA
ERR9638542	PRJEB52456	SAMN16991243	Bos_taurus	Mammary	H3K4Me3	Adult	Friesian	female	NA
ERR9638543	PRJEB52456	SAMN16991243	Bos_taurus	Mammary	input	Adult	Friesian	female	NA
ERR9638544	PRJEB52456	SAMN16991243	Bos_taurus	Mammary	input	Adult	Friesian	female	NA
ERR9638545	PRJEB52456	SAMN16991243	Bos_taurus	Mammary	input	Adult	Friesian	female	NA
ERR9638546	PRJEB52456	SAMN16991243	Bos_taurus	Mammary	input	Adult	Friesian	female	NA
ERR9638547	PRJEB52456	SAMN16991043	Bos_taurus	Mammary	H3K4Me1	Adult	Friesian	female	NA
ERR9638548	PRJEB52456	SAMN16991043	Bos_taurus	Mammary	H3K4Me1	Adult	Friesian	female	NA
ERR9638549	PRJEB52456	SAMN16991043	Bos_taurus	Mammary	H3K4Me1	Adult	Friesian	female	NA
ERR9638550	PRJEB52456	SAMN16991043	Bos_taurus	Mammary	H3K4Me1	Adult	Friesian	female	NA
ERR9638551	PRJEB52456	SAMN16991043	Bos_taurus	Mammary	H3K4Me3	Adult	Friesian	female	NA
ERR9638552	PRJEB52456	SAMN16991043	Bos_taurus	Mammary	H3K4Me3	Adult	Friesian	female	NA
ERR9638553	PRJEB52456	SAMN16991043	Bos_taurus	Mammary	H3K4Me3	Adult	Friesian	female	NA
ERR9638554	PRJEB52456	SAMN16991043	Bos_taurus	Mammary	H3K4Me3	Adult	Friesian	female	NA
ERR9638555	PRJEB52456	SAMN16991043	Bos_taurus	Mammary	input	Adult	Friesian	female	NA
ERR9638556	PRJEB52456	SAMN16991043	Bos_taurus	Mammary	input	Adult	Friesian	female	NA
ERR9638557	PRJEB52456	SAMN16991043	Bos_taurus	Mammary	input	Adult	Friesian	female	NA
ERR9638558	PRJEB52456	SAMN16991043	Bos_taurus	Mammary	input	Adult	Friesian	female	NA
ERR9638559	PRJEB52456	SAMN16990904	Bos_taurus	Mammary	H3K4Me1	Adult	Friesian	female	NA
ERR9638560	PRJEB52456	SAMN16990904	Bos_taurus	Mammary	H3K4Me1	Adult	Friesian	female	NA
ERR9638561	PRJEB52456	SAMN16990904	Bos_taurus	Mammary	H3K4Me1	Adult	Friesian	female	NA
ERR9638562	PRJEB52456	SAMN16990904	Bos_taurus	Mammary	H3K4Me1	Adult	Friesian	female	NA
ERR9638563	PRJEB52456	SAMN16990904	Bos_taurus	Mammary	H3K4Me3	Adult	Friesian	female	NA
ERR9638564	PRJEB52456	SAMN16990904	Bos_taurus	Mammary	H3K4Me3	Adult	Friesian	female	NA
ERR9638565	PRJEB52456	SAMN16990904	Bos_taurus	Mammary	H3K4Me3	Adult	Friesian	female	NA
ERR9639362	PRJEB52456	SAMN16991026	Bos_taurus	Mammary	H3K4Me3	Adult	Friesian	female	NA
ERR9639363	PRJEB52456	SAMN16991026	Bos_taurus	Mammary	input	Adult	Friesian	female	NA
ERR9639364	PRJEB52456	SAMN16991173	Bos_taurus	Mammary	H3K27ac	Adult	Cross	female	NA
ERR9639365	PRJEB52456	SAMN16991173	Bos_taurus	Mammary	H3K4Me1	Adult	Cross	female	NA
ERR9639366	PRJEB52456	SAMN16991173	Bos_taurus	Mammary	H3K4Me3	Adult	Cross	female	NA
ERR9639367	PRJEB52456	SAMN16991173	Bos_taurus	Mammary	input	Adult	Cross	female	NA
ERR9639368	PRJEB52456	SAMN16990906	Bos_taurus	Mammary	H3K4Me1	Adult	Friesian	female	NA
ERR9639369	PRJEB52456	SAMN16990906	Bos_taurus	Mammary	H3K4Me3	Adult	Friesian	female	NA
ERR9639370	PRJEB52456	SAMN16990906	Bos_taurus	Mammary	input	Adult	Friesian	female	NA
ERR9639371	PRJEB52456	SAMN16991217	Bos_taurus	Mammary	H3K4Me1	Adult	Friesian	female	NA
ERR9639372	PRJEB52456	SAMN16991217	Bos_taurus	Mammary	H3K4Me3	Adult	Friesian	female	NA
ERR9639373	PRJEB52456	SAMN16991217	Bos_taurus	Mammary	input	Adult	Friesian	female	NA
ERR9639374	PRJEB52456	SAMN16990943	Bos_taurus	Mammary	H3K4Me1	Adult	unuseful	female	NA
ERR9639375	PRJEB52456	SAMN16990943	Bos_taurus	Mammary	H3K4Me3	Adult	unuseful	female	NA
ERR9639376	PRJEB52456	SAMN16990943	Bos_taurus	Mammary	input	Adult	unuseful	female	NA
ERR9639377	PRJEB52456	SAMN16991150	Bos_taurus	Mammary	H3K27ac	Adult	unuseful	female	NA
ERR9639378	PRJEB52456	SAMN16991150	Bos_taurus	Mammary	H3K4Me1	Adult	unuseful	female	NA
ERR9639379	PRJEB52456	SAMN16991150	Bos_taurus	Mammary	H3K4Me3	Adult	unuseful	female	NA
ERR9639380	PRJEB52456	SAMN16991150	Bos_taurus	Mammary	input	Adult	unuseful	female	NA
ERR9639381	PRJEB52456	SAMN16991090	Bos_taurus	Mammary	H3K4Me1	Adult	Friesian	female	NA
ERR9639382	PRJEB52456	SAMN16991090	Bos_taurus	Mammary	H3K4Me3	Adult	Friesian	female	NA
ERR9639383	PRJEB52456	SAMN16991077	Bos_taurus	Mammary	H3K27ac	Adult	Friesian	female	NA
ERR9639384	PRJEB52456	SAMN16991077	Bos_taurus	Mammary	H3K4Me1	Adult	Friesian	female	NA
ERR9639385	PRJEB52456	SAMN16991077	Bos_taurus	Mammary	H3K4Me3	Adult	Friesian	female	NA
ERR9639386	PRJEB52456	SAMN16991077	Bos_taurus	Mammary	input	Adult	Friesian	female	NA
ERR9639387	PRJEB52456	SAMN16991171	Bos_taurus	Mammary	H3K27ac	Adult	Friesian	female	NA
ERR9639388	PRJEB52456	SAMN16991171	Bos_taurus	Mammary	H3K4Me1	Adult	Friesian	female	NA
ERR9639389	PRJEB52456	SAMN16991171	Bos_taurus	Mammary	H3K4Me3	Adult	Friesian	female	NA
ERR9639390	PRJEB52456	SAMN16991171	Bos_taurus	Mammary	input	Adult	Friesian	female	NA
ERR9639391	PRJEB52456	SAMN16991075	Bos_taurus	Mammary	H3K4Me1	Adult	Friesian	female	NA
ERR9639392	PRJEB52456	SAMN16991075	Bos_taurus	Mammary	H3K4Me3	Adult	Friesian	female	NA
ERR9639393	PRJEB52456	SAMN16991075	Bos_taurus	Mammary	input	Adult	Friesian	female	NA
ERR9639394	PRJEB52456	SAMN16990930	Bos_taurus	Mammary	H3K4Me1	Adult	Friesian	female	NA
ERR9639395	PRJEB52456	SAMN16990930	Bos_taurus	Mammary	H3K4Me3	Adult	Friesian	female	NA
ERR9639396	PRJEB52456	SAMN16991066	Bos_taurus	Mammary	H3K4Me1	Adult	Friesian	female	NA
ERR9639397	PRJEB52456	SAMN16991066	Bos_taurus	Mammary	H3K4Me3	Adult	Friesian	female	NA
ERR9639398	PRJEB52456	SAMN16991066	Bos_taurus	Mammary	input	Adult	Friesian	female	NA
ERR9639399	PRJEB52456	SAMN16991190	Bos_taurus	Mammary	H3K4Me1	Adult	Friesian	female	NA
ERR9639400	PRJEB52456	SAMN16991190	Bos_taurus	Mammary	H3K4Me3	Adult	Friesian	female	NA
ERR9639401	PRJEB52456	SAMN16991190	Bos_taurus	Mammary	input	Adult	Friesian	female	NA
ERR9639402	PRJEB52456	SAMN16991183	Bos_taurus	Mammary	H3K4Me1	Adult	Friesian	female	NA
ERR9639403	PRJEB52456	SAMN16991183	Bos_taurus	Mammary	H3K4Me3	Adult	Friesian	female	NA
ERR9639404	PRJEB52456	SAMN16991183	Bos_taurus	Mammary	input	Adult	Friesian	female	NA
ERR9639405	PRJEB52456	SAMN16990917	Bos_taurus	Mammary	H3K27ac	Adult	Friesian	female	NA
ERR9639406	PRJEB52456	SAMN16990917	Bos_taurus	Mammary	H3K4Me1	Adult	Friesian	female	NA
ERR9639407	PRJEB52456	SAMN16990917	Bos_taurus	Mammary	H3K4Me3	Adult	Friesian	female	NA
ERR9639408	PRJEB52456	SAMN16991064	Bos_taurus	Mammary	H3K27ac	Adult	Friesian	female	NA
ERR9639409	PRJEB52456	SAMN16991064	Bos_taurus	Mammary	H3K4Me1	Adult	Friesian	female	NA
ERR9639410	PRJEB52456	SAMN16991064	Bos_taurus	Mammary	H3K4Me3	Adult	Friesian	female	NA
ERR9639411	PRJEB52456	SAMN16991064	Bos_taurus	Mammary	input	Adult	Friesian	female	NA
ERR9639412	PRJEB52456	SAMN16991079	Bos_taurus	Mammary	H3K27ac	Adult	Friesian	female	NA
ERR9639413	PRJEB52456	SAMN16991079	Bos_taurus	Mammary	H3K4Me1	Adult	Friesian	female	NA
ERR9639414	PRJEB52456	SAMN16991079	Bos_taurus	Mammary	H3K4Me3	Adult	Friesian	female	NA
ERR9639415	PRJEB52456	SAMN16991079	Bos_taurus	Mammary	input	Adult	Friesian	female	NA
ERR9639416	PRJEB52456	SAMN16991015	Bos_taurus	Mammary	H3K27ac	Adult	Friesian	female	NA
ERR9639417	PRJEB52456	SAMN16991015	Bos_taurus	Mammary	H3K4Me1	Adult	Friesian	female	NA
ERR9639418	PRJEB52456	SAMN16991015	Bos_taurus	Mammary	H3K4Me3	Adult	Friesian	female	NA
ERR9639419	PRJEB52456	SAMN16991015	Bos_taurus	Mammary	input	Adult	Friesian	female	NA
ERR9639420	PRJEB52456	SAMN16991179	Bos_taurus	Mammary	H3K4Me1	Adult	Friesian	female	NA
ERR9639421	PRJEB52456	SAMN16991179	Bos_taurus	Mammary	H3K4Me3	Adult	Friesian	female	NA
ERR9639422	PRJEB52456	SAMN16991179	Bos_taurus	Mammary	input	Adult	Friesian	female	NA
ERR9639423	PRJEB52456	SAMN16991177	Bos_taurus	Mammary	H3K4Me1	Adult	Jersey	female	NA
ERR9639424	PRJEB52456	SAMN16991177	Bos_taurus	Mammary	H3K4Me3	Adult	Jersey	female	NA
ERR9639425	PRJEB52456	SAMN16991177	Bos_taurus	Mammary	input	Adult	Jersey	female	NA
ERR9639426	PRJEB52456	SAMN16990985	Bos_taurus	Mammary	H3K4Me1	Adult	Friesian	female	NA
ERR9639427	PRJEB52456	SAMN16990985	Bos_taurus	Mammary	H3K4Me3	Adult	Friesian	female	NA
ERR9639428	PRJEB52456	SAMN16990985	Bos_taurus	Mammary	input	Adult	Friesian	female	NA
ERR9639429	PRJEB52456	SAMN16991106	Bos_taurus	Mammary	H3K27ac	Adult	Friesian	female	NA
ERR9639430	PRJEB52456	SAMN16991106	Bos_taurus	Mammary	H3K4Me1	Adult	Friesian	female	NA
ERR9639431	PRJEB52456	SAMN16991106	Bos_taurus	Mammary	H3K4Me3	Adult	Friesian	female	NA
ERR9639432	PRJEB52456	SAMN16991106	Bos_taurus	Mammary	input	Adult	Friesian	female	NA
ERR9639433	PRJEB52456	SAMN16991232	Bos_taurus	Mammary	H3K4Me1	Adult	Friesian	female	NA
ERR9639434	PRJEB52456	SAMN16991232	Bos_taurus	Mammary	H3K4Me3	Adult	Friesian	female	NA
ERR9639435	PRJEB52456	SAMN16991232	Bos_taurus	Mammary	input	Adult	Friesian	female	NA
ERR9639436	PRJEB52456	SAMN16991136	Bos_taurus	Mammary	H3K4Me1	Adult	Friesian	female	NA
ERR9639437	PRJEB52456	SAMN16991136	Bos_taurus	Mammary	input	Adult	Friesian	female	NA
ERR9639438	PRJEB52456	SAMN16991184	Bos_taurus	Mammary	H3K4Me1	Adult	Friesian	female	NA
ERR9639439	PRJEB52456	SAMN16991184	Bos_taurus	Mammary	H3K4Me3	Adult	Friesian	female	NA
ERR9639440	PRJEB52456	SAMN16991184	Bos_taurus	Mammary	input	Adult	Friesian	female	NA
ERR9639441	PRJEB52456	SAMN16990993	Bos_taurus	Mammary	H3K4Me1	Adult	Friesian	female	NA
ERR9639442	PRJEB52456	SAMN16990993	Bos_taurus	Mammary	H3K4Me3	Adult	Friesian	female	NA
ERR9639443	PRJEB52456	SAMN16990993	Bos_taurus	Mammary	input	Adult	Friesian	female	NA
ERR9639444	PRJEB52456	SAMN16990933	Bos_taurus	Mammary	H3K27ac	Adult	Friesian	female	NA
ERR9639445	PRJEB52456	SAMN16990933	Bos_taurus	Mammary	H3K4Me1	Adult	Friesian	female	NA
ERR9639446	PRJEB52456	SAMN16990933	Bos_taurus	Mammary	H3K4Me3	Adult	Friesian	female	NA
ERR9639447	PRJEB52456	SAMN16990933	Bos_taurus	Mammary	input	Adult	Friesian	female	NA
ERR9639448	PRJEB52456	SAMN16991213	Bos_taurus	Mammary	H3K4Me1	Adult	Friesian	female	NA
ERR9639449	PRJEB52456	SAMN16991213	Bos_taurus	Mammary	H3K4Me3	Adult	Friesian	female	NA
ERR9639450	PRJEB52456	SAMN16991213	Bos_taurus	Mammary	input	Adult	Friesian	female	NA
ERR9639451	PRJEB52456	SAMN16991208	Bos_taurus	Mammary	H3K4Me1	Adult	Friesian	female	NA
ERR9639452	PRJEB52456	SAMN16991208	Bos_taurus	Mammary	H3K4Me3	Adult	Friesian	female	NA
ERR9639453	PRJEB52456	SAMN16991208	Bos_taurus	Mammary	input	Adult	Friesian	female	NA
ERR9639454	PRJEB52456	SAMN16991143	Bos_taurus	Mammary	H3K27ac	Adult	Friesian	female	NA
ERR9639455	PRJEB52456	SAMN16991143	Bos_taurus	Mammary	H3K4Me1	Adult	Friesian	female	NA
ERR9639456	PRJEB52456	SAMN16991143	Bos_taurus	Mammary	H3K4Me3	Adult	Friesian	female	NA
ERR9639457	PRJEB52456	SAMN16991143	Bos_taurus	Mammary	input	Adult	Friesian	female	NA
ERR9639458	PRJEB52456	SAMN16991203	Bos_taurus	Mammary	H3K4Me1	Adult	Friesian	female	NA
ERR9639459	PRJEB52456	SAMN16991203	Bos_taurus	Mammary	H3K4Me3	Adult	Friesian	female	NA
ERR9639460	PRJEB52456	SAMN16991203	Bos_taurus	Mammary	input	Adult	Friesian	female	NA
ERR9639461	PRJEB52456	SAMN16991029	Bos_taurus	Mammary	H3K4Me1	Adult	Friesian	female	NA
ERR9639462	PRJEB52456	SAMN16991029	Bos_taurus	Mammary	H3K4Me3	Adult	Friesian	female	NA
ERR9639463	PRJEB52456	SAMN16991029	Bos_taurus	Mammary	input	Adult	Friesian	female	NA
ERR9639464	PRJEB52456	SAMN16991116	Bos_taurus	Mammary	H3K27ac	Adult	Friesian	female	NA
ERR9639465	PRJEB52456	SAMN16991116	Bos_taurus	Mammary	H3K4Me1	Adult	Friesian	female	NA
ERR9639466	PRJEB52456	SAMN16991116	Bos_taurus	Mammary	H3K4Me3	Adult	Friesian	female	NA
ERR9639467	PRJEB52456	SAMN16991116	Bos_taurus	Mammary	input	Adult	Friesian	female	NA
ERR9639468	PRJEB52456	SAMN16990998	Bos_taurus	Mammary	H3K4Me1	Adult	Friesian	female	NA
ERR9639469	PRJEB52456	SAMN16990998	Bos_taurus	Mammary	H3K4Me3	Adult	Friesian	female	NA
ERR9639470	PRJEB52456	SAMN16990998	Bos_taurus	Mammary	input	Adult	Friesian	female	NA
ERR9639471	PRJEB52456	SAMN16990988	Bos_taurus	Mammary	H3K4Me1	Adult	Friesian	female	NA
ERR9639472	PRJEB52456	SAMN16990988	Bos_taurus	Mammary	H3K4Me3	Adult	Friesian	female	NA
ERR9639473	PRJEB52456	SAMN16990988	Bos_taurus	Mammary	input	Adult	Friesian	female	NA
ERR9639474	PRJEB52456	SAMN16990912	Bos_taurus	Mammary	H3K4Me1	Adult	unuseful	female	NA
ERR9639475	PRJEB52456	SAMN16990912	Bos_taurus	Mammary	H3K4Me3	Adult	unuseful	female	NA
ERR9639476	PRJEB52456	SAMN16990912	Bos_taurus	Mammary	input	Adult	unuseful	female	NA
ERR9639477	PRJEB52456	SAMN16991110	Bos_taurus	Mammary	H3K4Me1	Adult	Friesian	female	NA
ERR9639478	PRJEB52456	SAMN16991110	Bos_taurus	Mammary	H3K4Me3	Adult	Friesian	female	NA
ERR9639479	PRJEB52456	SAMN16991110	Bos_taurus	Mammary	input	Adult	Friesian	female	NA
ERR9639480	PRJEB52456	SAMN16990986	Bos_taurus	Mammary	H3K4Me1	Adult	Friesian	female	NA
ERR9639481	PRJEB52456	SAMN16990986	Bos_taurus	Mammary	H3K4Me3	Adult	Friesian	female	NA
ERR9639482	PRJEB52456	SAMN16990986	Bos_taurus	Mammary	input	Adult	Friesian	female	NA
ERR9639483	PRJEB52456	SAMN16990984	Bos_taurus	Mammary	H3K4Me1	Adult	Friesian	female	NA
ERR9639484	PRJEB52456	SAMN16990984	Bos_taurus	Mammary	H3K4Me3	Adult	Friesian	female	NA
ERR9639485	PRJEB52456	SAMN16990984	Bos_taurus	Mammary	input	Adult	Friesian	female	NA
ERR9639486	PRJEB52456	SAMN16991041	Bos_taurus	Mammary	H3K4Me3	Adult	Friesian	female	NA
ERR9639487	PRJEB52456	SAMN16991041	Bos_taurus	Mammary	input	Adult	Friesian	female	NA
ERR9639488	PRJEB52456	SAMN16991128	Bos_taurus	Mammary	H3K27ac	Adult	Friesian	female	NA
ERR9639489	PRJEB52456	SAMN16991128	Bos_taurus	Mammary	H3K4Me1	Adult	Friesian	female	NA
ERR9639490	PRJEB52456	SAMN16991128	Bos_taurus	Mammary	H3K4Me3	Adult	Friesian	female	NA
ERR9639491	PRJEB52456	SAMN16991128	Bos_taurus	Mammary	input	Adult	Friesian	female	NA
ERR9639492	PRJEB52456	SAMN16990919	Bos_taurus	Mammary	H3K4Me1	Adult	Friesian	female	NA
ERR9639493	PRJEB52456	SAMN16990919	Bos_taurus	Mammary	H3K4Me3	Adult	Friesian	female	NA
ERR9639494	PRJEB52456	SAMN16990919	Bos_taurus	Mammary	input	Adult	Friesian	female	NA
ERR9639495	PRJEB52456	SAMN16991162	Bos_taurus	Mammary	H3K27ac	Adult	unuseful	female	NA
ERR9639496	PRJEB52456	SAMN16991162	Bos_taurus	Mammary	H3K4Me1	Adult	unuseful	female	NA
ERR9639497	PRJEB52456	SAMN16991162	Bos_taurus	Mammary	H3K4Me3	Adult	unuseful	female	NA
ERR9639498	PRJEB52456	SAMN16991162	Bos_taurus	Mammary	input	Adult	unuseful	female	NA
ERR9639499	PRJEB52456	SAMN16991206	Bos_taurus	Mammary	H3K27ac	Adult	Friesian	female	NA
ERR9639500	PRJEB52456	SAMN16991206	Bos_taurus	Mammary	H3K4Me1	Adult	Friesian	female	NA
ERR9639501	PRJEB52456	SAMN16991206	Bos_taurus	Mammary	H3K4Me3	Adult	Friesian	female	NA
ERR9639502	PRJEB52456	SAMN16991206	Bos_taurus	Mammary	input	Adult	Friesian	female	NA
ERR9639503	PRJEB52456	SAMN16991092	Bos_taurus	Mammary	H3K4Me1	Adult	Friesian	female	NA
ERR9639504	PRJEB52456	SAMN16991092	Bos_taurus	Mammary	H3K4Me3	Adult	Friesian	female	NA
ERR9639505	PRJEB52456	SAMN16991092	Bos_taurus	Mammary	input	Adult	Friesian	female	NA
ERR9639506	PRJEB52456	SAMN16991169	Bos_taurus	Mammary	H3K4Me1	Adult	Friesian	female	NA
ERR9639507	PRJEB52456	SAMN16991169	Bos_taurus	Mammary	H3K4Me3	Adult	Friesian	female	NA
ERR9639508	PRJEB52456	SAMN16991169	Bos_taurus	Mammary	input	Adult	Friesian	female	NA
ERR9639509	PRJEB52456	SAMN16990909	Bos_taurus	Mammary	H3K4Me1	Adult	Friesian	female	NA
ERR9639510	PRJEB52456	SAMN16990909	Bos_taurus	Mammary	H3K4Me3	Adult	Friesian	female	NA
ERR9639511	PRJEB52456	SAMN16990909	Bos_taurus	Mammary	input	Adult	Friesian	female	NA
ERR9639512	PRJEB52456	SAMN16991081	Bos_taurus	Mammary	H3K27ac	Adult	Friesian	female	NA
ERR9639513	PRJEB52456	SAMN16991081	Bos_taurus	Mammary	H3K4Me1	Adult	Friesian	female	NA
ERR9639514	PRJEB52456	SAMN16991081	Bos_taurus	Mammary	H3K4Me3	Adult	Friesian	female	NA
ERR9639515	PRJEB52456	SAMN16991081	Bos_taurus	Mammary	input	Adult	Friesian	female	NA
ERR9639516	PRJEB52456	SAMN16991149	Bos_taurus	Mammary	H3K4Me1	Adult	Friesian	female	NA
ERR9639517	PRJEB52456	SAMN16991149	Bos_taurus	Mammary	H3K4Me3	Adult	Friesian	female	NA
ERR9639518	PRJEB52456	SAMN16991149	Bos_taurus	Mammary	input	Adult	Friesian	female	NA
ERR9639519	PRJEB52456	SAMN16991181	Bos_taurus	Mammary	H3K27ac	Adult	Friesian	female	NA
ERR9639520	PRJEB52456	SAMN16991181	Bos_taurus	Mammary	H3K4Me1	Adult	Friesian	female	NA
ERR9639521	PRJEB52456	SAMN16991181	Bos_taurus	Mammary	H3K4Me3	Adult	Friesian	female	NA
ERR9639522	PRJEB52456	SAMN16991181	Bos_taurus	Mammary	input	Adult	Friesian	female	NA
ERR9639523	PRJEB52456	SAMN16991148	Bos_taurus	Mammary	H3K4Me1	Adult	Friesian	female	NA
ERR9639524	PRJEB52456	SAMN16991148	Bos_taurus	Mammary	H3K4Me3	Adult	Friesian	female	NA
ERR9639525	PRJEB52456	SAMN16991148	Bos_taurus	Mammary	input	Adult	Friesian	female	NA
ERR9639526	PRJEB52456	SAMN16991224	Bos_taurus	Mammary	H3K27ac	Adult	unuseful	female	NA
ERR9639527	PRJEB52456	SAMN16991224	Bos_taurus	Mammary	H3K4Me1	Adult	unuseful	female	NA
ERR9639528	PRJEB52456	SAMN16991224	Bos_taurus	Mammary	H3K4Me3	Adult	unuseful	female	NA
ERR9639529	PRJEB52456	SAMN16991224	Bos_taurus	Mammary	input	Adult	unuseful	female	NA
ERR9639530	PRJEB52456	SAMN16990981	Bos_taurus	Mammary	H3K4Me1	Adult	Friesian	female	NA
ERR9639531	PRJEB52456	SAMN16990981	Bos_taurus	Mammary	H3K4Me3	Adult	Friesian	female	NA
ERR9639532	PRJEB52456	SAMN16990981	Bos_taurus	Mammary	input	Adult	Friesian	female	NA
ERR9639533	PRJEB52456	SAMN16991158	Bos_taurus	Mammary	H3K4Me1	Adult	Friesian	female	NA
ERR9639534	PRJEB52456	SAMN16991158	Bos_taurus	Mammary	H3K4Me3	Adult	Friesian	female	NA
ERR9639535	PRJEB52456	SAMN16991158	Bos_taurus	Mammary	input	Adult	Friesian	female	NA
ERR9639536	PRJEB52456	SAMN16991134	Bos_taurus	Mammary	H3K4Me1	Adult	unuseful	female	NA
ERR9639537	PRJEB52456	SAMN16991134	Bos_taurus	Mammary	H3K4Me3	Adult	unuseful	female	NA
ERR9639538	PRJEB52456	SAMN16991134	Bos_taurus	Mammary	input	Adult	unuseful	female	NA
ERR9639539	PRJEB52456	SAMN16991034	Bos_taurus	Mammary	H3K4Me1	Adult	Friesian	female	NA
ERR9639540	PRJEB52456	SAMN16991034	Bos_taurus	Mammary	H3K4Me3	Adult	Friesian	female	NA
ERR9639541	PRJEB52456	SAMN16991034	Bos_taurus	Mammary	input	Adult	Friesian	female	NA
ERR9639542	PRJEB52456	SAMN16990946	Bos_taurus	Mammary	H3K4Me1	Adult	Friesian	female	NA
ERR9639543	PRJEB52456	SAMN16990946	Bos_taurus	Mammary	H3K4Me3	Adult	Friesian	female	NA
ERR9639544	PRJEB52456	SAMN16990946	Bos_taurus	Mammary	input	Adult	Friesian	female	NA
ERR9639545	PRJEB52456	SAMN16990942	Bos_taurus	Mammary	H3K27ac	Adult	Friesian	female	NA
ERR9639546	PRJEB52456	SAMN16990942	Bos_taurus	Mammary	H3K4Me1	Adult	Friesian	female	NA
ERR9639547	PRJEB52456	SAMN16990942	Bos_taurus	Mammary	H3K4Me3	Adult	Friesian	female	NA
ERR9639548	PRJEB52456	SAMN16990942	Bos_taurus	Mammary	input	Adult	Friesian	female	NA
ERR9639549	PRJEB52456	SAMN16991055	Bos_taurus	Mammary	H3K27ac	Adult	Friesian	female	NA
ERR9639550	PRJEB52456	SAMN16991055	Bos_taurus	Mammary	H3K4Me1	Adult	Friesian	female	NA
ERR9639551	PRJEB52456	SAMN16991055	Bos_taurus	Mammary	H3K4Me3	Adult	Friesian	female	NA
ERR9639552	PRJEB52456	SAMN16991055	Bos_taurus	Mammary	input	Adult	Friesian	female	NA
ERR9639553	PRJEB52456	SAMN16991049	Bos_taurus	Mammary	H3K4Me1	Adult	unuseful	female	NA
ERR9639554	PRJEB52456	SAMN16991049	Bos_taurus	Mammary	H3K4Me3	Adult	unuseful	female	NA
ERR9639555	PRJEB52456	SAMN16991049	Bos_taurus	Mammary	input	Adult	unuseful	female	NA
ERR9639556	PRJEB52456	SAMN16991113	Bos_taurus	Mammary	H3K4Me1	Adult	Friesian	female	NA
ERR9639557	PRJEB52456	SAMN16991113	Bos_taurus	Mammary	H3K4Me3	Adult	Friesian	female	NA
ERR9639558	PRJEB52456	SAMN16991113	Bos_taurus	Mammary	input	Adult	Friesian	female	NA
ERR9639559	PRJEB52456	SAMN16991133	Bos_taurus	Mammary	H3K4Me1	Adult	Friesian	female	NA
ERR9639560	PRJEB52456	SAMN16991133	Bos_taurus	Mammary	H3K4Me3	Adult	Friesian	female	NA
ERR9639561	PRJEB52456	SAMN16991133	Bos_taurus	Mammary	input	Adult	Friesian	female	NA
ERR9639562	PRJEB52456	SAMN16990965	Bos_taurus	Mammary	H3K27ac	Adult	Friesian	female	NA
ERR9639563	PRJEB52456	SAMN16990965	Bos_taurus	Mammary	H3K4Me1	Adult	Friesian	female	NA
ERR9639564	PRJEB52456	SAMN16990965	Bos_taurus	Mammary	H3K4Me3	Adult	Friesian	female	NA
ERR9639565	PRJEB52456	SAMN16990965	Bos_taurus	Mammary	input	Adult	Friesian	female	NA
ERR9639566	PRJEB52456	SAMN16991032	Bos_taurus	Mammary	H3K4Me1	Adult	Friesian	female	NA
ERR9639567	PRJEB52456	SAMN16991032	Bos_taurus	Mammary	H3K4Me3	Adult	Friesian	female	NA
ERR9639568	PRJEB52456	SAMN16991032	Bos_taurus	Mammary	input	Adult	Friesian	female	NA
ERR9639569	PRJEB52456	SAMN16991002	Bos_taurus	Mammary	H3K4Me1	Adult	Friesian	female	NA
ERR9639570	PRJEB52456	SAMN16991002	Bos_taurus	Mammary	H3K4Me3	Adult	Friesian	female	NA
ERR9639571	PRJEB52456	SAMN16991002	Bos_taurus	Mammary	input	Adult	Friesian	female	NA
ERR9639572	PRJEB52456	SAMN16991170	Bos_taurus	Mammary	H3K27ac	Adult	Friesian	female	NA
ERR9639573	PRJEB52456	SAMN16991170	Bos_taurus	Mammary	H3K4Me1	Adult	Friesian	female	NA
ERR9639574	PRJEB52456	SAMN16991170	Bos_taurus	Mammary	H3K4Me3	Adult	Friesian	female	NA
ERR9639575	PRJEB52456	SAMN16991170	Bos_taurus	Mammary	input	Adult	Friesian	female	NA
ERR9639576	PRJEB52456	SAMN16991022	Bos_taurus	Mammary	H3K4Me1	Adult	Friesian	female	NA
ERR9639577	PRJEB52456	SAMN16991022	Bos_taurus	Mammary	H3K4Me3	Adult	Friesian	female	NA
ERR9639578	PRJEB52456	SAMN16991022	Bos_taurus	Mammary	input	Adult	Friesian	female	NA
ERR9639579	PRJEB52456	SAMN16991026	Bos_taurus	Mammary	H3K4Me1	Adult	Friesian	female	NA
ERR9639580	PRJEB52456	SAMN16991026	Bos_taurus	Mammary	H3K4Me3	Adult	Friesian	female	NA
ERR9639581	PRJEB52456	SAMN16991026	Bos_taurus	Mammary	input	Adult	Friesian	female	NA
ERR9639582	PRJEB52456	SAMN16991173	Bos_taurus	Mammary	H3K27ac	Adult	Cross	female	NA
ERR9639583	PRJEB52456	SAMN16991173	Bos_taurus	Mammary	H3K4Me1	Adult	Cross	female	NA
ERR9639584	PRJEB52456	SAMN16991173	Bos_taurus	Mammary	H3K4Me3	Adult	Cross	female	NA
ERR9639585	PRJEB52456	SAMN16991173	Bos_taurus	Mammary	input	Adult	Cross	female	NA
ERR9639586	PRJEB52456	SAMN16990906	Bos_taurus	Mammary	H3K4Me1	Adult	Friesian	female	NA
ERR9639587	PRJEB52456	SAMN16990906	Bos_taurus	Mammary	H3K4Me3	Adult	Friesian	female	NA
ERR9639588	PRJEB52456	SAMN16990906	Bos_taurus	Mammary	input	Adult	Friesian	female	NA
ERR9639589	PRJEB52456	SAMN16991217	Bos_taurus	Mammary	H3K4Me1	Adult	Friesian	female	NA
ERR9639590	PRJEB52456	SAMN16991217	Bos_taurus	Mammary	H3K4Me3	Adult	Friesian	female	NA
ERR9639591	PRJEB52456	SAMN16991217	Bos_taurus	Mammary	input	Adult	Friesian	female	NA
ERR9639592	PRJEB52456	SAMN16990943	Bos_taurus	Mammary	H3K4Me1	Adult	unuseful	female	NA
ERR9639593	PRJEB52456	SAMN16990943	Bos_taurus	Mammary	H3K4Me3	Adult	unuseful	female	NA
ERR9639594	PRJEB52456	SAMN16990943	Bos_taurus	Mammary	input	Adult	unuseful	female	NA
ERR9639595	PRJEB52456	SAMN16991150	Bos_taurus	Mammary	H3K27ac	Adult	unuseful	female	NA
ERR9639596	PRJEB52456	SAMN16991150	Bos_taurus	Mammary	H3K4Me1	Adult	unuseful	female	NA
ERR9639597	PRJEB52456	SAMN16991150	Bos_taurus	Mammary	H3K4Me3	Adult	unuseful	female	NA
ERR9639598	PRJEB52456	SAMN16991150	Bos_taurus	Mammary	input	Adult	unuseful	female	NA
ERR9639599	PRJEB52456	SAMN16991077	Bos_taurus	Mammary	H3K27ac	Adult	Friesian	female	NA
ERR9639600	PRJEB52456	SAMN16991077	Bos_taurus	Mammary	H3K4Me1	Adult	Friesian	female	NA
ERR9639601	PRJEB52456	SAMN16991077	Bos_taurus	Mammary	H3K4Me3	Adult	Friesian	female	NA
[truncated: 3,960 more rows]

## Sheet: Table S9
Run	Biosample	BioProject	Species	Total number of reads	Mapped number of reads	Mapping ratio	Total Bases	GC content	Mean depth
[truncated: 5 more rows]
